# Supplementary material for: HT-smFISH: a cost-effective and flexible workflow for high-throughput single-molecule RNA imaging
Source: Springer Nature journal article supplement (doi:10.1038/s41596-022-00750-2), 2022-10-24
Supplement: MOESM2 [file 41596_2022_750_MOESM2_ESM21.xlsx]

## Sheet: Barcodes and their PCR primers
OG PlateNumber	Well Position	OG BarcodeID	Sequence to order	Barcode
1	A1	1	TCCCATGGGCAGTATCGCTTTGAGC	TCCCATGGGCAGTATCGCTTTGAGC
1	A2	2	GGCTAGAACAGCCAGAGAGTATACC	GGTATACTCTCTGGCTGTTCTAGCC
1	A3	3	ATGTGGCTGGCCGTTCCTTGTAGAC	ATGTGGCTGGCCGTTCCTTGTAGAC
1	A4	4	AACAACACTGGCGCCGGAAAACTCT	AGAGTTTTCCGGCGCCAGTGTTGTT
1	A5	5	TTCAGGGTCTCCGGATGGGGTCATA	TTCAGGGTCTCCGGATGGGGTCATA
1	A6	6	ACAGAGTGGCAGTCCGCAACATACC	GGTATGTTGCGGACTGCCACTCTGT
1	A7	7	GGACAGTTTAGCCCATCTGCTAGGT	GGACAGTTTAGCCCATCTGCTAGGT
1	A8	8	GCGGACGACACTACACACTAACGCA	TGCGTTAGTGTGTAGTGTCGTCCGC
1	A9	9	TGTCCTGCCAAGCCGGTTATGTTCT	TGTCCTGCCAAGCCGGTTATGTTCT
1	A10	10	GACTGGGTCATGGACCCGAAGTAAC	GTTACTTCGGGTCCATGACCCAGTC
1	A11	11	TTTCGTTTCACTCCCCGGGTTGGTA	TTTCGTTTCACTCCCCGGGTTGGTA
1	A12	12	ACCCGAGAGGCTGGAACTCCTATAA	TTATAGGAGTTCCAGCCTCTCGGGT
1	B1	13	GTCACCTATGCTGGGTTCGCGTGTA	GTCACCTATGCTGGGTTCGCGTGTA
1	B2	14	ACCTCAGGGAGTGGATCTAACTGCT	AGCAGTTAGATCCACTCCCTGAGGT
1	B3	15	ACAGTGTCGTGGCTCCTCTCCAATC	ACAGTGTCGTGGCTCCTCTCCAATC
1	B4	16	GCTGAACAGGGAAAGATGATCCGGA	TCCGGATCATCTTTCCCTGTTCAGC
1	B5	17	ATACGTTCGTTTCCTCTGGGTGGGC	ATACGTTCGTTTCCTCTGGGTGGGC
1	B6	18	ACCACATCGACAGGGACTGTGAAAC	GTTTCACAGTCCCTGTCGATGTGGT
1	B7	19	TGGCAGGGTTCTTCACGGTTCCTTT	TGGCAGGGTTCTTCACGGTTCCTTT
1	B8	20	GGTTGGGCAGCTGACAGTCTAGACT	AGTCTAGACTGTCAGCTGCCCAACC
1	B9	21	GGTGTTTTAGCATTCTGGGGCTAGC	GGTGTTTTAGCATTCTGGGGCTAGC
1	B10	22	AGGGCACGGATATCAAACCACTAGC	GCTAGTGGTTTGATATCCGTGCCCT
1	B11	23	ACCAGACATTGCCTGTCCCAGGTTA	ACCAGACATTGCCTGTCCCAGGTTA
1	B12	24	TTAGAGAGACGAGGGCCAAACTCAC	GTGAGTTTGGCCCTCGTCTCTCTAA
1	C1	25	CTCTTATAGCCCACTGCCTGAGCTT	CTCTTATAGCCCACTGCCTGAGCTT
1	C2	26	GAAGGGAACCGGACTAACCAAAACT	AGTTTTGGTTAGTCCGGTTCCCTTC
1	C3	27	GTAGTGAGCCCTGTGCGCAGTTTTG	GTAGTGAGCCCTGTGCGCAGTTTTG
1	C4	28	GACCTGGGACGGACTGTATGGAAAT	ATTTCCATACAGTCCGTCCCAGGTC
1	C5	29	AGGGCAATAGTCGCTAGGCCTGTCT	AGGGCAATAGTCGCTAGGCCTGTCT
1	C6	30	TGACTCCCCTAAGGAAGACATGCCT	AGGCATGTCTTCCTTAGGGGAGTCA
1	C7	31	ACGGGTTGTAGTCGTTCTAGCCAGC	ACGGGTTGTAGTCGTTCTAGCCAGC
1	C8	32	GGACGAAGGCTCCAGCAAAGAGTCA	TGACTCTTTGCTGGAGCCTTCGTCC
1	C9	33	GCTGAGTTTAACCCTCCTGTCCCGA	GCTGAGTTTAACCCTCCTGTCCCGA
1	C10	34	CTAAAGCCTCTAGGGAACGGCCACA	TGTGGCCGTTCCCTAGAGGCTTTAG
1	C11	35	GTTAGGTAATAGCCGGGGCCCTTCA	GTTAGGTAATAGCCGGGGCCCTTCA
1	C12	36	GGTCCACGGCCAGAAAGACCACTAT	ATAGTGGTCTTTCTGGCCGTGGACC
1	D1	37	TCTAGCGGTAGAGTGGTAGTCCCAC	TCTAGCGGTAGAGTGGTAGTCCCAC
1	D2	38	GCCCCAGAAGTAGATAAGAGAGACC	GGTCTCTCTTATCTACTTCTGGGGC
1	D3	39	TTGGGTCTGATCCGTTGGTACCTGC	TTGGGTCTGATCCGTTGGTACCTGC
1	D4	40	AACAGGGACATACCTACCGTCGCAC	GTGCGACGGTAGGTATGTCCCTGTT
1	D5	41	GTGCCTGGATAGGTCGTGCCTTCAA	GTGCCTGGATAGGTCGTGCCTTCAA
1	D6	42	ACACTCAAGGCGCCGATGATGAACC	GGTTCATCATCGGCGCCTTGAGTGT
1	D7	43	CTCTCCTGCGGAAGCAGTCTGCTTT	CTCTCCTGCGGAAGCAGTCTGCTTT
1	D8	44	TGAATCAAGGGCCCCTAGATAGGCG	CGCCTATCTAGGGGCCCTTGATTCA
1	D9	45	GTTTAGCTTGCCCACGGTGAGAGTC	GTTTAGCTTGCCCACGGTGAGAGTC
1	D10	46	GGATGAGGGCAAATACTAGTACCCC	GGGGTACTAGTATTTGCCCTCATCC
1	D11	47	TTTCCTTCCGAGTACGCCTCCCTAT	TTTCCTTCCGAGTACGCCTCCCTAT
1	D12	48	ACAAATTGCGGAAGGAGCCTGAGAC	GTCTCAGGCTCCTTCCGCAATTTGT
1	E1	49	TCTGTTCGGTTATAGGTGCTTGCCC	TCTGTTCGGTTATAGGTGCTTGCCC
1	E2	50	AGAGCACTTAGGCGACTCTGTGGAC	GTCCACAGAGTCGCCTAAGTGCTCT
1	E3	51	GCTGGAGGTAAGTTTCCACCCCGTA	GCTGGAGGTAAGTTTCCACCCCGTA
1	E4	52	GTCGTAAACTAGACCTGGACCAGGC	GCCTGGTCCAGGTCTAGTTTACGAC
1	E5	53	GGCTGACATGCCATCTAGCGTCTCT	GGCTGACATGCCATCTAGCGTCTCT
1	E6	54	ACCATGGACCCCTGATTAACGGACC	GGTCCGTTAATCAGGGGTCCATGGT
1	E7	55	AGGTGTTCACCTTCGCCTCATTCGT	AGGTGTTCACCTTCGCCTCATTCGT
1	E8	56	GGAGTCAGGCCAGATCACCTGCAAT	ATTGCAGGTGATCTGGCCTGACTCC
1	E9	57	GGCGAGTCGTAGGACCCTCCTTTTA	GGCGAGTCGTAGGACCCTCCTTTTA
1	E10	58	AGCTTGAGGACGATCCAAAGCACCC	GGGTGCTTTGGATCGTCCTCAAGCT
1	E11	59	GTGGCCATCCAAGTGTTGCTGGTTA	GTGGCCATCCAAGTGTTGCTGGTTA
1	E12	60	CTAGAGTGGAGCAGCAAGGGATCGA	TCGATCCCTTGCTGCTCCACTCTAG
1	F1	61	AGTTGTATTGCCCATGGCGTTCTCC	AGTTGTATTGCCCATGGCGTTCTCC
1	F2	62	CCGCGGCTAGGACAGACAATAGAAC	GTTCTATTGTCTGTCCTAGCCGCGG
1	F3	63	CTTTGCGTGGCTTCACTAGGTCGCT	CTTTGCGTGGCTTCACTAGGTCGCT
1	F4	64	AGGGTCAGGCACTAGTACCTCCCAA	TTGGGAGGTACTAGTGCCTGACCCT
1	F5	65	GTCAGGGTCGTGTTCTTGGATCGTC	GTCAGGGTCGTGTTCTTGGATCGTC
1	F6	66	CGGAGGGCTAAGCGGAAAGATACTG	CAGTATCTTTCCGCTTAGCCCTCCG
1	F7	67	AGTCATACCCATGCCTTCCCTATCA	AGTCATACCCATGCCTTCCCTATCA
1	F8	68	CCACCCTGGGAAGTATGCCAAGACA	TGTCTTGGCATACTTCCCAGGGTGG
1	F9	69	CAGGGGTCAGCGTTCTATCCAGTGA	CAGGGGTCAGCGTTCTATCCAGTGA
1	F10	70	CCGGCTCTAAAACTAACAGCCTGGC	GCCAGGCTGTTAGTTTTAGAGCCGG
1	F11	71	GTATAGCCTGCGAGGTCCGTAGCTG	GTATAGCCTGCGAGGTCCGTAGCTG
1	F12	72	TGCGCCAGAGAGGGAAATACACATC	GATGTGTATTTCCCTCTCTGGCGCA
1	G1	73	CCCGGGTCCCGTACATTTGCCTTTA	CCCGGGTCCCGTACATTTGCCTTTA
1	G2	74	CACCTGTAAGGAGTGCAAGACACCC	GGGTGTCTTGCACTCCTTACAGGTG
1	G3	75	CCCATTCCGGTGGGTTCGCTTCATA	CCCATTCCGGTGGGTTCGCTTCATA
1	G4	76	TATAGGAACTGGATGGGCCGTGCTC	GAGCACGGCCCATCCAGTTCCTATA
1	G5	77	GCTTCAGAGGCTCGGTACTCTCAGA	GCTTCAGAGGCTCGGTACTCTCAGA
1	G6	78	ACTACCTGGACGAAGAACCGCCGTA	TACGGCGGTTCTTCGTCCAGGTAGT
1	G7	79	CTTTAGTGATCCGGCGCCTTCCCAT	CTTTAGTGATCCGGCGCCTTCCCAT
1	G8	80	AGCTGTGGAGTGCTAGCTACCAGTG	CACTGGTAGCTAGCACTCCACAGCT
1	G9	81	GTGTAGCAGTGGCCCAATTCTTGCA	GTGTAGCAGTGGCCCAATTCTTGCA
1	G10	82	ATGAATCGGGCACAGGACTGCTACA	TGTAGCAGTCCTGTGCCCGATTCAT
1	G11	83	TCGTTTTGTGTTGGCCCCTCAGATC	TCGTTTTGTGTTGGCCCCTCAGATC
1	G12	84	AGGTACCCAGTGCTATGCCCTAAGC	GCTTAGGGCATAGCACTGGGTACCT
1	H1	85	CATGTCTCACTATGCAGTCGCCCGT	CATGTCTCACTATGCAGTCGCCCGT
1	H2	86	TAGGATCTGCAGAGAAACCCACCAG	CTGGTGGGTTTCTCTGCAGATCCTA
1	H3	87	CTGACTTAGTCGGGCCTGTTTGGCT	CTGACTTAGTCGGGCCTGTTTGGCT
1	H4	88	GGGAGAGTTATATGCCCTGGCCCAG	CTGGGCCAGGGCATATAACTCTCCC
1	H5	89	GCATTCCAGCGTCAGTTGTCGTTCA	GCATTCCAGCGTCAGTTGTCGTTCA
1	H6	90	TGCGCAGTGGACTAAGAACCTCCTC	GAGGAGGTTCTTAGTCCACTGCGCA
1	H7	91	GTTAGCTGCGCTCGGGCTTATCACT	GTTAGCTGCGCTCGGGCTTATCACT
1	H8	92	GAATGGGTGTGCAGATGGTAAGGCC	GGCCTTACCATCTGCACACCCATTC
1	H9	93	GGTAATCGCCCACTAGTCCCTAGTC	GGTAATCGCCCACTAGTCCCTAGTC
1	H10	94	GGGTCAACCACGACGGAGGATCATG	CATGATCCTCCGTCGTGGTTGACCC
1	H11	95	AGAGTTGATCCAGGCCCCACTGTTA	AGAGTTGATCCAGGCCCCACTGTTA
1	H12	96	CCCCTGAGAAATGAGGCAATCAGCC	GGCTGATTGCCTCATTTCTCAGGGG
2	A1	97	ACTTGGTAGATCCGTCCTGGCTGTT	ACTTGGTAGATCCGTCCTGGCTGTT
2	A2	98	AGATAGCTTGACCGGCAAGGGCTAG	CTAGCCCTTGCCGGTCAAGCTATCT
2	A3	99	GTTTCCGGTGGTGCTATCATCCACT	GTTTCCGGTGGTGCTATCATCCACT
2	A4	100	AAGACGTAAAGAGGGAAGCCACCGT	ACGGTGGCTTCCCTCTTTACGTCTT
2	A5	101	GGGTAGTACGTGTCCTGATGGTTCC	GGGTAGTACGTGTCCTGATGGTTCC
2	A6	102	TGGGCAACATACATCGGGAAACTGC	GCAGTTTCCCGATGTATGTTGCCCA
2	A7	103	GGGCTTTGCTGCATCAGTGCATAGT	GGGCTTTGCTGCATCAGTGCATAGT
2	A8	104	GGACCCTGCCAGTACACAATATGCC	GGCATATTGTGTACTGGCAGGGTCC
2	A9	105	CTTCATTGGTCTGGTGTCCTAGCGT	CTTCATTGGTCTGGTGTCCTAGCGT
2	A10	106	AGAGACGTGAGGACCACTCGCTCAA	TTGAGCGAGTGGTCCTCACGTCTCT
2	A11	107	ATTGTCGCCTCGTGTTGGTGTGTCA	ATTGTCGCCTCGTGTTGGTGTGTCA
2	A12	108	TGATGGACCCAGCGACATCAGGATC	GATCCTGATGTCGCTGGGTCCATCA
2	B1	109	TAGTGTTCGCATTGGGTCAGGCACC	TAGTGTTCGCATTGGGTCAGGCACC
2	B2	110	GGGATAATAGCAACCACTCAGGCCT	AGGCCTGAGTGGTTGCTATTATCCC
2	B3	111	TCCTTTTATGGTTGGGTCTGTGCCA	TCCTTTTATGGTTGGGTCTGTGCCA
2	B4	112	GAGGGGCGCCTGTAGAGCTCATATG	CATATGAGCTCTACAGGCGCCCCTC
2	B5	113	GTGTAGGCACCGTTGCGCAGTTAGT	GTGTAGGCACCGTTGCGCAGTTAGT
2	B6	114	AGAGATACCACCCGGGTCTTAGGAC	GTCCTAAGACCCGGGTGGTATCTCT
2	B7	115	GGCTCGGTTCACGCTAGGTGTGTTA	GGCTCGGTTCACGCTAGGTGTGTTA
2	B8	116	TAAACACCCGCGGGAGCTCTAACAG	CTGTTAGAGCTCCCGCGGGTGTTTA
2	B9	117	CATCAGGTGGGAGTGGTTCCTCTGA	CATCAGGTGGGAGTGGTTCCTCTGA
2	B10	118	GGCGCGCAGAATAAGAGCCCTAAAC	GTTTAGGGCTCTTATTCTGCGCGCC
2	B11	119	GTACCCTGTGTGGGAAGGTGCTCTA	GTACCCTGTGTGGGAAGGTGCTCTA
2	B12	120	GCGCATAACCGGGACCAAGAACCTA	TAGGTTCTTGGTCCCGGTTATGCGC
2	C1	121	GGGTCGGGGTACTCCGCTCTTATAC	GGGTCGGGGTACTCCGCTCTTATAC
2	C2	122	GTACGGGACACCCGCTGTAACACAG	CTGTGTTACAGCGGGTGTCCCGTAC
2	C3	123	GTGCTGTTCGAGGGTCGGTACTCAC	GTGCTGTTCGAGGGTCGGTACTCAC
2	C4	124	CGAGGTAGGCATCCCTCCAGAGACA	TGTCTCTGGAGGGATGCCTACCTCG
2	C5	125	GCTGTTTGCTTGGCTCATGTCTCAT	GCTGTTTGCTTGGCTCATGTCTCAT
2	C6	126	TGCCAAACAGGGGTACGCTCCATAC	GTATGGAGCGTACCCCTGTTTGGCA
2	C7	127	CGCCCTATTAGGGTGAGTCCCGTAC	CGCCCTATTAGGGTGAGTCCCGTAC
2	C8	128	GGCACCATGGGCCTTACAGCACTAA	TTAGTGCTGTAAGGCCCATGGTGCC
2	C9	129	GGTTCGCTCTATCTTTTGCTTTCCC	GGTTCGCTCTATCTTTTGCTTTCCC
2	C10	130	AAGGGCGGAGGCCTCTAAAACTATG	CATAGTTTTAGAGGCCTCCGCCCTT
2	C11	131	GTTGGCTAGCGACGTAGGCCCTTTT	GTTGGCTAGCGACGTAGGCCCTTTT
2	C12	132	CACTCCGAGGGAGAACGATCTCAGC	GCTGAGATCGTTCTCCCTCGGAGTG
2	D1	133	TTAGCCACTGGGCTGTTTCCCTACA	TTAGCCACTGGGCTGTTTCCCTACA
2	D2	134	TGCAGCGAAGAGACTCTCAGGAGAA	TTCTCCTGAGAGTCTCTTCGCTGCA
2	D3	135	ACTCCAGGGCTTCTCGTTCACTCAG	ACTCCAGGGCTTCTCGTTCACTCAG
2	D4	136	GTGGGGACACCTTATGGACCTGAAG	CTTCAGGTCCATAAGGTGTCCCCAC
2	D5	137	AGTTCTTTGTTGCTCGGTCGCGTGT	AGTTCTTTGTTGCTCGGTCGCGTGT
2	D6	138	GAAGGTGCCAGGATCAACTACAAGC	GCTTGTAGTTGATCCTGGCACCTTC
2	D7	139	TTTGGGTCTGCTCACTAGCCGGTAC	TTTGGGTCTGCTCACTAGCCGGTAC
2	D8	140	AGACTAAACCCGACCTAGAGACGCG	CGCGTCTCTAGGTCGGGTTTAGTCT
2	D9	141	TTATTTCGGCAGCCTGGTCAGGGTT	TTATTTCGGCAGCCTGGTCAGGGTT
2	D10	142	GCGAACGCTATGCGGAGACCGATAC	GTATCGGTCTCCGCATAGCGTTCGC
2	D11	143	GCATGGAATTCTTGCCCCATGCCTC	GCATGGAATTCTTGCCCCATGCCTC
2	D12	144	AACTAGGGCTCAAACTCTACAGCGC	GCGCTGTAGAGTTTGAGCCCTAGTT
2	E1	145	GAGGTTTTGCGCCCAGTGTCATGTT	GAGGTTTTGCGCCCAGTGTCATGTT
2	E2	146	ACAACCCGAGGGGTAGGCTAACTTC	GAAGTTAGCCTACCCCTCGGGTTGT
2	E3	147	GGTAGTCATGGCTCGTCACCTAGTT	GGTAGTCATGGCTCGTCACCTAGTT
2	E4	148	ATAGGGGTAAGACCACGTACCCCGA	TCGGGGTACGTGGTCTTACCCCTAT
2	E5	149	AGTATCCGTAGCGTTCCCGCTACCA	AGTATCCGTAGCGTTCCCGCTACCA
2	E6	150	GATAAGACCCGGCTGAAGCACCTAG	CTAGGTGCTTCAGCCGGGTCTTATC
2	E7	151	GCTTTACTTGCCTGCGGGCTAGTTT	GCTTTACTTGCCTGCGGGCTAGTTT
2	E8	152	GAAAAGATAGTAGCTACCCGGCCCC	GGGGCCGGGTAGCTACTATCTTTTC
2	E9	153	GGATAGTGTAACCTCTGCAGCCCCA	GGATAGTGTAACCTCTGCAGCCCCA
2	E10	154	AGGTAGGGTACCTGCGGATCAGAAG	CTTCTGATCCGCAGGTACCCTACCT
2	E11	155	TAGTATTCTCGCCAGGCCCTGAGTT	TAGTATTCTCGCCAGGCCCTGAGTT
2	E12	156	ATAGCTGGTGGGCACCCTACAAAGT	ACTTTGTAGGGTGCCCACCAGCTAT
2	F1	157	TTAGGGGTCTGGGCTGCCGCATATA	TTAGGGGTCTGGGCTGCCGCATATA
2	F2	158	ACTGGTCCGGCACTACCGAGATACT	AGTATCTCGGTAGTGCCGGACCAGT
2	F3	159	GGTAGACTTTCCGTAGCTGCCGCAG	GGTAGACTTTCCGTAGCTGCCGCAG
2	F4	160	GATGCCGAAGAGCGGAGGCTAGTAT	ATACTAGCCTCCGCTCTTCGGCATC
2	F5	161	CTAGGGGTAGAGTTTTCTCCCAGCA	CTAGGGGTAGAGTTTTCTCCCAGCA
2	F6	162	CCTAGGGAAGGAGGATTAGCAGAGA	TCTCTGCTAATCCTCCTTCCCTAGG
2	F7	163	TGTCCCTAGCCAATGTATGGTCCCA	TGTCCCTAGCCAATGTATGGTCCCA
2	F8	164	GGTACTGCCTAACCGCTCAGTGACC	GGTCACTGAGCGGTTAGGCAGTACC
2	F9	165	AGCCCAGCCCCAGTATCTTCAGAAG	AGCCCAGCCCCAGTATCTTCAGAAG
2	F10	166	GGATGGAACGCTACCACGGTACTAC	GTAGTACCGTGGTAGCGTTCCATCC
2	F11	167	GCCACTACTCCGGCTTAGCTTTGGA	GCCACTACTCCGGCTTAGCTTTGGA
2	F12	168	GAAGCCGCTAGAGCATCCCAAGACT	AGTCTTGGGATGCTCTAGCGGCTTC
2	G1	169	GTCGTCTGAGTCACGGGTAGAGCTC	GTCGTCTGAGTCACGGGTAGAGCTC
2	G2	170	GCAGACAAAGGACTAGGCTCCCTAT	ATAGGGAGCCTAGTCCTTTGTCTGC
2	G3	171	CTCTGGAATGTAGGCCTGTGCTGCT	CTCTGGAATGTAGGCCTGTGCTGCT
2	G4	172	AGAAACCGCGAGGCTCCCTAATAGC	GCTATTAGGGAGCCTCGCGGTTTCT
2	G5	173	CCTCAGTGTCCGTAGTAAGTCCTCT	CCTCAGTGTCCGTAGTAAGTCCTCT
2	G6	174	ACTGACAGTGGCCAGGAATGATCCA	TGGATCATTCCTGGCCACTGTCAGT
2	G7	175	ATAGGCGTTCCCGCTGTACAGGCTA	ATAGGCGTTCCCGCTGTACAGGCTA
2	G8	176	TGGTCGGACACTTGAGAGCACTGAC	GTCAGTGCTCTCAAGTGTCCGACCA
2	G9	177	GTTAGATGAGTTCACCCAGGCCTGT	GTTAGATGAGTTCACCCAGGCCTGT
2	G10	178	CTGGGGTGCACCCCAAGAAACAATC	GATTGTTTCTTGGGGTGCACCCCAG
2	G11	179	GTACTCACAGCTTGTCCGGTGTCTT	GTACTCACAGCTTGTCCGGTGTCTT
2	G12	180	TGCACAAGGGGTAAGACTCTAAGAC	GTCTTAGAGTCTTACCCCTTGTGCA
2	H1	181	CCAGCATTGTCTCCACGCCTTAGTT	CCAGCATTGTCTCCACGCCTTAGTT
2	H2	182	GGAGGGTACAATCCACAACTGGACA	TGTCCAGTTGTGGATTGTACCCTCC
2	H3	183	GCTGATTCCTGCAAAGGTCTCCTCC	GCTGATTCCTGCAAAGGTCTCCTCC
2	H4	184	GTACCAGCTGCCTCACGACTAAGAC	GTCTTAGTCGTGAGGCAGCTGGTAC
2	H5	185	GGCGATATAGAGGTGTTCTCGCCCC	GGCGATATAGAGGTGTTCTCGCCCC
2	H6	186	AACAGAGCGCCTGATATCTAGCGGC	GCCGCTAGATATCAGGCGCTCTGTT
2	H7	187	GTTTTCGCTGGCTCTCGCTTGGTTA	GTTTTCGCTGGCTCTCGCTTGGTTA
2	H8	188	TGGACTCCTTGGGACCATAGAAGCT	AGCTTCTATGGTCCCAAGGAGTCCA
2	H9	189	GGTAGGTTATATGGCCCTGGCGCTA	GGTAGGTTATATGGCCCTGGCGCTA
2	H10	190	GAACTAACACGGAGCGTACGCGGAG	CTCCGCGTACGCTCCGTGTTAGTTC
2	H11	191	CTACCCTTGGGTCTCCCGTTTATCA	CTACCCTTGGGTCTCCCGTTTATCA
2	H12	192	ATGACAGGGCCCAATAAGACACACG	CGTGTGTCTTATTGGGCCCTGTCAT
3	A1	193	GTCAGCATGGGTCGTTAGCCACACT	GTCAGCATGGGTCGTTAGCCACACT
3	A2	194	GACGACCACTGTTAGCGACACACCC	GGGTGTGTCGCTAACAGTGGTCGTC
3	A3	195	AGTGGCACGTCAGGCTCCGTAGTAT	AGTGGCACGTCAGGCTCCGTAGTAT
3	A4	196	TACCGGTAATAAAGAGGAGGCCCGG	CCGGGCCTCCTCTTTATTACCGGTA
3	A5	197	TAGTTAAGCTGGCCCCACTACCCTC	TAGTTAAGCTGGCCCCACTACCCTC
3	A6	198	GGGCACCCGAAATGTAGATGGACGA	TCGTCCATCTACATTTCGGGTGCCC
3	A7	199	GTTTGGCAGGGATGGGTGTCTCAGA	GTTTGGCAGGGATGGGTGTCTCAGA
3	A8	200	TCAAATAGAAGGGAGCTGACACCAC	GTGGTGTCAGCTCCCTTCTATTTGA
3	A9	201	AGCTGTTGGTTTATCCGCGCCTCTA	AGCTGTTGGTTTATCCGCGCCTCTA
3	A10	202	CCCACGGGGCAGTACTAACCTAGAT	ATCTAGGTTAGTACTGCCCCGTGGG
3	A11	203	CTTTGCCTAATCGGGTGCTCTCCTC	CTTTGCCTAATCGGGTGCTCTCCTC
3	A12	204	GACGGTAGGTAAGCCCACCAGGATA	TATCCTGGTGGGCTTACCTACCGTC
3	B1	205	GTGGCTAGCTCCGCTCATACTTCTA	GTGGCTAGCTCCGCTCATACTTCTA
3	B2	206	GGGAAGTCTCGACTCAGGACTAGCT	AGCTAGTCCTGAGTCGAGACTTCCC
3	B3	207	GATACCCTGAGTGTACCCAGGTCGT	GATACCCTGAGTGTACCCAGGTCGT
3	B4	208	AAGGACGCTGGCTCGTATAGACCAC	GTGGTCTATACGAGCCAGCGTCCTT
3	B5	209	TGTCTTTTCCTAGCATCTCCCCACG	TGTCTTTTCCTAGCATCTCCCCACG
3	B6	210	GCATCCGACAAGCCCAAGTAGGGAA	TTCCCTACTTGGGCTTGTCGGATGC
3	B7	211	GGGGATTTCTGCCCACATAGCGTGT	GGGGATTTCTGCCCACATAGCGTGT
3	B8	212	TAGCACTGGAGCAGGGCCTTAAAAG	CTTTTAAGGCCCTGCTCCAGTGCTA
3	B9	213	GCCACGTTTCTTGGGCTATGTCAGT	GCCACGTTTCTTGGGCTATGTCAGT
3	B10	214	GAAAGAGTAGCTGGGCCTTGACGCT	AGCGTCAAGGCCCAGCTACTCTTTC
3	B11	215	GTCCCATCAGGGCGTTTACGTACCA	GTCCCATCAGGGCGTTTACGTACCA
3	B12	216	GAAGCGACGGACCGATCACTCTACC	GGTAGAGTGATCGGTCCGTCGCTTC
3	C1	217	GCACTATGGGGTCAGGGAGTGGTTT	GCACTATGGGGTCAGGGAGTGGTTT
3	C2	218	AAAACAGGGAGCACTAACTCGCCAG	CTGGCGAGTTAGTGCTCCCTGTTTT
3	C3	219	GTTACACCTTGGCTCACCTCTGCTG	GTTACACCTTGGCTCACCTCTGCTG
3	C4	220	GGAGCTACACAGAGTCGACTAGCTC	GAGCTAGTCGACTCTGTGTAGCTCC
3	C5	221	CTATCATTGGTCCCGCCAGGCTGAT	CTATCATTGGTCCCGCCAGGCTGAT
3	C6	222	AACATTATCGAGGGGACACACGGCC	GGCCGTGTGTCCCCTCGATAATGTT
3	C7	223	TGCGCTTCTATCTACCCTGTCTCCG	TGCGCTTCTATCTACCCTGTCTCCG
3	C8	224	ACACCTGAAGGGGAGTAGCATACTA	TAGTATGCTACTCCCCTTCAGGTGT
3	C9	225	GCCGGTTGGTTCCTCATATTTGCGC	GCCGGTTGGTTCCTCATATTTGCGC
3	C10	226	ACTCGGAGGCGCTACTAAACGACTC	GAGTCGTTTAGTAGCGCCTCCGAGT
3	C11	227	GCATCCATACCATGCCCATGGTGTT	GCATCCATACCATGCCCATGGTGTT
3	C12	228	GAATATGCGAACGGGAACTGGACGC	GCGTCCAGTTCCCGTTCGCATATTC
3	D1	229	TATGTGTACTCAGGTCCTCGGCAGC	TATGTGTACTCAGGTCCTCGGCAGC
3	D2	230	AAGCAGCGGTAAGCCCTAACGACAG	CTGTCGTTAGGGCTTACCGCTGCTT
3	D3	231	TCCTTGTGGTGGGTGCTTCCTATAT	TCCTTGTGGTGGGTGCTTCCTATAT
3	D4	232	TCGGGACAGAGGGATACGTACACTC	GAGTGTACGTATCCCTCTGTCCCGA
3	D5	233	GCCATCTGACCTTCTACGCCATCCA	GCCATCTGACCTTCTACGCCATCCA
3	D6	234	GATCACCCACGCGACACAGATAGGG	CCCTATCTGTGTCGCGTGGGTGATC
3	D7	235	GTGTGAGCTTAGTCTAAGGCCAGCC	GTGTGAGCTTAGTCTAAGGCCAGCC
3	D8	236	TAGCATGATGCGAGCCACCAGGATC	GATCCTGGTGGCTCGCATCATGCTA
3	D9	237	GGCTCTGGTTGGTTACGCTCCTTTA	GGCTCTGGTTGGTTACGCTCCTTTA
3	D10	238	AAGCTGCTTGGGTCCTACACAGCAC	GTGCTGTGTAGGACCCAAGCAGCTT
3	D11	239	CGAGTCTCTCCCCTGAGTAGTTCAG	CGAGTCTCTCCCCTGAGTAGTTCAG
3	D12	240	TGGGGCCATCAAGACCATATGGACA	TGTCCATATGGTCTTGATGGCCCCA
3	E1	241	AGTGTTCCGTACGGGACCTCCAGTT	AGTGTTCCGTACGGGACCTCCAGTT
3	E2	242	TACAGTGCACGAACCAACAACAGGC	GCCTGTTGTTGGTTCGTGCACTGTA
3	E3	243	AGAGCTTGCACGTGAGTCTCCCAGA	AGAGCTTGCACGTGAGTCTCCCAGA
3	E4	244	GAACCCATGGGGCGAACAGCTAAAA	TTTTAGCTGTTCGCCCCATGGGTTC
3	E5	245	ATGGTGGCTAGCCTGAGTTCTACCT	ATGGTGGCTAGCCTGAGTTCTACCT
3	E6	246	ACATCTGGGACCGACCGAAGCTAAG	CTTAGCTTCGGTCGGTCCCAGATGT
3	E7	247	GGCGTCTAGCCTAAGCGTTAGTCCA	GGCGTCTAGCCTAAGCGTTAGTCCA
3	E8	248	TAGGTAACCACCCCTGGGGCATAAT	ATTATGCCCCAGGGGTGGTTACCTA
3	E9	249	GAGAGTTAGCAGCTCGGCCTTATCC	GAGAGTTAGCAGCTCGGCCTTATCC
3	E10	250	GACATCACCTAGAGGGGCATATGGA	TCCATATGCCCCTCTAGGTGATGTC
3	E11	251	ATGAGCTAGGCTCCAGATCGGTGCT	ATGAGCTAGGCTCCAGATCGGTGCT
3	E12	252	TACCCGCTGCGACAAGAGAAACTCC	GGAGTTTCTCTTGTCGCAGCGGGTA
3	F1	253	TTGTTCCAGGTCAGCTGGCCACATA	TTGTTCCAGGTCAGCTGGCCACATA
3	F2	254	AAAAGACCGGAGATGAAAGCTGCAC	GTGCAGCTTTCATCTCCGGTCTTTT
3	F3	255	TGTCTTGGGTCCTCTTACGGTGTGG	TGTCTTGGGTCCTCTTACGGTGTGG
3	F4	256	TGTCAGCCTGACCTCCTAGCTGGAT	ATCCAGCTAGGAGGTCAGGCTGACA
3	F5	257	GGTTGCTAGCGCCGAGTCATAGCTT	GGTTGCTAGCGCCGAGTCATAGCTT
3	F6	258	GGAAGGACTCAATGTAGGGCGCATC	GATGCGCCCTACATTGAGTCCTTCC
3	F7	259	AGAAGGTTTGTCCCCTGTTCCGCTA	AGAAGGTTTGTCCCCTGTTCCGCTA
3	F8	260	AGGCCGCGGGCCACCTATAATACTA	TAGTATTATAGGTGGCCCGCGGCCT
3	F9	261	GTGTGGCTCATTGCTGCCGTATCAT	GTGTGGCTCATTGCTGCCGTATCAT
3	F10	262	GTTGGGAGAGGCCGGACTAGCAATA	TATTGCTAGTCCGGCCTCTCCCAAC
3	F11	263	TACGTTTGAGTGGCTAGCCCCTTGT	TACGTTTGAGTGGCTAGCCCCTTGT
3	F12	264	ACTGGTGACGGACTAGATCCAGACA	TGTCTGGATCTAGTCCGTCACCAGT
3	G1	265	AAGTGCCTTGGTGGCATGTTCAGCT	AAGTGCCTTGGTGGCATGTTCAGCT
3	G2	266	CGACATCTAAGAGAGGACCCCAAGC	GCTTGGGGTCCTCTCTTAGATGTCG
3	G3	267	GTGTCTTAGTATCTGCCTACCAGCT	GTGTCTTAGTATCTGCCTACCAGCT
3	G4	268	CAGGGGCCTCTCATGACAGGACATA	TATGTCCTGTCATGAGAGGCCCCTG
3	G5	269	GTGTGGTTTCCGCTGTACGGTCTGA	GTGTGGTTTCCGCTGTACGGTCTGA
3	G6	270	GGAACCCTATCACCTCCCCGGTACT	AGTACCGGGGAGGTGATAGGGTTCC
3	G7	271	CCATTGCGTCCGAGTCTGACTCCTC	CCATTGCGTCCGAGTCTGACTCCTC
3	G8	272	TAGTAGCGCGAGACTGCAGACCACA	TGTGGTCTGCAGTCTCGCGCTACTA
3	G9	273	TTATGTTGGGGCAGTCCCGTTCTCG	TTATGTTGGGGCAGTCCCGTTCTCG
3	G10	274	GGGGAGTACTCTACCGGTCAGAAAC	GTTTCTGACCGGTAGAGTACTCCCC
3	G11	275	GATCCTCTATTTCGGGCCTGCTCTG	GATCCTCTATTTCGGGCCTGCTCTG
3	G12	276	GAACATCCCTGACACCCGGACCTAT	ATAGGTCCGGGTGTCAGGGATGTTC
3	H1	277	CCTGTGGTCTCAGGTCAGTACGTCG	CCTGTGGTCTCAGGTCAGTACGTCG
3	H2	278	AGACACGTCGAGAACTGAGGCAGTC	GACTGCCTCAGTTCTCGACGTGTCT
3	H3	279	TGGGTATCCGTGTTTGTTCGCCGTC	TGGGTATCCGTGTTTGTTCGCCGTC
3	H4	280	AAAGAGAGTCCTACCGGGACGACGA	TCGTCGTCCCGGTAGGACTCTCTTT
3	H5	281	GTGATCATGGATGCAGGCTCTTCCC	GTGATCATGGATGCAGGCTCTTCCC
3	H6	282	ATAGAGGGACTAGCCCCAATCTAGG	CCTAGATTGGGGCTAGTCCCTCTAT
3	H7	283	CTAGTTTCTGGGCTAGCTGTTCGCT	CTAGTTTCTGGGCTAGCTGTTCGCT
3	H8	284	GCAAAAGAAGACCGCCCAGACAACG	CGTTGTCTGGGCGGTCTTCTTTTGC
3	H9	285	CCCGGTTTCCCCGAGTTACCACTAT	CCCGGTTTCCCCGAGTTACCACTAT
3	H10	286	ATAGAAGAGACGATGCGGTGAGAGC	GCTCTCACCGCATCGTCTCTTCTAT
3	H11	287	TGGCCTGCCTAGCGTTCATCCTATG	TGGCCTGCCTAGCGTTCATCCTATG
3	H12	288	GCCTCAAAACCGGAAGACCCTACTG	CAGTAGGGTCTTCCGGTTTTGAGGC
4	A1	289	TCGAGCTATGCCCTTAGTCTTCCTC	TCGAGCTATGCCCTTAGTCTTCCTC
4	A2	290	GAGGCTTCTGGCTCCTACTCTAGCC	GGCTAGAGTAGGAGCCAGAAGCCTC
4	A3	291	CGCGGCGGTTCTGTATCCTATTCCC	CGCGGCGGTTCTGTATCCTATTCCC
4	A4	292	GGCCCCTAGCCCGCTAGAACAATAT	ATATTGTTCTAGCGGGCTAGGGGCC
4	A5	293	CTGGTGTAGTTAGGACGGTCCTCGC	CTGGTGTAGTTAGGACGGTCCTCGC
4	A6	294	AGGCTAGGGCCGCCTACAAATAAGT	ACTTATTTGTAGGCGGCCCTAGCCT
4	A7	295	ACAGAGCCCGTTGGCCCCTATTTAG	ACAGAGCCCGTTGGCCCCTATTTAG
4	A8	296	GGCCCGAGGAGATCGAACAAACCAT	ATGGTTTGTTCGATCTCCTCGGGCC
4	A9	297	CCGATCTATGCCTGCTGTCAGACCC	CCGATCTATGCCTGCTGTCAGACCC
4	A10	298	AGGCGAAATGACATAGCGCTGGAAC	GTTCCAGCGCTATGTCATTTCGCCT
4	A11	299	CATCAAGGATCCCTTCCCTCGGTCA	CATCAAGGATCCCTTCCCTCGGTCA
4	A12	300	TACACAAGGGACGGAGGCGTATGAA	TTCATACGCCTCCGTCCCTTGTGTA
4	B1	301	CCCGAGGGGCCCTTGTCTCAATATC	CCCGAGGGGCCCTTGTCTCAATATC
4	B2	302	GAAGACCCGACCGGCGGACATAAAT	ATTTATGTCCGCCGGTCGGGTCTTC
4	B3	303	GGTCTTGATGTAGTGCCGCCGAGTT	GGTCTTGATGTAGTGCCGCCGAGTT
4	B4	304	ATGCAGGGGAACCCCTACTTAACCT	AGGTTAAGTAGGGGTTCCCCTGCAT
4	B5	305	GCGTTGCTGACTGGGCATCCTATGT	GCGTTGCTGACTGGGCATCCTATGT
4	B6	306	ACTATCTGAACCACGCCAGGAACCT	AGGTTCCTGGCGTGGTTCAGATAGT
4	B7	307	CCCTTACTGTGCTGAGGGTAGCGTT	CCCTTACTGTGCTGAGGGTAGCGTT
4	B8	308	GTGGGAGTAAGGGCCCACATGTACA	TGTACATGTGGGCCCTTACTCCCAC
4	B9	309	TTGCGTTCAGGTTGCCTTGACCCTA	TTGCGTTCAGGTTGCCTTGACCCTA
4	B10	310	GAGCTGGAATGCTGTCAGCGAGACA	TGTCTCGCTGACAGCATTCCAGCTC
4	B11	311	GTTCATCGGTGGATCGGGGTCCTAC	GTTCATCGGTGGATCGGGGTCCTAC
4	B12	312	ATAGCAACGGGTGTACCAAAGCCCC	GGGGCTTTGGTACACCCGTTGCTAT
4	C1	313	GTCGCCCATGCTCTCGACCTACTTG	GTCGCCCATGCTCTCGACCTACTTG
4	C2	314	CCACAGAATACTAGCGTGGCAGGCT	AGCCTGCCACGCTAGTATTCTGTGG
4	C3	315	AGGATCAGAGGGAGGGTCCCCTTAT	AGGATCAGAGGGAGGGTCCCCTTAT
4	C4	316	AAGAGGAACCGCTTAAGAGGAGGAA	TTCCTCCTCTTAAGCGGTTCCTCTT
4	C5	317	GTCTCCCGCCGCACAGTCTCTAATG	GTCTCCCGCCGCACAGTCTCTAATG
4	C6	318	GGTGGGTACTGGAGGCTAGTCTCTG	CAGAGACTAGCCTCCAGTACCCACC
4	C7	319	GCATGTACAGCCCGTGCACTGGTAT	GCATGTACAGCCCGTGCACTGGTAT
4	C8	320	ACCACGGAACAAGGGTCAGCCTAAA	TTTAGGCTGACCCTTGTTCCGTGGT
4	C9	321	TTCTGTTCGGAGTGCGGCTTATCCC	TTCTGTTCGGAGTGCGGCTTATCCC
4	C10	322	AAGGTGCGCACCAAACAGAGACCTA	TAGGTCTCTGTTTGGTGCGCACCTT
4	C11	323	GTTAAGCAGTCCATCGCCGCTAGGT	GTTAAGCAGTCCATCGCCGCTAGGT
4	C12	324	AGAAACTGGTACGCGAGACAGCTAC	GTAGCTGTCTCGCGTACCAGTTTCT
4	D1	325	GAGAGTGCCCTTTTGCATCCTAGTC	GAGAGTGCCCTTTTGCATCCTAGTC
4	D2	326	AACAGGCGACCACCAGAGTGAGTAA	TTACTCACTCTGGTGGTCGCCTGTT
4	D3	327	GTTTGTTGCCGCCCTTAGTCTGACA	GTTTGTTGCCGCCCTTAGTCTGACA
4	D4	328	TCCCGAGAAACTGGCTGAAACCACG	CGTGGTTTCAGCCAGTTTCTCGGGA
4	D5	329	GTTAGGGCTTGAGCGTATGCCATCC	GTTAGGGCTTGAGCGTATGCCATCC
4	D6	330	ACACTGCCCAGGGAGGCTCTTAATC	GATTAAGAGCCTCCCTGGGCAGTGT
4	D7	331	GAGGTGGTATTAGCTCGCCAGAGCT	GAGGTGGTATTAGCTCGCCAGAGCT
4	D8	332	CGGTGGAACAGCGACTAAGAGTGAC	GTCACTCTTAGTCGCTGTTCCACCG
4	D9	333	TATGCTTCCCGAGTTCGGTTCCGTC	TATGCTTCCCGAGTTCGGTTCCGTC
4	D10	334	TGAGAAGCTACGAACCTCACCCGCT	AGCGGGTGAGGTTCGTAGCTTCTCA
4	D11	335	TCTGTATGTGCCATGTCTTCCCAGG	TCTGTATGTGCCATGTCTTCCCAGG
4	D12	336	GAGCAGACACCTACCAAGGAAAACA	TGTTTTCCTTGGTAGGTGTCTGCTC
4	E1	337	CCACTCTGTATCCTACTCTGGTCGC	CCACTCTGTATCCTACTCTGGTCGC
4	E2	338	GAGGCGATATACCTGGGCGACCTAT	ATAGGTCGCCCAGGTATATCGCCTC
4	E3	339	TCATCTACTGCCTGTCCATTGCCGG	TCATCTACTGCCTGTCCATTGCCGG
4	E4	340	ACGGGAGTCATGAAAGCACCCAACT	AGTTGGGTGCTTTCATGACTCCCGT
4	E5	341	GACTCAGCCGCTACCGTAGTCTCTT	GACTCAGCCGCTACCGTAGTCTCTT
4	E6	342	ACCAAAGGATACTACCCCAGGCATG	CATGCCTGGGGTAGTATCCTTTGGT
4	E7	343	CGTTCTCCAGGGTTCGTGCTACAGT	CGTTCTCCAGGGTTCGTGCTACAGT
4	E8	344	GCACAGGCTGCGCCTAGCTATGAAT	ATTCATAGCTAGGCGCAGCCTGTGC
4	E9	345	GTCGGACTTCCCTAGACTTTAGCCC	GTCGGACTTCCCTAGACTTTAGCCC
4	E10	346	CCCCTAAGGGAAAGGGTCAAAGACA	TGTCTTTGACCCTTTCCCTTAGGGG
4	E11	347	GTCATTGCTACCGGCCTCGTAGTGG	GTCATTGCTACCGGCCTCGTAGTGG
4	E12	348	GGTAAGATGACCGGCCGAGTGCTAG	CTAGCACTCGGCCGGTCATCTTACC
4	F1	349	CGTCTGTCATTCGCCCGTTATTCCC	CGTCTGTCATTCGCCCGTTATTCCC
4	F2	350	CTGTAGGAGCATACCAGCCCTGCTC	GAGCAGGGCTGGTATGCTCCTACAG
4	F3	351	GTAGGGTCCGCCTTCGCATCATTGA	GTAGGGTCCGCCTTCGCATCATTGA
4	F4	352	TGAGTCACGACGAAGAAACCAGGAC	GTCCTGGTTTCTTCGTCGTGACTCA
4	F5	353	TTGAGTCTATTGTGTGCCGGTCCCA	TTGAGTCTATTGTGTGCCGGTCCCA
4	F6	354	AACGGCACTCTCCATAAGCTGAGGG	CCCTCAGCTTATGGAGAGTGCCGTT
4	F7	355	GGGAAGGCTTGTGTATCCACCTCCA	GGGAAGGCTTGTGTATCCACCTCCA
4	F8	356	CTCTCCCCACACCACACTGAGAAGA	TCTTCTCAGTGTGGTGTGGGGAGAG
4	F9	357	ATTGCCTTTTCCCTGAGCATGGTGC	ATTGCCTTTTCCCTGAGCATGGTGC
4	F10	358	GTAGCACTAGGGCTCCAACAAAGCT	AGCTTTGTTGGAGCCCTAGTGCTAC
4	F11	359	TATTCTATAGGTCGTCCCCGTCCCA	TATTCTATAGGTCGTCCCCGTCCCA
4	F12	360	CCAAGGCGGGAAACCGACTAGTAAC	GTTACTAGTCGGTTTCCCGCCTTGG
4	G1	361	GTCTCGGAGTCCCGTATGGCAAGTC	GTCTCGGAGTCCCGTATGGCAAGTC
4	G2	362	GGAGGATGGCTCCAGTTAGGAAGCA	TGCTTCCTAACTGGAGCCATCCTCC
4	G3	363	GGTAGGCCAGGGTTCTTTTAGGTGA	GGTAGGCCAGGGTTCTTTTAGGTGA
4	G4	364	CACCAGAAGGGAAGGATTGAACCCT	AGGGTTCAATCCTTCCCTTCTGGTG
4	G5	365	CGGGTCTGTAGTTTTAAGGTGCCCC	CGGGTCTGTAGTTTTAAGGTGCCCC
4	G6	366	TGGCTACCGAGCAAAAGGCACAGTA	TACTGTGCCTTTTGCTCGGTAGCCA
4	G7	367	GCATTTGTTCGTACCCTAGCCCATC	GCATTTGTTCGTACCCTAGCCCATC
4	G8	368	CTGGGCCTAAGAGTGTGCCAGAGAT	ATCTCTGGCACACTCTTAGGCCCAG
4	G9	369	AGTCTGGTCTTTGCAGGGATTTCCT	AGTCTGGTCTTTGCAGGGATTTCCT
4	G10	370	AGCAACAGTCGTAGGAGAATGCCCC	GGGGCATTCTCCTACGACTGTTGCT
4	G11	371	TGATGTGTCCGCCGGTTAGTCCTTT	TGATGTGTCCGCCGGTTAGTCCTTT
4	G12	372	GCCATGCTGCTACTGAAAGACCACG	CGTGGTCTTTCAGTAGCAGCATGGC
4	H1	373	GTGTATGCGTTTCCGGCTGTTGCTT	GTGTATGCGTTTCCGGCTGTTGCTT
4	H2	374	ATGGCTGGTAGAGTGAACAAGGCGA	TCGCCTTGTTCACTCTACCAGCCAT
4	H3	375	GCATGTTAGTCTCCCTTAGTGTTGC	GCATGTTAGTCTCCCTTAGTGTTGC
4	H4	376	TCTAAACGGGCAACGACATGAGGAC	GTCCTCATGTCGTTGCCCGTTTAGA
4	H5	377	GTCGTCGGGAACCTCCTATCGTCCA	GTCGTCGGGAACCTCCTATCGTCCA
4	H6	378	GACTCCTACGAGGCTGACAATACCC	GGGTATTGTCAGCCTCGTAGGAGTC
4	H7	379	GTAGAGCCCTACCATGCCCACTTTT	GTAGAGCCCTACCATGCCCACTTTT
4	H8	380	GTGGACTTAGCTGCAGGGCGACAAT	ATTGTCGCCCTGCAGCTAAGTCCAC
4	H9	381	GTTGCTAGGCGCGTCAGATCAGGTT	GTTGCTAGGCGCGTCAGATCAGGTT
4	H10	382	AAAAGATCCTGCGCCCAACGGAGAG	CTCTCCGTTGGGCGCAGGATCTTTT
4	H11	383	GTTTATCTTGGTTTGGCGCAGTGCC	GTTTATCTTGGTTTGGCGCAGTGCC
4	H12	384	AGCTGACAGTAGGTCTCCCCAGACG	CGTCTGGGGAGACCTACTGTCAGCT
5	A1	385	GGGTGGATCTTCACGGGCCTATTCT	GGGTGGATCTTCACGGGCCTATTCT
5	A2	386	ACATGGTAGGTAAGACTCCGACCCC	GGGGTCGGAGTCTTACCTACCATGT
5	A3	387	GTGGGCCTCGGTTGGACTATCAGTT	GTGGGCCTCGGTTGGACTATCAGTT
5	A4	388	TGCAGAGAAGGTAACGCCCGTAACC	GGTTACGGGCGTTACCTTCTCTGCA
5	A5	389	AAGGTGCTGTCACTTAGTCCCCGTT	AAGGTGCTGTCACTTAGTCCCCGTT
5	A6	390	GTACGCCCTATGGCTGGGATGACAA	TTGTCATCCCAGCCATAGGGCGTAC
5	A7	391	GATTCTAGCGCCTCTGGTCACCTGA	GATTCTAGCGCCTCTGGTCACCTGA
5	A8	392	TAACAGACGCCTCGGCCAATAGCAC	GTGCTATTGGCCGAGGCGTCTGTTA
5	A9	393	GTAAGGCCAGGCTCAGTTCTGGTAG	GTAAGGCCAGGCTCAGTTCTGGTAG
5	A10	394	GAGCAAACAAGGCGAGCCCTAAACG	CGTTTAGGGCTCGCCTTGTTTGCTC
5	A11	395	GGTTAGTTGAGTGTACCTTCCCACC	GGTTAGTTGAGTGTACCTTCCCACC
5	A12	396	AGCTAGCAGGAGTGATCCTAGAGCT	AGCTCTAGGATCACTCCTGCTAGCT
5	B1	397	ACTAGGGGTTTTCCCAGTAGCAGTT	ACTAGGGGTTTTCCCAGTAGCAGTT
5	B2	398	TAGAGAGTGCTCCTACGCTGCCTCC	GGAGGCAGCGTAGGAGCACTCTCTA
5	B3	399	GCCCTTTAGTTCGATAGTCCCTCTT	GCCCTTTAGTTCGATAGTCCCTCTT
5	B4	400	GCTAATGACAGGTGAGACGCACCTC	GAGGTGCGTCTCACCTGTCATTAGC
5	B5	401	CTGTTCAGGTAGGCGTTCAGCGGTA	CTGTTCAGGTAGGCGTTCAGCGGTA
5	B6	402	CCGAAAGGGACCGCAAGCTAATAGC	GCTATTAGCTTGCGGTCCCTTTCGG
5	B7	403	GTCCTCTTATTAACTCCCTCCTCGC	GTCCTCTTATTAACTCCCTCCTCGC
5	B8	404	GGCCAAACGCCCGAAGAATACGACT	AGTCGTATTCTTCGGGCGTTTGGCC
5	B9	405	GATCGATGTACTGACCCAGCCCCTC	GATCGATGTACTGACCCAGCCCCTC
5	B10	406	GCAAAGCCCTGCCGACAAGTACTAC	GTAGTACTTGTCGGCAGGGCTTTGC
5	B11	407	ACTACTTATCCCAGCTCCAGGGTTC	ACTACTTATCCCAGCTCCAGGGTTC
5	B12	408	TGACACAATGCGGGGCGAACACTAT	ATAGTGTTCGCCCCGCATTGTGTCA
5	C1	409	TGAGCATGCCGCTAGTTCACCTGTC	TGAGCATGCCGCTAGTTCACCTGTC
5	C2	410	ACTGGTGCCACACCATGGCTACTAA	TTAGTAGCCATGGTGTGGCACCAGT
5	C3	411	GTCCCTAATTGCCTCTCGGATTCCT	GTCCCTAATTGCCTCTCGGATTCCT
5	C4	412	CACACCAACACTCACAGGCCAGATC	GATCTGGCCTGTGAGTGTTGGTGTG
5	C5	413	GTCCATAAGGGTCCCACTCGGTGTA	GTCCATAAGGGTCCCACTCGGTGTA
5	C6	414	CAAAGTACCGCGGGAGACGATGAGG	CCTCATCGTCTCCCGCGGTACTTTG
5	C7	415	AGCGCTCTATCCCGGTGGTGATTTC	AGCGCTCTATCCCGGTGGTGATTTC
5	C8	416	ACGCCAAGAGTGACGTAACCCAACC	GGTTGGGTTACGTCACTCTTGGCGT
5	C9	417	GACGTCGGGTTATACCTCCCAGTGC	GACGTCGGGTTATACCTCCCAGTGC
5	C10	418	TTAGGGACCACTAAGGTCCACACGC	GCGTGTGGACCTTAGTGGTCCCTAA
5	C11	419	GGCTAAAGGTCCTCCGTTTGTCCGT	GGCTAAAGGTCCTCCGTTTGTCCGT
5	C12	420	GTCACAACAGGGGACACTCAGTCAC	GTGACTGAGTGTCCCCTGTTGTGAC
5	D1	421	GAGTACCAGTTGTAGGCCAGGCATC	GAGTACCAGTTGTAGGCCAGGCATC
5	D2	422	CAGAGGGCTACCGCAGGTAGGTTAC	GTAACCTACCTGCGGTAGCCCTCTG
5	D3	423	GCTTCCGTATCCTATGCTAGAGGGC	GCTTCCGTATCCTATGCTAGAGGGC
5	D4	424	GAGCGGGACGTATAGGACTCTACGG	CCGTAGAGTCCTATACGTCCCGCTC
5	D5	425	AGCCTTAGCCGAGGGTGTTATGTCT	AGCCTTAGCCGAGGGTGTTATGTCT
5	D6	426	GCTAGCTACGTAGTGAAGCGCCACC	GGTGGCGCTTCACTACGTAGCTAGC
5	D7	427	GGCTTTCTATAGGCCGCCAGTTTTC	GGCTTTCTATAGGCCGCCAGTTTTC
5	D8	428	GATACTGGTAGGCACCGCGGAGATG	CATCTCCGCGGTGCCTACCAGTATC
5	D9	429	AGCCATCTTCTGCGTGTTGGTTACC	AGCCATCTTCTGCGTGTTGGTTACC
5	D10	430	TCAACTGGAAGGCGGCTAGACAGTA	TACTGTCTAGCCGCCTTCCAGTTGA
5	D11	431	GTGTTGCATGAGCCAGTTCGCTCTG	GTGTTGCATGAGCCAGTTCGCTCTG
5	D12	432	GAAGTACCAAAGCGGGCTAACGGAG	CTCCGTTAGCCCGCTTTGGTACTTC
5	E1	433	GACTCATCGTTTTGCCTGCCCTTGG	GACTCATCGTTTTGCCTGCCCTTGG
5	E2	434	CCCCATATAGAGCGGGCACAGAAAC	GTTTCTGTGCCCGCTCTATATGGGG
5	E3	435	CCTTCTGCCTGCCAGAGGTACTTAC	CCTTCTGCCTGCCAGAGGTACTTAC
5	E4	436	GGAGAGTAATCTAGCCTGCCCAGCT	AGCTGGGCAGGCTAGATTACTCTCC
5	E5	437	AGAGTGCTTGTGCTAGTTCTGCAGC	AGAGTGCTTGTGCTAGTTCTGCAGC
5	E6	438	GACTACATGCAGCTAGGAAGGAAGA	TCTTCCTTCCTAGCTGCATGTAGTC
5	E7	439	TTGGTATCCAGGCCTCCTGTGACAT	TTGGTATCCAGGCCTCCTGTGACAT
5	E8	440	TAGACGGCCCCAAAGACTTCAGAGC	GCTCTGAAGTCTTTGGGGCCGTCTA
5	E9	441	ACTCTAGTCGCGTTGCTTGGTAGGC	ACTCTAGTCGCGTTGCTTGGTAGGC
5	E10	442	TAAGGAACCCGTGCGATACCAGACC	GGTCTGGTATCGCACGGGTTCCTTA
5	E11	443	GGTGCGTGGGTCTCTATATTCCTCA	GGTGCGTGGGTCTCTATATTCCTCA
5	E12	444	AATCGGAGCTCCCAGAGAGATACCC	GGGTATCTCTCTGGGAGCTCCGATT
5	F1	445	AGGGTCGTCATTCTGATGGGCTGTC	AGGGTCGTCATTCTGATGGGCTGTC
5	F2	446	GGACTCTACGGAAGAGCGCTAACCG	CGGTTAGCGCTCTTCCGTAGAGTCC
5	F3	447	GGTATGGTTACCCTTGGTTTCGTCC	GGTATGGTTACCCTTGGTTTCGTCC
5	F4	448	TGCTTGAACACGGCAAAACACAGGC	GCCTGTGTTTTGCCGTGTTCAAGCA
5	F5	449	GGGCCGGTTACTTTATTCAGTGCCT	GGGCCGGTTACTTTATTCAGTGCCT
5	F6	450	TAGGGCCCAAACGCACAAACACGAT	ATCGTGTTTGTGCGTTTGGGCCCTA
5	F7	451	GTGTGATTTCTTTCGTCGGCCCACC	GTGTGATTTCTTTCGTCGGCCCACC
5	F8	452	AGGAACAGGCAACGACGCTACTCAA	TTGAGTAGCGTCGTTGCCTGTTCCT
5	F9	453	TGTTTTCTGCGCACGTCCCTTCCTA	TGTTTTCTGCGCACGTCCCTTCCTA
5	F10	454	TAGGTCGACTCAGAGCAACAGGTGC	GCACCTGTTGCTCTGAGTCGACCTA
5	F11	455	TTTTCTTGCATGTGCAGGCCGCTTC	TTTTCTTGCATGTGCAGGCCGCTTC
5	F12	456	GAATGAGGTAAGGCTCGGGAGCTCG	CGAGCTCCCGAGCCTTACCTCATTC
5	G1	457	GGTGCTCGTATCTTTGGAGCAGCGT	GGTGCTCGTATCTTTGGAGCAGCGT
5	G2	458	TGCCATCGCGGAGAGCACAGATAAC	GTTATCTGTGCTCTCCGCGATGGCA
5	G3	459	GAGGCTAGTTCGCAGGTCATTGCGT	GAGGCTAGTTCGCAGGTCATTGCGT
5	G4	460	AGCCTAAAGGGGTCAGTCAGGAAAC	GTTTCCTGACTGACCCCTTTAGGCT
5	G5	461	GAGCATCTGGTCATGGCTTGCTACC	GAGCATCTGGTCATGGCTTGCTACC
5	G6	462	ACAGCTAGAGATCGCAGGGATAACC	GGTTATCCCTGCGATCTCTAGCTGT
5	G7	463	CTCTTTGTGGTGTTCCCGGTCTCAA	CTCTTTGTGGTGTTCCCGGTCTCAA
5	G8	464	ACTGGGCACGGCACAATAACACGAT	ATCGTGTTATTGTGCCGTGCCCAGT
5	G9	465	TTGCCTTTTGGTCCTTTCAGCGTTC	TTGCCTTTTGGTCCTTTCAGCGTTC
5	G10	466	ACTCGAAGAATGCCAGGGCCTCAAG	CTTGAGGCCCTGGCATTCTTCGAGT
5	G11	467	ACGTGGGTGGCCTCTACTGTGTTTT	ACGTGGGTGGCCTCTACTGTGTTTT
5	G12	468	ATACATGAGCATAGGAGGCTGCGGA	TCCGCAGCCTCCTATGCTCATGTAT
5	H1	469	TCCCTCTCGTGCTGCTCGATCTCAA	TCCCTCTCGTGCTGCTCGATCTCAA
5	H2	470	GACAGAACTCGGAACCATACCGCAC	GTGCGGTATGGTTCCGAGTTCTGTC
5	H3	471	AGATTGCTTCCCTCGGCGCTAGGTA	AGATTGCTTCCCTCGGCGCTAGGTA
5	H4	472	GATCCCGGACTACCAGAGCCTTACC	GGTAAGGCTCTGGTAGTCCGGGATC
5	H5	473	CATCTTGTTGGCCTCCCGATGGAGT	CATCTTGTTGGCCTCCCGATGGAGT
5	H6	474	GCGATAGGCCACCGTAAGAGCTCAC	GTGAGCTCTTACGGTGGCCTATCGC
5	H7	475	GCTTGGTGCGGTTCTTAGTCTCACA	GCTTGGTGCGGTTCTTAGTCTCACA
5	H8	476	CAGCTAAGGGCCTGGCGACGAAATA	TATTTCGTCGCCAGGCCCTTAGCTG
5	H9	477	GAGCTATGACTGGTTTCCCTCCAGG	GAGCTATGACTGGTTTCCCTCCAGG
5	H10	478	ATACGAGGCTACGCGACGGCTAACT	AGTTAGCCGTCGCGTAGCCTCGTAT
5	H11	479	CTTGATTTGGCTGTCCCCATTGGGT	CTTGATTTGGCTGTCCCCATTGGGT
5	H12	480	GATAGGAAAGCTAGGGATCGCCCTC	GAGGGCGATCCCTAGCTTTCCTATC
6	A1	481	GGGTGGTTAGTGATTTGCCCGTCAC	GGGTGGTTAGTGATTTGCCCGTCAC
6	A2	482	AGGAACATGACCCATACAGCAAGCT	AGCTTGCTGTATGGGTCATGTTCCT
6	A3	483	GAGTGGTCCTTGGGACAGTACCCAG	GAGTGGTCCTTGGGACAGTACCCAG
6	A4	484	GTGGGAAACGTGTAACCAGACGGGA	TCCCGTCTGGTTACACGTTTCCCAC
6	A5	485	TAGAGTCACGTCATGCCTTCCTCCT	TAGAGTCACGTCATGCCTTCCTCCT
6	A6	486	TAGCCTCGAACCGAGGAGACACTCA	TGAGTGTCTCCTCGGTTCGAGGCTA
6	A7	487	TACGTGCAGTTCTCTTGGGGTCCAG	TACGTGCAGTTCTCTTGGGGTCCAG
6	A8	488	GCCACTGATCGGCAAGAGCACTACA	TGTAGTGCTCTTGCCGATCAGTGGC
6	A9	489	AGGTTCTGTTGTAGCGCCTGTCTAG	AGGTTCTGTTGTAGCGCCTGTCTAG
6	A10	490	GAGACTAAACTGTGCCCACAAAGGG	CCCTTTGTGGGCACAGTTTAGTCTC
6	A11	491	TTGTTTTCTCAGGTCCCGCGCGTTT	TTGTTTTCTCAGGTCCCGCGCGTTT
6	A12	492	TCTATGTGAGAGCACCCCAGAGCGA	TCGCTCTGGGGTGCTCTCACATAGA
6	B1	493	CCACGTTCTTAGCCGTGTCGTACCC	CCACGTTCTTAGCCGTGTCGTACCC
6	B2	494	TCACTGGCGCCCTTAGAAGAACCAC	GTGGTTCTTCTAAGGGCGCCAGTGA
6	B3	495	TAGTAGCGTTTGGATCCGCTCCCGT	TAGTAGCGTTTGGATCCGCTCCCGT
6	B4	496	CCAAGGGTAGCCCCTACAGAACGTC	GACGTTCTGTAGGGGCTACCCTTGG
6	B5	497	CTCTACTTCAGTGCCCGGATGAGGC	CTCTACTTCAGTGCCCGGATGAGGC
6	B6	498	AGTAGGCACTGCGAAAGCCAACACA	TGTGTTGGCTTTCGCAGTGCCTACT
6	B7	499	TTAGTGGTCGTCTAGGCTCATCGGC	TTAGTGGTCGTCTAGGCTCATCGGC
6	B8	500	ACGATGTCTGAAGGGAACCTACCAC	GTGGTAGGTTCCCTTCAGACATCGT
6	B9	501	CATCCCAGTCGAGAGGCCCTATACC	CATCCCAGTCGAGAGGCCCTATACC
6	B10	502	CAAGGACCTGATGTGGCTTGGGACT	AGTCCCAAGCCACATCAGGTCCTTG
6	B11	503	TCTAGAGAGTTCCGCTCTGGTTGGT	TCTAGAGAGTTCCGCTCTGGTTGGT
6	B12	504	GATGCAACCAGAGAGGCACTCCATG	CATGGAGTGCCTCTCTGGTTGCATC
6	C1	505	CGTAGTTATGGGGTGGGTCACCTGC	CGTAGTTATGGGGTGGGTCACCTGC
6	C2	506	CGGAGGTGACGGTAGACTCTATGGC	GCCATAGAGTCTACCGTCACCTCCG
6	C3	507	GATGTGGCTCAAGCCCCTTAGGTGA	GATGTGGCTCAAGCCCCTTAGGTGA
6	C4	508	TATGTGAGGCCCTGGAGAAATAGCC	GGCTATTTCTCCAGGGCCTCACATA
6	C5	509	GTTTCTTGGCCTCCAGCTAGTACAG	GTTTCTTGGCCTCCAGCTAGTACAG
6	C6	510	ATATCCCTAAGCCTGAGGGGCTAGA	TCTAGCCCCTCAGGCTTAGGGATAT
6	C7	511	CATCAGTGGTGTGGCCTCGATCCTA	CATCAGTGGTGTGGCCTCGATCCTA
6	C8	512	GAATACCGAGGGCAAGCCATGACAA	TTGTCATGGCTTGCCCTCGGTATTC
6	C9	513	GAGTTGCGCTCCCAAGCTTGTAGTC	GAGTTGCGCTCCCAAGCTTGTAGTC
6	C10	514	AAACTCACTGGAGAGGTACCGACAG	CTGTCGGTACCTCTCCAGTGAGTTT
6	C11	515	CTAGTTTGGGACCCCTGCCGGTTAG	CTAGTTTGGGACCCCTGCCGGTTAG
6	C12	516	GGCAGGACACTCACGAAGAATCTCC	GGAGATTCTTCGTGAGTGTCCTGCC
6	D1	517	GTAGCCCTTGCGTCGTCACTACAGG	GTAGCCCTTGCGTCGTCACTACAGG
6	D2	518	TTACTAGGAAGCGCTACCACCGGAC	GTCCGGTGGTAGCGCTTCCTAGTAA
6	D3	519	GGATCGGCGTACGCTCTTCTTCTCC	GGATCGGCGTACGCTCTTCTTCTCC
6	D4	520	CCACGCAGAGTATCGGAACAGGAGG	CCTCCTGTTCCGATACTCTGCGTGG
6	D5	521	GGCTAGATATCGGTAGCCCTGGGTT	GGCTAGATATCGGTAGCCCTGGGTT
6	D6	522	GCAAACCAGAGCCACCAGATCACGA	TCGTGATCTGGTGGCTCTGGTTTGC
6	D7	523	CACTTTGGTGGCCTAGCGTTTGTGC	CACTTTGGTGGCCTAGCGTTTGTGC
6	D8	524	GCCAAGAAAATGGTGACCCTAGGCA	TGCCTAGGGTCACCATTTTCTTGGC
6	D9	525	GGCCCGTTCTCTCATCGTGTCGATA	GGCCCGTTCTCTCATCGTGTCGATA
6	D10	526	TCGATACTGGGTAAGACCCACACCC	GGGTGTGGGTCTTACCCAGTATCGA
6	D11	527	TCTATACTATAGCCCAGCTCCCAGC	TCTATACTATAGCCCAGCTCCCAGC
6	D12	528	AGGCAGGCTAGAACCAACGAGCATT	AATGCTCGTTGGTTCTAGCCTGCCT
6	E1	529	GAGTTTTCCGCCCATCTTAGGAGGT	GAGTTTTCCGCCCATCTTAGGAGGT
6	E2	530	CACAGCGTAACCCCAGTAGGGTAGC	GCTACCCTACTGGGGTTACGCTGTG
6	E3	531	GAGTGGCCCATGTGGAGGTTTCTAC	GAGTGGCCCATGTGGAGGTTTCTAC
6	E4	532	CTCCGAGGAAGGAGGCCAAGTGATA	TATCACTTGGCCTCCTTCCTCGGAG
6	E5	533	TCCGTCGCCGGAGTCTCAGAGTATC	TCCGTCGCCGGAGTCTCAGAGTATC
6	E6	534	AGTGGAATGCGCCCACTCACACTAC	GTAGTGTGAGTGGGCGCATTCCACT
6	E7	535	GCAGCTCCAGGTCTCGTGTTGAACT	GCAGCTCCAGGTCTCGTGTTGAACT
6	E8	536	AACCCCAGGAACCTACTCAGTAGCT	AGCTACTGAGTAGGTTCCTGGGGTT
6	E9	537	CCAGTACCTTCCTAATCGTCCAGCC	CCAGTACCTTCCTAATCGTCCAGCC
6	E10	538	GATGGGGCCTCACCTAGATCCCAAT	ATTGGGATCTAGGTGAGGCCCCATC
6	E11	539	GTGTTTCTCAGAGGCGGGTGTTACC	GTGTTTCTCAGAGGCGGGTGTTACC
6	E12	540	CAAAGACCCAGTCAGGCAAACGAGC	GCTCGTTTGCCTGACTGGGTCTTTG
6	F1	541	TAGTGGAGCCAGCTGTCTAGTCTGA	TAGTGGAGCCAGCTGTCTAGTCTGA
6	F2	542	CTAATGAGGAATCACCCACCTGGCC	GGCCAGGTGGGTGATTCCTCATTAG
6	F3	543	AGTGGTTCCTGAGGCTTAGGCATCA	AGTGGTTCCTGAGGCTTAGGCATCA
6	F4	544	ATACTGCAACGCCTGGGACCATCTC	GAGATGGTCCCAGGCGTTGCAGTAT
6	F5	545	AGCTGTGATCCCAGTTCTCGCGTTT	AGCTGTGATCCCAGTTCTCGCGTTT
6	F6	546	ATCGCAGACCGTAGGACCCTGAAAC	GTTTCAGGGTCCTACGGTCTGCGAT
6	F7	547	GTCCAGGCTCGTCTTCTCGAAGTCA	GTCCAGGCTCGTCTTCTCGAAGTCA
6	F8	548	GTAGTAGGCAGGGGCACGGATTCAC	GTGAATCCGTGCCCCTGCCTACTAC
6	F9	549	TAGTTCACTGCCTCCTGGTTTACCT	TAGTTCACTGCCTCCTGGTTTACCT
6	F10	550	GCCCATGGTAGCTACATAGACCTGC	GCAGGTCTATGTAGCTACCATGGGC
6	F11	551	AGTGGAGAGGATGCCACCTCCTTTC	AGTGGAGAGGATGCCACCTCCTTTC
6	F12	552	GCTCTGGAATAAGGAGCCAACCACA	TGTGGTTGGCTCCTTATTCCAGAGC
6	G1	553	TGTCCTATAGGGTTGGGACCTCGGG	TGTCCTATAGGGTTGGGACCTCGGG
6	G2	554	GACAAGAATGGTGAACCATGGCCGG	CCGGCCATGGTTCACCATTCTTGTC
6	G3	555	GAGTTAGTCCGACTGGGTCTGGCTA	GAGTTAGTCCGACTGGGTCTGGCTA
6	G4	556	GAACTACTGACAGTGCCCGCCCTAA	TTAGGGCGGGCACTGTCAGTAGTTC
6	G5	557	GTCTTTATGCTCTTGCGCCCTGGAG	GTCTTTATGCTCTTGCGCCCTGGAG
6	G6	558	AGAAGGATGCCACGCCTCCTAACGA	TCGTTAGGAGGCGTGGCATCCTTCT
6	G7	559	GTTTGACGAGTTGCACTCCCAGGGT	GTTTGACGAGTTGCACTCCCAGGGT
6	G8	560	GAACATACACCGCAGGCAACACCGA	TCGGTGTTGCCTGCGGTGTATGTTC
6	G9	561	TAATACCCCTGGGTGTCAGCCTTCT	TAATACCCCTGGGTGTCAGCCTTCT
6	G10	562	TGGCTACACCCAGAGTGGTAATCCC	GGGATTACCACTCTGGGTGTAGCCA
6	G11	563	GGTGTTGGTCACCTACCTGTAGCGA	GGTGTTGGTCACCTACCTGTAGCGA
6	G12	564	CTCTGAGCTGCGCCAGAACAACTAC	GTAGTTGTTCTGGCGCAGCTCAGAG
6	H1	565	GCTGTCTCAGTGCTTTGGTTCGTAG	GCTGTCTCAGTGCTTTGGTTCGTAG
6	H2	566	TCACAGGGAGCGAACTCCACGTAGA	TCTACGTGGAGTTCGCTCCCTGTGA
6	H3	567	CCTTAGAGGCCCTGTCTGATCACGT	CCTTAGAGGCCCTGTCTGATCACGT
6	H4	568	GTCGTCCAGAGAGCCCCAGAAACAC	GTGTTTCTGGGGCTCTCTGGACGAC
6	H5	569	TAGGGGTCTCCCTTGGCTATTAGGA	TAGGGGTCTCCCTTGGCTATTAGGA
6	H6	570	CACTCAGGGAGCCAGCATGGATGTA	TACATCCATGCTGGCTCCCTGAGTG
6	H7	571	GGACATCAGTCGTCTTGGGGTCTCA	GGACATCAGTCGTCTTGGGGTCTCA
6	H8	572	GAAACCGGTCACCATAGAGCAGACC	GGTCTGCTCTATGGTGACCGGTTTC
6	H9	573	GGCTAGGCCTCGGTCCTCTTAAAGC	GGCTAGGCCTCGGTCCTCTTAAAGC
6	H10	574	TAAGGCGCACCACGCAGAAAACACA	TGTGTTTTCTGCGTGGTGCGCCTTA
6	H11	575	GCATCTTGGGGTCCCTCGCGATTTA	GCATCTTGGGGTCCCTCGCGATTTA
6	H12	576	TCTAAGCGGACGACCCAGGCTACAT	ATGTAGCCTGGGTCGTCCGCTTAGA
7	A1	577	TGTACCGGTTGTCGCAGGTGTGTTC	TGTACCGGTTGTCGCAGGTGTGTTC
7	A2	578	GTGCCAGATAGAACCCCAACAACGC	GCGTTGTTGGGGTTCTATCTGGCAC
7	A3	579	GCGTTGCTCATGCAGTAGGCGTAGT	GCGTTGCTCATGCAGTAGGCGTAGT
7	A4	580	AGGTCAGGAGGGGAAGGATCGAATA	TATTCGATCCTTCCCCTCCTGACCT
7	A5	581	TTTGCATAGTCTGGGCCTGTTGTGC	TTTGCATAGTCTGGGCCTGTTGTGC
7	A6	582	CCTGATAGCCGGCCTCAACTGAGAG	CTCTCAGTTGAGGCCGGCTATCAGG
7	A7	583	GCCTCTTCGGATTTACACCCTCGGT	GCCTCTTCGGATTTACACCCTCGGT
7	A8	584	AAGAGGACTGGCCCATTATCCCCAC	GTGGGGATAATGGGCCAGTCCTCTT
7	A9	585	GCGGCTCAGATACCCATCCAGGTAG	GCGGCTCAGATACCCATCCAGGTAG
7	A10	586	GACCTAAGCGCCACGCCCTACATAG	CTATGTAGGGCGTGGCGCTTAGGTC
7	A11	587	TTAGGATCGAGCCCTCGGTAGTCCT	TTAGGATCGAGCCCTCGGTAGTCCT
7	A12	588	GGCTAATAGATGGGAGACTAGGAGA	TCTCCTAGTCTCCCATCTATTAGCC
7	B1	589	ACTGGAGGCTTGATCAGTCGTTCCC	ACTGGAGGCTTGATCAGTCGTTCCC
7	B2	590	GACAGCCCATAGCGGATGTACACGG	CCGTGTACATCCGCTATGGGCTGTC
7	B3	591	GGTATATGTACGGCCCCTCGTGTCA	GGTATATGTACGGCCCCTCGTGTCA
7	B4	592	AGCCTCGGAAATCAATGACCGAGGC	GCCTCGGTCATTGATTTCCGAGGCT
7	B5	593	GGTTTACCTTCGTGGCTGCGAGTCA	GGTTTACCTTCGTGGCTGCGAGTCA
7	B6	594	GAGAACTCCACTGTGGCTACGACCT	AGGTCGTAGCCACAGTGGAGTTCTC
7	B7	595	CTTTCTGGTATCCGTCCCGCGCTAT	CTTTCTGGTATCCGTCCCGCGCTAT
7	B8	596	AAGCGTATAGGAGCCCCACTCACCT	AGGTGAGTGGGGCTCCTATACGCTT
7	B9	597	ATAGGGTAGTCCGCCTTTTCCTGTT	ATAGGGTAGTCCGCCTTTTCCTGTT
7	B10	598	TAGGGACTACCGGCCACACTTGTAC	GTACAAGTGTGGCCGGTAGTCCCTA
7	B11	599	GTAATGCGTCTTCCAGGGCTCCTTT	GTAATGCGTCTTCCAGGGCTCCTTT
7	B12	600	GACAACAATCGCAGGGCGGTAGAAC	GTTCTACCGCCCTGCGATTGTTGTC
7	C1	601	GCGTAGTGTTAGCGTCCGAGGTCTG	GCGTAGTGTTAGCGTCCGAGGTCTG
7	C2	602	AAGGGAGCTTCGACTCCAACCTGAC	GTCAGGTTGGAGTCGAAGCTCCCTT
7	C3	603	CTCCAGCTATAAGGGGACCTAGCCC	CTCCAGCTATAAGGGGACCTAGCCC
7	C4	604	GCCGGAGACGGTACCTCTATAGCAC	GTGCTATAGAGGTACCGTCTCCGGC
7	C5	605	TGTCCCGTCCTCTGACTTTTAGTCT	TGTCCCGTCCTCTGACTTTTAGTCT
7	C6	606	GTACGAGGTCCAAGAGAGACCCACT	AGTGGGTCTCTCTTGGACCTCGTAC
7	C7	607	GGGTGCTCGTTACCTCTGCGCATAT	GGGTGCTCGTTACCTCTGCGCATAT
7	C8	608	CCTTAAACCAGGGCACTCAGACAGC	GCTGTCTGAGTGCCCTGGTTTAAGG
7	C9	609	GTCGAGGTCCCTCTGGGTAACTCTA	GTCGAGGTCCCTCTGGGTAACTCTA
7	C10	610	GCGGGAATGCCAACTAGACCAGAAT	ATTCTGGTCTAGTTGGCATTCCCGC
7	C11	611	CTCACCGTCTTATCCGCCACCAGTA	CTCACCGTCTTATCCGCCACCAGTA
7	C12	612	TACGACAGCTCGGCTACCGACCTAG	CTAGGTCGGTAGCCGAGCTGTCGTA
7	D1	613	CTCTCCTACGTGTTTCCACCCACCG	CTCTCCTACGTGTTTCCACCCACCG
7	D2	614	CAAAAGCGGGCTACAGGCTCCATAC	GTATGGAGCCTGTAGCCCGCTTTTG
7	D3	615	GGTCGAGTTGGCTCCAGGACAGTTT	GGTCGAGTTGGCTCCAGGACAGTTT
7	D4	616	AAAGGAAACACCCCGCACAGTAGCA	TGCTACTGTGCGGGGTGTTTCCTTT
7	D5	617	TTTCCTTAGGGAGCCCTTGTCTCGA	TTTCCTTAGGGAGCCCTTGTCTCGA
7	D6	618	GCTGGACAATAAGCACGTACTGCCC	GGGCAGTACGTGCTTATTGTCCAGC
7	D7	619	CATTAGCTTTGGTGGCCGGTAGGCT	CATTAGCTTTGGTGGCCGGTAGGCT
7	D8	620	AGATACGGGCTGGCTAAGTCGAGAG	CTCTCGACTTAGCCAGCCCGTATCT
7	D9	621	GAATGGTAGAGCCCTCCTCGCTCTT	GAATGGTAGAGCCCTCCTCGCTCTT
7	D10	622	GGCATTAACGCCAGGTGAGAAGAGC	GCTCTTCTCACCTGGCGTTAATGCC
7	D11	623	GTCGCGTAGCCTTTTATGCTCCTTC	GTCGCGTAGCCTTTTATGCTCCTTC
7	D12	624	CGGGTAAATCCTGGGCAGCTCTACC	GGTAGAGCTGCCCAGGATTTACCCG
7	E1	625	CATCAGGGGTAGCTTCCTTTCGCTT	CATCAGGGGTAGCTTCCTTTCGCTT
7	E2	626	TATGCACGGAAGACGAGACTCGCAC	GTGCGAGTCTCGTCTTCCGTGCATA
7	E3	627	ACTCATATTGTGGCCCGTGTGTGGT	ACTCATATTGTGGCCCGTGTGTGGT
7	E4	628	ATGGGTACAACGAGGGAGTGATACC	GGTATCACTCCCTCGTTGTACCCAT
7	E5	629	GGCATGTGGGTCGCTGGTCCATATA	GGCATGTGGGTCGCTGGTCCATATA
7	E6	630	GAGAAGACGGGCCCGCCAGTATATC	GATATACTGGCGGGCCCGTCTTCTC
7	E7	631	GGTCCCTCGTGCATGTGTACTGTAT	GGTCCCTCGTGCATGTGTACTGTAT
7	E8	632	ATACCAGGCCTGAATATGGGGCGAA	TTCGCCCCATATTCAGGCCTGGTAT
7	E9	633	AGAGCCGTCGCCTCTTGACCTCTAT	AGAGCCGTCGCCTCTTGACCTCTAT
7	E10	634	CTAAGAGTATGGCGAGGAGCGCGAC	GTCGCGCTCCTCGCCATACTCTTAG
7	E11	635	TCCATAAGTGCCTGCCTCGGTCATC	TCCATAAGTGCCTGCCTCGGTCATC
7	E12	636	GGCGCTACCGCTAGCTATGTAAGCC	GGCTTACATAGCTAGCGGTAGCGCC
7	F1	637	CTTACGCTTTACTCCCCGGTAGGGC	CTTACGCTTTACTCCCCGGTAGGGC
7	F2	638	ATAACCCACCATGCCAAGTGGGGAA	TTCCCCACTTGGCATGGTGGGTTAT
7	F3	639	ATTATAGGTTGGCCGCGTCCTGCTC	ATTATAGGTTGGCCGCGTCCTGCTC
7	F4	640	GAATATGAAAGCAGGGCAGCTCCAC	GTGGAGCTGCCCTGCTTTCATATTC
7	F5	641	GGGTCATAGGGCTCTAATGCCTCCG	GGGTCATAGGGCTCTAATGCCTCCG
7	F6	642	ACAGGGAATCTAGACCCAAGCAACT	AGTTGCTTGGGTCTAGATTCCCTGT
7	F7	643	AGGGTTGGCACCGTGTCCCTTATAG	AGGGTTGGCACCGTGTCCCTTATAG
7	F8	644	AGAGGGCGACACCCCACTAAAACTT	AAGTTTTAGTGGGGTGTCGCCCTCT
7	F9	645	GGCAACCCTATGCCTTCTTGCTTGT	GGCAACCCTATGCCTTCTTGCTTGT
7	F10	646	TGGAGCGGAAACCCTCTACACTGAT	ATCAGTGTAGAGGGTTTCCGCTCCA
7	F11	647	AACAGGGTAGTTCCCCTCTGAGTCT	AACAGGGTAGTTCCCCTCTGAGTCT
7	F12	648	AGAGGACCAGCGAGACAAATCATGC	GCATGATTTGTCTCGCTGGTCCTCT
7	G1	649	ATAGAGTGCCGTTCGCCTTGCTGTC	ATAGAGTGCCGTTCGCCTTGCTGTC
7	G2	650	CCTAGCAGGGGCCTATACTGTGCAT	ATGCACAGTATAGGCCCCTGCTAGG
7	G3	651	TGGGAGCTATTCCAGTTCGCTTGGC	TGGGAGCTATTCCAGTTCGCTTGGC
7	G4	652	CAGAAGCGTGGAGCATGCTGAACAC	GTGTTCAGCATGCTCCACGCTTCTG
7	G5	653	GTGAGTGGTCATCCCTGATGGATCC	GTGAGTGGTCATCCCTGATGGATCC
7	G6	654	TAACTGAGCGAGAATGCCTGCCTCC	GGAGGCAGGCATTCTCGCTCAGTTA
7	G7	655	TCTTCTATGCCAGGTGGCGCTTTTC	TCTTCTATGCCAGGTGGCGCTTTTC
7	G8	656	AAGAGCTACCCGGAGCATGAAACTG	CAGTTTCATGCTCCGGGTAGCTCTT
7	G9	657	TTTATTGCAGGCTGGCCGAGTTCCT	TTTATTGCAGGCTGGCCGAGTTCCT
7	G10	658	GGTGCGAATGAAGAGACTGGAACCG	CGGTTCCAGTCTCTTCATTCGCACC
7	G11	659	TTTTCTCTGAGCCGTGAGCCAGTCA	TTTTCTCTGAGCCGTGAGCCAGTCA
7	G12	660	GACAAGCAGGAACGGAACCAACAAA	TTTGTTGGTTCCGTTCCTGCTTGTC
7	H1	661	AGGTTTAGAGCCAGCCCGGCATTTT	AGGTTTAGAGCCAGCCCGGCATTTT
7	H2	662	ATTGAGACCAGGGAAGCCACACCTA	TAGGTGTGGCTTCCCTGGTCTCAAT
7	H3	663	GACTTCTTCCGCTCTGCCGGAGATC	GACTTCTTCCGCTCTGCCGGAGATC
7	H4	664	ACGCCAGGGGTCACTATAACTGCTG	CAGCAGTTATAGTGACCCCTGGCGT
7	H5	665	GCTCAAGCAGCGTCCTGGAGTCTAC	GCTCAAGCAGCGTCCTGGAGTCTAC
7	H6	666	TGGCACACTGGCGATAACCCAAAGA	TCTTTGGGTTATCGCCAGTGTGCCA
7	H7	667	CACCAGTCCTCTCGCAGTTTGACTC	CACCAGTCCTCTCGCAGTTTGACTC
7	H8	668	AAGGACCAAAGGGAAAATCACGCCT	AGGCGTGATTTTCCCTTTGGTCCTT
7	H9	669	CCTGTCCACCGCTACCCATGTAGAC	CCTGTCCACCGCTACCCATGTAGAC
7	H10	670	GTCAGTAAACTGGGCCAACAGGACT	AGTCCTGTTGGCCCAGTTTACTGAC
7	H11	671	CTATATGGTCCTGGGGCCCTGACTT	CTATATGGTCCTGGGGCCCTGACTT
7	H12	672	AAAAGACTGCATGCCTGACCGAAGG	CCTTCGGTCAGGCATGCAGTCTTTT
8	A1	673	TCTGGCCTCAGTCCTCTAGGAGTAA	TCTGGCCTCAGTCCTCTAGGAGTAA
8	A2	674	GTCTCTGAGGCTGCTAGCGGGAATC	GATTCCCGCTAGCAGCCTCAGAGAC
8	A3	675	TGACTGATGGGGTCCAGGTCTTTCC	TGACTGATGGGGTCCAGGTCTTTCC
8	A4	676	AGAACTCCGAAGCGAGGGCAGAAAT	ATTTCTGCCCTCGCTTCGGAGTTCT
8	A5	677	ACCGGTTCTCCCTCCTATATGGCTA	ACCGGTTCTCCCTCCTATATGGCTA
8	A6	678	TAGGGCCCTACTCACAACTACGCTG	CAGCGTAGTTGTGAGTAGGGCCCTA
8	A7	679	GGTGGTCTTGGTAGCCCTTATCCAA	GGTGGTCTTGGTAGCCCTTATCCAA
8	A8	680	GAGAATACCAAGCCGACCCCTGGTA	TACCAGGGGTCGGCTTGGTATTCTC
8	A9	681	GTAGGGTTATTGCCCCAGCTGTTAG	GTAGGGTTATTGCCCCAGCTGTTAG
8	A10	682	AAGCATAGCTAAAGGCCAAGGGCGT	ACGCCCTTGGCCTTTAGCTATGCTT
8	A11	683	CGGTTAGTCTTCACGCCCTGGTGTA	CGGTTAGTCTTCACGCCCTGGTGTA
8	A12	684	TAGCAAAGACGAGCCGACTCACCAG	CTGGTGAGTCGGCTCGTCTTTGCTA
8	B1	685	ATAACTCATGCCTCCATGCAGCCCC	ATAACTCATGCCTCCATGCAGCCCC
8	B2	686	AACACAGGAATGGCAAAGCAGTACC	GGTACTGCTTTGCCATTCCTGTGTT
8	B3	687	TCGGTGTCCCATGTTGCCGATCTTC	TCGGTGTCCCATGTTGCCGATCTTC
8	B4	688	CATGACACGAGGCGAGGGAGTAACT	AGTTACTCCCTCGCCTCGTGTCATG
8	B5	689	GGCAGCGTGTAGCATTTACCAGGGT	GGCAGCGTGTAGCATTTACCAGGGT
8	B6	690	TGATCACCTAGCGGCTAAACGGCAC	GTGCCGTTTAGCCGCTAGGTGATCA
8	B7	691	GTGGCCCGTCAGATCCACCATTAGA	GTGGCCCGTCAGATCCACCATTAGA
8	B8	692	AACACTTCAGGGGTGGCAAAGCAAC	GTTGCTTTGCCACCCCTGAAGTGTT
8	B9	693	GGACGCAGTTAGGCCTTGTGTCGTT	GGACGCAGTTAGGCCTTGTGTCGTT
8	B10	694	AGGGACTGGTAAAGCCTCACAAGTC	GACTTGTGAGGCTTTACCAGTCCCT
8	B11	695	GGCCTGGGGATTCGTATCATCGTCC	GGCCTGGGGATTCGTATCATCGTCC
8	B12	696	CTACCCGAGGGGCAAACGAGTACAA	TTGTACTCGTTTGCCCCTCGGGTAG
8	C1	697	GGTCCACAGACTGGCCTTCAATCCT	GGTCCACAGACTGGCCTTCAATCCT
8	C2	698	AGATCCTGGCGCTCACTAACCTAGC	GCTAGGTTAGTGAGCGCCAGGATCT
8	C3	699	TCATCTAGAGCCCACCGGTCTCTTG	TCATCTAGAGCCCACCGGTCTCTTG
8	C4	700	AGAAATCGGTGCGTGGAGGAGAAGG	CCTTCTCCTCCACGCACCGATTTCT
8	C5	701	GTGTCATTACGCCCCGTAGCGTTGT	GTGTCATTACGCCCCGTAGCGTTGT
8	C6	702	TAGACGCTACCGAGGGGCCCTATTC	GAATAGGGCCCCTCGGTAGCGTCTA
8	C7	703	CTTTGTACTATCTTGGCCGGGGCCA	CTTTGTACTATCTTGGCCGGGGCCA
8	C8	704	GTGACCTGGCCAAACTGGTACTCCT	AGGAGTACCAGTTTGGCCAGGTCAC
8	C9	705	CTCTTTGTGAGGCGTGTGTCGCTTC	CTCTTTGTGAGGCGTGTGTCGCTTC
8	C10	706	ACAAAGGCCCTTGACCGAGAGTCAC	GTGACTCTCGGTCAAGGGCCTTTGT
8	C11	707	CCGTTTCCTGTAGAACCTCCCCACA	CCGTTTCCTGTAGAACCTCCCCACA
8	C12	708	AGATCGTGGAGCCCCAATAGGACCT	AGGTCCTATTGGGGCTCCACGATCT
8	D1	709	CCTGGTCACCAGTCGTCTTTACCTT	CCTGGTCACCAGTCGTCTTTACCTT
8	D2	710	AGCTGCGGGTACCAACCTAACATCC	GGATGTTAGGTTGGTACCCGCAGCT
8	D3	711	TGTCTCTATGTTCGTCTGCTGCGGT	TGTCTCTATGTTCGTCTGCTGCGGT
8	D4	712	GTCCACACACGGAGTGGAGAAGCTA	TAGCTTCTCCACTCCGTGTGTGGAC
8	D5	713	AGGCGCTAGAGGTCCCTATTATGCC	AGGCGCTAGAGGTCCCTATTATGCC
8	D6	714	GGACTGAGGAATCAAGACGCCCTCA	TGAGGGCGTCTTGATTCCTCAGTCC
8	D7	715	TCTGTTGGTTGAGTCAGCCCGATCT	TCTGTTGGTTGAGTCAGCCCGATCT
8	D8	716	GCGGACAAGAGGCGAAACATGATCC	GGATCATGTTTCGCCTCTTGTCCGC
8	D9	717	GCAGTAGCGTAGCAGGCCTATATCC	GCAGTAGCGTAGCAGGCCTATATCC
8	D10	718	AGTAGTAAAGAGGCACCGACACCGG	CCGGTGTCGGTGCCTCTTTACTACT
8	D11	719	TACCTTGGTTTCCCTTACCGGGGTG	TACCTTGGTTTCCCTTACCGGGGTG
8	D12	720	GAGGGTACGGGGCAAATGACATGAT	ATCATGTCATTTGCCCCGTACCCTC
8	E1	721	GTGGACTTCAGCCATAGGGCTGCAT	GTGGACTTCAGCCATAGGGCTGCAT
8	E2	722	GATAGACACCACGGGACTGTCATGC	GCATGACAGTCCCGTGGTGTCTATC
8	E3	723	GGGGCCTATTACCAGTAGTCAGTCA	GGGGCCTATTACCAGTAGTCAGTCA
8	E4	724	GGAGACCTGCGCCGACATAGTAAAC	GTTTACTATGTCGGCGCAGGTCTCC
8	E5	725	GAGGAGGGCATTTCCTCGCCTATCA	GAGGAGGGCATTTCCTCGCCTATCA
8	E6	726	TAACGGAGAACTCCCACGAAAGCGC	GCGCTTTCGTGGGAGTTCTCCGTTA
8	E7	727	CTGGCAGGTGTTTCCCATGATCCTA	CTGGCAGGTGTTTCCCATGATCCTA
8	E8	728	TAGTCAGCGGGACAGGCTGATGGTA	TACCATCAGCCTGTCCCGCTGACTA
8	E9	729	ATTTGCTAGGAGTCTGGCTCAGTCC	ATTTGCTAGGAGTCTGGCTCAGTCC
8	E10	730	TAGGAACTAAAAGGCCCGACCTCCG	CGGAGGTCGGGCCTTTTAGTTCCTA
8	E11	731	GGTCATCTGGATTCCAGGCGTCATC	GGTCATCTGGATTCCAGGCGTCATC
8	E12	732	TAATCCAAACAGGGCAGACGCCAAC	GTTGGCGTCTGCCCTGTTTGGATTA
8	F1	733	GCCGTGAGTGCTCCATACCGAGTTC	GCCGTGAGTGCTCCATACCGAGTTC
8	F2	734	GACCCAGGGCTATCTAACCGCAGTC	GACTGCGGTTAGATAGCCCTGGGTC
8	F3	735	GACGGGTGAGTGCTAGTCCTTTGCA	GACGGGTGAGTGCTAGTCCTTTGCA
8	F4	736	GGGGTATGCTGACGACGTACTCTGC	GCAGAGTACGTCGTCAGCATACCCC
8	F5	737	CCTTTGAGTAGGGAGGTTTCCGCCA	CCTTTGAGTAGGGAGGTTTCCGCCA
8	F6	738	ACCACGGGCAAGCAATAAGACGACA	TGTCGTCTTATTGCTTGCCCGTGGT
8	F7	739	GTATGGTGTAGTCAGGGCGTTCCGA	GTATGGTGTAGTCAGGGCGTTCCGA
8	F8	740	ACATAGCAGGCTGATGACCGACTAC	GTAGTCGGTCATCAGCCTGCTATGT
8	F9	741	CTAGTCGTGAGGGCTGCTTGCTTCA	CTAGTCGTGAGGGCTGCTTGCTTCA
8	F10	742	AAAAGGGGCAGCGCAGCAATAAAAC	GTTTTATTGCTGCGCTGCCCCTTTT
8	F11	743	ATCCCTAGCTGGGAGTGTCCAACTC	ATCCCTAGCTGGGAGTGTCCAACTC
8	F12	744	AAATCAGCACTACCTGACGGAGAGG	CCTCTCCGTCAGGTAGTGCTGATTT
8	G1	745	GTTAAGTATCTGCCAGTGCTCCCGT	GTTAAGTATCTGCCAGTGCTCCCGT
8	G2	746	CCGGAAAGCTGGGTATCAGGAAACC	GGTTTCCTGATACCCAGCTTTCCGG
8	G3	747	GGTTGCTGGCTGCCAACTCTGTATC	GGTTGCTGGCTGCCAACTCTGTATC
8	G4	748	CTACCTAGACTAGGGTGGCCGATGA	TCATCGGCCACCCTAGTCTAGGTAG
8	G5	749	TTTCAGGTGTTGAGGCTCAGGCCAT	TTTCAGGTGTTGAGGCTCAGGCCAT
8	G6	750	TGGCCCTGGAGGTAGGACTTAGATG	CATCTAAGTCCTACCTCCAGGGCCA
8	G7	751	CCAGTGAGTGGGTGTTTTAAGCCCC	CCAGTGAGTGGGTGTTTTAAGCCCC
8	G8	752	GCACAGATGCAGCGACCATACTGAG	CTCAGTATGGTCGCTGCATCTGTGC
8	G9	753	GGCTTGAGGGGCTCCTCCGTTAATT	GGCTTGAGGGGCTCCTCCGTTAATT
8	G10	754	AGGGAGCATATGCGCTAGGGAATAG	CTATTCCCTAGCGCATATGCTCCCT
8	G11	755	GTTCAGTTGCGAAGGGGTGCCTCTA	GTTCAGTTGCGAAGGGGTGCCTCTA
8	G12	756	CAGAGGGCAGGCTGATAGCACATAA	TTATGTGCTATCAGCCTGCCCTCTG
8	H1	757	GGAAGGGGTCTGGTGAGCCCTTATC	GGAAGGGGTCTGGTGAGCCCTTATC
8	H2	758	AAGCCAGCCATATAGCAGGGAAGAA	TTCTTCCCTGCTATATGGCTGGCTT
8	H3	759	GTTGGTCCGTCTGGAGCGCTATAGT	GTTGGTCCGTCTGGAGCGCTATAGT
8	H4	760	TATAAAGGAGACGCCTGCCCAGGAA	TTCCTGGGCAGGCGTCTCCTTTATA
8	H5	761	GTATGGGCTCGCTCCGTAGCGTATC	GTATGGGCTCGCTCCGTAGCGTATC
8	H6	762	TGTTACTGAAAGAGGGCAGTGCGGC	GCCGCACTGCCCTCTTTCAGTAACA
8	H7	763	GTGGGTATCGTAGTGCATCTCGCTC	GTGGGTATCGTAGTGCATCTCGCTC
8	H8	764	AAGGTACCCTACGGGACGAACTTGC	GCAAGTTCGTCCCGTAGGGTACCTT
8	H9	765	GCTTTCGATTTGCCTGTTGTCCGCT	GCTTTCGATTTGCCTGTTGTCCGCT
8	H10	766	AGGTCCGAAAGAGGAAAACACCGAC	GTCGGTGTTTTCCTCTTTCGGACCT
8	H11	767	GGAGTTTTCTACTGCTAGCGGCCGT	GGAGTTTTCTACTGCTAGCGGCCGT
8	H12	768	TAGACAAACAACGGTGCCCACAAGC	GCTTGTGGGCACCGTTGTTTGTCTA
9	A1	769	CGAGGGGTACGATCTCCCTGTTCCA	CGAGGGGTACGATCTCCCTGTTCCA
9	A2	770	GGTAACCAGGAGTAAACCAAACCCC	GGGGTTTGGTTTACTCCTGGTTACC
9	A3	771	GATCTATGCTCGCCCTACCTAGCGC	GATCTATGCTCGCCCTACCTAGCGC
9	A4	772	ACTAGAGCAACCCAACCCGAACGAA	TTCGTTCGGGTTGGGTTGCTCTAGT
9	A5	773	TCCTCAGCTTAGAGCGTCCTGTAGG	TCCTCAGCTTAGAGCGTCCTGTAGG
9	A6	774	AAAGGCACCAACGACATGACCGCAA	TTGCGGTCATGTCGTTGGTGCCTTT
9	A7	775	TTTGGTCAGGGTTGGCTCGATTCCT	TTTGGTCAGGGTTGGCTCGATTCCT
9	A8	776	GCAAACCGGTAACAACGAGCAACCC	GGGTTGCTCGTTGTTACCGGTTTGC
9	A9	777	GGTTGCGTCAGTCCCTAGATTACCT	GGTTGCGTCAGTCCCTAGATTACCT
9	A10	778	AGGGTGCACAGCATCTAAGAGCACA	TGTGCTCTTAGATGCTGTGCACCCT
9	A11	779	GTGCCGAGTGGGTCATGCTCTAAGT	GTGCCGAGTGGGTCATGCTCTAAGT
9	A12	780	GAGCCCAGGACATAGCTATGCACGT	ACGTGCATAGCTATGTCCTGGGCTC
9	B1	781	GGTGTGGCAGTACTCTCCACCTATA	GGTGTGGCAGTACTCTCCACCTATA
9	B2	782	AGGACTCACTCGGGCTGTAACACTG	CAGTGTTACAGCCCGAGTGAGTCCT
9	B3	783	TCAGGTTATCAGGAGGTTCCGTGGC	TCAGGTTATCAGGAGGTTCCGTGGC
9	B4	784	AAGTACAGGAGGCCCAGTGATACCG	CGGTATCACTGGGCCTCCTGTACTT
9	B5	785	TTTCTGGGCGGACAGGTCTAGTCTC	TTTCTGGGCGGACAGGTCTAGTCTC
9	B6	786	TACTAGCTAAGCGGGCCAGACGATC	GATCGTCTGGCCCGCTTAGCTAGTA
9	B7	787	ATCTGTAGTGTCCGTCTCCTGCATT	ATCTGTAGTGTCCGTCTCCTGCATT
9	B8	788	TAAGAGGCGCACCGTAGACAACCAG	CTGGTTGTCTACGGTGCGCCTCTTA
9	B9	789	CCAATGCCGGTGGCTAGGTTCTCTT	CCAATGCCGGTGGCTAGGTTCTCTT
9	B10	790	GCTAAACAAGGCTGCGAAGCAGAAG	CTTCTGCTTCGCAGCCTTGTTTAGC
9	B11	791	AGAGGAGCACGGTCCCTTTGCTTTC	AGAGGAGCACGGTCCCTTTGCTTTC
9	B12	792	TGACCGGTAGTCCAGGACTCGAAGG	CCTTCGAGTCCTGGACTACCGGTCA
9	C1	793	TGGGTCTCGTCGCTCGTTTCAGAGT	TGGGTCTCGTCGCTCGTTTCAGAGT
9	C2	794	GCAACTGCCTGACGCCTAAGAAGTC	GACTTCTTAGGCGTCAGGCAGTTGC
9	C3	795	GATTGTGCCTTTCCAGGTTAGCGCT	GATTGTGCCTTTCCAGGTTAGCGCT
9	C4	796	GAGCTGGCATTGAGGCATAAACCCC	GGGGTTTATGCCTCAATGCCAGCTC
9	C5	797	GGCTAGATCGTCAGTGCTAGAGCCA	GGCTAGATCGTCAGTGCTAGAGCCA
9	C6	798	AGCCCACCCCACAGGTAATATGTGC	GCACATATTACCTGTGGGGTGGGCT
9	C7	799	AATGGACTCAGCCCCTTCCTAGTGC	AATGGACTCAGCCCCTTCCTAGTGC
9	C8	800	GGGTACAGCATCCAACTAAGACGCC	GGCGTCTTAGTTGGATGCTGTACCC
9	C9	801	TCTGTTTCTATGCGGGTGAGGGTCC	TCTGTTTCTATGCGGGTGAGGGTCC
9	C10	802	CGGGGAATAGGAGACTAGCCAGTAG	CTACTGGCTAGTCTCCTATTCCCCG
9	C11	803	GGTTCGTTACGGCCATCACCAGGTT	GGTTCGTTACGGCCATCACCAGGTT
9	C12	804	CAGGCGGGTAAACCCCGACTGATAG	CTATCAGTCGGGGTTTACCCGCCTG
9	D1	805	TACCTATCTCTACCTTCGTGCCCTC	TACCTATCTCTACCTTCGTGCCCTC
9	D2	806	TACATGGAGCAACAGGGACTCTCCA	TGGAGAGTCCCTGTTGCTCCATGTA
9	D3	807	GCGGCGCGGTTAGCTAGTCTCTATC	GCGGCGCGGTTAGCTAGTCTCTATC
9	D4	808	GCACCATAGGGACTCTACAGCGCAA	TTGCGCTGTAGAGTCCCTATGGTGC
9	D5	809	TTATGTCCAGGAGTCCTCCGGTGTG	TTATGTCCAGGAGTCCTCCGGTGTG
9	D6	810	CGAACTGGCGCACTGACTAAGCCAA	TTGGCTTAGTCAGTGCGCCAGTTCG
9	D7	811	GATGTCCTGGTACCCGTGGAGTTCA	GATGTCCTGGTACCCGTGGAGTTCA
9	D8	812	ATGCCTGAGAAAACGGACTAGCCTC	GAGGCTAGTCCGTTTTCTCAGGCAT
9	D9	813	GAGTTTCTTTCCTCAGGGTGATCCT	GAGTTTCTTTCCTCAGGGTGATCCT
9	D10	814	GTAGGGGAACCCAACAGTACCAACG	CGTTGGTACTGTTGGGTTCCCCTAC
9	D11	815	TTGTGTGGTGCCACCGAGCTTATCC	TTGTGTGGTGCCACCGAGCTTATCC
9	D12	816	CCAGAAGTAAGGCAAGCCTCTGCAC	GTGCAGAGGCTTGCCTTACTTCTGG
9	E1	817	TTCGTTGGCAGGTTTCCTTTCCGTC	TTCGTTGGCAGGTTTCCTTTCCGTC
9	E2	818	CGAGTAGGGACAACCAACGCTACAC	GTGTAGCGTTGGTTGTCCCTACTCG
9	E3	819	TCAGAGGGCTTCTCGGCCTTCTTTA	TCAGAGGGCTTCTCGGCCTTCTTTA
9	E4	820	AGGAGGTCAGTCACAAGACCACACA	TGTGTGGTCTTGTGACTGACCTCCT
9	E5	821	GTGCCTGTGTCGTCGCTATGGATCA	GTGCCTGTGTCGTCGCTATGGATCA
9	E6	822	ATGGTAGGGAGAGCCTAGGCGTCAT	ATGACGCCTAGGCTCTCCCTACCAT
9	E7	823	GTACTGTAGCGCGGGTCAGCTACTC	GTACTGTAGCGCGGGTCAGCTACTC
9	E8	824	GGAGATGACGTGCGAGCCTCAGTAC	GTACTGAGGCTCGCACGTCATCTCC
9	E9	825	TTTGCTACGTGTCAGTCTCCCGTGT	TTTGCTACGTGTCAGTCTCCCGTGT
9	E10	826	CACCCAAGACAGGCCTATACGCACA	TGTGCGTATAGGCCTGTCTTGGGTG
9	E11	827	GCGCGAGTAGGGGTTCTTGGTTGTT	GCGCGAGTAGGGGTTCTTGGTTGTT
9	E12	828	ACGAACTGATGGCTGAAACTGAACC	GGTTCAGTTTCAGCCATCAGTTCGT
9	F1	829	GCAGCTTTAGTGCTCTGTCGCGTTA	GCAGCTTTAGTGCTCTGTCGCGTTA
9	F2	830	TGGGATGACGTGGGAATAAACCAGG	CCTGGTTTATTCCCACGTCATCCCA
9	F3	831	TGATTACCCGACCTCCCTTTCTCCT	TGATTACCCGACCTCCCTTTCTCCT
9	F4	832	GTGCTCTGAGACAGGGCAACTCAAG	CTTGAGTTGCCCTGTCTCAGAGCAC
9	F5	833	GCTGGGTGTCGTTTCGTCTCCGATA	GCTGGGTGTCGTTTCGTCTCCGATA
9	F6	834	ACGGGGCTCCAAATCGAAAGAGGAA	TTCCTCTTTCGATTTGGAGCCCCGT
9	F7	835	GCTCCCAGACCTCCGTTGGGTTAAT	GCTCCCAGACCTCCGTTGGGTTAAT
9	F8	836	TAGCACGGAGCTAGGTAAGACGACA	TGTCGTCTTACCTAGCTCCGTGCTA
9	F9	837	CACGTTCAGTGGCCCTTCCTATACC	CACGTTCAGTGGCCCTTCCTATACC
9	F10	838	GCCGGGAAGGGAACGTACAACTCAT	ATGAGTTGTACGTTCCCTTCCCGGC
9	F11	839	AGTAGTAAGTCAGGGCCTCTGTCCG	AGTAGTAAGTCAGGGCCTCTGTCCG
9	F12	840	GACCGGGCCAGCACAAGATTATGGA	TCCATAATCTTGTGCTGGCCCGGTC
9	G1	841	GAGCTGCGGTCGTGGCCCTTTATTA	GAGCTGCGGTCGTGGCCCTTTATTA
9	G2	842	TCGTCTAGGCAAGGCTACCCAAGCT	AGCTTGGGTAGCCTTGCCTAGACGA
9	G3	843	ACTCCTTCGATCCTTTGGTGGCGTC	ACTCCTTCGATCCTTTGGTGGCGTC
9	G4	844	CAAATGGGAGCTGGTGATGGACCGA	TCGGTCCATCACCAGCTCCCATTTG
9	G5	845	TGTGCTTGGCCCCTGGTTGATTATC	TGTGCTTGGCCCCTGGTTGATTATC
9	G6	846	AAACAAAGCAGCGGGAACTCTCCCA	TGGGAGAGTTCCCGCTGCTTTGTTT
9	G7	847	ATATCGCTCTGTCCGGCTCGTACCT	ATATCGCTCTGTCCGGCTCGTACCT
9	G8	848	AGTAGGGGAAACCGACGGTCTCACT	AGTGAGACCGTCGGTTTCCCCTACT
9	G9	849	GTTTGCCATAGGAGGCCCCTACATT	GTTTGCCATAGGAGGCCCCTACATT
9	G10	850	TAAGAGGCTCCTGGCTACAGAACTG	CAGTTCTGTAGCCAGGAGCCTCTTA
9	G11	851	CAGTCTTCGCCCATCCCTCAGGAAT	CAGTCTTCGCCCATCCCTCAGGAAT
9	G12	852	CGCCCTATAGGACGGAACCGGATAC	GTATCCGGTTCCGTCCTATAGGGCG
9	H1	853	CCTAGCTGTACGGCCTGATCCTGTT	CCTAGCTGTACGGCCTGATCCTGTT
9	H2	854	AGCATGTACGCAGTAAAGGCGGACC	GGTCCGCCTTTACTGCGTACATGCT
9	H3	855	GTCTGGATCTACCACCCGGTGGTAG	GTCTGGATCTACCACCCGGTGGTAG
9	H4	856	ACTGGAAGGGGCGGGAATCAATAAA	TTTATTGATTCCCGCCCCTTCCAGT
9	H5	857	ATCCTGGGTTCTGCCTACAGTCAGA	ATCCTGGGTTCTGCCTACAGTCAGA
9	H6	858	CTAACGAAGGGACCAACTCAACGCC	GGCGTTGAGTTGGTCCCTTCGTTAG
9	H7	859	GGTAGCTCGGGGTGGTACTCTACTG	GGTAGCTCGGGGTGGTACTCTACTG
9	H8	860	CAGACCCAGGTCAGACATAGCAGGA	TCCTGCTATGTCTGACCTGGGTCTG
9	H9	861	GCAGATTTCATCAGGGGCTAGTCCT	GCAGATTTCATCAGGGGCTAGTCCT
9	H10	862	ACTGGACGGCTATACCCGACTAACT	AGTTAGTCGGGTATAGCCGTCCAGT
9	H11	863	GTGATTATCCGTGAGCCCTTGGCTC	GTGATTATCCGTGAGCCCTTGGCTC
9	H12	864	GGCACTCCGGACTACTAAACGAAGG	CCTTCGTTTAGTAGTCCGGAGTGCC
10	A1	865	GCATAGTCCACCGTTATTCGGGGCT	GCATAGTCCACCGTTATTCGGGGCT
10	A2	866	TGGAGAGCTCTAGCAAGCACCTCAT	ATGAGGTGCTTGCTAGAGCTCTCCA
10	A3	867	AGTCTTCTGGCGGTACAGGCTCTTA	AGTCTTCTGGCGGTACAGGCTCTTA
10	A4	868	TGGCAGGTAAACGGGGCTAAGTAGA	TCTACTTAGCCCCGTTTACCTGCCA
10	A5	869	CACTTCGTGCTCTGTGCCATCGCTA	CACTTCGTGCTCTGTGCCATCGCTA
10	A6	870	ACACCACTCAAGTGTAGCAGGGAAC	GTTCCCTGCTACACTTGAGTGGTGT
10	A7	871	TCTCCAGTTGTTTCGTGTTCGCCAC	TCTCCAGTTGTTTCGTGTTCGCCAC
10	A8	872	AGGCGGATTGGGGAAACCCCTAAAA	TTTTAGGGGTTTCCCCAATCCGCCT
10	A9	873	GGGTCCGTACTAGTGGATCCTCACA	GGGTCCGTACTAGTGGATCCTCACA
10	A10	874	CCATACTAGCAGAGGCCCGGCAAAT	ATTTGCCGGGCCTCTGCTAGTATGG
10	A11	875	GTTCCCAGACCGAGGTAGCTGTAGG	GTTCCCAGACCGAGGTAGCTGTAGG
10	A12	876	ATGTGAGCAAACGAGGATGCCCCTC	GAGGGGCATCCTCGTTTGCTCACAT
10	B1	877	GTGCAGGGCTCCGTACAGTACACTT	GTGCAGGGCTCCGTACAGTACACTT
10	B2	878	GTTAGGGACACCCCGAGAAACAGCT	AGCTGTTTCTCGGGGTGTCCCTAAC
10	B3	879	ACTATTTGGCTGTGCCTCCGGTTTC	ACTATTTGGCTGTGCCTCCGGTTTC
10	B4	880	CGGGAACTAGAATGCAAGTGAGGAC	GTCCTCACTTGCATTCTAGTTCCCG
10	B5	881	GTTCGGGTAATTTCTCGGGCCCTCA	GTTCGGGTAATTTCTCGGGCCCTCA
10	B6	882	GCAAGGGAAACACTGGCCAAATGTC	GACATTTGGCCAGTGTTTCCCTTGC
10	B7	883	CGGTTGAAGGCCTCCCTAGTTCTGT	CGGTTGAAGGCCTCCCTAGTTCTGT
10	B8	884	ACAAGGGCTCTCCTACTAGACGACA	TGTCGTCTAGTAGGAGAGCCCTTGT
10	B9	885	GAGTTAGCTAGCATTGGGCTGCCTG	GAGTTAGCTAGCATTGGGCTGCCTG
10	B10	886	GCACCGGATGCAGCTAAGCACAGTA	TACTGTGCTTAGCTGCATCCGGTGC
10	B11	887	TTCTCAGAGTGGGCGTAGAGCCCAT	TTCTCAGAGTGGGCGTAGAGCCCAT
10	B12	888	AGATCCAGGCCAGATGCCAGAAACA	TGTTTCTGGCATCTGGCCTGGATCT
10	C1	889	AGTGGTGCTCTCCTGTTTTAGCGTG	AGTGGTGCTCTCCTGTTTTAGCGTG
10	C2	890	TAGAATGGACGGGCCGAAATCCACC	GGTGGATTTCGGCCCGTCCATTCTA
10	C3	891	CTCTGCCAAGAGTAGCTTGCTGGGT	CTCTGCCAAGAGTAGCTTGCTGGGT
10	C4	892	AAAAGTGTGGCCTGGTGAGGCTGAT	ATCAGCCTCACCAGGCCACACTTTT
10	C5	893	CCTATGGCCCAGTACTCAGGTATCT	CCTATGGCCCAGTACTCAGGTATCT
10	C6	894	GGCAAGTCGTGACAGGAGACGAACA	TGTTCGTCTCCTGTCACGACTTGCC
10	C7	895	GTTGCATTTTCCGGGCCGTGTTTCA	GTTGCATTTTCCGGGCCGTGTTTCA
10	C8	896	GAAAACCCTGGACGCTCAGCCAGTA	TACTGGCTGAGCGTCCAGGGTTTTC
10	C9	897	ACTGGTGTATTGGGGTCATTCCCTC	ACTGGTGTATTGGGGTCATTCCCTC
10	C10	898	ATGCTTGACTAGGGGAACACCCCAA	TTGGGGTGTTCCCCTAGTCAAGCAT
10	C11	899	GTTCTCGCCGTCTTCGTACGGCATC	GTTCTCGCCGTCTTCGTACGGCATC
10	C12	900	GAGCTCGTAGCCCCAGATGCATGAC	GTCATGCATCTGGGGCTACGAGCTC
10	D1	901	GGTTCACGTGAGCCCCTCTTATAGT	GGTTCACGTGAGCCCCTCTTATAGT
10	D2	902	ATACACTGAAGACGGAGCGTCCCAC	GTGGGACGCTCCGTCTTCAGTGTAT
10	D3	903	ATTCACTGTAGGGGTGGTGCCCATT	ATTCACTGTAGGGGTGGTGCCCATT
10	D4	904	TCCGAGGCTTCTAGGCAGGAGACTA	TAGTCTCCTGCCTAGAAGCCTCGGA
10	D5	905	TTTGGGGAGGTGCCCTTGACCTATC	TTTGGGGAGGTGCCCTTGACCTATC
10	D6	906	AGAGGAGAGAACACGCAAAAGCGTC	GACGCTTTTGCGTGTTCTCTCCTCT
10	D7	907	CCATTCTCCTCGTGTTCGCGTAGCA	CCATTCTCCTCGTGTTCGCGTAGCA
10	D8	908	AACTGAAGGATCAGCAAAGGCCCAA	TTGGGCCTTTGCTGATCCTTCAGTT
10	D9	909	AGTTACTCGCTTCGCCACTGTCTGC	AGTTACTCGCTTCGCCACTGTCTGC
10	D10	910	GGGAGGGAGGTGATCGCTCAAGTAA	TTACTTGAGCGATCACCTCCCTCCC
10	D11	911	TCCTCCGTAGTTACAGAGGCCCTAT	TCCTCCGTAGTTACAGAGGCCCTAT
10	D12	912	TAACAGAAACAAGCCGCGAACTGGC	GCCAGTTCGCGGCTTGTTTCTGTTA
10	E1	913	CAGGAGGTTATGGGTCGGTTTCCCA	CAGGAGGTTATGGGTCGGTTTCCCA
10	E2	914	ACTGAGTACCTAAGACCACCCGAGA	TCTCGGGTGGTCTTAGGTACTCAGT
10	E3	915	ATCAGTTGGCCTAGTGGGAGTTCGC	ATCAGTTGGCCTAGTGGGAGTTCGC
10	E4	916	TGGGCGCTAGAAACCGAAAGAGTGA	TCACTCTTTCGGTTTCTAGCGCCCA
10	E5	917	TGGTAGCTGGTGCCCCAGATATAGC	TGGTAGCTGGTGCCCCAGATATAGC
10	E6	918	GGACTATGAAGGAACGTGGGACGTC	GACGTCCCACGTTCCTTCATAGTCC
10	E7	919	CCCGTGTGGTACACCTCTTCTACCA	CCCGTGTGGTACACCTCTTCTACCA
10	E8	920	CAAGTGAAGCTGGGGAGACCACATA	TATGTGGTCTCCCCAGCTTCACTTG
10	E9	921	GTAGTACATGGTTGCTCGCCTTGCT	GTAGTACATGGTTGCTCGCCTTGCT
10	E10	922	AAACAACGGGACTGGCGCTAAAGAA	TTCTTTAGCGCCAGTCCCGTTGTTT
10	E11	923	GGTAGTTTCTTTCGCGCCCGATCCA	GGTAGTTTCTTTCGCGCCCGATCCA
10	E12	924	CCAGGCATGAGCACGAAGCTGTAAC	GTTACAGCTTCGTGCTCATGCCTGG
10	F1	925	GCTTGAGGCGTGTTAGTGCCGTCAT	GCTTGAGGCGTGTTAGTGCCGTCAT
10	F2	926	TGACGCCCGAGAGGACCTGTCTAAA	TTTAGACAGGTCCTCTCGGGCGTCA
10	F3	927	ATTTTGGGTCGCCAGTGTGTAGCTC	ATTTTGGGTCGCCAGTGTGTAGCTC
10	F4	928	GCTAGACCCGATGCCCAAGGTGAAA	TTTCACCTTGGGCATCGGGTCTAGC
10	F5	929	CCTCAGGCAAGAGCCTCTTACCGTC	CCTCAGGCAAGAGCCTCTTACCGTC
10	F6	930	TGAAGGCCCCGAACAACTGTAAAGC	GCTTTACAGTTGTTCGGGGCCTTCA
10	F7	931	GGTTCGTCTAGGGTAGTCGCTTCAC	GGTTCGTCTAGGGTAGTCGCTTCAC
10	F8	932	GTGCTGGCCATGGGTGAGAAGATGT	ACATCTTCTCACCCATGGCCAGCAC
10	F9	933	GAGACTAGTACCCGCTGGTAGGCTC	GAGACTAGTACCCGCTGGTAGGCTC
10	F10	934	GGACATAAACAGGACCGCTGAGAAG	CTTCTCAGCGGTCCTGTTTATGTCC
10	F11	935	AGGTTGTCCTCTATTGTTAGGGCGC	AGGTTGTCCTCTATTGTTAGGGCGC
10	F12	936	GACTATCCACCCGCCAAAGAAGGCA	TGCCTTCTTTGGCGGGTGGATAGTC
10	G1	937	GCTCTGGCTGTGCTTAATAGCCGCT	GCTCTGGCTGTGCTTAATAGCCGCT
10	G2	938	ATAAACAGGAAACGGAGGTGAGAGG	CCTCTCACCTCCGTTTCCTGTTTAT
10	G3	939	TCCAGAGTATGAGTGTCCCTTCTCT	TCCAGAGTATGAGTGTCCCTTCTCT
10	G4	940	GAAGTGAAGCTACCACCAATGGGAG	CTCCCATTGGTGGTAGCTTCACTTC
10	G5	941	TCCAGGGTGGCACGAGTAGTCTAGG	TCCAGGGTGGCACGAGTAGTCTAGG
10	G6	942	TGTAGAGGGCCACCGAAAGTGCTAG	CTAGCACTTTCGGTGGCCCTCTACA
10	G7	943	GTTCAGTGCCGCCTTTACGGCTTTT	GTTCAGTGCCGCCTTTACGGCTTTT
10	G8	944	TCGCCACATGGTGTGAGGAGGAAAG	CTTTCCTCCTCACACCATGTGGCGA
10	G9	945	TGAGCAGATCAGGGGCCCTATGTCA	TGAGCAGATCAGGGGCCCTATGTCA
10	G10	946	GCCTGGACACACCGAAGACAATCTC	GAGATTGTCTTCGGTGTGTCCAGGC
10	G11	947	TGATAGTCCGGTGCCCTCGGATTCT	TGATAGTCCGGTGCCCTCGGATTCT
10	G12	948	GGGGAAGAGTGGACGTACCGTGAAA	TTTCACGGTACGTCCACTCTTCCCC
10	H1	949	GTTATGCCTTATACGGCCTCGCCTC	GTTATGCCTTATACGGCCTCGCCTC
10	H2	950	AGAGAGGGAACGTGCCTATCTGGTG	CACCAGATAGGCACGTTCCCTCTCT
10	H3	951	TGGCTTCTGTCGTACTCCCGTGTTG	TGGCTTCTGTCGTACTCCCGTGTTG
10	H4	952	AGGGCTGGGAAGCTGAGAATGCTTT	AAAGCATTCTCAGCTTCCCAGCCCT
10	H5	953	CTTATCGGTTGGGCGTGCCTCATCT	CTTATCGGTTGGGCGTGCCTCATCT
10	H6	954	CACCTGGGAAGGCCCATATGAAGTC	GACTTCATATGGGCCTTCCCAGGTG
10	H7	955	GCTTCTATGGGGTTGCGCACCCATA	GCTTCTATGGGGTTGCGCACCCATA
10	H8	956	TCTGGCAACAGGACCCTTGCTCTAC	GTAGAGCAAGGGTCCTGTTGCCAGA
10	H9	957	TTGGTTGCCGAGCTGTAGTGCAGTT	TTGGTTGCCGAGCTGTAGTGCAGTT
10	H10	958	GAGACTGACCCTCATGTGCCATCCC	GGGATGGCACATGAGGGTCAGTCTC
10	H11	959	GATCTGTCGGTCGCGTCCTTAGCAG	GATCTGTCGGTCGCGTCCTTAGCAG
10	H12	960	AAATGACCCTATGTGGCTGCTCCCC	GGGGAGCAGCCACATAGGGTCATTT
11	A1	961	CCACCCAGTTTTACCTTCCGTCACT	CCACCCAGTTTTACCTTCCGTCACT
11	A2	962	GAACTACAACGGGGATCCTGAAGCA	TGCTTCAGGATCCCCGTTGTAGTTC
11	A3	963	TTTTCCCTAGGTCTGCGCATATCCC	TTTTCCCTAGGTCTGCGCATATCCC
11	A4	964	AGGAAAATGGGGTCCCTCTGCCAAA	TTTGGCAGAGGGACCCCATTTTCCT
11	A5	965	GCTGTGGCGTCTTCAGTTAGTCACA	GCTGTGGCGTCTTCAGTTAGTCACA
11	A6	966	AGAACTCCCGTGGGCTGACTACGAT	ATCGTAGTCAGCCCACGGGAGTTCT
11	A7	967	GACGTAGGGTCCTGCCCTTAAGGTT	GACGTAGGGTCCTGCCCTTAAGGTT
11	A8	968	GTATGGACGAGCTCGGACTACCTCC	GGAGGTAGTCCGAGCTCGTCCATAC
11	A9	969	CTGGCCTGTTTGCTACATAGGTGCC	CTGGCCTGTTTGCTACATAGGTGCC
11	A10	970	AAAGCGGAAGGCGTACTGAAAACCC	GGGTTTTCAGTACGCCTTCCGCTTT
11	A11	971	CCTTTGCCGGTACAGCCCTATAGGG	CCTTTGCCGGTACAGCCCTATAGGG
11	A12	972	AAGCACCCACCGGCTATGAACCAAT	ATTGGTTCATAGCCGGTGGGTGCTT
11	B1	973	CTCAGAGGCTCACTCACTGTCTGCA	CTCAGAGGCTCACTCACTGTCTGCA
11	B2	974	GGAGAACAGGGATTCCTGCGGGATA	TATCCCGCAGGAATCCCTGTTCTCC
11	B3	975	AGCATGGCATCTTATGTAGGCTCCC	AGCATGGCATCTTATGTAGGCTCCC
11	B4	976	TAGCAACAGCGGTACTCCCCTAAGC	GCTTAGGGGAGTACCGCTGTTGCTA
11	B5	977	GGGTGACATCTAGCCTCGTTCGTCA	GGGTGACATCTAGCCTCGTTCGTCA
11	B6	978	ACGAACCCCTCACCTAAAGAGAAGC	GCTTCTCTTTAGGTGAGGGGTTCGT
11	B7	979	TGTACTCTTGGGCTAGAGGGTCCTT	TGTACTCTTGGGCTAGAGGGTCCTT
11	B8	980	AGCTGCTCCAGAGGTCGAAATGCAC	GTGCATTTCGACCTCTGGAGCAGCT
11	B9	981	CTGGCGCCCATCCTATTTTGCTCTT	CTGGCGCCCATCCTATTTTGCTCTT
11	B10	982	AGCCGGACTCCAACTAGACGCAATC	GATTGCGTCTAGTTGGAGTCCGGCT
11	B11	983	ACCTGTATGCTCGCTCGCTAGGTCA	ACCTGTATGCTCGCTCGCTAGGTCA
11	B12	984	AGCAATATGGGAGAACCAAAAGCCC	GGGCTTTTGGTTCTCCCATATTGCT
11	C1	985	CTGGGTTTGGTGTGCTTAGCCACAC	CTGGGTTTGGTGTGCTTAGCCACAC
11	C2	986	TAGCCCTCTAGGACTGAGCCAGTCG	CGACTGGCTCAGTCCTAGAGGGCTA
11	C3	987	CCCAAGCCACTGCTTTGTTTTCCTC	CCCAAGCCACTGCTTTGTTTTCCTC
11	C4	988	ACCGTACATCGATAGGGGACCGACC	GGTCGGTCCCCTATCGATGTACGGT
11	C5	989	ACTCACTGGGTTCTAGTCCTGTGCG	ACTCACTGGGTTCTAGTCCTGTGCG
11	C6	990	AGACTCCTCGCCAAGAGAACACCTG	CAGGTGTTCTCTTGGCGAGGAGTCT
11	C7	991	GTTCCAGCGTGTACCGCCCTTTATG	GTTCCAGCGTGTACCGCCCTTTATG
11	C8	992	TGTGTGAGCTCTGGAGCCGGATAGA	TCTATCCGGCTCCAGAGCTCACACA
11	C9	993	ACCTAGTTCGGACTCACTGTCCCCG	ACCTAGTTCGGACTCACTGTCCCCG
11	C10	994	GAACTAGGACACGCACAACCGATCC	GGATCGGTTGTGCGTGTCCTAGTTC
11	C11	995	AGGTAGTCACCTAGCGCCGGTTTGA	AGGTAGTCACCTAGCGCCGGTTTGA
11	C12	996	CAGGCTACTGCTCGAACGAGATGCC	GGCATCTCGTTCGAGCAGTAGCCTG
11	D1	997	GCTGGTACTAGTCGGCAGAGCTCGA	GCTGGTACTAGTCGGCAGAGCTCGA
11	D2	998	CAAACTAGGGCGAGACGCTGGATCT	AGATCCAGCGTCTCGCCCTAGTTTG
11	D3	999	CATAGCGGTGGGCCTGTACTCTCTT	CATAGCGGTGGGCCTGTACTCTCTT
11	D4	1000	GTACAGCCAGACCTCAGGCCATAAC	GTTATGGCCTGAGGTCTGGCTGTAC
11	D5	1001	CCTGCATCGGGTCCATTAGTTTCCA	CCTGCATCGGGTCCATTAGTTTCCA
11	D6	1002	CCCGGAACCATAGGGGCACCTAATA	TATTAGGTGCCCCTATGGTTCCGGG
11	D7	1003	CTTTTCGGGTCTAGCAGTGGAGGCT	CTTTTCGGGTCTAGCAGTGGAGGCT
11	D8	1004	TCAACTGGGAGGAAACCACTGATAC	GTATCAGTGGTTTCCTCCCAGTTGA
11	D9	1005	TCTTATGGTGTCCGTAGTTGCCAGC	TCTTATGGTGTCCGTAGTTGCCAGC
11	D10	1006	GGCTCAGACTCACGGCTAAGCTGAT	ATCAGCTTAGCCGTGAGTCTGAGCC
11	D11	1007	AGCAGAGTCGGCGCTGGTAGTTCTA	AGCAGAGTCGGCGCTGGTAGTTCTA
11	D12	1008	AGGCAGGAGTAGTCACTCCGGATAC	GTATCCGGAGTGACTACTCCTGCCT
11	E1	1009	GTGACTTACTGTGTAGGGGTCCAGC	GTGACTTACTGTGTAGGGGTCCAGC
11	E2	1010	TGCCCCTCTGGGTGCAGTAATGAAC	GTTCATTACTGCACCCAGAGGGGCA
11	E3	1011	CAGGGCAGAGACCCTTCGAGTCTTC	CAGGGCAGAGACCCTTCGAGTCTTC
11	E4	1012	TCCCAGACCACGAAGCGGGATACTA	TAGTATCCCGCTTCGTGGTCTGGGA
11	E5	1013	TACACTGGGTGAGGGCTTCTGCCTA	TACACTGGGTGAGGGCTTCTGCCTA
11	E6	1014	GGTAGGCATAGGATCCCACTCGACC	GGTCGAGTGGGATCCTATGCCTACC
11	E7	1015	GAGTCTGTGCCTTTCCTCGATGGTG	GAGTCTGTGCCTTTCCTCGATGGTG
11	E8	1016	GCTAGCGTAGGACTGTCACTCCAGC	GCTGGAGTGACAGTCCTACGCTAGC
11	E9	1017	CCTGGGTAGAGAGCTTGGGGTTCAC	CCTGGGTAGAGAGCTTGGGGTTCAC
11	E10	1018	AGTACCACCTGGGCGCAGATGAAAA	TTTTCATCTGCGCCCAGGTGGTACT
11	E11	1019	ATGTCAGGTTTTGTTCGTTGGCCCT	ATGTCAGGTTTTGTTCGTTGGCCCT
11	E12	1020	TTGGGCCACAAACAACAGACACCTG	CAGGTGTCTGTTGTTTGTGGCCCAA
11	F1	1021	GCTGTCTTACTGTACCGGTGCATCC	GCTGTCTTACTGTACCGGTGCATCC
11	F2	1022	AGTCACTGGACGCTGCGAGATAACC	GGTTATCTCGCAGCGTCCAGTGACT
11	F3	1023	CTAGTGATCTGTTGGTGTGGCGGCT	CTAGTGATCTGTTGGTGTGGCGGCT
11	F4	1024	TCCAAGGGACTGACATACGAGGTAC	GTACCTCGTATGTCAGTCCCTTGGA
11	F5	1025	GTCTTTTCGCCTTGGCTGGTCTTTG	GTCTTTTCGCCTTGGCTGGTCTTTG
11	F6	1026	GGAGCTAACAAACCAAACCGCAGGT	ACCTGCGGTTTGGTTTGTTAGCTCC
11	F7	1027	GGTCATGCAGGGATTCGTCCGTAGT	GGTCATGCAGGGATTCGTCCGTAGT
11	F8	1028	TCGACACTCTGGACGAGCACCTGAA	TTCAGGTGCTCGTCCAGAGTGTCGA
11	F9	1029	GCACTAATCCATGTAGCTCCCACCC	GCACTAATCCATGTAGCTCCCACCC
11	F10	1030	GGAGCACTTAATGCCAACCAGACCC	GGGTCTGGTTGGCATTAAGTGCTCC
11	F11	1031	CCACACATTGCCTAGCGTCTCCACT	CCACACATTGCCTAGCGTCTCCACT
11	F12	1032	AGACCGTCACCACTGGATGCCATAC	GTATGGCATCCAGTGGTGACGGTCT
11	G1	1033	CCTACCAGCGCCTCCGGTATTGTAT	CCTACCAGCGCCTCCGGTATTGTAT
11	G2	1034	GCCAAGAGAGGAATCTGCCCCTCAA	TTGAGGGGCAGATTCCTCTCTTGGC
11	G3	1035	TCTGTCTACTCCTGAGACCAGGCTC	TCTGTCTACTCCTGAGACCAGGCTC
11	G4	1036	AGCAGAGAAACGCCGTCACACAGAG	CTCTGTGTGACGGCGTTTCTCTGCT
11	G5	1037	ATGACTTGGGGTCCAGCTGTCGTTC	ATGACTTGGGGTCCAGCTGTCGTTC
11	G6	1038	AAGGGGAAATGCCCGGTCTAGAAAC	GTTTCTAGACCGGGCATTTCCCCTT
11	G7	1039	AAGTGCGCAGAGTCAGTTCCCTAGC	AAGTGCGCAGAGTCAGTTCCCTAGC
11	G8	1040	GGGCACGCCGGAGATCAATAAACCT	AGGTTTATTGATCTCCGGCGTGCCC
11	G9	1041	CAGGCCAGACCCTAGGACTCTCTTG	CAGGCCAGACCCTAGGACTCTCTTG
11	G10	1042	CCCAGGCGACCGCTAAGGGATAAAA	TTTTATCCCTTAGCGGTCGCCTGGG
11	G11	1043	ACCTAGTAGGGAGGCTCCGCTCATG	ACCTAGTAGGGAGGCTCCGCTCATG
11	G12	1044	CCTAAGTGGCCGGGACCAAACTAGA	TCTAGTTTGGTCCCGGCCACTTAGG
11	H1	1045	GTTACTTTGGCTCGTAGCTCTCTGC	GTTACTTTGGCTCGTAGCTCTCTGC
11	H2	1046	CTAGTCAGTGGGACTCTGCTGGCTC	GAGCCAGCAGAGTCCCACTGACTAG
11	H3	1047	GGCTTAGGATGGCCTCTAGCTCACG	GGCTTAGGATGGCCTCTAGCTCACG
11	H4	1048	GCCGAACTAAAGCATGCTACCCTGC	GCAGGGTAGCATGCTTTAGTTCGGC
11	H5	1049	GTCATGGTCGTACCGTCCCATAGGG	GTCATGGTCGTACCGTCCCATAGGG
11	H6	1050	CCTAGACGGCCAGGCTAAGTCACTC	GAGTGACTTAGCCTGGCCGTCTAGG
11	H7	1051	GAGGGTAGATCCGGCCTATTCACCC	GAGGGTAGATCCGGCCTATTCACCC
11	H8	1052	ACCTGACCGCTACGCAAGCTGAATC	GATTCAGCTTGCGTAGCGGTCAGGT
11	H9	1053	GTTTTGGTGCATCTCTGATCCCCAG	GTTTTGGTGCATCTCTGATCCCCAG
11	H10	1054	AGAGACGTAAGCAGGGAGGCTTACG	CGTAAGCCTCCCTGCTTACGTCTCT
11	H11	1055	CCCGTAGAGAGTGTCGGCTTCCTTA	CCCGTAGAGAGTGTCGGCTTCCTTA
11	H12	1056	GCTGGGACGATCTGTATCAGCACCC	GGGTGCTGATACAGATCGTCCCAGC
12	A1	1057	CATTCTCGCCACAGCCGTCTTAGCT	CATTCTCGCCACAGCCGTCTTAGCT
12	A2	1058	GAATGCTACGGCCACCAAACGAGGT	ACCTCGTTTGGTGGCCGTAGCATTC
12	A3	1059	GTATGGTAGGTGCCAGCGGGTACTT	GTATGGTAGGTGCCAGCGGGTACTT
12	A4	1060	TGGAGACCAACTGAAACCCGTAACC	GGTTACGGGTTTCAGTTGGTCTCCA
12	A5	1061	GCATTTAGGGCATTGGGGTGCCATC	GCATTTAGGGCATTGGGGTGCCATC
12	A6	1062	TACCAGCCTGCGCTGCCTAAAAGAG	CTCTTTTAGGCAGCGCAGGCTGGTA
12	A7	1063	GCTGCTGCCAGCGTTCTTCTCAATT	GCTGCTGCCAGCGTTCTTCTCAATT
12	A8	1064	AGAAACGCTACACACCCTAAACGGG	CCCGTTTAGGGTGTGTAGCGTTTCT
12	A9	1065	GGTGTCCTATTAATGCGTCCCCGGT	GGTGTCCTATTAATGCGTCCCCGGT
12	A10	1066	AAACTAGAAGGGCGGACTTCACGCC	GGCGTGAAGTCCGCCCTTCTAGTTT
12	A11	1067	AGGGGTGGCATCGGCTTGTTTACTC	AGGGGTGGCATCGGCTTGTTTACTC
12	A12	1068	CCCTACCTCACTGGGGCTAGTACGA	TCGTACTAGCCCCAGTGAGGTAGGG
12	B1	1069	CTCGGTCAGGTTCAGACCTACAGCC	CTCGGTCAGGTTCAGACCTACAGCC
12	B2	1070	GGTCAACTTGACAGGGGCACATACC	GGTATGTGCCCCTGTCAAGTTGACC
12	B3	1071	GGTGTCTATATGCCTTCTGCGTCGC	GGTGTCTATATGCCTTCTGCGTCGC
12	B4	1072	GATATGTACTGAGGCCCTAGCTGCC	GGCAGCTAGGGCCTCAGTACATATC
12	B5	1073	GTTAAGGTCGTCCCGTCCGTTGCTA	GTTAAGGTCGTCCCGTCCGTTGCTA
12	B6	1074	GAGCAGGGTTAGAGGTACCTGTCCC	GGGACAGGTACCTCTAACCCTGCTC
12	B7	1075	AGGTTATCGCTCTGGCCGCGTCTTA	AGGTTATCGCTCTGGCCGCGTCTTA
12	B8	1076	ACCGACTTAACTGGGAAACAGCAGC	GCTGCTGTTTCCCAGTTAAGTCGGT
12	B9	1077	CAACCCTCTATCCGCCTCTCCACTA	CAACCCTCTATCCGCCTCTCCACTA
12	B10	1078	AAGTATCTGCACCTGGGCTGATCCC	GGGATCAGCCCAGGTGCAGATACTT
12	B11	1079	TGGGAGGAGTGTCACCCTTCCAAGT	TGGGAGGAGTGTCACCCTTCCAAGT
12	B12	1080	TCGAGCAACGATAAGCCAGCACTGC	GCAGTGCTGGCTTATCGTTGCTCGA
12	C1	1081	TTGTGGTCGGTCCTTATGCCGTACC	TTGTGGTCGGTCCTTATGCCGTACC
12	C2	1082	GACTCTGAGGTGCCCTGAGCATGAT	ATCATGCTCAGGGCACCTCAGAGTC
12	C3	1083	GTTGGGTTGGTGTCACCTCGCCTAA	GTTGGGTTGGTGTCACCTCGCCTAA
12	C4	1084	GGTAGGAGATTGAACCCCACAGAGG	CCTCTGTGGGGTTCAATCTCCTACC
12	C5	1085	CAGCGCTCTTGGCGTCTTGTTGTTC	CAGCGCTCTTGGCGTCTTGTTGTTC
12	C6	1086	ACGACCCTGGTGTCAGCAACCTAAC	GTTAGGTTGCTGACACCAGGGTCGT
12	C7	1087	GTATGTTCCTGGCGAGTCGGCCTAT	GTATGTTCCTGGCGAGTCGGCCTAT
12	C8	1088	GAGCGTCACTAAGGAGTAGCCTGAC	GTCAGGCTACTCCTTAGTGACGCTC
12	C9	1089	TAGCTCTCCGTCATGCTGAGACTCC	TAGCTCTCCGTCATGCTGAGACTCC
12	C10	1090	AGCTAGGTGCAACAGTGCAGGTAAC	GTTACCTGCACTGTTGCACCTAGCT
12	C11	1091	GATTGCTTGGTCTCAGATAGCCCCA	GATTGCTTGGTCTCAGATAGCCCCA
12	C12	1092	GGGCCAGGGCAGTCACTTAGACATA	TATGTCTAAGTGACTGCCCTGGCCC
12	D1	1093	AAGTAGTTTGCAGTCGGCCTGCTCT	AAGTAGTTTGCAGTCGGCCTGCTCT
12	D2	1094	AGAAAGGCTGAGGCATCACCCAAAA	TTTTGGGTGATGCCTCAGCCTTTCT
12	D3	1095	GTTGGTTCCGGTCGGACTCATAGGC	GTTGGTTCCGGTCGGACTCATAGGC
12	D4	1096	ACTGGCCAACTGGCGTGATACAAAC	GTTTGTATCACGCCAGTTGGCCAGT
12	D5	1097	ATGTTTGTTTACTGGCCCGGCTGGT	ATGTTTGTTTACTGGCCCGGCTGGT
12	D6	1098	GAGGCCGCACCTATACTTAGGAGAC	GTCTCCTAAGTATAGGTGCGGCCTC
12	D7	1099	GTTGCCTTGCAGTACCCCACGGTAA	GTTGCCTTGCAGTACCCCACGGTAA
12	D8	1100	AGCTGCTGCTAAGCATACGGTCCAC	GTGGACCGTATGCTTAGCAGCAGCT
12	D9	1101	GTTTATTAGCTCGCGGCTTGCCCTG	GTTTATTAGCTCGCGGCTTGCCCTG
12	D10	1102	TGGGATCATCAGGGTACGACAACCC	GGGTTGTCGTACCCTGATGATCCCA
12	D11	1103	GCTTTTGTCTCGGCTGGGTATGCTG	GCTTTTGTCTCGGCTGGGTATGCTG
12	D12	1104	GAGGCACCGAGAACTAACACACTCA	TGAGTGTGTTAGTTCTCGGTGCCTC
12	E1	1105	GTTAGGCCTCCCACGGTAGCTTATG	GTTAGGCCTCCCACGGTAGCTTATG
12	E2	1106	GCCTGGTCTGCTAAACGAGACACCA	TGGTGTCTCGTTTAGCAGACCAGGC
12	E3	1107	ATAGTGGGATCCACGTGGGGTCTCT	ATAGTGGGATCCACGTGGGGTCTCT
12	E4	1108	TACCCAGAGAGGGCAAAGTTCCGAC	GTCGGAACTTTGCCCTCTCTGGGTA
12	E5	1109	GTGTGTCGTCCTAGAGGAGCATTGC	GTGTGTCGTCCTAGAGGAGCATTGC
12	E6	1110	GCCGACGCGAAACCTACAAGAGACT	AGTCTCTTGTAGGTTTCGCGTCGGC
12	E7	1111	TGTGGTGTTCCATCTATCCACTGGC	TGTGGTGTTCCATCTATCCACTGGC
12	E8	1112	TAGGGCCCAGCAGCACTCAGTCATA	TATGACTGAGTGCTGCTGGGCCCTA
12	E9	1113	TCTTCCTCTCCCGATTCTCTTGGTA	TCTTCCTCTCCCGATTCTCTTGGTA
12	E10	1114	CAGTGGCGGACCCAAACTAGATAGC	GCTATCTAGTTTGGGTCCGCCACTG
12	E11	1115	GAGTCTGGTAGGGACCGCAGTTACC	GAGTCTGGTAGGGACCGCAGTTACC
12	E12	1116	TAATATAGTCCAGAGGGCCGCAGGC	GCCTGCGGCCCTCTGGACTATATTA
12	F1	1117	ACTCTAGGGCTTTGCTGGCTGGTAT	ACTCTAGGGCTTTGCTGGCTGGTAT
12	F2	1118	GATACTGGCACCTAGACTGACGAGA	TCTCGTCAGTCTAGGTGCCAGTATC
12	F3	1119	GGTCTTTCCGCGGCTCTTAGGGATA	GGTCTTTCCGCGGCTCTTAGGGATA
12	F4	1120	AGTGGCCTATAAGACCTGTAGGGCT	AGCCCTACAGGTCTTATAGGCCACT
12	F5	1121	AGATTCGGTCCTCTCCTATGTGGGT	AGATTCGGTCCTCTCCTATGTGGGT
12	F6	1122	GGTAGGGGAGCGCCACATAAGTGAT	ATCACTTATGTGGCGCTCCCCTACC
12	F7	1123	CCTAGTGTTGTAGGTGGTACCGCCG	CCTAGTGTTGTAGGTGGTACCGCCG
12	F8	1124	TGGGAAAATCCTACCGCCATAGCCC	GGGCTATGGCGGTAGGATTTTCCCA
12	F9	1125	GTAGTTGATAGCCACCCGCCAGAGG	GTAGTTGATAGCCACCCGCCAGAGG
12	F10	1126	CAGGGCGACGAGGCTATAGGATGTG	CACATCCTATAGCCTCGTCGCCCTG
12	F11	1127	CTCATGTGTTGCCTTGATGCTCTCC	CTCATGTGTTGCCTTGATGCTCTCC
12	F12	1128	CTGAGTGCATGAGGCCTACCATGAC	GTCATGGTAGGCCTCATGCACTCAG
12	G1	1129	AATCGTTTCCACCGTCCCTCTCACC	AATCGTTTCCACCGTCCCTCTCACC
12	G2	1130	AGTCACAACTAGACCGACCCCGACT	AGTCGGGGTCGGTCTAGTTGTGACT
12	G3	1131	ATAGTGTCTCATTGGTCGGGGCTGC	ATAGTGTCTCATTGGTCGGGGCTGC
12	G4	1132	CTGTGATACCCGGGGACCTATCTGC	GCAGATAGGTCCCCGGGTATCACAG
12	G5	1133	CTCCGGTCTCGCAGCCAGTATATCA	CTCCGGTCTCGCAGCCAGTATATCA
12	G6	1134	CAGAGCCATGCGGAGAGTACCAACT	AGTTGGTACTCTCCGCATGGCTCTG
12	G7	1135	GGGCACGCTGTATGTTCTAGTCCCG	GGGCACGCTGTATGTTCTAGTCCCG
12	G8	1136	GGATGCTAGAGCCTAGGGGAATTCC	GGAATTCCCCTAGGCTCTAGCATCC
12	G9	1137	GTGTGCCGTTTTATCCCACAGGCTG	GTGTGCCGTTTTATCCCACAGGCTG
12	G10	1138	TGTACTACAATGGAACGCCCACGGC	GCCGTGGGCGTTCCATTGTAGTACA
12	G11	1139	ATCTCGCCTAGCCTAGACCAGAGCA	ATCTCGCCTAGCCTAGACCAGAGCA
12	G12	1140	TACCCGACATCGGGGAAGAAACAAC	GTTGTTTCTTCCCCGATGTCGGGTA
12	H1	1141	GTGAGTTTGGTCCTTGGGCTTCTAC	GTGAGTTTGGTCCTTGGGCTTCTAC
12	H2	1142	AAGCTTACCGAAGAGACGCAGCCAC	GTGGCTGCGTCTCTTCGGTAAGCTT
12	H3	1143	GAGTCGTGTCAGGCTTGCTTCAGTA	GAGTCGTGTCAGGCTTGCTTCAGTA
12	H4	1144	AGAGTGAAGTACTCACAGAGCCCGC	GCGGGCTCTGTGAGTACTTCACTCT
12	H5	1145	GGGACAGTCTTACTACCCGTCCCAG	GGGACAGTCTTACTACCCGTCCCAG
12	H6	1146	CCTGCACCAGACGAGCAGGTAAAAC	GTTTTACCTGCTCGTCTGGTGCAGG
12	H7	1147	GAGTTGCTAAGTTGTCCTGCCCACT	GAGTTGCTAAGTTGTCCTGCCCACT
12	H8	1148	ACGAACGTGAGGACTGCCACTAACT	AGTTAGTGGCAGTCCTCACGTTCGT
12	H9	1149	ATCTCCCGTGTATAGCCTCTGTCAC	ATCTCCCGTGTATAGCCTCTGTCAC
12	H10	1150	ATGGAATGGGCGCTAACCCATAGAC	GTCTATGGGTTAGCGCCCATTCCAT
12	H11	1151	TAAGTCCGTCAGAGCCCCTCTCTTG	TAAGTCCGTCAGAGCCCCTCTCTTG
12	H12	1152	AGGACTCAGGACCGTACCTAAGCAA	TTGCTTAGGTACGGTCCTGAGTCCT
13	A1	1153	GTAGCTGGGACCCTCTATAGTAGCT	GTAGCTGGGACCCTCTATAGTAGCT
13	A2	1154	CAAGGGGCGAAATGAGACTACACCT	AGGTGTAGTCTCATTTCGCCCCTTG
13	A3	1155	CTGTGGCAGTATCCTCAGGCAGTTA	CTGTGGCAGTATCCTCAGGCAGTTA
13	A4	1156	GCATAATGGAGCCAGCTGAACGCTC	GAGCGTTCAGCTGGCTCCATTATGC
13	A5	1157	TGCCGTTTTGCAGTCAGATGGCTCT	TGCCGTTTTGCAGTCAGATGGCTCT
13	A6	1158	GAGCCCTTAGAGACGGCTAATGACC	GGTCATTAGCCGTCTCTAAGGGCTC
13	A7	1159	TTCTCTTACTCCAAGCGCCCAGTGC	TTCTCTTACTCCAAGCGCCCAGTGC
13	A8	1160	GTGGCTCCCAAGGACACCCTATCTC	GAGATAGGGTGTCCTTGGGAGCCAC
13	A9	1161	GGTGTTTATCTCCCGGTAGGCTGAG	GGTGTTTATCTCCCGGTAGGCTGAG
13	A10	1162	TATAAGAGGTCAGCGGGGCGCACTA	TAGTGCGCCCCGCTGACCTCTTATA
13	A11	1163	TCATACCTGGCGGTTCCCAGGTTTG	TCATACCTGGCGGTTCCCAGGTTTG
13	A12	1164	TGGAGCGCCTAGGAAATGTAGGACG	CGTCCTACATTTCCTAGGCGCTCCA
13	B1	1165	ACATTATTGCGTCCTCTCGTGGCCC	ACATTATTGCGTCCTCTCGTGGCCC
13	B2	1166	ACTGAACCTAAGGAGCGCACGTCCT	AGGACGTGCGCTCCTTAGGTTCAGT
13	B3	1167	AGTACTCCAGCTGGTATACAGGGCC	AGTACTCCAGCTGGTATACAGGGCC
13	B4	1168	GCTACATCAAGCCTGAGGCTGGAAT	ATTCCAGCCTCAGGCTTGATGTAGC
13	B5	1169	GGCCGTGAGCTTCTATGGTACTGCA	GGCCGTGAGCTTCTATGGTACTGCA
13	B6	1170	TACTGGAAAGGAATCCCCGAAACCC	GGGTTTCGGGGATTCCTTTCCAGTA
13	B7	1171	CGTGTCCTCACGTTGTGCGTCATCT	CGTGTCCTCACGTTGTGCGTCATCT
13	B8	1172	ACAATGGCCCTGAAAACAAGCGCTC	GAGCGCTTGTTTTCAGGGCCATTGT
13	B9	1173	AGTTCCTCCCTACTTAAGTCAGGGC	AGTTCCTCCCTACTTAAGTCAGGGC
13	B10	1174	GAACCAAATGTACGGCAGCTACCCC	GGGGTAGCTGCCGTACATTTGGTTC
13	B11	1175	GCTGGTGGGGAGCTCCTATTACAGG	GCTGGTGGGGAGCTCCTATTACAGG
13	B12	1176	TAGGATGGGCCGGGTAGGGTATATC	GATATACCCTACCCGGCCCATCCTA
13	C1	1177	TGCCTGGTATCCATGGGTTCAGGAC	TGCCTGGTATCCATGGGTTCAGGAC
13	C2	1178	TAGCCTATAGCTGGGACCGACCTCG	CGAGGTCGGTCCCAGCTATAGGCTA
13	C3	1179	TGTCCTAGACTATCTGGCCGTTGCC	TGTCCTAGACTATCTGGCCGTTGCC
13	C4	1180	ACGCTGATCCGCTAAGAAACCAGCC	GGCTGGTTTCTTAGCGGATCAGCGT
13	C5	1181	GGGTCGGCAGTTTAGGTCTACGAGC	GGGTCGGCAGTTTAGGTCTACGAGC
13	C6	1182	GGCGTCCAAGGGGAGATCACTAACA	TGTTAGTGATCTCCCCTTGGACGCC
13	C7	1183	TAGAGTCGCTTTCTCTTGGGGCCAG	TAGAGTCGCTTTCTCTTGGGGCCAG
13	C8	1184	AGACAGGTTGATGGTCTGGAGGCAG	CTGCCTCCAGACCATCAACCTGTCT
13	C9	1185	TTTGTTGTCCGATGCCCTTAGGCCA	TTTGTTGTCCGATGCCCTTAGGCCA
13	C10	1186	TAGTCGTGCACAGAGGCAACCTAGC	GCTAGGTTGCCTCTGTGCACGACTA
13	C11	1187	TTCAAGTTGCCTCAGCCGTCTCCAT	TTCAAGTTGCCTCAGCCGTCTCCAT
13	C12	1188	ACAGGCAGGCAGCCTTACCAACTAT	ATAGTTGGTAAGGCTGCCTGCCTGT
13	D1	1189	GGAGGTAGAGCATCCTTACCCGTCA	GGAGGTAGAGCATCCTTACCCGTCA
13	D2	1190	GAGGAGTGCCATCCACCAAATGAGC	GCTCATTTGGTGGATGGCACTCCTC
13	D3	1191	GTCGAGCTTTGGGGTCACCCTATTC	GTCGAGCTTTGGGGTCACCCTATTC
13	D4	1192	GTAGAACACTGACGAGCGCTGAAGG	CCTTCAGCGCTCGTCAGTGTTCTAC
13	D5	1193	CCGGTCTGTCGGACCGTTGTAGTTC	CCGGTCTGTCGGACCGTTGTAGTTC
13	D6	1194	GGGGAGACCCCAATGTCAACTCTCT	AGAGAGTTGACATTGGGGTCTCCCC
13	D7	1195	CATTAGAGCTCTCCCCAAGCTCGGC	CATTAGAGCTCTCCCCAAGCTCGGC
13	D8	1196	TCCCAGGCCGATAGGGAACTTACCT	AGGTAAGTTCCCTATCGGCCTGGGA
13	D9	1197	TCTCCGTCTTCATGTTAGCGGCCAT	TCTCCGTCTTCATGTTAGCGGCCAT
13	D10	1198	CAATAGGGGAACCGAGTCGAGCTGG	CCAGCTCGACTCGGTTCCCCTATTG
13	D11	1199	TTGGCTCTATGAGTCCCACTCTGGG	TTGGCTCTATGAGTCCCACTCTGGG
13	D12	1200	CCGGGACTATAAGCCGCTGGCATAC	GTATGCCAGCGGCTTATAGTCCCGG
13	E1	1201	CTCCGTATGGTTAGTGGGCATCCCG	CTCCGTATGGTTAGTGGGCATCCCG
13	E2	1202	CACACCTAACTGGGAACCTGCTACG	CGTAGCAGGTTCCCAGTTAGGTGTG
13	E3	1203	TGGTCAGATCCCAGGTAGTTTCGGT	TGGTCAGATCCCAGGTAGTTTCGGT
13	E4	1204	TGAGCACAACGACATACCGCGACAC	GTGTCGCGGTATGTCGTTGTGCTCA
13	E5	1205	AGGCTTTGTCTACATCCGTCGTGGC	AGGCTTTGTCTACATCCGTCGTGGC
13	E6	1206	GAAAGACGCTCTCAGCACCACTGGT	ACCAGTGGTGCTGAGAGCGTCTTTC
13	E7	1207	CCTTAAGGTACCCCTAGTCGGGTGT	CCTTAAGGTACCCCTAGTCGGGTGT
13	E8	1208	ACGCCGCTACGGCTATAGAGAACCT	AGGTTCTCTATAGCCGTAGCGGCGT
13	E9	1209	CTGATTGTGCTCTGGGACCCATCCT	CTGATTGTGCTCTGGGACCCATCCT
13	E10	1210	GCCGGGCACACAGTGTATAGACACA	TGTGTCTATACACTGTGTGCCCGGC
13	E11	1211	GGGGTCGTTCCAGGTACTGTTACTC	GGGGTCGTTCCAGGTACTGTTACTC
13	E12	1212	CATGAGGGCCGATGGACGGGATATG	CATATCCCGTCCATCGGCCCTCATG
13	F1	1213	GAGGTGGCTTTTCCCATCTGGATCT	GAGGTGGCTTTTCCCATCTGGATCT
13	F2	1214	AGACAAAGAGGTCGCGGATGAAAGC	GCTTTCATCCGCGACCTCTTTGTCT
13	F3	1215	GTCACGGTCGTCTGGTGGTTTGTGA	GTCACGGTCGTCTGGTGGTTTGTGA
13	F4	1216	ACAAGGACGTACCCCACCACACAAA	TTTGTGTGGTGGGGTACGTCCTTGT
13	F5	1217	TGTCGAGTTCTCAGCCATAGGCCAC	TGTCGAGTTCTCAGCCATAGGCCAC
13	F6	1218	TAGTGAAGGCAATGCCAAGCAACCC	GGGTTGCTTGGCATTGCCTTCACTA
13	F7	1219	AGTATTAGGTAGGCTTTGCCCGCTC	AGTATTAGGTAGGCTTTGCCCGCTC
13	F8	1220	ACACAGAGGAAAACGGCTACCTACG	CGTAGGTAGCCGTTTTCCTCTGTGT
13	F9	1221	GGAAGCCTAGCCTGTTCTCCATACC	GGAAGCCTAGCCTGTTCTCCATACC
13	F10	1222	TAGAGAGTGAGCCGACATCCGGGAT	ATCCCGGATGTCGGCTCACTCTCTA
13	F11	1223	AGAGGTCATCGTTCGTGCGTCTGGT	AGAGGTCATCGTTCGTGCGTCTGGT
13	F12	1224	ACCCTGTAGCATGGGGTAGCAATCC	GGATTGCTACCCCATGCTACAGGGT
13	G1	1225	GTGTAGCGTGTGAGACCAGACTCCC	GTGTAGCGTGTGAGACCAGACTCCC
13	G2	1226	TCCAAGGACGGCTGCCTAAACAACT	AGTTGTTTAGGCAGCCGTCCTTGGA
13	G3	1227	GTCGGGGTGCCGCTGTTATAGTCAT	GTCGGGGTGCCGCTGTTATAGTCAT
13	G4	1228	GACGCTGGGACAAGATCGCGAAACT	AGTTTCGCGATCTTGTCCCAGCGTC
13	G5	1229	CGCCTTTATTTGCAGTGCCTCTCCG	CGCCTTTATTTGCAGTGCCTCTCCG
13	G6	1230	AGCTGGTGTACCTAGACAGCAAGAG	CTCTTGCTGTCTAGGTACACCAGCT
13	G7	1231	GTGAGATAGGCGCCCCTTCATAGGT	GTGAGATAGGCGCCCCTTCATAGGT
13	G8	1232	TGTACTACCAGGCAGTGCCCAGATC	GATCTGGGCACTGCCTGGTAGTACA
13	G9	1233	GCCAGGTTTGGGTCAGAGCATTCGA	GCCAGGTTTGGGTCAGAGCATTCGA
13	G10	1234	TATGTCGGGCACTACCCACTGAGCA	TGCTCAGTGGGTAGTGCCCGACATA
13	G11	1235	TTCGCTTTCGTCGTGAGTCCTCCTT	TTCGCTTTCGTCGTGAGTCCTCCTT
13	G12	1236	GGGACTAGCCCCTTTACACCCGAAC	GTTCGGGTGTAAAGGGGCTAGTCCC
13	H1	1237	AGTCTCATGTTTAGGGGCCGGTCAT	AGTCTCATGTTTAGGGGCCGGTCAT
13	H2	1238	TGCAGCACATGCAAGCTAAGACCTG	CAGGTCTTAGCTTGCATGTGCTGCA
13	H3	1239	GCTTGGAGTGGCCCATCAAGGTACT	GCTTGGAGTGGCCCATCAAGGTACT
13	H4	1240	AGCAAAGCTGATGTAGCCCTAGCGG	CCGCTAGGGCTACATCAGCTTTGCT
13	H5	1241	TGCACTAGCTGCCATGGCTATCAGC	TGCACTAGCTGCCATGGCTATCAGC
13	H6	1242	ATAGGCTGGGAAACTGCCACGAAAA	TTTTCGTGGCAGTTTCCCAGCCTAT
13	H7	1243	TTCCCATCCGTGCCTGGATTTGTCA	TTCCCATCCGTGCCTGGATTTGTCA
13	H8	1244	AGGATACATATGGGGACCGCTCCTC	GAGGAGCGGTCCCCATATGTATCCT
13	H9	1245	CTCAGCACCTTTCCAGGTGACGTCT	CTCAGCACCTTTCCAGGTGACGTCT
13	H10	1246	GAGATAATCATAGGCCAGGGGCACT	AGTGCCCCTGGCCTATGATTATCTC
13	H11	1247	GGGTAGGGGTTCGTCACAGTCACTG	GGGTAGGGGTTCGTCACAGTCACTG
13	H12	1248	AAGGTGAGTAGTAGGGCACCCTCAG	CTGAGGGTGCCCTACTACTCACCTT
14	A1	1249	GTCAGCTTCTGACTTAGCCGTCCTA	GTCAGCTTCTGACTTAGCCGTCCTA
14	A2	1250	GGGCAGGGTCCCCTAACTAGTCATG	CATGACTAGTTAGGGGACCCTGCCC
14	A3	1251	GCCTGCAGGTGTTATAGCTCATCCG	GCCTGCAGGTGTTATAGCTCATCCG
14	A4	1252	GAAGAATCCTGGCTGAAGGACTAGG	CCTAGTCCTTCAGCCAGGATTCTTC
14	A5	1253	GTATAGGTCTACCGCAGCCCGTTGG	GTATAGGTCTACCGCAGCCCGTTGG
14	A6	1254	AGCTGAAATGCCAGAGCGGTAACAC	GTGTTACCGCTCTGGCATTTCAGCT
14	A7	1255	GACATTCGGGAGCTTGGTCCGTCTC	GACATTCGGGAGCTTGGTCCGTCTC
14	A8	1256	AAACGACTGGCGAGCTACTCGGTAC	GTACCGAGTAGCTCGCCAGTCGTTT
14	A9	1257	TTTCGATCTCTCCGTAGGGTGCTGC	TTTCGATCTCTCCGTAGGGTGCTGC
14	A10	1258	GCAAACCCGGCCACTGGAACAAAAT	ATTTTGTTCCAGTGGCCGGGTTTGC
14	A11	1259	CCTTACCTCGTGCCGGCATTTCCTA	CCTTACCTCGTGCCGGCATTTCCTA
14	A12	1260	TAGAGACAGGCCCGACCTACAGTAA	TTACTGTAGGTCGGGCCTGTCTCTA
14	B1	1261	TATGGTATGGTGGCGCCTTCCTGTT	TATGGTATGGTGGCGCCTTCCTGTT
14	B2	1262	AGGCTACACCACACCTGAATTGAGC	GCTCAATTCAGGTGTGGTGTAGCCT
14	B3	1263	CAGTCCTACTCCTTCGTTCCATGGG	CAGTCCTACTCCTTCGTTCCATGGG
14	B4	1264	GTGCCGACTATGACGGAAAGCACCT	AGGTGCTTTCCGTCATAGTCGGCAC
14	B5	1265	GAGTGAGTTCCCCTAAGCTCCGCAT	GAGTGAGTTCCCCTAAGCTCCGCAT
14	B6	1266	ACAAGAGGTACCGCAGATCGCAAGC	GCTTGCGATCTGCGGTACCTCTTGT
14	B7	1267	GGTCGTGCATCTAGTACCAAGGCCT	GGTCGTGCATCTAGTACCAAGGCCT
14	B8	1268	TGGCCACCACGAACCTCAATGGATC	GATCCATTGAGGTTCGTGGTGGCCA
14	B9	1269	CCCAGCATTGTGCAGGGAGTTCTTT	CCCAGCATTGTGCAGGGAGTTCTTT
14	B10	1270	TAGTGGCAATACCCAAAGGGTGCCT	AGGCACCCTTTGGGTATTGCCACTA
14	B11	1271	TCTTTGCCCTTGGGACCTTTCCTTG	TCTTTGCCCTTGGGACCTTTCCTTG
14	B12	1272	CCGGGACCACCTCTAACAAAGGCTA	TAGCCTTTGTTAGAGGTGGTCCCGG
14	C1	1273	TGCGGTGTTGGTTATGTTTCCTCCT	TGCGGTGTTGGTTATGTTTCCTCCT
14	C2	1274	AGCTGAAGGCCACGGGTAAATCACT	AGTGATTTACCCGTGGCCTTCAGCT
14	C3	1275	GGGCAGTGATCCCTTAGCCGTAGAG	GGGCAGTGATCCCTTAGCCGTAGAG
14	C4	1276	GGACCGGAATACTAGCCTGAACGAG	CTCGTTCAGGCTAGTATTCCGGTCC
14	C5	1277	ATAGTCTAGTTTGGCCTGTGCCAGG	ATAGTCTAGTTTGGCCTGTGCCAGG
14	C6	1278	TTATGAGGGAAGCTGCCAGGATCCC	GGGATCCTGGCAGCTTCCCTCATAA
14	C7	1279	GTGTGGGCTTCCGGGGTCATATATC	GTGTGGGCTTCCGGGGTCATATATC
14	C8	1280	GAATAGGAGCGGGCCTAACCTATCC	GGATAGGTTAGGCCCGCTCCTATTC
14	C9	1281	TCTTTTGGATAGCATGCTGCCCCGT	TCTTTTGGATAGCATGCTGCCCCGT
14	C10	1282	GGAACCACTAGTGGCCCGCTACTAT	ATAGTAGCGGGCCACTAGTGGTTCC
14	C11	1283	GAATTGGTGGTCCGTCATCTGGCCT	GAATTGGTGGTCCGTCATCTGGCCT
14	C12	1284	GATCTAGGACAAAGCTCCCCGCTCC	GGAGCGGGGAGCTTTGTCCTAGATC
14	D1	1285	TTTCGGGTATAGCCCTATGGTCCCA	TTTCGGGTATAGCCCTATGGTCCCA
14	D2	1286	TACACCCTCTAGGCGAGTGACTCGG	CCGAGTCACTCGCCTAGAGGGTGTA
14	D3	1287	CTAGCCAGTCTTTCACAGTTCCAGC	CTAGCCAGTCTTTCACAGTTCCAGC
14	D4	1288	ATACTGATCTGGGACCGGAGCACAA	TTGTGCTCCGGTCCCAGATCAGTAT
14	D5	1289	GGTTGTATCTCGACAGGGGACCCTC	GGTTGTATCTCGACAGGGGACCCTC
14	D6	1290	TCCAGTGGACTAATGGAACACCACC	GGTGGTGTTCCATTAGTCCACTGGA
14	D7	1291	GCTAGTCTTGGTGCCTTTATGCCTA	GCTAGTCTTGGTGCCTTTATGCCTA
14	D8	1292	TGAAACAAACAGGGGCAACAGAGAT	ATCTCTGTTGCCCCTGTTTGTTTCA
14	D9	1293	ATGTGGAGAGACCCCTCCTTTTGCT	ATGTGGAGAGACCCCTCCTTTTGCT
14	D10	1294	CTCTAGCCCCTTAGGGGACCCATAC	GTATGGGTCCCCTAAGGGGCTAGAG
14	D11	1295	AGTCTGGTCACGCAGTTCATGCCTG	AGTCTGGTCACGCAGTTCATGCCTG
14	D12	1296	TAGCGAGAGCTCCACAAGAGAGTCC	GGACTCTCTTGTGGAGCTCTCGCTA
14	E1	1297	GATGCGGCCCTTCTCGATCCATACC	GATGCGGCCCTTCTCGATCCATACC
14	E2	1298	TATGGGCCCTCTACAGCCACTAGAA	TTCTAGTGGCTGTAGAGGGCCCATA
14	E3	1299	TGTCTCACGCTCCTCGCTTTGTCAT	TGTCTCACGCTCCTCGCTTTGTCAT
14	E4	1300	ATCTATCCAGAGAGGAGGACGCTCC	GGAGCGTCCTCCTCTCTGGATAGAT
14	E5	1301	GGTTGTCGGAAGTCCTCCCTTTGTT	GGTTGTCGGAAGTCCTCCCTTTGTT
14	E6	1302	TTAGAAGAGGGGCTTGAGCACTCCC	GGGAGTGCTCAAGCCCCTCTTCTAA
14	E7	1303	AGTCGTCCTGGGTCATAGTAGCGGA	AGTCGTCCTGGGTCATAGTAGCGGA
14	E8	1304	AGAAAGGTGGGACCATGTCCGACTG	CAGTCGGACATGGTCCCACCTTTCT
14	E9	1305	TCATTCGTCAAGCGCCTCTCCTCTC	TCATTCGTCAAGCGCCTCTCCTCTC
14	E10	1306	ACTATGCTACACCAGGGACGTAGAC	GTCTACGTCCCTGGTGTAGCATAGT
14	E11	1307	GTAGTCTCGGCCTTTTGTTCGGTCG	GTAGTCTCGGCCTTTTGTTCGGTCG
14	E12	1308	TGAACCTAACATGGCCTGGACACAA	TTGTGTCCAGGCCATGTTAGGTTCA
14	F1	1309	GTTTCTAGTGGCTGCAGTATCCAGT	GTTTCTAGTGGCTGCAGTATCCAGT
14	F2	1310	AAGAGTTAGGTGGCGGGATGGAGAG	CTCTCCATCCCGCCACCTAACTCTT
14	F3	1311	GTGGTCGCCTACCGTACTTCTGAGT	GTGGTCGCCTACCGTACTTCTGAGT
14	F4	1312	CCAGCACATACGACGGAGAGAAGCG	CGCTTCTCTCCGTCGTATGTGCTGG
14	F5	1313	CCGTGTACGCTTTCCATCCAGTTCC	CCGTGTACGCTTTCCATCCAGTTCC
14	F6	1314	TGAAATGCACCCGAGTGGCAAACAC	GTGTTTGCCACTCGGGTGCATTTCA
14	F7	1315	ATCAGTTGAGTGGGTCTCTGGTCCG	ATCAGTTGAGTGGGTCTCTGGTCCG
14	F8	1316	AAGGGACATCCTGGCCCCTGTATAG	CTATACAGGGGCCAGGATGTCCCTT
14	F9	1317	GCATTTAGCCCACGGTGTGCTCTTG	GCATTTAGCCCACGGTGTGCTCTTG
14	F10	1318	ATCAGCATGAGAGCACGGGTGTACC	GGTACACCCGTGCTCTCATGCTGAT
14	F11	1319	TGAGGGTACCCTGCCCATACGTGTT	TGAGGGTACCCTGCCCATACGTGTT
14	F12	1320	AACACTAATGACGCACGCACAAGGC	GCCTTGTGCGTGCGTCATTAGTGTT
14	G1	1321	CACACTGCCTATCCTACGCAGTCCT	CACACTGCCTATCCTACGCAGTCCT
14	G2	1322	GGCAGGATAGGTGAAATACAACCCC	GGGGTTGTATTTCACCTATCCTGCC
14	G3	1323	TGTTTGTCCGACTCCGCTCCTACTC	TGTTTGTCCGACTCCGCTCCTACTC
14	G4	1324	ATGACAAAAGCACGACGCCCAGACT	AGTCTGGGCGTCGTGCTTTTGTCAT
14	G5	1325	GTCTCCTCTTTCATCGTCAGAGCTT	GTCTCCTCTTTCATCGTCAGAGCTT
14	G6	1326	GGAGATAGCCAAACCAATCCCCAGG	CCTGGGGATTGGTTTGGCTATCTCC
14	G7	1327	GGCCTAGAAGGGATCAGTCCTTCCA	GGCCTAGAAGGGATCAGTCCTTCCA
14	G8	1328	TGGACATGAAAGGGAACAAACCCTC	GAGGGTTTGTTCCCTTTCATGTCCA
14	G9	1329	TGATGGACCTCCCTAGTTTCCTGGT	TGATGGACCTCCCTAGTTTCCTGGT
14	G10	1330	TCTGTAACTGGAGGGCCTGAAGTGA	TCACTTCAGGCCCTCCAGTTACAGA
14	G11	1331	CTACCCGTAGGGTCGTCTCTTTTGC	CTACCCGTAGGGTCGTCTCTTTTGC
14	G12	1332	AGGGGATGGACACCTAAGTATGGTG	CACCATACTTAGGTGTCCATCCCCT
14	H1	1333	TTCTACACGGCCGTCCTTCCCTTAC	TTCTACACGGCCGTCCTTCCCTTAC
14	H2	1334	GAGTGCAAGCGCCTAAGACCTGCAT	ATGCAGGTCTTAGGCGCTTGCACTC
14	H3	1335	GCGTATAAGGTCACAGCCCTCCTGT	GCGTATAAGGTCACAGCCCTCCTGT
14	H4	1336	CTGTGGCCAAGGACCAATGGAAACT	AGTTTCCATTGGTCCTTGGCCACAG
14	H5	1337	GTCAGTTGGAGCAGACCCTCACTTC	GTCAGTTGGAGCAGACCCTCACTTC
14	H6	1338	TGAAGAACCGCTACAGCCCCAAACG	CGTTTGGGGCTGTAGCGGTTCTTCA
14	H7	1339	CCGTGCAGGTAACCCTTATGCCTCT	CCGTGCAGGTAACCCTTATGCCTCT
14	H8	1340	AATTGGGAAGTGGGACATAGGACGC	GCGTCCTATGTCCCACTTCCCAATT
14	H9	1341	TGCTGTCCACCCGCAGGATACTCTA	TGCTGTCCACCCGCAGGATACTCTA
14	H10	1342	CAACAAAGGCGGAGCGTAGCTGACT	AGTCAGCTACGCTCCGCCTTTGTTG
14	H11	1343	ATCCAGTCCCGCGATGTGTTCTTGT	ATCCAGTCCCGCGATGTGTTCTTGT
14	H12	1344	GGGACTTAGCCAGTGGCCTATACAC	GTGTATAGGCCACTGGCTAAGTCCC
15	A1	1345	GCTCTGGAGCCCGTCAACTGTTCAT	GCTCTGGAGCCCGTCAACTGTTCAT
15	A2	1346	TCCTAGGAACGAGTCCTGGCTAGAC	GTCTAGCCAGGACTCGTTCCTAGGA
15	A3	1347	CTTTGGTGGTGCTTGATCTGTGGGC	CTTTGGTGGTGCTTGATCTGTGGGC
15	A4	1348	TAAACTAGGCACGCCATGTCGGGAC	GTCCCGACATGGCGTGCCTAGTTTA
15	A5	1349	TTGCTGCTGGCTCTGCATAGTCTGA	TTGCTGCTGGCTCTGCATAGTCTGA
15	A6	1350	GAAAAGTGCACAGTGCCCAGAAAGC	GCTTTCTGGGCACTGTGCACTTTTC
15	A7	1351	TGCATACAGCCTTCCGTGTGTCCAG	TGCATACAGCCTTCCGTGTGTCCAG
15	A8	1352	TAGCTAACGGGACCTAGTGCAGCAA	TTGCTGCACTAGGTCCCGTTAGCTA
15	A9	1353	GTCGCTGATCGCTCCGGTTCTACTC	GTCGCTGATCGCTCCGGTTCTACTC
15	A10	1354	GATGACAGGGTTGGGGCAGCTATAG	CTATAGCTGCCCCAACCCTGTCATC
15	A11	1355	GGAGTATGGCGTCCCTTGCATAGCA	GGAGTATGGCGTCCCTTGCATAGCA
15	A12	1356	ATACCAACAACCTGCCCACAGACTG	CAGTCTGTGGGCAGGTTGTTGGTAT
15	B1	1357	TCTTTTGGTTGACCCCTGTTGTCGC	TCTTTTGGTTGACCCCTGTTGTCGC
15	B2	1358	TGGTCGGGCTAGAGGAGGCTAAAAT	ATTTTAGCCTCCTCTAGCCCGACCA
15	B3	1359	GCCAGCTAATGCTCCGTTTCGTCCA	GCCAGCTAATGCTCCGTTTCGTCCA
15	B4	1360	AGCCCTGGGACCCCTCTATGATCTA	TAGATCATAGAGGGGTCCCAGGGCT
15	B5	1361	TAGTGAGGGAGGGCCTACTTCTGCT	TAGTGAGGGAGGGCCTACTTCTGCT
15	B6	1362	TCCGGAAAGACTCACAGGGTGGAAT	ATTCCACCCTGTGAGTCTTTCCGGA
15	B7	1363	ACTTAGGTCGTGTGCCGTTCCGAGT	ACTTAGGTCGTGTGCCGTTCCGAGT
15	B8	1364	CGCAAAGTACCTAGCCTACCCGGAC	GTCCGGGTAGGCTAGGTACTTTGCG
15	B9	1365	AGGCAGCTAGCGATTCTCGGGTTCT	AGGCAGCTAGCGATTCTCGGGTTCT
15	B10	1366	ACCCGACCGAGAGTGTAGGACACAT	ATGTGTCCTACACTCTCGGTCGGGT
15	B11	1367	GGGTTTCCGTCGCGTTTAGCCAGAT	GGGTTTCCGTCGCGTTTAGCCAGAT
15	B12	1368	TAAGCTGCCGGCCAGCTATAGTACC	GGTACTATAGCTGGCCGGCAGCTTA
15	C1	1369	GTGAGGACAGTCCGTAGGTGTCTCA	GTGAGGACAGTCCGTAGGTGTCTCA
15	C2	1370	GCGGGGCCTACTAGTAACTCTCTCC	GGAGAGAGTTACTAGTAGGCCCCGC
15	C3	1371	CCTCTCTAAGGGCCGGTCTACTCAC	CCTCTCTAAGGGCCGGTCTACTCAC
15	C4	1372	TGAACGGAAGACTCCTTAGCCCAGC	GCTGGGCTAAGGAGTCTTCCGTTCA
15	C5	1373	ACACAGGGCCCTCCCCATCTATTTA	ACACAGGGCCCTCCCCATCTATTTA
15	C6	1374	TGGAAGCCAAGCGCGAACCTAGAAA	TTTCTAGGTTCGCGCTTGGCTTCCA
15	C7	1375	TGTCATTCCATCGCCCTTTGCTCTG	TGTCATTCCATCGCCCTTTGCTCTG
15	C8	1376	GCAAGCACTGACTCACCGAACACTG	CAGTGTTCGGTGAGTCAGTGCTTGC
15	C9	1377	GAACTCCTGGTGGCGTTGTTTCCTC	GAACTCCTGGTGGCGTTGTTTCCTC
15	C10	1378	CCCATGGTGCAAAGTCACAGGGACT	AGTCCCTGTGACTTTGCACCATGGG
15	C11	1379	CTTCCTATATCTGGCCCGAGGGCTA	CTTCCTATATCTGGCCCGAGGGCTA
15	C12	1380	GGAACAGAGACCATACAGCTCGCGA	TCGCGAGCTGTATGGTCTCTGTTCC
15	D1	1381	GGATATTGCCTGGTGGGTTCGTGTC	GGATATTGCCTGGTGGGTTCGTGTC
15	D2	1382	TCTACCAAAATGAGGAGCGCCACGC	GCGTGGCGCTCCTCATTTTGGTAGA
15	D3	1383	GAGTGAGGTCCCGGGTTAGTACCTG	GAGTGAGGTCCCGGGTTAGTACCTG
15	D4	1384	GCTCTAACCAGGAGGCTCCGTCAAC	GTTGACGGAGCCTCCTGGTTAGAGC
15	D5	1385	GTTTCCTTATACCGGGGTCGCCTGA	GTTTCCTTATACCGGGGTCGCCTGA
15	D6	1386	AGACATGACGAGAAGCCCCGAGTAG	CTACTCGGGGCTTCTCGTCATGTCT
15	D7	1387	GGGTTAAGGTGTTCTCCGTGCTACC	GGGTTAAGGTGTTCTCCGTGCTACC
15	D8	1388	ACGCCAGCTGGACATACCAAAACAG	CTGTTTTGGTATGTCCAGCTGGCGT
15	D9	1389	TGGACATCCCTTCCGGGTAGTTAGC	TGGACATCCCTTCCGGGTAGTTAGC
15	D10	1390	GAACGACCGACCTGTCCCTGGATAC	GTATCCAGGGACAGGTCGGTCGTTC
15	D11	1391	TCCGTCGGCCAGCCTTTTAGCTTTA	TCCGTCGGCCAGCCTTTTAGCTTTA
15	D12	1392	CACCATAAGGGCAGAGGCTCACATG	CATGTGAGCCTCTGCCCTTATGGTG
15	E1	1393	TTCTCCGTAAGCAGCCTATTGCCCT	TTCTCCGTAAGCAGCCTATTGCCCT
15	E2	1394	TGGGCACCGCCACCATACTAAAAGA	TCTTTTAGTATGGTGGCGGTGCCCA
15	E3	1395	GTGTATAGACCTCCCCACGAGGGTT	GTGTATAGACCTCCCCACGAGGGTT
15	E4	1396	GCAAAGGGACTTGGGCTAGATCCTG	CAGGATCTAGCCCAAGTCCCTTTGC
15	E5	1397	AGGTGTGCTGTCACATAGGCCTGTA	AGGTGTGCTGTCACATAGGCCTGTA
15	E6	1398	TCCCTGGAGGCGTGATAGGCAATAC	GTATTGCCTATCACGCCTCCAGGGA
15	E7	1399	GTATATCTCCCTAGGGGCGGCGGAT	GTATATCTCCCTAGGGGCGGCGGAT
15	E8	1400	GTAGTGCGAACAGCACCGGAAGGAT	ATCCTTCCGGTGCTGTTCGCACTAC
15	E9	1401	CTCCTACCGGTGTTCAGGTCACGTG	CTCCTACCGGTGTTCAGGTCACGTG
15	E10	1402	GGTACGGGAGCATGACCTACATCAC	GTGATGTAGGTCATGCTCCCGTACC
15	E11	1403	GGCGAGAGTCACTCCTGGTGAGAGT	GGCGAGAGTCACTCCTGGTGAGAGT
15	E12	1404	TGGAGTCTCTAACGACTGGCCTGGA	TCCAGGCCAGTCGTTAGAGACTCCA
15	F1	1405	GTGTCATTACTCGCCGTTGGCCTTT	GTGTCATTACTCGCCGTTGGCCTTT
15	F2	1406	CATGGCGCTAGGAGACAAGCCCATA	TATGGGCTTGTCTCCTAGCGCCATG
15	F3	1407	TTTAGAGCCCTGGTCCGGCATGTTG	TTTAGAGCCCTGGTCCGGCATGTTG
15	F4	1408	CTCTGCCGACAGAACCAAGGACCAA	TTGGTCCTTGGTTCTGTCGGCAGAG
15	F5	1409	CTTGGTAGTCTAGGCGTCGCGTCTT	CTTGGTAGTCTAGGCGTCGCGTCTT
15	F6	1410	TGAACGTGGACCCGGAAGTCTACAC	GTGTAGACTTCCGGGTCCACGTTCA
15	F7	1411	GCGTAACTCCCTTGGGACTCTTCCT	GCGTAACTCCCTTGGGACTCTTCCT
15	F8	1412	GAGATCCCACACGCCTAGAATGGGA	TCCCATTCTAGGCGTGTGGGATCTC
15	F9	1413	GTGCATCCCTCTAACCTCATTCCGC	GTGCATCCCTCTAACCTCATTCCGC
15	F10	1414	AACGAACGCGGGGAACACCCTAATC	GATTAGGGTGTTCCCCGCGTTCGTT
15	F11	1415	CCCGAGAGTCTTAGGCGCTCATCTC	CCCGAGAGTCTTAGGCGCTCATCTC
15	F12	1416	TAGCAACCTAGCGGGAAACAGAGAT	ATCTCTGTTTCCCGCTAGGTTGCTA
15	G1	1417	CCGAGGGTGTTGAGCCCATCTGTAC	CCGAGGGTGTTGAGCCCATCTGTAC
15	G2	1418	ATAGAGGGATTGGGTGGCCATCACC	GGTGATGGCCACCCAATCCCTCTAT
15	G3	1419	ACTCATCCGCCCTAGTCGTATCAGT	ACTCATCCGCCCTAGTCGTATCAGT
15	G4	1420	AAGGGATCTTGAGCCCTTGGAAGGC	GCCTTCCAAGGGCTCAAGATCCCTT
15	G5	1421	GCGTTTTGGCTACCCCGGTACTAGT	GCGTTTTGGCTACCCCGGTACTAGT
15	G6	1422	AGGGCCTCCTACCTGACTCTTCGAC	GTCGAAGAGTCAGGTAGGAGGCCCT
15	G7	1423	GTAGAGTCGTGTACCCTCCGTGAGG	GTAGAGTCGTGTACCCTCCGTGAGG
15	G8	1424	TCCCCTGTGGGAGTAAGAACCCCAT	ATGGGGTTCTTACTCCCACAGGGGA
15	G9	1425	GGGTGTAGCCTATGAGTGCTGATCC	GGGTGTAGCCTATGAGTGCTGATCC
15	G10	1426	AACCTGAGGGCGATCCTCTACTGCA	TGCAGTAGAGGATCGCCCTCAGGTT
15	G11	1427	ATGTATCGAGTCTTGGGCCGTCCTC	ATGTATCGAGTCTTGGGCCGTCCTC
15	G12	1428	CAATGTAGACAGCTGGGACGCAAGC	GCTTGCGTCCCAGCTGTCTACATTG
15	H1	1429	GCCTGTACAGGATCGCTCTACACCC	GCCTGTACAGGATCGCTCTACACCC
15	H2	1430	CCTACGGGACAGAACAATGCCGACA	TGTCGGCATTGTTCTGTCCCGTAGG
15	H3	1431	TCCTTAAGTAGTCCTCCGCGGGCTA	TCCTTAAGTAGTCCTCCGCGGGCTA
15	H4	1432	AACGAGGAGCATGTAGAAAGCCCCA	TGGGGCTTTCTACATGCTCCTCGTT
15	H5	1433	TAGTTCGACACTGGTGGGTCCCAGT	TAGTTCGACACTGGTGGGTCCCAGT
15	H6	1434	AATGGGCCTACACGACTAAAAGCGC	GCGCTTTTAGTCGTGTAGGCCCATT
15	H7	1435	TAGCTACCCTTCCTCGTGGGTTGAG	TAGCTACCCTTCCTCGTGGGTTGAG
15	H8	1436	TAGCCAGTAGGGGACCATAACGGTG	CACCGTTATGGTCCCCTACTGGCTA
15	H9	1437	CCTGGTTGTATGGCAGATGGGCTCT	CCTGGTTGTATGGCAGATGGGCTCT
15	H10	1438	GGAGACGGTGCCAGATACAATACCC	GGGTATTGTATCTGGCACCGTCTCC
15	H11	1439	GGTTAGGGCGGCTTGCTATGTCATC	GGTTAGGGCGGCTTGCTATGTCATC
15	H12	1440	ATTAGGCGAGCACTACCCAACGGAC	GTCCGTTGGGTAGTGCTCGCCTAAT
16	A1	1441	GGAGGTACCTTTCCCCAGGTTACGA	GGAGGTACCTTTCCCCAGGTTACGA
16	A2	1442	AATGTGATGCAGAGGCACTCCCCAG	CTGGGGAGTGCCTCTGCATCACATT
16	A3	1443	CTTCAGGCCGCCTCTCACTTAGGAT	CTTCAGGCCGCCTCTCACTTAGGAT
16	A4	1444	AGGAGTATGCATACCGAGGGCTCAG	CTGAGCCCTCGGTATGCATACTCCT
16	A5	1445	GTCAGCATGACCTGCGCCTCTTTGA	GTCAGCATGACCTGCGCCTCTTTGA
16	A6	1446	AAAGAAACACGTGGCGGGATGTGGA	TCCACATCCCGCCACGTGTTTCTTT
16	A7	1447	GTGTCGTGTAGGTCCCACATGGTAC	GTGTCGTGTAGGTCCCACATGGTAC
16	A8	1448	CGAAACCCAAGCGCACTGAACCAAC	GTTGGTTCAGTGCGCTTGGGTTTCG
16	A9	1449	CTCGCTCATCCAGAGTCCACGTCTG	CTCGCTCATCCAGAGTCCACGTCTG
16	A10	1450	TCCAGGGACTACAAGCGTACTAGAC	GTCTAGTACGCTTGTAGTCCCTGGA
16	A11	1451	GGTCCAGCCATTACAGGTCGAGTTC	GGTCCAGCCATTACAGGTCGAGTTC
16	A12	1452	ACAGCATAGGCCGCTCCACATAACC	GGTTATGTGGAGCGGCCTATGCTGT
16	B1	1453	GCTCCAGGGTCCAGTCCTACTAACG	GCTCCAGGGTCCAGTCCTACTAACG
16	B2	1454	TCATGAGCACAGCGACCTAGTGCAC	GTGCACTAGGTCGCTGTGCTCATGA
16	B3	1455	TGGTGTCACCCTAATCCCCAGGTAC	TGGTGTCACCCTAATCCCCAGGTAC
16	B4	1456	GTGACTTGCGGCCGTAGGAAGAGAC	GTCTCTTCCTACGGCCGCAAGTCAC
16	B5	1457	GTATGAAGTCATGCCAGCCTTCCCT	GTATGAAGTCATGCCAGCCTTCCCT
16	B6	1458	GAGGAACCGTACGGGGTTAGGACTC	GAGTCCTAACCCCGTACGGTTCCTC
16	B7	1459	TCCTTATGACATCTCCCCTGGGCAG	TCCTTATGACATCTCCCCTGGGCAG
16	B8	1460	ATAAGAGTACACAGGACGCCTAGGG	CCCTAGGCGTCCTGTGTACTCTTAT
16	B9	1461	ATGTCCCACATCAGCCCTTTCTCAT	ATGTCCCACATCAGCCCTTTCTCAT
16	B10	1462	CATACCTACCCCAGTAAGGAGGAGG	CCTCCTCCTTACTGGGGTAGGTATG
16	B11	1463	AGGTAGCGTGATTCCCTTCTTTGCC	AGGTAGCGTGATTCCCTTCTTTGCC
16	B12	1464	AAAACTGCAGAGGCGATGACAGAAC	GTTCTGTCATCGCCTCTGCAGTTTT
16	C1	1465	CGTGTTGGTCGAGCCTTACCAGTCT	CGTGTTGGTCGAGCCTTACCAGTCT
16	C2	1466	ATCTAGGCAGAGGCTCCCAAGAAGT	ACTTCTTGGGAGCCTCTGCCTAGAT
16	C3	1467	GAGAGCTGGAGCCCCGTCGTTATTC	GAGAGCTGGAGCCCCGTCGTTATTC
16	C4	1468	TACCAGGACGATCCAATGGACCTCC	GGAGGTCCATTGGATCGTCCTGGTA
16	C5	1469	ATTTAGGGCCGCCTAAGTGTGCCTC	ATTTAGGGCCGCCTAAGTGTGCCTC
16	C6	1470	GACTGCCAGAGTAACCGCTGCCTAA	TTAGGCAGCGGTTACTCTGGCAGTC
16	C7	1471	GTGAGCTTCAGGTGCGTCTCGATGT	GTGAGCTTCAGGTGCGTCTCGATGT
16	C8	1472	AGTGGCTGGTGATAGCCTGATACGC	GCGTATCAGGCTATCACCAGCCACT
16	C9	1473	GTTGTAGGCCTACCCTTTGTCACGG	GTTGTAGGCCTACCCTTTGTCACGG
16	C10	1474	GAGGTCATTGAAGGCACCCAGAAGC	GCTTCTGGGTGCCTTCAATGACCTC
16	C11	1475	CCAGAGTCCCTAACTCGCTAGTGCC	CCAGAGTCCCTAACTCGCTAGTGCC
16	C12	1476	GAGGACCAGGTTACTGACAGCCGTG	CACGGCTGTCAGTAACCTGGTCCTC
16	D1	1477	CGCCCGAGGTTGGGTTGTTATCCTT	CGCCCGAGGTTGGGTTGTTATCCTT
16	D2	1478	GAAAATGAGGACAGGCCGATACCCA	TGGGTATCGGCCTGTCCTCATTTTC
16	D3	1479	GGGTAAGTCTTGGTCAGTCCCAGAG	GGGTAAGTCTTGGTCAGTCCCAGAG
16	D4	1480	GACAAACTCAGCGGACAGGCTACTA	TAGTAGCCTGTCCGCTGAGTTTGTC
16	D5	1481	GTGTCTACGTAGGTGAGCCCCACTA	GTGTCTACGTAGGTGAGCCCCACTA
16	D6	1482	TACTGCAAGCATCTGGGCTAAAGGG	CCCTTTAGCCCAGATGCTTGCAGTA
16	D7	1483	GTATGCGTTGTGGTCGGTTCCACGT	GTATGCGTTGTGGTCGGTTCCACGT
16	D8	1484	CCCAACAACAGGCCGTAACACCAAC	GTTGGTGTTACGGCCTGTTGTTGGG
16	D9	1485	GGCTCTGGTGTTTCCTTATTGTTGC	GGCTCTGGTGTTTCCTTATTGTTGC
16	D10	1486	TCTAGTGGATGCCACCCCACGAAAC	GTTTCGTGGGGTGGCATCCACTAGA
16	D11	1487	ATAGGAGTTCCTGGCGCTGCAGGTA	ATAGGAGTTCCTGGCGCTGCAGGTA
16	D12	1488	AGCTGAAAGGTGCACCTGACTTAGC	GCTAAGTCAGGTGCACCTTTCAGCT
16	E1	1489	GGCGTTCACTGCATGTTCCTCTTTC	GGCGTTCACTGCATGTTCCTCTTTC
16	E2	1490	GTTAGGGGCACCTCGGAGATAACGC	GCGTTATCTCCGAGGTGCCCCTAAC
16	E3	1491	TAGTTAGGTCCCTCATGTCTGTGGG	TAGTTAGGTCCCTCATGTCTGTGGG
16	E4	1492	AGCAAAGCCCCTACAGTAGGTGTGG	CCACACCTACTGTAGGGGCTTTGCT
16	E5	1493	GCGTGTTATTTAGCTGGCTTGCCCA	GCGTGTTATTTAGCTGGCTTGCCCA
16	E6	1494	ATGGACCGGCGGATAACCAAGTCAC	GTGACTTGGTTATCCGCCGGTCCAT
16	E7	1495	GACTTATAGTGCCGTCTCTGGTGGC	GACTTATAGTGCCGTCTCTGGTGGC
16	E8	1496	GGATCGCATACCAGGCTGGATCCTC	GAGGATCCAGCCTGGTATGCGATCC
16	E9	1497	GGATTGTGTACATGCCCCAGTGGTT	GGATTGTGTACATGCCCCAGTGGTT
16	E10	1498	GGAGTTCAGGGCCTGAAGACTCACA	TGTGAGTCTTCAGGCCCTGAACTCC
16	E11	1499	GATTGGGTCGTCCTGTCTAGTGGGA	GATTGGGTCGTCCTGTCTAGTGGGA
16	E12	1500	CTAGCAAACTGGCGACCCTCAAGAC	GTCTTGAGGGTCGCCAGTTTGCTAG
16	F1	1501	GGTGCAGTAGGCGCTCATACTGAGC	GGTGCAGTAGGCGCTCATACTGAGC
16	F2	1502	AACGCTGCTGGGAACCCAATACTGT	ACAGTATTGGGTTCCCAGCAGCGTT
16	F3	1503	TATGTGTTTTGGCTGCCCCAGTCAG	TATGTGTTTTGGCTGCCCCAGTCAG
16	F4	1504	AGAATAACCACGAGCAAGGCTACGC	GCGTAGCCTTGCTCGTGGTTATTCT
16	F5	1505	GTTTCCGTGTTCTGTTTAGCCGCTT	GTTTCCGTGTTCTGTTTAGCCGCTT
16	F6	1506	AAACAGAAGGAATGAGGCAACACAC	GTGTGTTGCCTCATTCCTTCTGTTT
16	F7	1507	GCCTAGCGCAGACCCAGTTCCTAAG	GCCTAGCGCAGACCCAGTTCCTAAG
16	F8	1508	TGGTATAACAGGGGCCGACATGAGA	TCTCATGTCGGCCCCTGTTATACCA
16	F9	1509	GCCTTGGTGGGTCATAATCTGCCGT	GCCTTGGTGGGTCATAATCTGCCGT
16	F10	1510	TGAGTGTGGCACACTCCCACTATGC	GCATAGTGGGAGTGTGCCACACTCA
16	F11	1511	CATCTGGCTCGGGGTTCTGATCGTC	CATCTGGCTCGGGGTTCTGATCGTC
16	F12	1512	ACACGTCAAGGACTGATACCAGGCT	AGCCTGGTATCAGTCCTTGACGTGT
16	G1	1513	AGGGTCTAGGCTCGCATTTCCTTCG	AGGGTCTAGGCTCGCATTTCCTTCG
16	G2	1514	AACGGGACACGGATATACGGCCTCA	TGAGGCCGTATATCCGTGTCCCGTT
16	G3	1515	CCTTCCGCACGCTGTACTCTATCCT	CCTTCCGCACGCTGTACTCTATCCT
16	G4	1516	GCAGTGGCCTGGAGAGTACTGATCA	TGATCAGTACTCTCCAGGCCACTGC
16	G5	1517	GCGCTCATAGAGTGGTGGGCCTATT	GCGCTCATAGAGTGGTGGGCCTATT
16	G6	1518	TATGCGAACGGAACCTACACCACGC	GCGTGGTGTAGGTTCCGTTCGCATA
16	G7	1519	CTTGGAGGCAGTCAGCCTATCGCTG	CTTGGAGGCAGTCAGCCTATCGCTG
16	G8	1520	ACCACGGCATGGGATACCACATAAC	GTTATGTGGTATCCCATGCCGTGGT
16	G9	1521	GCGGGGCTCGCCTATTTCTTATGTC	GCGGGGCTCGCCTATTTCTTATGTC
16	G10	1522	AACGCTGGCCACTGACAGGCATAAT	ATTATGCCTGTCAGTGGCCAGCGTT
16	G11	1523	CTCTCCGTCAGCCTTATACGGGAGC	CTCTCCGTCAGCCTTATACGGGAGC
16	G12	1524	GACCCAGGCTTAGGTAGTGACCTCC	GGAGGTCACTACCTAAGCCTGGGTC
16	H1	1525	GCTAGACTTTCTGCCGGCGTCATGT	GCTAGACTTTCTGCCGGCGTCATGT
16	H2	1526	ACAGCTAGGCAGCCCTCTAGACTTG	CAAGTCTAGAGGGCTGCCTAGCTGT
16	H3	1527	TCCGATCCCGCTTTAGGGGTGTTTC	TCCGATCCCGCTTTAGGGGTGTTTC
16	H4	1528	AGATCGCCCTAGCCTACTGCCTGAA	TTCAGGCAGTAGGCTAGGGCGATCT
16	H5	1529	CTGCACAGTAGACCTGCCCTATCGC	CTGCACAGTAGACCTGCCCTATCGC
16	H6	1530	GCCAAGACGGACCACCCGGATAATA	TATTATCCGGGTGGTCCGTCTTGGC
16	H7	1531	GTTCCTAGAGAGCACACCGTAGGCC	GTTCCTAGAGAGCACACCGTAGGCC
16	H8	1532	GGGCACAGGCACAAACCTGTCTATC	GATAGACAGGTTTGTGCCTGTGCCC
16	H9	1533	TTCATCACCCGGAGTCGTCTCTGTC	TTCATCACCCGGAGTCGTCTCTGTC
16	H10	1534	AGACTGAGCGAACAGTATCACCGGC	GCCGGTGATACTGTTCGCTCAGTCT
16	H11	1535	AGGTTCCGAGTGTCGTCGTTGGCTA	AGGTTCCGAGTGTCGTCGTTGGCTA
16	H12	1536	AGGGATCCCGCCTGACCTAAAAGTC	GACTTTTAGGTCAGGCGGGATCCCT
17	A1	1537	ACCAGCTGGCCTGTTCCTTAAGTGG	ACCAGCTGGCCTGTTCCTTAAGTGG
17	A2	1538	CTATGGCTGTAGGGGATACCCGCTC	GAGCGGGTATCCCCTACAGCCATAG
17	A3	1539	CGTGTGTACCTCCTACCTCCTCACG	CGTGTGTACCTCCTACCTCCTCACG
17	A4	1540	TCTAGGGCTGAGTCTACCTGTGAGC	GCTCACAGGTAGACTCAGCCCTAGA
17	A5	1541	GTTGCCAGTTCACTGTTCGGTTTCT	GTTGCCAGTTCACTGTTCGGTTTCT
17	A6	1542	TGTAACTCCTAGAGGGACCTACTGC	GCAGTAGGTCCCTCTAGGAGTTACA
17	A7	1543	CTGTGTTTCAGTTGGCGGTCGAGCT	CTGTGTTTCAGTTGGCGGTCGAGCT
17	A8	1544	TGAGAGAGGAATAGAGACACTACAC	GTGTAGTGTCTCTATTCCTCTCTCA
17	A9	1545	GCCTCTGCATGGTTGCCTGATCATG	GCCTCTGCATGGTTGCCTGATCATG
17	A10	1546	ACTCGACCGAGGGCTACCTAACTCG	CGAGTTAGGTAGCCCTCGGTCGAGT
17	A11	1547	GCCACTCGGTCTCTTCTGCGGATAC	GCCACTCGGTCTCTTCTGCGGATAC
17	A12	1548	GGAGGGACGTAGGTGAGGGTATTCC	GGAATACCCTCACCTACGTCCCTCC
17	B1	1549	GCTGGTAGTCCCATCTTACGGAGTC	GCTGGTAGTCCCATCTTACGGAGTC
17	B2	1550	CATGGTACAGGGAACCGACAACCCA	TGGGTTGTCGGTTCCCTGTACCATG
17	B3	1551	TGGGTGGAGTTCCTCGCCTTTTACT	TGGGTGGAGTTCCTCGCCTTTTACT
17	B4	1552	TGAGCGTAATCGGAAGGAGGAACGC	GCGTTCCTCCTTCCGATTACGCTCA
17	B5	1553	GGTATTCCTTTACCGCCCATGGTGG	GGTATTCCTTTACCGCCCATGGTGG
17	B6	1554	TAAATGGGCTAGCAGAAATGGACCC	GGGTCCATTTCTGCTAGCCCATTTA
17	B7	1555	GTGTAGAGGTTCCCTGGCACTGACA	GTGTAGAGGTTCCCTGGCACTGACA
17	B8	1556	AGTTGGAAGCTCACCCTGAGGATGC	GCATCCTCAGGGTGAGCTTCCAACT
17	B9	1557	TCCAATTTCTAGTGCCTCCCACGGC	TCCAATTTCTAGTGCCTCCCACGGC
17	B10	1558	GCCCACAGGGCGACAAAATAAAGGT	ACCTTTATTTTGTCGCCCTGTGGGC
17	B11	1559	GAGGGAGGCTTGTTAGCTCACTGCA	GAGGGAGGCTTGTTAGCTCACTGCA
17	B12	1560	GGAGTCTGACACCCGCTAAGATAGC	GCTATCTTAGCGGGTGTCAGACTCC
17	C1	1561	TGTAGTATCTCGCCGGCCTTCCTTA	TGTAGTATCTCGCCGGCCTTCCTTA
17	C2	1562	GCACACAACTCCTGGAATGGGATGA	TCATCCCATTCCAGGAGTTGTGTGC
17	C3	1563	GTATTAGGGTGCTAGGCGGTGAGGT	GTATTAGGGTGCTAGGCGGTGAGGT
17	C4	1564	GGCAGGACTCAATAGACCTCTACGC	GCGTAGAGGTCTATTGAGTCCTGCC
17	C5	1565	GTTCCATCAGCTGCCCGTGAGGTAA	GTTCCATCAGCTGCCCGTGAGGTAA
17	C6	1566	TAGCCTCAAGGAAGGGCAGATCCTA	TAGGATCTGCCCTTCCTTGAGGCTA
17	C7	1567	ATTTCCTATGGTGTGGGTCTGCCTT	ATTTCCTATGGTGTGGGTCTGCCTT
17	C8	1568	AGGGAGAATGGGTGACTTCCAACCT	AGGTTGGAAGTCACCCATTCTCCCT
17	C9	1569	GGGTGGGTCACTCGGTACGTTTCTT	GGGTGGGTCACTCGGTACGTTTCTT
17	C10	1570	GAATAGGGCGCTCAGCTAGTGAACC	GGTTCACTAGCTGAGCGCCCTATTC
17	C11	1571	GTAGGGACGCTGGTTACAGTCTCCT	GTAGGGACGCTGGTTACAGTCTCCT
17	C12	1572	TGTGACCTGGGATCCTGGACCAAAT	ATTTGGTCCAGGATCCCAGGTCACA
17	D1	1573	GGTCTGAGGCTGTACTGTTTTCCTC	GGTCTGAGGCTGTACTGTTTTCCTC
17	D2	1574	GACCAGTGCCCCTTGAACTGAGAGA	TCTCTCAGTTCAAGGGGCACTGGTC
17	D3	1575	AGGTTCTCATGCCCGCCTTGTTTAG	AGGTTCTCATGCCCGCCTTGTTTAG
17	D4	1576	AGAGCAGGTCGCCCTACTATACCCT	AGGGTATAGTAGGGCGACCTGCTCT
17	D5	1577	GAGATGTTAGCTAGCCCTCTGCGGG	GAGATGTTAGCTAGCCCTCTGCGGG
17	D6	1578	AAAAGGGTAAGAGGGCTCTGCCTAA	TTAGGCAGAGCCCTCTTACCCTTTT
17	D7	1579	CCGCTAGGCATCAGTTTAGCGGTGT	CCGCTAGGCATCAGTTTAGCGGTGT
17	D8	1580	GGGGAACCGTGGCTGGGTATGTAAT	ATTACATACCCAGCCACGGTTCCCC
17	D9	1581	GGCTTCACTTCCTGTTACCCAGGAG	GGCTTCACTTCCTGTTACCCAGGAG
17	D10	1582	TACAGACCAAGCCAACACATAGGGA	TCCCTATGTGTTGGCTTGGTCTGTA
17	D11	1583	ACGTTACGTTGTACTGCCCCAGTCC	ACGTTACGTTGTACTGCCCCAGTCC
17	D12	1584	CACTGAGATAAGCTGGGCACCGGTA	TACCGGTGCCCAGCTTATCTCAGTG
17	E1	1585	GGTCCCTATGGTGGTCGATGGGATC	GGTCCCTATGGTGGTCGATGGGATC
17	E2	1586	AGACTCGGCTGGGAGCCATAAACAT	ATGTTTATGGCTCCCAGCCGAGTCT
17	E3	1587	GCCATTTAGTAGTGCCCGTCGTGTA	GCCATTTAGTAGTGCCCGTCGTGTA
17	E4	1588	AGCAAAAGGGGAACCCGTCAACTGT	ACAGTTGACGGGTTCCCCTTTTGCT
17	E5	1589	ACCATAAGGGGTCTCCCTCAGTAGT	ACCATAAGGGGTCTCCCTCAGTAGT
17	E6	1590	TAGCGTCACCAGAGACCGGCTACTC	GAGTAGCCGGTCTCTGGTGACGCTA
17	E7	1591	AGTGTCGCTTGCTTTCACGGTCCAG	AGTGTCGCTTGCTTTCACGGTCCAG
17	E8	1592	AGGTCGCAACACCTAAGCACTGAAC	GTTCAGTGCTTAGGTGTTGCGACCT
17	E9	1593	GAGTCGAGTCTTCGGCCAGTGAGTT	GAGTCGAGTCTTCGGCCAGTGAGTT
17	E10	1594	CCTACCTGAGGGCCGCAGAAATCTC	GAGATTTCTGCGGCCCTCAGGTAGG
17	E11	1595	TACTTCGGGTACTGCCTTCGTCCTC	TACTTCGGGTACTGCCTTCGTCCTC
17	E12	1596	GGCCCCGGTCACCCATACTATAAGC	GCTTATAGTATGGGTGACCGGGGCC
17	F1	1597	TGTTTTACGGGGTCAGCCGTGTCTC	TGTTTTACGGGGTCAGCCGTGTCTC
17	F2	1598	GCAGGGTACCACCTAGGATCGACTA	TAGTCGATCCTAGGTGGTACCCTGC
17	F3	1599	GGGTCAGTTCACGCTCTCATGTCTA	GGGTCAGTTCACGCTCTCATGTCTA
17	F4	1600	GACCAGGACATGTACACGGCTCACA	TGTGAGCCGTGTACATGTCCTGGTC
17	F5	1601	GTCCCTCACACAGGCCACATTCATC	GTCCCTCACACAGGCCACATTCATC
17	F6	1602	AGGGCGACGCATCAGGGTAAGAATG	CATTCTTACCCTGATGCGTCGCCCT
17	F7	1603	GGGGAGCATAGCTTCTGGTATCGGC	GGGGAGCATAGCTTCTGGTATCGGC
17	F8	1604	GTGATGAAAGCGTGCAGGCACAGAC	GTCTGTGCCTGCACGCTTTCATCAC
17	F9	1605	GCTTCTACCTGACGTAGGCTGTGCA	GCTTCTACCTGACGTAGGCTGTGCA
17	F10	1606	GAATACGGATACCCCAACTCGGCCC	GGGCCGAGTTGGGGTATCCGTATTC
17	F11	1607	CGTAGCCCTTCCCCAGTTAGAGATC	CGTAGCCCTTCCCCAGTTAGAGATC
17	F12	1608	GGGGTGACCCTACCCAGTGAATCAT	ATGATTCACTGGGTAGGGTCACCCC
17	G1	1609	TTGTGGGCTACCAGTGCGTCTTGTT	TTGTGGGCTACCAGTGCGTCTTGTT
17	G2	1610	TACAAGGGACTAGCGCGTGAACTCC	GGAGTTCACGCGCTAGTCCCTTGTA
17	G3	1611	GGGTCACTGTTTCGGTCGCGTCTAG	GGGTCACTGTTTCGGTCGCGTCTAG
17	G4	1612	AGCCGGACAGATCCATAAGAAGCAC	GTGCTTCTTATGGATCTGTCCGGCT
17	G5	1613	ATGCTTCTGTGCCTTTTCCGCAGGA	ATGCTTCTGTGCCTTTTCCGCAGGA
17	G6	1614	ACCCATAGCGGAAAACCAAAACGGC	GCCGTTTTGGTTTTCCGCTATGGGT
17	G7	1615	TAGTACTGGCCTGCTCTAGAGCGTC	TAGTACTGGCCTGCTCTAGAGCGTC
17	G8	1616	CAAACCAGACCGAGGGACCTCCATA	TATGGAGGTCCCTCGGTCTGGTTTG
17	G9	1617	TCTCACTAGTTTGGGACTGTCCCCA	TCTCACTAGTTTGGGACTGTCCCCA
17	G10	1618	GCGATGATGAGACCGTGGCCTACAG	CTGTAGGCCACGGTCTCATCATCGC
17	G11	1619	AGCAGGGGTCACTAGGGCTGTTATC	AGCAGGGGTCACTAGGGCTGTTATC
17	G12	1620	GAGTAATAGGCTAGGGGCTCGGTGA	TCACCGAGCCCCTAGCCTATTACTC
17	H1	1621	GATGCCCTTACAGGTCCGTCGGTTA	GATGCCCTTACAGGTCCGTCGGTTA
17	H2	1622	TGGTGCTGAGGGCTTAACCTAACAC	GTGTTAGGTTAAGCCCTCAGCACCA
17	H3	1623	GAGTTGACTGTTGGCCGATCCCCTT	GAGTTGACTGTTGGCCGATCCCCTT
17	H4	1624	TGACCCTAGAACACGCTCTAGGCGA	TCGCCTAGAGCGTGTTCTAGGGTCA
17	H5	1625	CTCCGACCCTGTAGTCATGGTGCAT	CTCCGACCCTGTAGTCATGGTGCAT
17	H6	1626	ACAAAACCGGAGAACGCCTAAGCTC	GAGCTTAGGCGTTCTCCGGTTTTGT
17	H7	1627	GTCGTAGGCGTTTCACATGGGCTCT	GTCGTAGGCGTTTCACATGGGCTCT
17	H8	1628	ATAGGGAAAGCGAATGGAGTCCAGC	GCTGGACTCCATTCGCTTTCCCTAT
17	H9	1629	CTAGGATAGGGTGGTCGTTCCCAGG	CTAGGATAGGGTGGTCGTTCCCAGG
17	H10	1630	GAGATTGGCCCTACAAGAAAGCGCC	GGCGCTTTCTTGTAGGGCCAATCTC
17	H11	1631	TCCGTGTATTCCCATACTCGGCTGC	TCCGTGTATTCCCATACTCGGCTGC
17	H12	1632	GTCACTAGACCACAGCCTTGGAGAC	GTCTCCAAGGCTGTGGTCTAGTGAC
18	A1	1633	GCAGTTAGTGTCTACGAGCGACCCC	GCAGTTAGTGTCTACGAGCGACCCC
18	A2	1634	GAAGCCAGGGTAAGTCTCGCTACCC	GGGTAGCGAGACTTACCCTGGCTTC
18	A3	1635	TCATTAGTCGCAGCCCTCGTATCCT	TCATTAGTCGCAGCCCTCGTATCCT
18	A4	1636	AACCCCGATGAGAGAAGTACCACAC	GTGTGGTACTTCTCTCATCGGGGTT
18	A5	1637	GGCCTTGTGGATTTTGGACTCCCTG	GGCCTTGTGGATTTTGGACTCCCTG
18	A6	1638	CGCTGGTCTAAACATCCCTAGGGGC	GCCCCTAGGGATGTTTAGACCAGCG
18	A7	1639	TCCTCTCATTTAGTTCAGCGTGGGC	TCCTCTCATTTAGTTCAGCGTGGGC
18	A8	1640	GGAGGTTCAGGGCTAGTGCTCTAGG	CCTAGAGCACTAGCCCTGAACCTCC
18	A9	1641	TGGGTCATAGGTCCTTGCCCATACT	TGGGTCATAGGTCCTTGCCCATACT
18	A10	1642	TAAGTGAACGAACAGCGGGCTCGAC	GTCGAGCCCGCTGTTCGTTCACTTA
18	A11	1643	GAAGGCAGCCAGATTCCTAGGGGTC	GAAGGCAGCCAGATTCCTAGGGGTC
18	A12	1644	ACGAAGCCAGGTGACGGATAACTCC	GGAGTTATCCGTCACCTGGCTTCGT
18	B1	1645	TCATATTCTGCTCGTGGCTCCCGTT	TCATATTCTGCTCGTGGCTCCCGTT
18	B2	1646	ACTCTGCTGGGCTCGGAACTAGTCT	AGACTAGTTCCGAGCCCAGCAGAGT
18	B3	1647	GGGCACGAGTGGTCACCTGTTCTAG	GGGCACGAGTGGTCACCTGTTCTAG
18	B4	1648	ACTATAGTACGCGCAGCAGTGGGAC	GTCCCACTGCTGCGCGTACTATAGT
18	B5	1649	GGGGTCAGTATAGGCTCAGGTGTTG	GGGGTCAGTATAGGCTCAGGTGTTG
18	B6	1650	TGGACAAACACGATACCTGCCAAGG	CCTTGGCAGGTATCGTGTTTGTCCA
18	B7	1651	GTACTGTTATCGCCCGCCGTACTCT	GTACTGTTATCGCCCGCCGTACTCT
18	B8	1652	CTGTCCAAGGACCGGAGTCAAGAGC	GCTCTTGACTCCGGTCCTTGGACAG
18	B9	1653	AGGTATGCAGGCACTCTGGTCTCAC	AGGTATGCAGGCACTCTGGTCTCAC
18	B10	1654	ATCCAGAGTGAAGCAGCAAGGCTAC	GTAGCCTTGCTGCTTCACTCTGGAT
18	B11	1655	GTTAGTGGCGTCGGCTCATGCTTTC	GTTAGTGGCGTCGGCTCATGCTTTC
18	B12	1656	ATAGGCAGCTAAACGCTGGGCCAAT	ATTGGCCCAGCGTTTAGCTGCCTAT
18	C1	1657	GTAGTCATGATCCGGGGTCTGAGCT	GTAGTCATGATCCGGGGTCTGAGCT
18	C2	1658	AAAACCGCGAGAGGAAAACCCATGC	GCATGGGTTTTCCTCTCGCGGTTTT
18	C3	1659	GGTTGCATGCTGAGGTATCCAGCGT	GGTTGCATGCTGAGGTATCCAGCGT
18	C4	1660	AAGGCAAGGCAATCCCAAGAGCTCA	TGAGCTCTTGGGATTGCCTTGCCTT
18	C5	1661	GTAGTTGGATCAGCCGGCACCAGTT	GTAGTTGGATCAGCCGGCACCAGTT
18	C6	1662	TAAAATGACGACTGACCGGAGGGAG	CTCCCTCCGGTCAGTCGTCATTTTA
18	C7	1663	GGCAGTGGTCCCAGTATACGAGCAC	GGCAGTGGTCCCAGTATACGAGCAC
18	C8	1664	TCCCAGGTAACTGGATCCAGACGAC	GTCGTCTGGATCCAGTTACCTGGGA
18	C9	1665	GGTGATTATTGACCGGCCCCAGTGT	GGTGATTATTGACCGGCCCCAGTGT
18	C10	1666	ACTTGAGGGTATGAGGCCAAAGCGG	CCGCTTTGGCCTCATACCCTCAAGT
18	C11	1667	GTATAGCTAGGGAGGCAGTCGCCAC	GTATAGCTAGGGAGGCAGTCGCCAC
18	C12	1668	TCTAAGCAGGACCTCCCGTAGAGGA	TCCTCTACGGGAGGTCCTGCTTAGA
18	D1	1669	ACTATTTTCCCTTGTACTCCCGGCC	ACTATTTTCCCTTGTACTCCCGGCC
18	D2	1670	ACACGGAGCCTCGGAAAGACATTGC	GCAATGTCTTTCCGAGGCTCCGTGT
18	D3	1671	CCGTATGTTTCCAAGGGCTTGTCCC	CCGTATGTTTCCAAGGGCTTGTCCC
18	D4	1672	TACAGTAAGACCGCTCACCACGGAC	GTCCGTGGTGAGCGGTCTTACTGTA
18	D5	1673	GATGTGGCCTCCCTGTAGAGCTTAT	GATGTGGCCTCCCTGTAGAGCTTAT
18	D6	1674	CGGCCCACTCTGGGAGAGCTAATAA	TTATTAGCTCTCCCAGAGTGGGCCG
18	D7	1675	AGGGTCTAGGCGTAACTGGTTCCCA	AGGGTCTAGGCGTAACTGGTTCCCA
18	D8	1676	CCACTGAAGGATGCCACTCGGAACT	AGTTCCGAGTGGCATCCTTCAGTGG
18	D9	1677	ATTTGATCGGTGTGCCTTTCCCCTT	ATTTGATCGGTGTGCCTTTCCCCTT
18	D10	1678	GGAGCAGAATGTCACCCCTAACAGG	CCTGTTAGGGGTGACATTCTGCTCC
18	D11	1679	CTATGGTCTAGGGGATGGCGTCCTC	CTATGGTCTAGGGGATGGCGTCCTC
18	D12	1680	AGCACTAAAAGGGAAGAGCCTCCAT	ATGGAGGCTCTTCCCTTTTAGTGCT
18	E1	1681	TTAGGGGTTCTACCGATGTCCCGCT	TTAGGGGTTCTACCGATGTCCCGCT
18	E2	1682	GCTCATGATGACCCGACTACCCAGG	CCTGGGTAGTCGGGTCATCATGAGC
18	E3	1683	AGTCCAGGTGTAGGTAATCCTCGGC	AGTCCAGGTGTAGGTAATCCTCGGC
18	E4	1684	AAAGGCCACGAGAACCCGGATACAT	ATGTATCCGGGTTCTCGTGGCCTTT
18	E5	1685	GGTGTTGTATCCCGTTGGGCTATGG	GGTGTTGTATCCCGTTGGGCTATGG
18	E6	1686	GCGGCCACCCCAGCTATACTAAGAA	TTCTTAGTATAGCTGGGGTGGCCGC
18	E7	1687	AGAGTGTCGCAGTGCCATCCTTCAG	AGAGTGTCGCAGTGCCATCCTTCAG
18	E8	1688	TAAGCCTAAGACAGCGGCACAATGG	CCATTGTGCCGCTGTCTTAGGCTTA
18	E9	1689	GTGTGGCGTAATTGTGCCTCTCGGT	GTGTGGCGTAATTGTGCCTCTCGGT
18	E10	1690	GTACCACGGGAGAGTTGCACCCTAC	GTAGGGTGCAACTCTCCCGTGGTAC
18	E11	1691	CCTAGTAGACTGTGCCCCGGTTTGA	CCTAGTAGACTGTGCCCCGGTTTGA
18	E12	1692	TTATAGGGCGAAACAGGGTGGACGC	GCGTCCACCCTGTTTCGCCCTATAA
18	F1	1693	GTCTAGCTAGTGGTGTCGGCATCAG	GTCTAGCTAGTGGTGTCGGCATCAG
18	F2	1694	GGCAGCTAGTCTAGGGCCTATGCAA	TTGCATAGGCCCTAGACTAGCTGCC
18	F3	1695	GTCATTGGTACTACCTAGCTCGCCC	GTCATTGGTACTACCTAGCTCGCCC
18	F4	1696	GAGACCTCGCCATAGACATAGGACC	GGTCCTATGTCTATGGCGAGGTCTC
18	F5	1697	TCTTTCCATTCCGCCCATCAGTCTA	TCTTTCCATTCCGCCCATCAGTCTA
18	F6	1698	TCAGGCTCTAGCAGGGACAAATCGG	CCGATTTGTCCCTGCTAGAGCCTGA
18	F7	1699	ACTTCCGCCTGTTCTGGTTTCGTTC	ACTTCCGCCTGTTCTGGTTTCGTTC
18	F8	1700	GTAGAACGGTGTCCTGAGAGGGACG	CGTCCCTCTCAGGACACCGTTCTAC
18	F9	1701	TACTGGTGTGTTAGTTCCCCGCGTT	TACTGGTGTGTTAGTTCCCCGCGTT
18	F10	1702	TGAGTTGAGGCTAGGAAGCAACGGA	TCCGTTGCTTCCTAGCCTCAACTCA
18	F11	1703	GTTGCAGTGGCCAGGATCTGCGTAT	GTTGCAGTGGCCAGGATCTGCGTAT
18	F12	1704	GGTAAGGTAGCGGCCTGAGGTGAAA	TTTCACCTCAGGCCGCTACCTTACC
18	G1	1705	TCTAGATGCGTTTTCCCGCCAGTGT	TCTAGATGCGTTTTCCCGCCAGTGT
18	G2	1706	ACTATACGGCCATGAGAGGACGACA	TGTCGTCCTCTCATGGCCGTATAGT
18	G3	1707	GATTTCACGTAGTGGCCCCAGGTGA	GATTTCACGTAGTGGCCCCAGGTGA
18	G4	1708	GAAGAAGGCACGAACCACTCAAGCA	TGCTTGAGTGGTTCGTGCCTTCTTC
18	G5	1709	TTTACCCGTACTCTCCTTCGCAGCT	TTTACCCGTACTCTCCTTCGCAGCT
18	G6	1710	CAGACCAACACGGCCGACTGACTAT	ATAGTCAGTCGGCCGTGTTGGTCTG
18	G7	1711	TGTTGCGGGGTCGTCTAGATGTCCA	TGTTGCGGGGTCGTCTAGATGTCCA
18	G8	1712	GGACTGACCAAGCTAGCGTCTCTGG	CCAGAGACGCTAGCTTGGTCAGTCC
18	G9	1713	CTGGTATTACCTCTCAGGGTGCTCT	CTGGTATTACCTCTCAGGGTGCTCT
18	G10	1714	GCAACAACCTGAGGGCTCTGTACTG	CAGTACAGAGCCCTCAGGTTGTTGC
18	G11	1715	GGTATAGCGGTTTGCTACTCCCCTA	GGTATAGCGGTTTGCTACTCCCCTA
18	G12	1716	TCGAGACAACACGGACTACCAGAAC	GTTCTGGTAGTCCGTGTTGTCTCGA
18	H1	1717	TGTGGGCGTGTCTTTCGCTCATCTT	TGTGGGCGTGTCTTTCGCTCATCTT
18	H2	1718	GGACATCACATTGGGCTACACAGGG	CCCTGTGTAGCCCAATGTGATGTCC
18	H3	1719	ATATCAGGCTGCACCGTTGTGGTCC	ATATCAGGCTGCACCGTTGTGGTCC
18	H4	1720	GAAGAGGACCCCGTGCCACCATAAA	TTTATGGTGGCACGGGGTCCTCTTC
18	H5	1721	GCACGTGCTATTTGCCTTCTCTGTC	GCACGTGCTATTTGCCTTCTCTGTC
18	H6	1722	AAACTCCACGGGAACAACAGACTGA	TCAGTCTGTTGTTCCCGTGGAGTTT
18	H7	1723	GTCACTCGCTGTACCGTTGCGTTCT	GTCACTCGCTGTACCGTTGCGTTCT
18	H8	1724	TCTGGCTAGCACCTAAACCGTGAGC	GCTCACGGTTTAGGTGCTAGCCAGA
18	H9	1725	CTTATGTCACATCGCCCTGTCGCCA	CTTATGTCACATCGCCCTGTCGCCA
18	H10	1726	AACAGGCGGAGCCGATAAGGGTAAT	ATTACCCTTATCGGCTCCGCCTGTT
18	H11	1727	GAAGGTCCTAGTTGGGGCAGAGTGT	GAAGGTCCTAGTTGGGGCAGAGTGT
18	H12	1728	TGACTGTACAAGCGGACCAAACAGC	GCTGTTTGGTCCGCTTGTACAGTCA
19	A1	1729	GCCAGCTTGACCGTTAGTGTTGGGA	GCCAGCTTGACCGTTAGTGTTGGGA
19	A2	1730	AGGGGTCACTTGGCACAGAAACCAA	TTGGTTTCTGTGCCAAGTGACCCCT
19	A3	1731	GTCCCTCTAGTGCCACGACGTCTTA	GTCCCTCTAGTGCCACGACGTCTTA
19	A4	1732	ATAAGGCAGCACGCTCCAGACAACT	AGTTGTCTGGAGCGTGCTGCCTTAT
19	A5	1733	GAGGGTTGACCATTTCCCTGTCCTG	GAGGGTTGACCATTTCCCTGTCCTG
19	A6	1734	GAGTAGGGCATCTGGTCCACCACTG	CAGTGGTGGACCAGATGCCCTACTC
19	A7	1735	TAGGCCCAGTCTATGGCACCGGTAT	TAGGCCCAGTCTATGGCACCGGTAT
19	A8	1736	ACCCCTAAAGGGCAGTATACGAAGC	GCTTCGTATACTGCCCTTTAGGGGT
19	A9	1737	GGGGCCATTTGCATGGAGTCTTACC	GGGGCCATTTGCATGGAGTCTTACC
19	A10	1738	GGTACTAACTAGGGCCAAGCTGTCC	GGACAGCTTGGCCCTAGTTAGTACC
19	A11	1739	GGTAGTTCATCCCCGATTGGTTGGT	GGTAGTTCATCCCCGATTGGTTGGT
19	A12	1740	GCACAGAGCCACATATGGTACGAGC	GCTCGTACCATATGTGGCTCTGTGC
19	B1	1741	GTTTTCCAGTGCGCACTGTCGTTCT	GTTTTCCAGTGCGCACTGTCGTTCT
19	B2	1742	TGAAAGAATGGTACCCTAGGCGGCG	CGCCGCCTAGGGTACCATTCTTTCA
19	B3	1743	GGTTAGACCATCCACCGTGGTGGTT	GGTTAGACCATCCACCGTGGTGGTT
19	B4	1744	GGAAGACCCAACAGACCGTACATCC	GGATGTACGGTCTGTTGGGTCTTCC
19	B5	1745	ACATAGTACAGGCTCATCCCTCCCA	ACATAGTACAGGCTCATCCCTCCCA
19	B6	1746	GAAGAGCGACCCATGGAAACTAGCA	TGCTAGTTTCCATGGGTCGCTCTTC
19	B7	1747	TCCCGGAGAGTGGATTCTGGCCTTA	TCCCGGAGAGTGGATTCTGGCCTTA
19	B8	1748	TTAGGCTGAGCAGAAGCCACTAGCA	TGCTAGTGGCTTCTGCTCAGCCTAA
19	B9	1749	AGTTTGTATTCCCTACCGGCCCATC	AGTTTGTATTCCCTACCGGCCCATC
19	B10	1750	CACCACCTTGGATACAGGCCAGACA	TGTCTGGCCTGTATCCAAGGTGGTG
19	B11	1751	AGCCCTCTCCTGACGTTGTACTCAC	AGCCCTCTCCTGACGTTGTACTCAC
19	B12	1752	ACTGAGAGAGTGACGGCTCACCAAT	ATTGGTGAGCCGTCACTCTCTCAGT
19	C1	1753	TTCCATGTTAGTGGGGCACTGCCAT	TTCCATGTTAGTGGGGCACTGCCAT
19	C2	1754	TAAGGAGTGAACCGCAACAAACCCC	GGGGTTTGTTGCGGTTCACTCCTTA
19	C3	1755	AGGCTTAGGTGGGTAGCCTACAGTT	AGGCTTAGGTGGGTAGCCTACAGTT
19	C4	1756	ATAGAAAGGACACGCCGAGCAACCA	TGGTTGCTCGGCGTGTCCTTTCTAT
19	C5	1757	TTTCTAGTCAGTGTCCCGCATTGCT	TTTCTAGTCAGTGTCCCGCATTGCT
19	C6	1758	TACAGGAACGCACGAGGGTGGAATA	TATTCCACCCTCGTGCGTTCCTGTA
19	C7	1759	GATACATCTCCGCTCCGTGGTCCAG	GATACATCTCCGCTCCGTGGTCCAG
19	C8	1760	CAAGAACTGGCGGAGAAGCCACAAT	ATTGTGGCTTCTCCGCCAGTTCTTG
19	C9	1761	CCAGTGAGACAGGTCGGCTACTCCT	CCAGTGAGACAGGTCGGCTACTCCT
19	C10	1762	GTAACTAGCGGAGTCGGAGCCAAGG	CCTTGGCTCCGACTCCGCTAGTTAC
19	C11	1763	AGATAGGCTCTCCCCAATGCTCCTG	AGATAGGCTCTCCCCAATGCTCCTG
19	C12	1764	GAACAGAGGTCACGAAAACCAGAGC	GCTCTGGTTTTCGTGACCTCTGTTC
19	D1	1765	TGCCTGGGTTTGGCATCCATAGCTA	TGCCTGGGTTTGGCATCCATAGCTA
19	D2	1766	AAGGAAAGCAGCCCTGTCGTACCAC	GTGGTACGACAGGGCTGCTTTCCTT
19	D3	1767	GTCTAACTGGGCCTTCTCGGGCTAG	GTCTAACTGGGCCTTCTCGGGCTAG
19	D4	1768	TCAGGCCGGGCACGAGACATATAAC	GTTATATGTCTCGTGCCCGGCCTGA
19	D5	1769	GCCTATGTAGTCCTGGGGATGGTAC	GCCTATGTAGTCCTGGGGATGGTAC
19	D6	1770	CCTGTGGTGGGGTCTAAGCACACTC	GAGTGTGCTTAGACCCCACCACAGG
19	D7	1771	GGTCATGGCTACGTCTGTCACTCGT	GGTCATGGCTACGTCTGTCACTCGT
19	D8	1772	GACGGCCGATCGGTACTGAACACAC	GTGTGTTCAGTACCGATCGGCCGTC
19	D9	1773	GTATGCTATCCCCTCGTAGTGAGGT	GTATGCTATCCCCTCGTAGTGAGGT
19	D10	1774	CACCACGCCTGGGGCTATGGTATAG	CTATACCATAGCCCCAGGCGTGGTG
19	D11	1775	CGGTTCATCCACCCACCACTCTTTC	CGGTTCATCCACCCACCACTCTTTC
19	D12	1776	CCCTGGAGCTAGAAAGCGATAACCC	GGGTTATCGCTTTCTAGCTCCAGGG
19	E1	1777	CGCCGCTAGTGCATAGGTCCTTTCA	CGCCGCTAGTGCATAGGTCCTTTCA
19	E2	1778	AGGAGATCCTGGGACTATAAGCACT	AGTGCTTATAGTCCCAGGATCTCCT
19	E3	1779	ACACGTTGGCTGCCTCCTGTCTTAG	ACACGTTGGCTGCCTCCTGTCTTAG
19	E4	1780	CTCGGAAATCTGGAGAGGAGGTGGA	TCCACCTCCTCTCCAGATTTCCGAG
19	E5	1781	CCTGTAGTTGCCTCTAGCATCAGTT	CCTGTAGTTGCCTCTAGCATCAGTT
19	E6	1782	GCGACAGGACTAGGCATAGACCAAA	TTTGGTCTATGCCTAGTCCTGTCGC
19	E7	1783	CTGCTCCGTCCCTGTCTCAATGAGG	CTGCTCCGTCCCTGTCTCAATGAGG
19	E8	1784	TAGGCTGCGAGCCTAGTACTAACGC	GCGTTAGTACTAGGCTCGCAGCCTA
19	E9	1785	TCCTTATAGTGTGTGGCGGTCAGCT	TCCTTATAGTGTGTGGCGGTCAGCT
19	E10	1786	TAGCTGAACCAGACGAGCACCGAAA	TTTCGGTGCTCGTCTGGTTCAGCTA
19	E11	1787	AGTCGTGGTATCCCCAGTTATGGCA	AGTCGTGGTATCCCCAGTTATGGCA
19	E12	1788	GAAAGACCGTCCCTAGCGGAGATGG	CCATCTCCGCTAGGGACGGTCTTTC
19	F1	1789	GCATTGGGTATCACCTTGGGAGGCT	GCATTGGGTATCACCTTGGGAGGCT
19	F2	1790	TCTGCGCGGGACCTCTACTATAGCC	GGCTATAGTAGAGGTCCCGCGCAGA
19	F3	1791	ATGAGCTGCTCGACCTGTCTGGCTA	ATGAGCTGCTCGACCTGTCTGGCTA
19	F4	1792	GGAGTCTATGACTACCTAGCCCCAC	GTGGGGCTAGGTAGTCATAGACTCC
19	F5	1793	GTTATCCGGTCCTCACTCGGTGGAT	GTTATCCGGTCCTCACTCGGTGGAT
19	F6	1794	GTGCATCAGGGAATGGCAGTGCAAC	GTTGCACTGCCATTCCCTGATGCAC
19	F7	1795	TCGGTTGCCAGAGCTAGGTATTCCT	TCGGTTGCCAGAGCTAGGTATTCCT
19	F8	1796	AGAGCGGGAACGGAAAGAGTATGGT	ACCATACTCTTTCCGTTCCCGCTCT
19	F9	1797	ATCTGGGGTCCTGTTATCGGTGAGC	ATCTGGGGTCCTGTTATCGGTGAGC
19	F10	1798	TATCGACAAGAGCCAAGAGCGGCTC	GAGCCGCTCTTGGCTCTTGTCGATA
19	F11	1799	ACCTTGGTGTCGATCTGTTGCCCAT	ACCTTGGTGTCGATCTGTTGCCCAT
19	F12	1800	GACTAACCAGTGCGCGGACCAAACA	TGTTTGGTCCGCGCACTGGTTAGTC
19	G1	1801	GTGGAGCGTCTCCTCAAGGGTTCTA	GTGGAGCGTCTCCTCAAGGGTTCTA
19	G2	1802	ACATGCCACCCTACTCTGGCAGATG	CATCTGCCAGAGTAGGGTGGCATGT
19	G3	1803	GTTGGAGCCATCCGTTGTCCTTGAG	GTTGGAGCCATCCGTTGTCCTTGAG
19	G4	1804	TCCACAAAGGGATAGGAATAGAGGC	GCCTCTATTCCTATCCCTTTGTGGA
19	G5	1805	GTCCTTTGCTTATTCCTGCGTGGTG	GTCCTTTGCTTATTCCTGCGTGGTG
19	G6	1806	CGACAGGACGCTATCACAGGAAGAC	GTCTTCCTGTGATAGCGTCCTGTCG
19	G7	1807	CTTCATCCCTTAGCTCAGTCTGCTA	CTTCATCCCTTAGCTCAGTCTGCTA
19	G8	1808	AAAAGCATGGACTCCCCGAGACACA	TGTGTCTCGGGGAGTCCATGCTTTT
19	G9	1809	GCGCCTCTCACCGGTCTACTAGTAG	GCGCCTCTCACCGGTCTACTAGTAG
19	G10	1810	TTCAGACGGGGACTCTCTAAGGAGC	GCTCCTTAGAGAGTCCCCGTCTGAA
19	G11	1811	ATGCGTGGGTATCTTCCTTGGACCC	ATGCGTGGGTATCTTCCTTGGACCC
19	G12	1812	TAATGACGGCGAATGCTGAAGGGCT	AGCCCTTCAGCATTCGCCGTCATTA
19	H1	1813	TTGGCTATTGTGGATCCGCAGCTCC	TTGGCTATTGTGGATCCGCAGCTCC
19	H2	1814	TCACCAGACGGAGGTAGCCTCAAGT	ACTTGAGGCTACCTCCGTCTGGTGA
19	H3	1815	TGTCTCTGCCGGGTCATTAGGTCAT	TGTCTCTGCCGGGTCATTAGGTCAT
19	H4	1816	CACCTGCAGGCTGACACAAAAGCAA	TTGCTTTTGTGTCAGCCTGCAGGTG
19	H5	1817	GTCTTGAGGCTACACGCGGTCTGTC	GTCTTGAGGCTACACGCGGTCTGTC
19	H6	1818	GAGACTCATGAAACCGGGCCTCCAA	TTGGAGGCCCGGTTTCATGAGTCTC
19	H7	1819	GTAGTGAGTCTGCGCTTCATGCCAC	GTAGTGAGTCTGCGCTTCATGCCAC
19	H8	1820	GGGTGAGCCACCTATGAAAGCTAAC	GTTAGCTTTCATAGGTGGCTCACCC
19	H9	1821	GCATGAGTAGGAGTAGTCCCTTCGC	GCATGAGTAGGAGTAGTCCCTTCGC
19	H10	1822	CCCGGGGAAATGACCAATGGTAACC	GGTTACCATTGGTCATTTCCCCGGG
19	H11	1823	CTCGCGTTGTACCCCTCAAGTAGCC	CTCGCGTTGTACCCCTCAAGTAGCC
19	H12	1824	TGTGCACCCTCTAGGGGAATAACAC	GTGTTATTCCCCTAGAGGGTGCACA
20	A1	1825	CAGTGACAGCTCTGGGGTCTGGTAC	CAGTGACAGCTCTGGGGTCTGGTAC
20	A2	1826	CCGACAGTGGAAGGCCTGACATGAT	ATCATGTCAGGCCTTCCACTGTCGG
20	A3	1827	CAGTCGGCTCTTGGTTATGAGGCCA	CAGTCGGCTCTTGGTTATGAGGCCA
20	A4	1828	ATGGGAACATCTAAAGGAGACGCGC	GCGCGTCTCCTTTAGATGTTCCCAT
20	A5	1829	CTCTTCTCCGTTGTGGGTAGATGGC	CTCTTCTCCGTTGTGGGTAGATGGC
20	A6	1830	ACCCATTAATAAGCCAGAGGGGCAC	GTGCCCCTCTGGCTTATTAATGGGT
20	A7	1831	GTCTTGAGTTGTGAGCGCCAGCATC	GTCTTGAGTTGTGAGCGCCAGCATC
20	A8	1832	GGTCATACTACCAGAGCGGGCTGAA	TTCAGCCCGCTCTGGTAGTATGACC
20	A9	1833	TGCAGTCAGTTGTCCGCTTTCATCT	TGCAGTCAGTTGTCCGCTTTCATCT
20	A10	1834	CAAGGCAGCACGCAGGTACCTAACT	AGTTAGGTACCTGCGTGCTGCCTTG
20	A11	1835	TGCTGTCTAGCACAGTACTGGCCTT	TGCTGTCTAGCACAGTACTGGCCTT
20	A12	1836	AGAGAAACGCCGGGAAGCACCTATA	TATAGGTGCTTCCCGGCGTTTCTCT
20	B1	1837	TGTCCTGTGTGCCTGGCTTACACAT	TGTCCTGTGTGCCTGGCTTACACAT
20	B2	1838	CAGAGTACCTGCCTAGCTGGCCAAA	TTTGGCCAGCTAGGCAGGTACTCTG
20	B3	1839	TGGTGGTTTCGCTCTCCCTATTGCG	TGGTGGTTTCGCTCTCCCTATTGCG
20	B4	1840	GGGCGCTAACCCTAATACCCGAAAC	GTTTCGGGTATTAGGGTTAGCGCCC
20	B5	1841	GAGCCTGTTGGGTTTTGGTTGCACA	GAGCCTGTTGGGTTTTGGTTGCACA
20	B6	1842	GACTCCAGGGACCCTGAAATCTCCA	TGGAGATTTCAGGGTCCCTGGAGTC
20	B7	1843	CATGTAGGGACCTGTGGTCAGCCTA	CATGTAGGGACCTGTGGTCAGCCTA
20	B8	1844	TGATCATAGGAAGCCCTGCCCCAAG	CTTGGGGCAGGGCTTCCTATGATCA
20	B9	1845	GGTGTGTTTTCATCTATCCGGGTCC	GGTGTGTTTTCATCTATCCGGGTCC
20	B10	1846	ACTGAGAGACCCTCATGGACGACAT	ATGTCGTCCATGAGGGTCTCTCAGT
20	B11	1847	CCAGGACATTCCTAGTTCAGCGGCT	CCAGGACATTCCTAGTTCAGCGGCT
20	B12	1848	TATGCCAGAGCTCCACGGGGTAAAG	CTTTACCCCGTGGAGCTCTGGCATA
20	C1	1849	GTGTTGAGAGCACTCAGTGTCCCGA	GTGTTGAGAGCACTCAGTGTCCCGA
20	C2	1850	TAAGGATGCCCAACCATACTGAGGG	CCCTCAGTATGGTTGGGCATCCTTA
20	C3	1851	CCCCGCGTGGGTATCAGGTATTAGC	CCCCGCGTGGGTATCAGGTATTAGC
20	C4	1852	GGCTGGCTGCTGGGTGAGTATCAAT	ATTGATACTCACCCAGCAGCCAGCC
20	C5	1853	GATGCTACTCTTCCTTGCTGGGTCA	GATGCTACTCTTCCTTGCTGGGTCA
20	C6	1854	GGATCAAGACACCCCGGCCACTAAT	ATTAGTGGCCGGGGTGTCTTGATCC
20	C7	1855	GTGAGGCGTGTAGCACAGGTCCTTA	GTGAGGCGTGTAGCACAGGTCCTTA
20	C8	1856	GCACCACGTCAAACCAGATACAGGC	GCCTGTATCTGGTTTGACGTGGTGC
20	C9	1857	GTTTTGGTACGGAGTCGGGGTCTCT	GTTTTGGTACGGAGTCGGGGTCTCT
20	C10	1858	ACCGGCGAAACCTAGGACTAGTCCT	AGGACTAGTCCTAGGTTTCGCCGGT
20	C11	1859	GTTTAGGTTGTCGCGGCCAGGATCA	GTTTAGGTTGTCGCGGCCAGGATCA
20	C12	1860	CCATACGCTCCTGGGAAGAACAACC	GGTTGTTCTTCCCAGGAGCGTATGG
20	D1	1861	AGCGAAGTTTCTTCCCTGGGCTAGC	AGCGAAGTTTCTTCCCTGGGCTAGC
20	D2	1862	GGGCTATGAACCATGGACCCAGATA	TATCTGGGTCCATGGTTCATAGCCC
20	D3	1863	TCCCTGTTTACCTAGTGTCCCTTAC	TCCCTGTTTACCTAGTGTCCCTTAC
20	D4	1864	GAAAGGGTAATCCCGGCTGATGGGA	TCCCATCAGCCGGGATTACCCTTTC
20	D5	1865	GAGTCACGGTAGCTCTGGTCGTTGT	GAGTCACGGTAGCTCTGGTCGTTGT
20	D6	1866	AAACCACTATCCAGCTGCGCCTAGC	GCTAGGCGCAGCTGGATAGTGGTTT
20	D7	1867	GTTCCGTAGGCTGAGGCTGTTCTAG	GTTCCGTAGGCTGAGGCTGTTCTAG
20	D8	1868	TAGGGTGAAAGGCCGTAAACCCACT	AGTGGGTTTACGGCCTTTCACCCTA
20	D9	1869	ATCTCTTCCGCATATGCCCTCTGCG	ATCTCTTCCGCATATGCCCTCTGCG
20	D10	1870	GATACCGCCGAAAGACCTACGGAAC	GTTCCGTAGGTCTTTCGGCGGTATC
20	D11	1871	GATTCTCCTCAGAGTCGTCGGGCTA	GATTCTCCTCAGAGTCGTCGGGCTA
20	D12	1872	GGAGGTGATACACCTCTCTACTGCC	GGCAGTAGAGAGGTGTATCACCTCC
20	E1	1873	TGGGTATTCCCGCCTTAGTAGGAGC	TGGGTATTCCCGCCTTAGTAGGAGC
20	E2	1874	AACAGAGTCTACGAAGGGCGCAACT	AGTTGCGCCCTTCGTAGACTCTGTT
20	E3	1875	TCTTATCGCTCCGGTCGTTGTCCTG	TCTTATCGCTCCGGTCGTTGTCCTG
20	E4	1876	AGTGCGAGACCACTAGCAACGGATG	CATCCGTTGCTAGTGGTCTCGCACT
20	E5	1877	TTGCTAGTTGCGGAGCCATGTTCCT	TTGCTAGTTGCGGAGCCATGTTCCT
20	E6	1878	GGACAATGAAGCAGGCCCCACTATA	TATAGTGGGGCCTGCTTCATTGTCC
20	E7	1879	CTCCGCCTCGTCCCACTATTCAGAT	CTCCGCCTCGTCCCACTATTCAGAT
20	E8	1880	GGGGTCCTGACTAAACCTCCGAAAC	GTTTCGGAGGTTTAGTCAGGACCCC
20	E9	1881	TATGTGGTCACGTGCAGTGCTGGTC	TATGTGGTCACGTGCAGTGCTGGTC
20	E10	1882	CACCAGCGACACAGAGACCGCATAG	CTATGCGGTCTCTGTGTCGCTGGTG
20	E11	1883	CCTCCCTATGCTGCAGGCGTCTAAC	CCTCCCTATGCTGCAGGCGTCTAAC
20	E12	1884	ACACTCAAGGCGGTCAAGAACCCTG	CAGGGTTCTTGACCGCCTTGAGTGT
20	F1	1885	ATGTTGTCGGGTGGCTCCAGTAGTA	ATGTTGTCGGGTGGCTCCAGTAGTA
20	F2	1886	GTAAGAGGTGGACACAAACCCCTAC	GTAGGGGTTTGTGTCCACCTCTTAC
20	F3	1887	GTTTCCAGTCGGCGTCTACCTCATT	GTTTCCAGTCGGCGTCTACCTCATT
20	F4	1888	GGTGGGAGGGATTCCACAAAACCAG	CTGGTTTTGTGGAATCCCTCCCACC
20	F5	1889	ACTGGTTGTTTAGGCCCGTGTGAGT	ACTGGTTGTTTAGGCCCGTGTGAGT
20	F6	1890	TCTATCAGGGACACTACTCGGGCCG	CGGCCCGAGTAGTGTCCCTGATAGA
20	F7	1891	GCTAGCAGGTACCAGCGTTGCTACT	GCTAGCAGGTACCAGCGTTGCTACT
20	F8	1892	GGAGCGACTATACCCCACTCTGAAC	GTTCAGAGTGGGGTATAGTCGCTCC
20	F9	1893	TTTAGTCCGTGGCGCGTAGCCCTAT	TTTAGTCCGTGGCGCGTAGCCCTAT
20	F10	1894	ATAGAACAGGGTAGCAGGGCGAAAA	TTTTCGCCCTGCTACCCTGTTCTAT
20	F11	1895	GTCATGCAGTAAGGGTGGTAGGGCT	GTCATGCAGTAAGGGTGGTAGGGCT
20	F12	1896	GAAGTCCCCTAGCTGGTATGCACCC	GGGTGCATACCAGCTAGGGGACTTC
20	G1	1897	CTACTCCGTCCTACACGTCCTTGCT	CTACTCCGTCCTACACGTCCTTGCT
20	G2	1898	AAGAAACCAACCTCCGGCTAGCACT	AGTGCTAGCCGGAGGTTGGTTTCTT
20	G3	1899	GTATGCTAGTGCTCGGTGGTCTCAT	GTATGCTAGTGCTCGGTGGTCTCAT
20	G4	1900	GTCATGATCCAGAACGGACGGAGCC	GGCTCCGTCCGTTCTGGATCATGAC
20	G5	1901	TGTTTACTGTAGGGCAGGTGACCCC	TGTTTACTGTAGGGCAGGTGACCCC
20	G6	1902	CAGGAATAGAGCTCACGGGTAGGGT	ACCCTACCCGTGAGCTCTATTCCTG
20	G7	1903	GCTCAGATGCATGGTTTGCCCATGT	GCTCAGATGCATGGTTTGCCCATGT
20	G8	1904	CGACGAGGAGGGAAAAGTAGCTCGG	CCGAGCTACTTTTCCCTCCTCGTCG
20	G9	1905	AGTAGGTCGCCCCGGTCATGATGTA	AGTAGGTCGCCCCGGTCATGATGTA
20	G10	1906	TTGGGTGAACGGAACCCCAGTACAC	GTGTACTGGGGTTCCGTTCACCCAA
20	G11	1907	GTAAGACCAGTTGGTGGCAGTCCCA	GTAAGACCAGTTGGTGGCAGTCCCA
20	G12	1908	AACCTCTGACTGAGGAGAACCACGT	ACGTGGTTCTCCTCAGTCAGAGGTT
20	H1	1909	AGGCTCCTAATGCTGGCTTTCTCCA	AGGCTCCTAATGCTGGCTTTCTCCA
20	H2	1910	ACCAGGGATGTAGCCCAGATCCTCA	TGAGGATCTGGGCTACATCCCTGGT
20	H3	1911	GCAGTTTGCAGTTAGCGTACCCTTC	GCAGTTTGCAGTTAGCGTACCCTTC
20	H4	1912	AACGACACCTGGCGACAAGCTCTAG	CTAGAGCTTGTCGCCAGGTGTCGTT
20	H5	1913	GATTCTTAGCCCTCCGGGCAAGTTC	GATTCTTAGCCCTCCGGGCAAGTTC
20	H6	1914	TGGTACGAAACCGAGCCTCTGGACA	TGTCCAGAGGCTCGGTTTCGTACCA
20	H7	1915	ATTGGGTCCGCAGTGTCTTAGGCAT	ATTGGGTCCGCAGTGTCTTAGGCAT
20	H8	1916	TAGAGCCACAACGCTAGAGCGAACT	AGTTCGCTCTAGCGTTGTGGCTCTA
20	H9	1917	GTGCAGGGCACTTCCGCTGTACTAT	GTGCAGGGCACTTCCGCTGTACTAT
20	H10	1918	GGTAGAAGCCTTCCCACCGAGACAC	GTGTCTCGGTGGGAAGGCTTCTACC
20	H11	1919	GTGGTTATCCCATCCAGCGCATCAC	GTGGTTATCCCATCCAGCGCATCAC
20	H12	1920	GAGAGGAGGCCTAATTCACCCAAGG	CCTTGGGTGAATTAGGCCTCCTCTC
21	A1	1921	GAGTCGAGGTTCTCTCCGTAGCTCG	GAGTCGAGGTTCTCTCCGTAGCTCG
21	A2	1922	CTCCCTACTACCCGGAACAGACAAC	GTTGTCTGTTCCGGGTAGTAGGGAG
21	A3	1923	TTAGTACTCTGCCCGTAGGGGTTCA	TTAGTACTCTGCCCGTAGGGGTTCA
21	A4	1924	GCAGCTGCACTAAAGATCACACGCC	GGCGTGTGATCTTTAGTGCAGCTGC
21	A5	1925	TGGGTCTCATGCAGCCTATGTGGTG	TGGGTCTCATGCAGCCTATGTGGTG
21	A6	1926	GGGGACGAGGGTAACGGCAATATCG	CGATATTGCCGTTACCCTCGTCCCC
21	A7	1927	TAGGCTTCGGCATGTCCTCATCAGT	TAGGCTTCGGCATGTCCTCATCAGT
21	A8	1928	ATAAGCGCAGAACGCAGGGGCAATA	TATTGCCCCTGCGTTCTGCGCTTAT
21	A9	1929	CTGTCATAGCGCCGGTGATGTCTCC	CTGTCATAGCGCCGGTGATGTCTCC
21	A10	1930	CTGGGAGTCCCAATACCCGCTAACC	GGTTAGCGGGTATTGGGACTCCCAG
21	A11	1931	GTACGACGGTTGCTCTGGGTTCCTC	GTACGACGGTTGCTCTGGGTTCCTC
21	A12	1932	ACTGCTATCGGGCACATACAGAGAC	GTCTCTGTATGTGCCCGATAGCAGT
21	B1	1933	TATCTTGGTGAGCCCTCCTAGTAGC	TATCTTGGTGAGCCCTCCTAGTAGC
21	B2	1934	GGCCGAACCAGAGTCGACAGACAAA	TTTGTCTGTCGACTCTGGTTCGGCC
21	B3	1935	CACCATATACCTCCCTAGGTGCTGC	CACCATATACCTCCCTAGGTGCTGC
21	B4	1936	CCCTAAGACCACGGGAAGTCAACCT	AGGTTGACTTCCCGTGGTCTTAGGG
21	B5	1937	GTCGTTGGCATTGAGCTCCTACTGC	GTCGTTGGCATTGAGCTCCTACTGC
21	B6	1938	AGCCCGAACGCAGGCAAATAGAGAA	TTCTCTATTTGCCTGCGTTCGGGCT
21	B7	1939	GTACCTAGAGTGCCCCGGAGCATTA	GTACCTAGAGTGCCCCGGAGCATTA
21	B8	1940	GTGGCTAAGGGCACCATAAGACCAT	ATGGTCTTATGGTGCCCTTAGCCAC
21	B9	1941	TCCTACTGTTCGTGTCAGACCGTCC	TCCTACTGTTCGTGTCAGACCGTCC
21	B10	1942	GAAGCTAGAGCCAGAAACGCGATCC	GGATCGCGTTTCTGGCTCTAGCTTC
21	B11	1943	TCCCTCACAGCCTGCTGGACTTTTG	TCCCTCACAGCCTGCTGGACTTTTG
21	B12	1944	GTCACGCTGACCTACGAGACGACCT	AGGTCGTCTCGTAGGTCAGCGTGAC
21	C1	1945	CTTGCTTGCGTTCTCATGCCTCACT	CTTGCTTGCGTTCTCATGCCTCACT
21	C2	1946	GTGAGAAGCCCAGGCTAGACGTAGT	ACTACGTCTAGCCTGGGCTTCTCAC
21	C3	1947	GGGATAAGTCCCTCGCCATAGGTGC	GGGATAAGTCCCTCGCCATAGGTGC
21	C4	1948	TAGCGACTGCCGCATAAGCCTAGAC	GTCTAGGCTTATGCGGCAGTCGCTA
21	C5	1949	GCACGTGGGTCCCCTTATCTGGATA	GCACGTGGGTCCCCTTATCTGGATA
21	C6	1950	GAACTCAAGAGAGGCCATAGAAGAC	GTCTTCTATGGCCTCTCTTGAGTTC
21	C7	1951	TGCTTTTATGTACGGCTCCCCTCCG	TGCTTTTATGTACGGCTCCCCTCCG
21	C8	1952	CACCCTGAGGAGCTGGTACTCGTAC	GTACGAGTACCAGCTCCTCAGGGTG
21	C9	1953	TACTGTTGGTCTCGCTTGGTGCCAG	TACTGTTGGTCTCGCTTGGTGCCAG
21	C10	1954	GGCCCAGTTGAGGACAAACTGTGAC	GTCACAGTTTGTCCTCAACTGGGCC
21	C11	1955	GTAGCGCGTGGCAGTATATGTCCCA	GTAGCGCGTGGCAGTATATGTCCCA
21	C12	1956	TCTGCAGTAAGGCCCATAGGAGTGG	CCACTCCTATGGGCCTTACTGCAGA
21	D1	1957	GTTGTACAGCCCTGTAGTTGCGCTA	GTTGTACAGCCCTGTAGTTGCGCTA
21	D2	1958	CGGAGGGAATCCACCTAGCTAACAC	GTGTTAGCTAGGTGGATTCCCTCCG
21	D3	1959	TTCTGGCTTGTTACCTGCCGTCACT	TTCTGGCTTGTTACCTGCCGTCACT
21	D4	1960	GACAATAGGCGACGACCGACTCTCC	GGAGAGTCGGTCGTCGCCTATTGTC
21	D5	1961	ATTCGGCTCTCCCGCTAGTGGGATA	ATTCGGCTCTCCCGCTAGTGGGATA
21	D6	1962	TAGCTGAGCGGTACCTGGAACTAGA	TCTAGTTCCAGGTACCGCTCAGCTA
21	D7	1963	ACTCTCGCTGTGCGTATCTGCTGTC	ACTCTCGCTGTGCGTATCTGCTGTC
21	D8	1964	GCTAGTGACAGCTCAGGGATTGAGC	GCTCAATCCCTGAGCTGTCACTAGC
21	D9	1965	CTCTCTTCAGGGCCATTCGGAGCTA	CTCTCTTCAGGGCCATTCGGAGCTA
21	D10	1966	AGGAGACCTCGACCGAGACGTAACT	AGTTACGTCTCGGTCGAGGTCTCCT
21	D11	1967	ATCTGGCGTTCCGGTGAGGGTTCTA	ATCTGGCGTTCCGGTGAGGGTTCTA
21	D12	1968	GGAACACAACAGCGCAAACGGATAC	GTATCCGTTTGCGCTGTTGTGTTCC
21	E1	1969	GTGTGTCCATTACCCTTGGCATAGC	GTGTGTCCATTACCCTTGGCATAGC
21	E2	1970	CTACGAGACGAGCCAGAGAACCCAA	TTGGGTTCTCTGGCTCGTCTCGTAG
21	E3	1971	CATATTAGGGGTGTTGGGGCCACCT	CATATTAGGGGTGTTGGGGCCACCT
21	E4	1972	TACAGAGAGGGCAGTCATGCAGTCC	GGACTGCATGACTGCCCTCTCTGTA
21	E5	1973	GACCATGTTGCTCAGTGCCAGCATT	GACCATGTTGCTCAGTGCCAGCATT
21	E6	1974	GGGTGAAGGAGCGCTCTACTGGTAT	ATACCAGTAGAGCGCTCCTTCACCC
21	E7	1975	GCTAGGGTTGTCCGTACGACAGTCC	GCTAGGGTTGTCCGTACGACAGTCC
21	E8	1976	GGGAGCCACATCTCGAACTCTGCAG	CTGCAGAGTTCGAGATGTGGCTCCC
21	E9	1977	CTCTTTGGCTGTCCAGTCGATCCTA	CTCTTTGGCTGTCCAGTCGATCCTA
21	E10	1978	TAGACCGGACTGGGCGCACTCATAT	ATATGAGTGCGCCCAGTCCGGTCTA
21	E11	1979	CTGGCTTTCACGTCAGCTACCACCT	CTGGCTTTCACGTCAGCTACCACCT
21	E12	1980	GGCGAGACCACCCTACAACAGGATT	AATCCTGTTGTAGGGTGGTCTCGCC
21	F1	1981	GTATCTTTCGGGTCGAGCTCCGGTT	GTATCTTTCGGGTCGAGCTCCGGTT
21	F2	1982	AGGAATTACTCAGGGATGCAGACCC	GGGTCTGCATCCCTGAGTAATTCCT
21	F3	1983	TGTATTAGGCCGCCCGTGTTGTCTT	TGTATTAGGCCGCCCGTGTTGTCTT
21	F4	1984	ACCACTACTATGCCCCAACCTGGTC	GACCAGGTTGGGGCATAGTAGTGGT
21	F5	1985	GTAGGTGTAGTCGTCTACCACCCTG	GTAGGTGTAGTCGTCTACCACCCTG
21	F6	1986	CTCCGTGGGAGCGAAACGACTACAC	GTGTAGTCGTTTCGCTCCCACGGAG
21	F7	1987	GGTTTCGTTTTGTGGGACCTTCTCC	GGTTTCGTTTTGTGGGACCTTCTCC
21	F8	1988	AGTACCCAAAGGGCATCACCTACGG	CCGTAGGTGATGCCCTTTGGGTACT
21	F9	1989	CTCTTCTAGGCAGTCGGGACCTGTA	CTCTTCTAGGCAGTCGGGACCTGTA
21	F10	1990	CCAAAGACAGGCGGGTATGCACTAC	GTAGTGCATACCCGCCTGTCTTTGG
21	F11	1991	AGGTCCATGGCGCTGTGCTCTTATT	AGGTCCATGGCGCTGTGCTCTTATT
21	F12	1992	GGCATAAACGAGGAATCTAGGCGCC	GGCGCCTAGATTCCTCGTTTATGCC
21	G1	1993	ATACTTCAGGCTCACTTGGCCAGGT	ATACTTCAGGCTCACTTGGCCAGGT
21	G2	1994	ACGGTCTAGCCCTAGAACAACCCAG	CTGGGTTGTTCTAGGGCTAGACCGT
21	G3	1995	GGCCTCTTACGGTTCGACCTCTCAT	GGCCTCTTACGGTTCGACCTCTCAT
21	G4	1996	ACTCAAGAAGGCGGAACTACCTCGG	CCGAGGTAGTTCCGCCTTCTTGAGT
21	G5	1997	GTTCATGCCCACCCTCACCTAACTC	GTTCATGCCCACCCTCACCTAACTC
21	G6	1998	GGAATACCCCACGAGCCGACAATAC	GTATTGTCGGCTCGTGGGGTATTCC
21	G7	1999	ATTGCTGCCCTCACCACTACTTCCA	ATTGCTGCCCTCACCACTACTTCCA
[truncated: 1,317 more rows]
