# Supplementary material for: HT-smFISH: a cost-effective and flexible workflow for high-throughput single-molecule RNA imaging
Source: Springer Nature journal article supplement (doi:10.1038/s41596-022-00750-2), 2022-10-24
Supplement: MOESM3 [file 41596_2022_750_MOESM3_ESM22.xlsx]

## Sheet: Merged_sets_withComplementSeq_O
ENST	ENSG.x	GeneName.x	SET	ENSG.y	GeneName.y	dGOpt	theStartPos	theEndPos	ProbeSize	Seq	dGScore	dG37	GCpc	GCFilter	aCompFilter	aStackFilter	cCompFilter	cStackFilter	cSpecStackFilter	NbOfPNAS	PNASFilter	RSESeqFilter	InsideUTR	BC1ID	BC1PN	BC1WP	BC1	BC2ID	BC2PN	BC2WP	BC2	BC1YHybXBC2	WithComplementSeq
ENST00000374736	ENSG00000165029	ABCA1	set16	ENSG00000165029	ABCA1	-46	8612	8645	34	CTAGCTGTTTTCCCTGTTGAAGAATTCATTGTTT	0.977849	-54.2785	0.352941	1	1	1	0	1	1	4	1	1	0	1	1	A1	TCCCATGGGCAGTATCGCTTTGAGC	2	1	A2	GGTATACTCTCTGGCTGTTCTAGCC	TCCCATGGGCAGTATCGCTTTGAGCTTACACTCGGACCTCGTCGACATGCATTCTAGCTGTTTTCCCTGTTGAAGAATTCATTGTTTCCTCCTAAGTTTCGAGCTGGACTCAGTGGGTATACTCTCTGGCTGTTCTAGCC	TCCCATGGGCAGTATCGCTTTGAGCTTACACTCGGACCTCGTCGACATGCATTCTAGCTGTTTTCCCTGTTGAAGAATTCATTGTTTCCTCCTAAGTTTCGAGCTGGACTCAGTGGGTATACTCTCTGGCTGTTCTAGCCTTCT
ENST00000374736	ENSG00000165029	ABCA1	set16	ENSG00000165029	ABCA1	-46	8579	8610	32	GACTTGTGACCCTTATACTTTCTTGGCTTTTG	0.947849	-53.5785	0.40625	1	1	1	0	1	1	4	1	1	0	1	1	A1	TCCCATGGGCAGTATCGCTTTGAGC	2	1	A2	GGTATACTCTCTGGCTGTTCTAGCC	TCCCATGGGCAGTATCGCTTTGAGCTTACACTCGGACCTCGTCGACATGCATTGACTTGTGACCCTTATACTTTCTTGGCTTTTGCCTCCTAAGTTTCGAGCTGGACTCAGTGGGTATACTCTCTGGCTGTTCTAGCC	TCCCATGGGCAGTATCGCTTTGAGCTTACACTCGGACCTCGTCGACATGCATTGACTTGTGACCCTTATACTTTCTTGGCTTTTGCCTCCTAAGTTTCGAGCTGGACTCAGTGGGTATACTCTCTGGCTGTTCTAGCCTTCAGA
ENST00000374736	ENSG00000165029	ABCA1	set16	ENSG00000165029	ABCA1	-46	8408	8441	34	CTCTCTAGTCTTATACGTACGTACATACTCTTTC	0.957849	-55.1785	0.382353	1	1	1	0	1	1	4	1	1	0	1	1	A1	TCCCATGGGCAGTATCGCTTTGAGC	2	1	A2	GGTATACTCTCTGGCTGTTCTAGCC	TCCCATGGGCAGTATCGCTTTGAGCTTACACTCGGACCTCGTCGACATGCATTCTCTCTAGTCTTATACGTACGTACATACTCTTTCCCTCCTAAGTTTCGAGCTGGACTCAGTGGGTATACTCTCTGGCTGTTCTAGCC	TCCCATGGGCAGTATCGCTTTGAGCTTACACTCGGACCTCGTCGACATGCATTCTCTCTAGTCTTATACGTACGTACATACTCTTTCCCTCCTAAGTTTCGAGCTGGACTCAGTGGGTATACTCTCTGGCTGTTCTAGCCGATA
ENST00000374736	ENSG00000165029	ABCA1	set16	ENSG00000165029	ABCA1	-46	8267	8298	32	TTGCTTTCTAGGCACTAGTCATGACTGATATG	0.952151	-55.0785	0.40625	1	1	1	0	1	1	4	1	1	0	1	1	A1	TCCCATGGGCAGTATCGCTTTGAGC	2	1	A2	GGTATACTCTCTGGCTGTTCTAGCC	TCCCATGGGCAGTATCGCTTTGAGCTTACACTCGGACCTCGTCGACATGCATTTTGCTTTCTAGGCACTAGTCATGACTGATATGCCTCCTAAGTTTCGAGCTGGACTCAGTGGGTATACTCTCTGGCTGTTCTAGCC	TCCCATGGGCAGTATCGCTTTGAGCTTACACTCGGACCTCGTCGACATGCATTTTGCTTTCTAGGCACTAGTCATGACTGATATGCCTCCTAAGTTTCGAGCTGGACTCAGTGGGTATACTCTCTGGCTGTTCTAGCCTATCCA
ENST00000374736	ENSG00000165029	ABCA1	set16	ENSG00000165029	ABCA1	-46	8200	8228	29	CCATACTCCTCTATACCACAGGGTTCTAC	0.947849	-53.0785	0.482759	1	1	1	1	1	0	4	1	1	0	1	1	A1	TCCCATGGGCAGTATCGCTTTGAGC	2	1	A2	GGTATACTCTCTGGCTGTTCTAGCC	TCCCATGGGCAGTATCGCTTTGAGCTTACACTCGGACCTCGTCGACATGCATTCCATACTCCTCTATACCACAGGGTTCTACCCTCCTAAGTTTCGAGCTGGACTCAGTGGGTATACTCTCTGGCTGTTCTAGCC	TCCCATGGGCAGTATCGCTTTGAGCTTACACTCGGACCTCGTCGACATGCATTCCATACTCCTCTATACCACAGGGTTCTACCCTCCTAAGTTTCGAGCTGGACTCAGTGGGTATACTCTCTGGCTGTTCTAGCCACTCTGTTG
ENST00000374736	ENSG00000165029	ABCA1	set16	ENSG00000165029	ABCA1	-46	7945	7972	28	GCACAATCTCTTTAATCCCATGCCCTGG	0.907849	-51.9785	0.5	1	1	1	0	1	1	4	1	1	0	1	1	A1	TCCCATGGGCAGTATCGCTTTGAGC	2	1	A2	GGTATACTCTCTGGCTGTTCTAGCC	TCCCATGGGCAGTATCGCTTTGAGCTTACACTCGGACCTCGTCGACATGCATTGCACAATCTCTTTAATCCCATGCCCTGGCCTCCTAAGTTTCGAGCTGGACTCAGTGGGTATACTCTCTGGCTGTTCTAGCC	TCCCATGGGCAGTATCGCTTTGAGCTTACACTCGGACCTCGTCGACATGCATTGCACAATCTCTTTAATCCCATGCCCTGGCCTCCTAAGTTTCGAGCTGGACTCAGTGGGTATACTCTCTGGCTGTTCTAGCCTCTAATCACT
ENST00000374736	ENSG00000165029	ABCA1	set16	ENSG00000165029	ABCA1	-46	7889	7917	29	TGGCTGTTGATTCTTTGCCTCTTACCAGG	0.972151	-53.6785	0.482759	1	1	1	0	1	1	4	1	1	0	1	1	A1	TCCCATGGGCAGTATCGCTTTGAGC	2	1	A2	GGTATACTCTCTGGCTGTTCTAGCC	TCCCATGGGCAGTATCGCTTTGAGCTTACACTCGGACCTCGTCGACATGCATTTGGCTGTTGATTCTTTGCCTCTTACCAGGCCTCCTAAGTTTCGAGCTGGACTCAGTGGGTATACTCTCTGGCTGTTCTAGCC	TCCCATGGGCAGTATCGCTTTGAGCTTACACTCGGACCTCGTCGACATGCATTTGGCTGTTGATTCTTTGCCTCTTACCAGGCCTCCTAAGTTTCGAGCTGGACTCAGTGGGTATACTCTCTGGCTGTTCTAGCCCCTGCCAGT
ENST00000374736	ENSG00000165029	ABCA1	set16	ENSG00000165029	ABCA1	-46	7761	7791	31	GAGACACCCACATTTTTGTTGCATGTTACTG	0.917849	-52.6785	0.419355	1	1	1	1	1	0	4	1	1	0	1	1	A1	TCCCATGGGCAGTATCGCTTTGAGC	2	1	A2	GGTATACTCTCTGGCTGTTCTAGCC	TCCCATGGGCAGTATCGCTTTGAGCTTACACTCGGACCTCGTCGACATGCATTGAGACACCCACATTTTTGTTGCATGTTACTGCCTCCTAAGTTTCGAGCTGGACTCAGTGGGTATACTCTCTGGCTGTTCTAGCC	TCCCATGGGCAGTATCGCTTTGAGCTTACACTCGGACCTCGTCGACATGCATTGAGACACCCACATTTTTGTTGCATGTTACTGCCTCCTAAGTTTCGAGCTGGACTCAGTGGGTATACTCTCTGGCTGTTCTAGCCATCTTGT
ENST00000374736	ENSG00000165029	ABCA1	set16	ENSG00000165029	ABCA1	-46	6974	7001	28	AGTGGTCATCATCACTTTGGTCCTTGGC	0.992151	-53.1785	0.5	1	1	1	0	1	1	4	1	1	0	1	1	A1	TCCCATGGGCAGTATCGCTTTGAGC	2	1	A2	GGTATACTCTCTGGCTGTTCTAGCC	TCCCATGGGCAGTATCGCTTTGAGCTTACACTCGGACCTCGTCGACATGCATTAGTGGTCATCATCACTTTGGTCCTTGGCCCTCCTAAGTTTCGAGCTGGACTCAGTGGGTATACTCTCTGGCTGTTCTAGCC	TCCCATGGGCAGTATCGCTTTGAGCTTACACTCGGACCTCGTCGACATGCATTAGTGGTCATCATCACTTTGGTCCTTGGCCCTCCTAAGTTTCGAGCTGGACTCAGTGGGTATACTCTCTGGCTGTTCTAGCCCCCGTAGCTT
ENST00000374736	ENSG00000165029	ABCA1	set16	ENSG00000165029	ABCA1	-46	6879	6906	28	TTGCTCTGGGAGAGGATGCTGAATATCC	0.992151	-53.6785	0.5	1	1	1	0	1	1	4	1	1	0	1	1	A1	TCCCATGGGCAGTATCGCTTTGAGC	2	1	A2	GGTATACTCTCTGGCTGTTCTAGCC	TCCCATGGGCAGTATCGCTTTGAGCTTACACTCGGACCTCGTCGACATGCATTTTGCTCTGGGAGAGGATGCTGAATATCCCCTCCTAAGTTTCGAGCTGGACTCAGTGGGTATACTCTCTGGCTGTTCTAGCC	TCCCATGGGCAGTATCGCTTTGAGCTTACACTCGGACCTCGTCGACATGCATTTTGCTCTGGGAGAGGATGCTGAATATCCCCTCCTAAGTTTCGAGCTGGACTCAGTGGGTATACTCTCTGGCTGTTCTAGCCACGGAACTTT
ENST00000374736	ENSG00000165029	ABCA1	set16	ENSG00000165029	ABCA1	-46	6814	6846	33	TATTGTAGCATGTTCCGGTGTTTCTCTTTTAGA	0.987849	-54.3785	0.363636	1	1	1	0	1	1	4	1	1	0	1	1	A1	TCCCATGGGCAGTATCGCTTTGAGC	2	1	A2	GGTATACTCTCTGGCTGTTCTAGCC	TCCCATGGGCAGTATCGCTTTGAGCTTACACTCGGACCTCGTCGACATGCATTTATTGTAGCATGTTCCGGTGTTTCTCTTTTAGACCTCCTAAGTTTCGAGCTGGACTCAGTGGGTATACTCTCTGGCTGTTCTAGCC	TCCCATGGGCAGTATCGCTTTGAGCTTACACTCGGACCTCGTCGACATGCATTTATTGTAGCATGTTCCGGTGTTTCTCTTTTAGACCTCCTAAGTTTCGAGCTGGACTCAGTGGGTATACTCTCTGGCTGTTCTAGCCCAAGG
ENST00000374736	ENSG00000165029	ABCA1	set16	ENSG00000165029	ABCA1	-46	6756	6780	25	TGGACAGGCTTCAGGTCCGGGTTGG	0.902151	-53.1785	0.64	1	1	1	0	1	1	4	1	1	0	1	1	A1	TCCCATGGGCAGTATCGCTTTGAGC	2	1	A2	GGTATACTCTCTGGCTGTTCTAGCC	TCCCATGGGCAGTATCGCTTTGAGCTTACACTCGGACCTCGTCGACATGCATTTGGACAGGCTTCAGGTCCGGGTTGGCCTCCTAAGTTTCGAGCTGGACTCAGTGGGTATACTCTCTGGCTGTTCTAGCC	TCCCATGGGCAGTATCGCTTTGAGCTTACACTCGGACCTCGTCGACATGCATTTGGACAGGCTTCAGGTCCGGGTTGGCCTCCTAAGTTTCGAGCTGGACTCAGTGGGTATACTCTCTGGCTGTTCTAGCCAGTGATTTTAACT
ENST00000374736	ENSG00000165029	ABCA1	set16	ENSG00000165029	ABCA1	-46	6722	6754	33	CCCTGCTATTCGTACAACTATTGTATAACCATC	0.992151	-54.3785	0.393939	1	1	1	1	1	0	4	1	1	0	1	1	A1	TCCCATGGGCAGTATCGCTTTGAGC	2	1	A2	GGTATACTCTCTGGCTGTTCTAGCC	TCCCATGGGCAGTATCGCTTTGAGCTTACACTCGGACCTCGTCGACATGCATTCCCTGCTATTCGTACAACTATTGTATAACCATCCCTCCTAAGTTTCGAGCTGGACTCAGTGGGTATACTCTCTGGCTGTTCTAGCC	TCCCATGGGCAGTATCGCTTTGAGCTTACACTCGGACCTCGTCGACATGCATTCCCTGCTATTCGTACAACTATTGTATAACCATCCCTCCTAAGTTTCGAGCTGGACTCAGTGGGTATACTCTCTGGCTGTTCTAGCCAGATA
ENST00000374736	ENSG00000165029	ABCA1	set16	ENSG00000165029	ABCA1	-46	6630	6659	30	TTGCCATCCTAGTGCAAAGAGCTTCACATT	0.982151	-53.9785	0.433333	1	1	1	1	1	0	4	1	1	0	1	1	A1	TCCCATGGGCAGTATCGCTTTGAGC	2	1	A2	GGTATACTCTCTGGCTGTTCTAGCC	TCCCATGGGCAGTATCGCTTTGAGCTTACACTCGGACCTCGTCGACATGCATTTTGCCATCCTAGTGCAAAGAGCTTCACATTCCTCCTAAGTTTCGAGCTGGACTCAGTGGGTATACTCTCTGGCTGTTCTAGCC	TCCCATGGGCAGTATCGCTTTGAGCTTACACTCGGACCTCGTCGACATGCATTTTGCCATCCTAGTGCAAAGAGCTTCACATTCCTCCTAAGTTTCGAGCTGGACTCAGTGGGTATACTCTCTGGCTGTTCTAGCCCCAATAAT
ENST00000374736	ENSG00000165029	ABCA1	set16	ENSG00000165029	ABCA1	-46	6566	6594	29	CCCTCCTTGACAACACTTAGGGCACAATT	0.972151	-53.3785	0.482759	1	1	1	1	1	0	4	1	1	0	1	1	A1	TCCCATGGGCAGTATCGCTTTGAGC	2	1	A2	GGTATACTCTCTGGCTGTTCTAGCC	TCCCATGGGCAGTATCGCTTTGAGCTTACACTCGGACCTCGTCGACATGCATTCCCTCCTTGACAACACTTAGGGCACAATTCCTCCTAAGTTTCGAGCTGGACTCAGTGGGTATACTCTCTGGCTGTTCTAGCC	TCCCATGGGCAGTATCGCTTTGAGCTTACACTCGGACCTCGTCGACATGCATTCCCTCCTTGACAACACTTAGGGCACAATTCCTCCTAAGTTTCGAGCTGGACTCAGTGGGTATACTCTCTGGCTGTTCTAGCCCTGAGAGAC
ENST00000374736	ENSG00000165029	ABCA1	set16	ENSG00000165029	ABCA1	-46	6456	6484	29	CATGGCTGTAGAGAGCTTGCGTTTGTTGC	0.922151	-54.4785	0.517241	1	1	1	0	1	1	4	1	1	0	1	1	A1	TCCCATGGGCAGTATCGCTTTGAGC	2	1	A2	GGTATACTCTCTGGCTGTTCTAGCC	TCCCATGGGCAGTATCGCTTTGAGCTTACACTCGGACCTCGTCGACATGCATTCATGGCTGTAGAGAGCTTGCGTTTGTTGCCCTCCTAAGTTTCGAGCTGGACTCAGTGGGTATACTCTCTGGCTGTTCTAGCC	TCCCATGGGCAGTATCGCTTTGAGCTTACACTCGGACCTCGTCGACATGCATTCATGGCTGTAGAGAGCTTGCGTTTGTTGCCCTCCTAAGTTTCGAGCTGGACTCAGTGGGTATACTCTCTGGCTGTTCTAGCCTTGGCGGCA
ENST00000374736	ENSG00000165029	ABCA1	set16	ENSG00000165029	ABCA1	-46	6394	6419	26	TCACGAGGCCCAGTTTCCGAATCGCC	0.902151	-53.7785	0.615385	1	1	1	0	1	1	4	1	1	0	1	1	A1	TCCCATGGGCAGTATCGCTTTGAGC	2	1	A2	GGTATACTCTCTGGCTGTTCTAGCC	TCCCATGGGCAGTATCGCTTTGAGCTTACACTCGGACCTCGTCGACATGCATTTCACGAGGCCCAGTTTCCGAATCGCCCCTCCTAAGTTTCGAGCTGGACTCAGTGGGTATACTCTCTGGCTGTTCTAGCC	TCCCATGGGCAGTATCGCTTTGAGCTTACACTCGGACCTCGTCGACATGCATTTCACGAGGCCCAGTTTCCGAATCGCCCCTCCTAAGTTTCGAGCTGGACTCAGTGGGTATACTCTCTGGCTGTTCTAGCCGACTGTTAAGCA
ENST00000374736	ENSG00000165029	ABCA1	set16	ENSG00000165029	ABCA1	-46	7513	7540	28	CTGGGCATGGCATGGCTTAGTGAATGAG	0.932151	-53.6785	0.535714	1	1	1	0	1	1	4	1	1	0	1	1	A1	TCCCATGGGCAGTATCGCTTTGAGC	2	1	A2	GGTATACTCTCTGGCTGTTCTAGCC	TCCCATGGGCAGTATCGCTTTGAGCTTACACTCGGACCTCGTCGACATGCATTCTGGGCATGGCATGGCTTAGTGAATGAGCCTCCTAAGTTTCGAGCTGGACTCAGTGGGTATACTCTCTGGCTGTTCTAGCC	TCCCATGGGCAGTATCGCTTTGAGCTTACACTCGGACCTCGTCGACATGCATTCTGGGCATGGCATGGCTTAGTGAATGAGCCTCCTAAGTTTCGAGCTGGACTCAGTGGGTATACTCTCTGGCTGTTCTAGCCCATCAACGGT
ENST00000374736	ENSG00000165029	ABCA1	set16	ENSG00000165029	ABCA1	-46	7270	7296	27	GCTACAAAGGCACTGCCCCTGTAATGG	0.992151	-52.7785	0.555556	1	1	1	1	0	1	4	1	1	0	1	1	A1	TCCCATGGGCAGTATCGCTTTGAGC	2	1	A2	GGTATACTCTCTGGCTGTTCTAGCC	TCCCATGGGCAGTATCGCTTTGAGCTTACACTCGGACCTCGTCGACATGCATTGCTACAAAGGCACTGCCCCTGTAATGGCCTCCTAAGTTTCGAGCTGGACTCAGTGGGTATACTCTCTGGCTGTTCTAGCC	TCCCATGGGCAGTATCGCTTTGAGCTTACACTCGGACCTCGTCGACATGCATTGCTACAAAGGCACTGCCCCTGTAATGGCCTCCTAAGTTTCGAGCTGGACTCAGTGGGTATACTCTCTGGCTGTTCTAGCCCGGGCCGTTCA
ENST00000374736	ENSG00000165029	ABCA1	set16	ENSG00000165029	ABCA1	-46	7105	7133	29	TTTACTTTCAGCCACCCCGTATGAACAGG	0.987849	-52.9785	0.482759	1	1	1	1	0	1	4	1	1	0	1	1	A1	TCCCATGGGCAGTATCGCTTTGAGC	2	1	A2	GGTATACTCTCTGGCTGTTCTAGCC	TCCCATGGGCAGTATCGCTTTGAGCTTACACTCGGACCTCGTCGACATGCATTTTTACTTTCAGCCACCCCGTATGAACAGGCCTCCTAAGTTTCGAGCTGGACTCAGTGGGTATACTCTCTGGCTGTTCTAGCC	TCCCATGGGCAGTATCGCTTTGAGCTTACACTCGGACCTCGTCGACATGCATTTTTACTTTCAGCCACCCCGTATGAACAGGCCTCCTAAGTTTCGAGCTGGACTCAGTGGGTATACTCTCTGGCTGTTCTAGCCCACCACAAA
ENST00000374736	ENSG00000165029	ABCA1	set16	ENSG00000165029	ABCA1	-46	7003	7035	33	ACTGTCTGGTTTTTGTGTAATGAGAGGTCTTTT	0.992151	-54.4785	0.363636	1	1	1	0	1	1	4	1	1	0	1	1	A1	TCCCATGGGCAGTATCGCTTTGAGC	2	1	A2	GGTATACTCTCTGGCTGTTCTAGCC	TCCCATGGGCAGTATCGCTTTGAGCTTACACTCGGACCTCGTCGACATGCATTACTGTCTGGTTTTTGTGTAATGAGAGGTCTTTTCCTCCTAAGTTTCGAGCTGGACTCAGTGGGTATACTCTCTGGCTGTTCTAGCC	TCCCATGGGCAGTATCGCTTTGAGCTTACACTCGGACCTCGTCGACATGCATTACTGTCTGGTTTTTGTGTAATGAGAGGTCTTTTCCTCCTAAGTTTCGAGCTGGACTCAGTGGGTATACTCTCTGGCTGTTCTAGCCGGTCC
ENST00000374736	ENSG00000165029	ABCA1	set16	ENSG00000165029	ABCA1	-46	8510	8538	29	TATTGTTACAGTGGGCTCCTACAACCACA	0.967849	-52.8785	0.448276	1	1	1	1	1	1	5	1	1	0	1	1	A1	TCCCATGGGCAGTATCGCTTTGAGC	2	1	A2	GGTATACTCTCTGGCTGTTCTAGCC	TCCCATGGGCAGTATCGCTTTGAGCTTACACTCGGACCTCGTCGACATGCATTTATTGTTACAGTGGGCTCCTACAACCACACCTCCTAAGTTTCGAGCTGGACTCAGTGGGTATACTCTCTGGCTGTTCTAGCC	TCCCATGGGCAGTATCGCTTTGAGCTTACACTCGGACCTCGTCGACATGCATTTATTGTTACAGTGGGCTCCTACAACCACACCTCCTAAGTTTCGAGCTGGACTCAGTGGGTATACTCTCTGGCTGTTCTAGCCCAGTGAAAC
ENST00000374736	ENSG00000165029	ABCA1	set16	ENSG00000165029	ABCA1	-46	7974	8000	27	ATGGGCACAGGCTTCCCTAGGTTTGAA	0.992151	-52.7785	0.518519	1	1	1	1	1	1	5	1	1	0	1	1	A1	TCCCATGGGCAGTATCGCTTTGAGC	2	1	A2	GGTATACTCTCTGGCTGTTCTAGCC	TCCCATGGGCAGTATCGCTTTGAGCTTACACTCGGACCTCGTCGACATGCATTATGGGCACAGGCTTCCCTAGGTTTGAACCTCCTAAGTTTCGAGCTGGACTCAGTGGGTATACTCTCTGGCTGTTCTAGCC	TCCCATGGGCAGTATCGCTTTGAGCTTACACTCGGACCTCGTCGACATGCATTATGGGCACAGGCTTCCCTAGGTTTGAACCTCCTAAGTTTCGAGCTGGACTCAGTGGGTATACTCTCTGGCTGTTCTAGCCATGAGTTCCTT
ENST00000374736	ENSG00000165029	ABCA1	set16	ENSG00000165029	ABCA1	-46	7701	7727	27	AGGATGTTAGCCACGCATGGCACCATT	0.977849	-52.3785	0.518519	1	1	1	1	1	1	5	1	1	0	1	1	A1	TCCCATGGGCAGTATCGCTTTGAGC	2	1	A2	GGTATACTCTCTGGCTGTTCTAGCC	TCCCATGGGCAGTATCGCTTTGAGCTTACACTCGGACCTCGTCGACATGCATTAGGATGTTAGCCACGCATGGCACCATTCCTCCTAAGTTTCGAGCTGGACTCAGTGGGTATACTCTCTGGCTGTTCTAGCC	TCCCATGGGCAGTATCGCTTTGAGCTTACACTCGGACCTCGTCGACATGCATTAGGATGTTAGCCACGCATGGCACCATTCCTCCTAAGTTTCGAGCTGGACTCAGTGGGTATACTCTCTGGCTGTTCTAGCCTGTACTTTACA
ENST00000374736	ENSG00000165029	ABCA1	set16	ENSG00000165029	ABCA1	-46	7542	7568	27	ATGGATGTGTCACCGGGAAACCAGTCT	0.967849	-52.3785	0.518519	1	1	1	1	1	1	5	1	1	0	1	1	A1	TCCCATGGGCAGTATCGCTTTGAGC	2	1	A2	GGTATACTCTCTGGCTGTTCTAGCC	TCCCATGGGCAGTATCGCTTTGAGCTTACACTCGGACCTCGTCGACATGCATTATGGATGTGTCACCGGGAAACCAGTCTCCTCCTAAGTTTCGAGCTGGACTCAGTGGGTATACTCTCTGGCTGTTCTAGCC	TCCCATGGGCAGTATCGCTTTGAGCTTACACTCGGACCTCGTCGACATGCATTATGGATGTGTCACCGGGAAACCAGTCTCCTCCTAAGTTTCGAGCTGGACTCAGTGGGTATACTCTCTGGCTGTTCTAGCCAATAAAGCCTG
ENST00000374736	ENSG00000165029	ABCA1	set16	ENSG00000165029	ABCA1	-46	7442	7474	33	GCCATGATTACTTGATGAATTATTGTTGCAACC	0.927849	-53.2785	0.363636	1	1	1	1	1	1	5	1	1	0	1	1	A1	TCCCATGGGCAGTATCGCTTTGAGC	2	1	A2	GGTATACTCTCTGGCTGTTCTAGCC	TCCCATGGGCAGTATCGCTTTGAGCTTACACTCGGACCTCGTCGACATGCATTGCCATGATTACTTGATGAATTATTGTTGCAACCCCTCCTAAGTTTCGAGCTGGACTCAGTGGGTATACTCTCTGGCTGTTCTAGCC	TCCCATGGGCAGTATCGCTTTGAGCTTACACTCGGACCTCGTCGACATGCATTGCCATGATTACTTGATGAATTATTGTTGCAACCCCTCCTAAGTTTCGAGCTGGACTCAGTGGGTATACTCTCTGGCTGTTCTAGCCCTAGG
ENST00000374736	ENSG00000165029	ABCA1	set16	ENSG00000165029	ABCA1	-46	7370	7399	30	AGTTCAAACCCATATGTCCATTGGGTTCCA	0.932151	-53.6785	0.433333	1	1	1	1	1	1	5	1	1	0	1	1	A1	TCCCATGGGCAGTATCGCTTTGAGC	2	1	A2	GGTATACTCTCTGGCTGTTCTAGCC	TCCCATGGGCAGTATCGCTTTGAGCTTACACTCGGACCTCGTCGACATGCATTAGTTCAAACCCATATGTCCATTGGGTTCCACCTCCTAAGTTTCGAGCTGGACTCAGTGGGTATACTCTCTGGCTGTTCTAGCC	TCCCATGGGCAGTATCGCTTTGAGCTTACACTCGGACCTCGTCGACATGCATTAGTTCAAACCCATATGTCCATTGGGTTCCACCTCCTAAGTTTCGAGCTGGACTCAGTGGGTATACTCTCTGGCTGTTCTAGCCTAATATGT
ENST00000374736	ENSG00000165029	ABCA1	set16	ENSG00000165029	ABCA1	-46	7198	7230	33	AGTATCAGTACAGTATCCAGTTTACTTCTTCCC	0.872151	-56.0785	0.393939	1	1	1	1	1	1	5	1	1	0	1	1	A1	TCCCATGGGCAGTATCGCTTTGAGC	2	1	A2	GGTATACTCTCTGGCTGTTCTAGCC	TCCCATGGGCAGTATCGCTTTGAGCTTACACTCGGACCTCGTCGACATGCATTAGTATCAGTACAGTATCCAGTTTACTTCTTCCCCCTCCTAAGTTTCGAGCTGGACTCAGTGGGTATACTCTCTGGCTGTTCTAGCC	TCCCATGGGCAGTATCGCTTTGAGCTTACACTCGGACCTCGTCGACATGCATTAGTATCAGTACAGTATCCAGTTTACTTCTTCCCCCTCCTAAGTTTCGAGCTGGACTCAGTGGGTATACTCTCTGGCTGTTCTAGCCCTATG
ENST00000374736	ENSG00000165029	ABCA1	set16	ENSG00000165029	ABCA1	-46	7166	7196	31	CATCAACTTCTGGCTCTTTTCTCCACAACAC	0.922151	-54.8785	0.451613	1	1	1	1	1	1	5	1	1	0	1	1	A1	TCCCATGGGCAGTATCGCTTTGAGC	2	1	A2	GGTATACTCTCTGGCTGTTCTAGCC	TCCCATGGGCAGTATCGCTTTGAGCTTACACTCGGACCTCGTCGACATGCATTCATCAACTTCTGGCTCTTTTCTCCACAACACCCTCCTAAGTTTCGAGCTGGACTCAGTGGGTATACTCTCTGGCTGTTCTAGCC	TCCCATGGGCAGTATCGCTTTGAGCTTACACTCGGACCTCGTCGACATGCATTCATCAACTTCTGGCTCTTTTCTCCACAACACCCTCCTAAGTTTCGAGCTGGACTCAGTGGGTATACTCTCTGGCTGTTCTAGCCCTTCAAA
ENST00000374736	ENSG00000165029	ABCA1	set16	ENSG00000165029	ABCA1	-46	6908	6938	31	AAACAGAGTAGTCTTCTATGTGGAGTCGCTT	0.987849	-54.4785	0.419355	1	1	1	1	1	1	5	1	1	0	1	1	A1	TCCCATGGGCAGTATCGCTTTGAGC	2	1	A2	GGTATACTCTCTGGCTGTTCTAGCC	TCCCATGGGCAGTATCGCTTTGAGCTTACACTCGGACCTCGTCGACATGCATTAAACAGAGTAGTCTTCTATGTGGAGTCGCTTCCTCCTAAGTTTCGAGCTGGACTCAGTGGGTATACTCTCTGGCTGTTCTAGCC	TCCCATGGGCAGTATCGCTTTGAGCTTACACTCGGACCTCGTCGACATGCATTAAACAGAGTAGTCTTCTATGTGGAGTCGCTTCCTCCTAAGTTTCGAGCTGGACTCAGTGGGTATACTCTCTGGCTGTTCTAGCCTATGGGG
ENST00000374736	ENSG00000165029	ABCA1	set16	ENSG00000165029	ABCA1	-46	6690	6720	31	CCAAACCTATTTTTTAGATGCTGGACACTGC	0.897849	-52.6785	0.419355	1	1	1	1	1	1	5	1	1	0	1	1	A1	TCCCATGGGCAGTATCGCTTTGAGC	2	1	A2	GGTATACTCTCTGGCTGTTCTAGCC	TCCCATGGGCAGTATCGCTTTGAGCTTACACTCGGACCTCGTCGACATGCATTCCAAACCTATTTTTTAGATGCTGGACACTGCCCTCCTAAGTTTCGAGCTGGACTCAGTGGGTATACTCTCTGGCTGTTCTAGCC	TCCCATGGGCAGTATCGCTTTGAGCTTACACTCGGACCTCGTCGACATGCATTCCAAACCTATTTTTTAGATGCTGGACACTGCCCTCCTAAGTTTCGAGCTGGACTCAGTGGGTATACTCTCTGGCTGTTCTAGCCACGACAA
ENST00000374736	ENSG00000165029	ABCA1	set16	ENSG00000165029	ABCA1	-46	6539	6564	26	CACAAGAACCGCCGGGCTTTGGGATC	0.962151	-52.7785	0.615385	1	1	1	1	1	1	5	1	1	0	1	1	A1	TCCCATGGGCAGTATCGCTTTGAGC	2	1	A2	GGTATACTCTCTGGCTGTTCTAGCC	TCCCATGGGCAGTATCGCTTTGAGCTTACACTCGGACCTCGTCGACATGCATTCACAAGAACCGCCGGGCTTTGGGATCCCTCCTAAGTTTCGAGCTGGACTCAGTGGGTATACTCTCTGGCTGTTCTAGCC	TCCCATGGGCAGTATCGCTTTGAGCTTACACTCGGACCTCGTCGACATGCATTCACAAGAACCGCCGGGCTTTGGGATCCCTCCTAAGTTTCGAGCTGGACTCAGTGGGTATACTCTCTGGCTGTTCTAGCCTATATATACAAT
ENST00000374736	ENSG00000165029	ABCA1	set16	ENSG00000165029	ABCA1	-46	6511	6537	27	ATGCCTGTGGTGGGTTCATCCAGAAAC	0.947849	-52.0785	0.518519	1	1	1	1	1	1	5	1	1	0	1	1	A1	TCCCATGGGCAGTATCGCTTTGAGC	2	1	A2	GGTATACTCTCTGGCTGTTCTAGCC	TCCCATGGGCAGTATCGCTTTGAGCTTACACTCGGACCTCGTCGACATGCATTATGCCTGTGGTGGGTTCATCCAGAAACCCTCCTAAGTTTCGAGCTGGACTCAGTGGGTATACTCTCTGGCTGTTCTAGCC	TCCCATGGGCAGTATCGCTTTGAGCTTACACTCGGACCTCGTCGACATGCATTATGCCTGTGGTGGGTTCATCCAGAAACCCTCCTAAGTTTCGAGCTGGACTCAGTGGGTATACTCTCTGGCTGTTCTAGCCTTGTGGCGAGT
ENST00000374736	ENSG00000165029	ABCA1	set16	ENSG00000165029	ABCA1	-46	6421	6454	34	TCCACTATAGTTACCAGCATATTTTTCTCCATAC	0.952151	-55.1785	0.352941	1	1	1	1	1	1	5	1	1	0	1	1	A1	TCCCATGGGCAGTATCGCTTTGAGC	2	1	A2	GGTATACTCTCTGGCTGTTCTAGCC	TCCCATGGGCAGTATCGCTTTGAGCTTACACTCGGACCTCGTCGACATGCATTTCCACTATAGTTACCAGCATATTTTTCTCCATACCCTCCTAAGTTTCGAGCTGGACTCAGTGGGTATACTCTCTGGCTGTTCTAGCC	TCCCATGGGCAGTATCGCTTTGAGCTTACACTCGGACCTCGTCGACATGCATTTCCACTATAGTTACCAGCATATTTTTCTCCATACCCTCCTAAGTTTCGAGCTGGACTCAGTGGGTATACTCTCTGGCTGTTCTAGCCGTAT
ENST00000374736	ENSG00000165029	ABCA1	set16	ENSG00000165029	ABCA1	-46	6277	6302	26	TGGCATCAAACTGAGGGCAGTAGCCC	0.942151	-53.2785	0.576923	1	1	1	1	1	1	5	1	1	0	1	1	A1	TCCCATGGGCAGTATCGCTTTGAGC	2	1	A2	GGTATACTCTCTGGCTGTTCTAGCC	TCCCATGGGCAGTATCGCTTTGAGCTTACACTCGGACCTCGTCGACATGCATTTGGCATCAAACTGAGGGCAGTAGCCCCCTCCTAAGTTTCGAGCTGGACTCAGTGGGTATACTCTCTGGCTGTTCTAGCC	TCCCATGGGCAGTATCGCTTTGAGCTTACACTCGGACCTCGTCGACATGCATTTGGCATCAAACTGAGGGCAGTAGCCCCCTCCTAAGTTTCGAGCTGGACTCAGTGGGTATACTCTCTGGCTGTTCTAGCCAAGTGACGAAGC
ENST00000374736	ENSG00000165029	ABCA1	set16	ENSG00000165029	ABCA1	-46	6206	6239	34	TATTTTTGTTAAGGAAAGCATCTCCTCTGGTAAC	0.982151	-54.8785	0.352941	1	1	1	1	1	1	5	1	1	0	1	1	A1	TCCCATGGGCAGTATCGCTTTGAGC	2	1	A2	GGTATACTCTCTGGCTGTTCTAGCC	TCCCATGGGCAGTATCGCTTTGAGCTTACACTCGGACCTCGTCGACATGCATTTATTTTTGTTAAGGAAAGCATCTCCTCTGGTAACCCTCCTAAGTTTCGAGCTGGACTCAGTGGGTATACTCTCTGGCTGTTCTAGCC	TCCCATGGGCAGTATCGCTTTGAGCTTACACTCGGACCTCGTCGACATGCATTTATTTTTGTTAAGGAAAGCATCTCCTCTGGTAACCCTCCTAAGTTTCGAGCTGGACTCAGTGGGTATACTCTCTGGCTGTTCTAGCCGGTC
ENST00000374736	ENSG00000165029	ABCA1	set16	ENSG00000165029	ABCA1	-46	6172	6204	33	GTGGTATCTCCTGTTAACATCTTGAAAGTTGAT	0.957849	-54.0785	0.363636	1	1	1	1	1	1	5	1	1	0	1	1	A1	TCCCATGGGCAGTATCGCTTTGAGC	2	1	A2	GGTATACTCTCTGGCTGTTCTAGCC	TCCCATGGGCAGTATCGCTTTGAGCTTACACTCGGACCTCGTCGACATGCATTGTGGTATCTCCTGTTAACATCTTGAAAGTTGATCCTCCTAAGTTTCGAGCTGGACTCAGTGGGTATACTCTCTGGCTGTTCTAGCC	TCCCATGGGCAGTATCGCTTTGAGCTTACACTCGGACCTCGTCGACATGCATTGTGGTATCTCCTGTTAACATCTTGAAAGTTGATCCTCCTAAGTTTCGAGCTGGACTCAGTGGGTATACTCTCTGGCTGTTCTAGCCCGAGA
ENST00000374736	ENSG00000165029	ABCA1	set16	ENSG00000165029	ABCA1	-46	6021	6049	29	TAAGATGTCATTCTGGCCTCCACCATCAA	0.987849	-53.2785	0.448276	1	1	1	1	1	1	5	1	1	0	1	1	A1	TCCCATGGGCAGTATCGCTTTGAGC	2	1	A2	GGTATACTCTCTGGCTGTTCTAGCC	TCCCATGGGCAGTATCGCTTTGAGCTTACACTCGGACCTCGTCGACATGCATTTAAGATGTCATTCTGGCCTCCACCATCAACCTCCTAAGTTTCGAGCTGGACTCAGTGGGTATACTCTCTGGCTGTTCTAGCC	TCCCATGGGCAGTATCGCTTTGAGCTTACACTCGGACCTCGTCGACATGCATTTAAGATGTCATTCTGGCCTCCACCATCAACCTCCTAAGTTTCGAGCTGGACTCAGTGGGTATACTCTCTGGCTGTTCTAGCCAGTTGCTTG
ENST00000374736	ENSG00000165029	ABCA1	set16	ENSG00000165029	ABCA1	-46	5957	5988	32	TCTTCATCATTCAGAGGAGATAGCTTTGCATT	0.967849	-54.3785	0.375	1	1	1	1	1	1	5	1	1	0	1	1	A1	TCCCATGGGCAGTATCGCTTTGAGC	2	1	A2	GGTATACTCTCTGGCTGTTCTAGCC	TCCCATGGGCAGTATCGCTTTGAGCTTACACTCGGACCTCGTCGACATGCATTTCTTCATCATTCAGAGGAGATAGCTTTGCATTCCTCCTAAGTTTCGAGCTGGACTCAGTGGGTATACTCTCTGGCTGTTCTAGCC	TCCCATGGGCAGTATCGCTTTGAGCTTACACTCGGACCTCGTCGACATGCATTTCTTCATCATTCAGAGGAGATAGCTTTGCATTCCTCCTAAGTTTCGAGCTGGACTCAGTGGGTATACTCTCTGGCTGTTCTAGCCCGATAG
ENST00000374736	ENSG00000165029	ABCA1	set16	ENSG00000165029	ABCA1	-46	5928	5955	28	ACAGGTCTGGGCCTGATGAAGAATCTGT	0.932151	-54.0785	0.5	1	1	1	1	1	1	5	1	1	0	1	1	A1	TCCCATGGGCAGTATCGCTTTGAGC	2	1	A2	GGTATACTCTCTGGCTGTTCTAGCC	TCCCATGGGCAGTATCGCTTTGAGCTTACACTCGGACCTCGTCGACATGCATTACAGGTCTGGGCCTGATGAAGAATCTGTCCTCCTAAGTTTCGAGCTGGACTCAGTGGGTATACTCTCTGGCTGTTCTAGCC	TCCCATGGGCAGTATCGCTTTGAGCTTACACTCGGACCTCGTCGACATGCATTACAGGTCTGGGCCTGATGAAGAATCTGTCCTCCTAAGTTTCGAGCTGGACTCAGTGGGTATACTCTCTGGCTGTTCTAGCCGCGTTCTTCC
ENST00000374736	ENSG00000165029	ABCA1	set16	ENSG00000165029	ABCA1	-46	5484	5510	27	TGGAGGACACATAGGACTTCTGCTGGA	0.992151	-53.3785	0.518519	1	1	1	1	1	1	5	1	1	0	1	1	A1	TCCCATGGGCAGTATCGCTTTGAGC	2	1	A2	GGTATACTCTCTGGCTGTTCTAGCC	TCCCATGGGCAGTATCGCTTTGAGCTTACACTCGGACCTCGTCGACATGCATTTGGAGGACACATAGGACTTCTGCTGGACCTCCTAAGTTTCGAGCTGGACTCAGTGGGTATACTCTCTGGCTGTTCTAGCC	TCCCATGGGCAGTATCGCTTTGAGCTTACACTCGGACCTCGTCGACATGCATTTGGAGGACACATAGGACTTCTGCTGGACCTCCTAAGTTTCGAGCTGGACTCAGTGGGTATACTCTCTGGCTGTTCTAGCCATCTGCTATGG
ENST00000374736	ENSG00000165029	ABCA1	set16	ENSG00000165029	ABCA1	-46	5245	5271	27	ACTGATGTGGTCATCAGAGCCACCTCT	0.997849	-53.2785	0.518519	1	1	1	1	1	1	5	1	1	0	1	1	A1	TCCCATGGGCAGTATCGCTTTGAGC	2	1	A2	GGTATACTCTCTGGCTGTTCTAGCC	TCCCATGGGCAGTATCGCTTTGAGCTTACACTCGGACCTCGTCGACATGCATTACTGATGTGGTCATCAGAGCCACCTCTCCTCCTAAGTTTCGAGCTGGACTCAGTGGGTATACTCTCTGGCTGTTCTAGCC	TCCCATGGGCAGTATCGCTTTGAGCTTACACTCGGACCTCGTCGACATGCATTACTGATGTGGTCATCAGAGCCACCTCTCCTCCTAAGTTTCGAGCTGGACTCAGTGGGTATACTCTCTGGCTGTTCTAGCCGATTTGAATAT
ENST00000374736	ENSG00000165029	ABCA1	set16	ENSG00000165029	ABCA1	-46	4933	4962	30	TCTTGACTCGGAGGAAGTGCTTGAGTATTA	0.947849	-53.7785	0.433333	1	1	1	1	1	1	5	1	1	0	1	1	A1	TCCCATGGGCAGTATCGCTTTGAGC	2	1	A2	GGTATACTCTCTGGCTGTTCTAGCC	TCCCATGGGCAGTATCGCTTTGAGCTTACACTCGGACCTCGTCGACATGCATTTCTTGACTCGGAGGAAGTGCTTGAGTATTACCTCCTAAGTTTCGAGCTGGACTCAGTGGGTATACTCTCTGGCTGTTCTAGCC	TCCCATGGGCAGTATCGCTTTGAGCTTACACTCGGACCTCGTCGACATGCATTTCTTGACTCGGAGGAAGTGCTTGAGTATTACCTCCTAAGTTTCGAGCTGGACTCAGTGGGTATACTCTCTGGCTGTTCTAGCCATGAACAT
ENST00000374736	ENSG00000165029	ABCA1	set16	ENSG00000165029	ABCA1	-46	4872	4904	33	TAAACTCATTCACCCAGATCTTGTTCTTTAAGC	0.947849	-54.0785	0.363636	1	1	1	1	1	1	5	1	1	0	1	1	A1	TCCCATGGGCAGTATCGCTTTGAGC	2	1	A2	GGTATACTCTCTGGCTGTTCTAGCC	TCCCATGGGCAGTATCGCTTTGAGCTTACACTCGGACCTCGTCGACATGCATTTAAACTCATTCACCCAGATCTTGTTCTTTAAGCCCTCCTAAGTTTCGAGCTGGACTCAGTGGGTATACTCTCTGGCTGTTCTAGCC	TCCCATGGGCAGTATCGCTTTGAGCTTACACTCGGACCTCGTCGACATGCATTTAAACTCATTCACCCAGATCTTGTTCTTTAAGCCCTCCTAAGTTTCGAGCTGGACTCAGTGGGTATACTCTCTGGCTGTTCTAGCCCTATC
ENST00000374736	ENSG00000165029	ABCA1	set16	ENSG00000165029	ABCA1	-46	4808	4839	32	AGATAATCCGAAATGTTTCTTCCTGTCAGGTC	0.972151	-54.6785	0.40625	1	1	1	1	1	1	5	1	1	0	1	1	A1	TCCCATGGGCAGTATCGCTTTGAGC	2	1	A2	GGTATACTCTCTGGCTGTTCTAGCC	TCCCATGGGCAGTATCGCTTTGAGCTTACACTCGGACCTCGTCGACATGCATTAGATAATCCGAAATGTTTCTTCCTGTCAGGTCCCTCCTAAGTTTCGAGCTGGACTCAGTGGGTATACTCTCTGGCTGTTCTAGCC	TCCCATGGGCAGTATCGCTTTGAGCTTACACTCGGACCTCGTCGACATGCATTAGATAATCCGAAATGTTTCTTCCTGTCAGGTCCCTCCTAAGTTTCGAGCTGGACTCAGTGGGTATACTCTCTGGCTGTTCTAGCCTAAAAA
ENST00000374736	ENSG00000165029	ABCA1	set16	ENSG00000165029	ABCA1	-46	4548	4572	25	TCCATACAGCGGGTCCCGAAGCCAG	0.952151	-52.8785	0.64	1	1	1	1	1	1	5	1	1	0	1	1	A1	TCCCATGGGCAGTATCGCTTTGAGC	2	1	A2	GGTATACTCTCTGGCTGTTCTAGCC	TCCCATGGGCAGTATCGCTTTGAGCTTACACTCGGACCTCGTCGACATGCATTTCCATACAGCGGGTCCCGAAGCCAGCCTCCTAAGTTTCGAGCTGGACTCAGTGGGTATACTCTCTGGCTGTTCTAGCC	TCCCATGGGCAGTATCGCTTTGAGCTTACACTCGGACCTCGTCGACATGCATTTCCATACAGCGGGTCCCGAAGCCAGCCTCCTAAGTTTCGAGCTGGACTCAGTGGGTATACTCTCTGGCTGTTCTAGCCTAAGAATATATGA
ENST00000374736	ENSG00000165029	ABCA1	set16	ENSG00000165029	ABCA1	-46	4459	4489	31	GCTGACAAATGTGTACTGTTCGTTGTACATC	0.887849	-52.8785	0.419355	1	1	1	1	1	1	5	1	1	0	1	1	A1	TCCCATGGGCAGTATCGCTTTGAGC	2	1	A2	GGTATACTCTCTGGCTGTTCTAGCC	TCCCATGGGCAGTATCGCTTTGAGCTTACACTCGGACCTCGTCGACATGCATTGCTGACAAATGTGTACTGTTCGTTGTACATCCCTCCTAAGTTTCGAGCTGGACTCAGTGGGTATACTCTCTGGCTGTTCTAGCC	TCCCATGGGCAGTATCGCTTTGAGCTTACACTCGGACCTCGTCGACATGCATTGCTGACAAATGTGTACTGTTCGTTGTACATCCCTCCTAAGTTTCGAGCTGGACTCAGTGGGTATACTCTCTGGCTGTTCTAGCCCGCACGG
ENST00000374736	ENSG00000165029	ABCA1	set16	ENSG00000165029	ABCA1	-46	4407	4432	26	CTTGCCAAAGGGTGGCACGATCAGGC	0.912151	-53.3785	0.615385	1	1	1	1	1	1	5	1	1	0	1	1	A1	TCCCATGGGCAGTATCGCTTTGAGC	2	1	A2	GGTATACTCTCTGGCTGTTCTAGCC	TCCCATGGGCAGTATCGCTTTGAGCTTACACTCGGACCTCGTCGACATGCATTCTTGCCAAAGGGTGGCACGATCAGGCCCTCCTAAGTTTCGAGCTGGACTCAGTGGGTATACTCTCTGGCTGTTCTAGCC	TCCCATGGGCAGTATCGCTTTGAGCTTACACTCGGACCTCGTCGACATGCATTCTTGCCAAAGGGTGGCACGATCAGGCCCTCCTAAGTTTCGAGCTGGACTCAGTGGGTATACTCTCTGGCTGTTCTAGCCAAATAGGAATTT
ENST00000374736	ENSG00000165029	ABCA1	set16	ENSG00000165029	ABCA1	-46	3763	3793	31	CTGAGAAACACTGTCCTCCTTTTTCAGGTAT	0.947849	-53.5785	0.419355	1	1	1	1	1	1	5	1	1	0	1	1	A1	TCCCATGGGCAGTATCGCTTTGAGC	2	1	A2	GGTATACTCTCTGGCTGTTCTAGCC	TCCCATGGGCAGTATCGCTTTGAGCTTACACTCGGACCTCGTCGACATGCATTCTGAGAAACACTGTCCTCCTTTTTCAGGTATCCTCCTAAGTTTCGAGCTGGACTCAGTGGGTATACTCTCTGGCTGTTCTAGCC	TCCCATGGGCAGTATCGCTTTGAGCTTACACTCGGACCTCGTCGACATGCATTCTGAGAAACACTGTCCTCCTTTTTCAGGTATCCTCCTAAGTTTCGAGCTGGACTCAGTGGGTATACTCTCTGGCTGTTCTAGCCGATTACC
ENST00000374736	ENSG00000165029	ABCA1	set16	ENSG00000165029	ABCA1	-46	3733	3761	29	ACACAGTGCTACTACTGTTTCTGCAGGAA	0.917849	-52.9785	0.448276	1	1	1	1	1	1	5	1	1	0	1	1	A1	TCCCATGGGCAGTATCGCTTTGAGC	2	1	A2	GGTATACTCTCTGGCTGTTCTAGCC	TCCCATGGGCAGTATCGCTTTGAGCTTACACTCGGACCTCGTCGACATGCATTACACAGTGCTACTACTGTTTCTGCAGGAACCTCCTAAGTTTCGAGCTGGACTCAGTGGGTATACTCTCTGGCTGTTCTAGCC	TCCCATGGGCAGTATCGCTTTGAGCTTACACTCGGACCTCGTCGACATGCATTACACAGTGCTACTACTGTTTCTGCAGGAACCTCCTAAGTTTCGAGCTGGACTCAGTGGGTATACTCTCTGGCTGTTCTAGCCGAGAAAGGG
ENST00000374736	ENSG00000165029	ABCA1	set16	ENSG00000165029	ABCA1	-46	3649	3674	26	GGTTCTTCAGAAACAGGGAGGAGCCC	0.947849	-52.3785	0.576923	1	1	1	1	1	1	5	1	1	0	1	1	A1	TCCCATGGGCAGTATCGCTTTGAGC	2	1	A2	GGTATACTCTCTGGCTGTTCTAGCC	TCCCATGGGCAGTATCGCTTTGAGCTTACACTCGGACCTCGTCGACATGCATTGGTTCTTCAGAAACAGGGAGGAGCCCCCTCCTAAGTTTCGAGCTGGACTCAGTGGGTATACTCTCTGGCTGTTCTAGCC	TCCCATGGGCAGTATCGCTTTGAGCTTACACTCGGACCTCGTCGACATGCATTGGTTCTTCAGAAACAGGGAGGAGCCCCCTCCTAAGTTTCGAGCTGGACTCAGTGGGTATACTCTCTGGCTGTTCTAGCCTCCAGGTTCTCT
ENST00000374736	ENSG00000165029	ABCA1	set16	ENSG00000165029	ABCA1	-46	3622	3647	26	CACAGCACAGCTTCCCATGGGAGATG	0.917849	-51.7785	0.576923	1	1	1	1	1	1	5	1	1	0	1	1	A1	TCCCATGGGCAGTATCGCTTTGAGC	2	1	A2	GGTATACTCTCTGGCTGTTCTAGCC	TCCCATGGGCAGTATCGCTTTGAGCTTACACTCGGACCTCGTCGACATGCATTCACAGCACAGCTTCCCATGGGAGATGCCTCCTAAGTTTCGAGCTGGACTCAGTGGGTATACTCTCTGGCTGTTCTAGCC	TCCCATGGGCAGTATCGCTTTGAGCTTACACTCGGACCTCGTCGACATGCATTCACAGCACAGCTTCCCATGGGAGATGCCTCCTAAGTTTCGAGCTGGACTCAGTGGGTATACTCTCTGGCTGTTCTAGCCTTTGTGTGTAGT
ENST00000374736	ENSG00000165029	ABCA1	set16	ENSG00000165029	ABCA1	-46	3567	3595	29	CGCTTCATCCATGTGGTGTGTAGAGAGAA	0.987849	-53.5785	0.482759	1	1	1	1	1	1	5	1	1	0	1	1	A1	TCCCATGGGCAGTATCGCTTTGAGC	2	1	A2	GGTATACTCTCTGGCTGTTCTAGCC	TCCCATGGGCAGTATCGCTTTGAGCTTACACTCGGACCTCGTCGACATGCATTCGCTTCATCCATGTGGTGTGTAGAGAGAACCTCCTAAGTTTCGAGCTGGACTCAGTGGGTATACTCTCTGGCTGTTCTAGCC	TCCCATGGGCAGTATCGCTTTGAGCTTACACTCGGACCTCGTCGACATGCATTCGCTTCATCCATGTGGTGTGTAGAGAGAACCTCCTAAGTTTCGAGCTGGACTCAGTGGGTATACTCTCTGGCTGTTCTAGCCGTCGTTATA
ENST00000374736	ENSG00000165029	ABCA1	set16	ENSG00000165029	ABCA1	-46	3369	3398	30	TGCTTTTCAGCTTGCTTGATGGCAAACCAA	0.972151	-53.7785	0.433333	1	1	1	1	1	1	5	1	1	0	1	1	A1	TCCCATGGGCAGTATCGCTTTGAGC	2	1	A2	GGTATACTCTCTGGCTGTTCTAGCC	TCCCATGGGCAGTATCGCTTTGAGCTTACACTCGGACCTCGTCGACATGCATTTGCTTTTCAGCTTGCTTGATGGCAAACCAACCTCCTAAGTTTCGAGCTGGACTCAGTGGGTATACTCTCTGGCTGTTCTAGCC	TCCCATGGGCAGTATCGCTTTGAGCTTACACTCGGACCTCGTCGACATGCATTTGCTTTTCAGCTTGCTTGATGGCAAACCAACCTCCTAAGTTTCGAGCTGGACTCAGTGGGTATACTCTCTGGCTGTTCTAGCCGGAACGTC
ENST00000374736	ENSG00000165029	ABCA1	set16	ENSG00000165029	ABCA1	-46	3285	3313	29	CAAGCGGGCATAGAACCAGATGTGTTCTT	0.977849	-53.1785	0.482759	1	1	1	1	1	1	5	1	1	0	1	1	A1	TCCCATGGGCAGTATCGCTTTGAGC	2	1	A2	GGTATACTCTCTGGCTGTTCTAGCC	TCCCATGGGCAGTATCGCTTTGAGCTTACACTCGGACCTCGTCGACATGCATTCAAGCGGGCATAGAACCAGATGTGTTCTTCCTCCTAAGTTTCGAGCTGGACTCAGTGGGTATACTCTCTGGCTGTTCTAGCC	TCCCATGGGCAGTATCGCTTTGAGCTTACACTCGGACCTCGTCGACATGCATTCAAGCGGGCATAGAACCAGATGTGTTCTTCCTCCTAAGTTTCGAGCTGGACTCAGTGGGTATACTCTCTGGCTGTTCTAGCCGCCAGCAGC
ENST00000374736	ENSG00000165029	ABCA1	set16	ENSG00000165029	ABCA1	-46	3039	3065	27	CATCGACAGCCACCTTCATCCCATCTC	0.977849	-52.8785	0.555556	1	1	1	1	1	1	5	1	1	0	1	1	A1	TCCCATGGGCAGTATCGCTTTGAGC	2	1	A2	GGTATACTCTCTGGCTGTTCTAGCC	TCCCATGGGCAGTATCGCTTTGAGCTTACACTCGGACCTCGTCGACATGCATTCATCGACAGCCACCTTCATCCCATCTCCCTCCTAAGTTTCGAGCTGGACTCAGTGGGTATACTCTCTGGCTGTTCTAGCC	TCCCATGGGCAGTATCGCTTTGAGCTTACACTCGGACCTCGTCGACATGCATTCATCGACAGCCACCTTCATCCCATCTCCCTCCTAAGTTTCGAGCTGGACTCAGTGGGTATACTCTCTGGCTGTTCTAGCCGCGAACGGAAA
ENST00000374736	ENSG00000165029	ABCA1	set16	ENSG00000165029	ABCA1	-46	3007	3037	31	GTAGACTTTTACCAGGTTCTGAATGGACACG	0.972151	-54.2785	0.451613	1	1	1	1	1	1	5	1	1	0	1	1	A1	TCCCATGGGCAGTATCGCTTTGAGC	2	1	A2	GGTATACTCTCTGGCTGTTCTAGCC	TCCCATGGGCAGTATCGCTTTGAGCTTACACTCGGACCTCGTCGACATGCATTGTAGACTTTTACCAGGTTCTGAATGGACACGCCTCCTAAGTTTCGAGCTGGACTCAGTGGGTATACTCTCTGGCTGTTCTAGCC	TCCCATGGGCAGTATCGCTTTGAGCTTACACTCGGACCTCGTCGACATGCATTGTAGACTTTTACCAGGTTCTGAATGGACACGCCTCCTAAGTTTCGAGCTGGACTCAGTGGGTATACTCTCTGGCTGTTCTAGCCAGGGATC
ENST00000374736	ENSG00000165029	ABCA1	set16	ENSG00000165029	ABCA1	-46	2747	2774	28	GATTGAAGCCATCTTCCTCCACAGGACT	0.987849	-53.3785	0.5	1	1	1	1	1	1	5	1	1	0	1	1	A1	TCCCATGGGCAGTATCGCTTTGAGC	2	1	A2	GGTATACTCTCTGGCTGTTCTAGCC	TCCCATGGGCAGTATCGCTTTGAGCTTACACTCGGACCTCGTCGACATGCATTGATTGAAGCCATCTTCCTCCACAGGACTCCTCCTAAGTTTCGAGCTGGACTCAGTGGGTATACTCTCTGGCTGTTCTAGCC	TCCCATGGGCAGTATCGCTTTGAGCTTACACTCGGACCTCGTCGACATGCATTGATTGAAGCCATCTTCCTCCACAGGACTCCTCCTAAGTTTCGAGCTGGACTCAGTGGGTATACTCTCTGGCTGTTCTAGCCGCCCGTGCAC
ENST00000374736	ENSG00000165029	ABCA1	set16	ENSG00000165029	ABCA1	-46	2719	2745	27	TCAAACAGGTTGTCCCACTGCACTCCA	0.982151	-52.9785	0.518519	1	1	1	1	1	1	5	1	1	0	1	1	A1	TCCCATGGGCAGTATCGCTTTGAGC	2	1	A2	GGTATACTCTCTGGCTGTTCTAGCC	TCCCATGGGCAGTATCGCTTTGAGCTTACACTCGGACCTCGTCGACATGCATTTCAAACAGGTTGTCCCACTGCACTCCACCTCCTAAGTTTCGAGCTGGACTCAGTGGGTATACTCTCTGGCTGTTCTAGCC	TCCCATGGGCAGTATCGCTTTGAGCTTACACTCGGACCTCGTCGACATGCATTTCAAACAGGTTGTCCCACTGCACTCCACCTCCTAAGTTTCGAGCTGGACTCAGTGGGTATACTCTCTGGCTGTTCTAGCCCATAGACCACC
ENST00000374736	ENSG00000165029	ABCA1	set16	ENSG00000165029	ABCA1	-46	2497	2525	29	TGCTAATCAGGAAGCACTGCAGGATTGTC	0.932151	-54.4785	0.482759	1	1	1	1	1	1	5	1	1	0	1	1	A1	TCCCATGGGCAGTATCGCTTTGAGC	2	1	A2	GGTATACTCTCTGGCTGTTCTAGCC	TCCCATGGGCAGTATCGCTTTGAGCTTACACTCGGACCTCGTCGACATGCATTTGCTAATCAGGAAGCACTGCAGGATTGTCCCTCCTAAGTTTCGAGCTGGACTCAGTGGGTATACTCTCTGGCTGTTCTAGCC	TCCCATGGGCAGTATCGCTTTGAGCTTACACTCGGACCTCGTCGACATGCATTTGCTAATCAGGAAGCACTGCAGGATTGTCCCTCCTAAGTTTCGAGCTGGACTCAGTGGGTATACTCTCTGGCTGTTCTAGCCTTTATGTCA
ENST00000374736	ENSG00000165029	ABCA1	set16	ENSG00000165029	ABCA1	-46	2410	2439	30	AGGTTTCCTAACTTCAGGATGACCACTAGC	0.892151	-55.0785	0.466667	1	1	1	1	1	1	5	1	1	0	1	1	A1	TCCCATGGGCAGTATCGCTTTGAGC	2	1	A2	GGTATACTCTCTGGCTGTTCTAGCC	TCCCATGGGCAGTATCGCTTTGAGCTTACACTCGGACCTCGTCGACATGCATTAGGTTTCCTAACTTCAGGATGACCACTAGCCCTCCTAAGTTTCGAGCTGGACTCAGTGGGTATACTCTCTGGCTGTTCTAGCC	TCCCATGGGCAGTATCGCTTTGAGCTTACACTCGGACCTCGTCGACATGCATTAGGTTTCCTAACTTCAGGATGACCACTAGCCCTCCTAAGTTTCGAGCTGGACTCAGTGGGTATACTCTCTGGCTGTTCTAGCCAGGGAAGC
ENST00000374736	ENSG00000165029	ABCA1	set16	ENSG00000165029	ABCA1	-46	2266	2292	27	ACGATGCCCTTGATGATCACAGCCACT	0.967849	-52.6785	0.518519	1	1	1	1	1	1	5	1	1	0	1	1	A1	TCCCATGGGCAGTATCGCTTTGAGC	2	1	A2	GGTATACTCTCTGGCTGTTCTAGCC	TCCCATGGGCAGTATCGCTTTGAGCTTACACTCGGACCTCGTCGACATGCATTACGATGCCCTTGATGATCACAGCCACTCCTCCTAAGTTTCGAGCTGGACTCAGTGGGTATACTCTCTGGCTGTTCTAGCC	TCCCATGGGCAGTATCGCTTTGAGCTTACACTCGGACCTCGTCGACATGCATTACGATGCCCTTGATGATCACAGCCACTCCTCCTAAGTTTCGAGCTGGACTCAGTGGGTATACTCTCTGGCTGTTCTAGCCCGCAGAGTTAC
ENST00000374736	ENSG00000165029	ABCA1	set16	ENSG00000165029	ABCA1	-46	2042	2066	25	CCTCAAAGGGGTCAGCTCGAGGACC	0.987849	-52.5785	0.64	1	1	1	1	1	1	5	1	1	0	1	1	A1	TCCCATGGGCAGTATCGCTTTGAGC	2	1	A2	GGTATACTCTCTGGCTGTTCTAGCC	TCCCATGGGCAGTATCGCTTTGAGCTTACACTCGGACCTCGTCGACATGCATTCCTCAAAGGGGTCAGCTCGAGGACCCCTCCTAAGTTTCGAGCTGGACTCAGTGGGTATACTCTCTGGCTGTTCTAGCC	TCCCATGGGCAGTATCGCTTTGAGCTTACACTCGGACCTCGTCGACATGCATTCCTCAAAGGGGTCAGCTCGAGGACCCCTCCTAAGTTTCGAGCTGGACTCAGTGGGTATACTCTCTGGCTGTTCTAGCCGACCCCACTGAAC
ENST00000374736	ENSG00000165029	ABCA1	set16	ENSG00000165029	ABCA1	-46	1922	1950	29	ATGCTGCCTGGAGTAATTCCAGTGAACAC	0.932151	-54.1785	0.482759	1	1	1	1	1	1	5	1	1	0	1	1	A1	TCCCATGGGCAGTATCGCTTTGAGC	2	1	A2	GGTATACTCTCTGGCTGTTCTAGCC	TCCCATGGGCAGTATCGCTTTGAGCTTACACTCGGACCTCGTCGACATGCATTATGCTGCCTGGAGTAATTCCAGTGAACACCCTCCTAAGTTTCGAGCTGGACTCAGTGGGTATACTCTCTGGCTGTTCTAGCC	TCCCATGGGCAGTATCGCTTTGAGCTTACACTCGGACCTCGTCGACATGCATTATGCTGCCTGGAGTAATTCCAGTGAACACCCTCCTAAGTTTCGAGCTGGACTCAGTGGGTATACTCTCTGGCTGTTCTAGCCACCGAGCAC
ENST00000374736	ENSG00000165029	ABCA1	set16	ENSG00000165029	ABCA1	-46	1517	1542	26	TGGAACACAGCCAGTTCCTGGAAGGT	0.927849	-51.8785	0.538462	1	1	1	1	1	1	5	1	1	0	1	1	A1	TCCCATGGGCAGTATCGCTTTGAGC	2	1	A2	GGTATACTCTCTGGCTGTTCTAGCC	TCCCATGGGCAGTATCGCTTTGAGCTTACACTCGGACCTCGTCGACATGCATTTGGAACACAGCCAGTTCCTGGAAGGTCCTCCTAAGTTTCGAGCTGGACTCAGTGGGTATACTCTCTGGCTGTTCTAGCC	TCCCATGGGCAGTATCGCTTTGAGCTTACACTCGGACCTCGTCGACATGCATTTGGAACACAGCCAGTTCCTGGAAGGTCCTCCTAAGTTTCGAGCTGGACTCAGTGGGTATACTCTCTGGCTGTTCTAGCCGGATTAGTACCG
ENST00000374736	ENSG00000165029	ABCA1	set16	ENSG00000165029	ABCA1	-46	1461	1487	27	TGGCTGGAGTGTCAGGTGTATACAGGA	0.982151	-53.2785	0.518519	1	1	1	1	1	1	5	1	1	0	1	1	A1	TCCCATGGGCAGTATCGCTTTGAGC	2	1	A2	GGTATACTCTCTGGCTGTTCTAGCC	TCCCATGGGCAGTATCGCTTTGAGCTTACACTCGGACCTCGTCGACATGCATTTGGCTGGAGTGTCAGGTGTATACAGGACCTCCTAAGTTTCGAGCTGGACTCAGTGGGTATACTCTCTGGCTGTTCTAGCC	TCCCATGGGCAGTATCGCTTTGAGCTTACACTCGGACCTCGTCGACATGCATTTGGCTGGAGTGTCAGGTGTATACAGGACCTCCTAAGTTTCGAGCTGGACTCAGTGGGTATACTCTCTGGCTGTTCTAGCCATACACGCGTT
ENST00000374736	ENSG00000165029	ABCA1	set16	ENSG00000165029	ABCA1	-46	1335	1366	32	TGTAGAGTTGTCATAGAAGGTTTCAGCATCTT	0.947849	-54.0785	0.375	1	1	1	1	1	1	5	1	1	0	1	1	A1	TCCCATGGGCAGTATCGCTTTGAGC	2	1	A2	GGTATACTCTCTGGCTGTTCTAGCC	TCCCATGGGCAGTATCGCTTTGAGCTTACACTCGGACCTCGTCGACATGCATTTGTAGAGTTGTCATAGAAGGTTTCAGCATCTTCCTCCTAAGTTTCGAGCTGGACTCAGTGGGTATACTCTCTGGCTGTTCTAGCC	TCCCATGGGCAGTATCGCTTTGAGCTTACACTCGGACCTCGTCGACATGCATTTGTAGAGTTGTCATAGAAGGTTTCAGCATCTTCCTCCTAAGTTTCGAGCTGGACTCAGTGGGTATACTCTCTGGCTGTTCTAGCCTTGGCG
ENST00000374736	ENSG00000165029	ABCA1	set16	ENSG00000165029	ABCA1	-46	1308	1333	26	CTCAGTGCCATTGCCTCCAAAGAGGG	0.897849	-51.5785	0.576923	1	1	1	1	1	1	5	1	1	0	1	1	A1	TCCCATGGGCAGTATCGCTTTGAGC	2	1	A2	GGTATACTCTCTGGCTGTTCTAGCC	TCCCATGGGCAGTATCGCTTTGAGCTTACACTCGGACCTCGTCGACATGCATTCTCAGTGCCATTGCCTCCAAAGAGGGCCTCCTAAGTTTCGAGCTGGACTCAGTGGGTATACTCTCTGGCTGTTCTAGCC	TCCCATGGGCAGTATCGCTTTGAGCTTACACTCGGACCTCGTCGACATGCATTCTCAGTGCCATTGCCTCCAAAGAGGGCCTCCTAAGTTTCGAGCTGGACTCAGTGGGTATACTCTCTGGCTGTTCTAGCCGGAAAGCTTTTT
ENST00000374736	ENSG00000165029	ABCA1	set16	ENSG00000165029	ABCA1	-46	1162	1191	30	CTGTTCACATTGGTCAGAAACATCACCTCC	0.962151	-53.9785	0.466667	1	1	1	1	1	1	5	1	1	0	1	1	A1	TCCCATGGGCAGTATCGCTTTGAGC	2	1	A2	GGTATACTCTCTGGCTGTTCTAGCC	TCCCATGGGCAGTATCGCTTTGAGCTTACACTCGGACCTCGTCGACATGCATTCTGTTCACATTGGTCAGAAACATCACCTCCCCTCCTAAGTTTCGAGCTGGACTCAGTGGGTATACTCTCTGGCTGTTCTAGCC	TCCCATGGGCAGTATCGCTTTGAGCTTACACTCGGACCTCGTCGACATGCATTCTGTTCACATTGGTCAGAAACATCACCTCCCCTCCTAAGTTTCGAGCTGGACTCAGTGGGTATACTCTCTGGCTGTTCTAGCCGGCATACG
ENST00000374736	ENSG00000165029	ABCA1	set16	ENSG00000165029	ABCA1	-46	1077	1107	31	AGACTATGCAGCAATGTTTTTGTGGCTTCAG	0.967849	-53.5785	0.419355	1	1	1	1	1	1	5	1	1	0	1	1	A1	TCCCATGGGCAGTATCGCTTTGAGC	2	1	A2	GGTATACTCTCTGGCTGTTCTAGCC	TCCCATGGGCAGTATCGCTTTGAGCTTACACTCGGACCTCGTCGACATGCATTAGACTATGCAGCAATGTTTTTGTGGCTTCAGCCTCCTAAGTTTCGAGCTGGACTCAGTGGGTATACTCTCTGGCTGTTCTAGCC	TCCCATGGGCAGTATCGCTTTGAGCTTACACTCGGACCTCGTCGACATGCATTAGACTATGCAGCAATGTTTTTGTGGCTTCAGCCTCCTAAGTTTCGAGCTGGACTCAGTGGGTATACTCTCTGGCTGTTCTAGCCCCGATTC
ENST00000374736	ENSG00000165029	ABCA1	set16	ENSG00000165029	ABCA1	-46	989	1017	29	ATGTCCATGTTGGAACGAAGTACTCGCTC	0.957849	-53.2785	0.482759	1	1	1	1	1	1	5	1	1	0	1	1	A1	TCCCATGGGCAGTATCGCTTTGAGC	2	1	A2	GGTATACTCTCTGGCTGTTCTAGCC	TCCCATGGGCAGTATCGCTTTGAGCTTACACTCGGACCTCGTCGACATGCATTATGTCCATGTTGGAACGAAGTACTCGCTCCCTCCTAAGTTTCGAGCTGGACTCAGTGGGTATACTCTCTGGCTGTTCTAGCC	TCCCATGGGCAGTATCGCTTTGAGCTTACACTCGGACCTCGTCGACATGCATTATGTCCATGTTGGAACGAAGTACTCGCTCCCTCCTAAGTTTCGAGCTGGACTCAGTGGGTATACTCTCTGGCTGTTCTAGCCAGTGTCGCA
ENST00000374736	ENSG00000165029	ABCA1	set16	ENSG00000165029	ABCA1	-46	865	895	31	CAGACTTGTCAAATGTAACTGGTAGCCTTGC	0.922151	-54.7785	0.451613	1	1	1	1	1	1	5	1	1	0	1	1	A1	TCCCATGGGCAGTATCGCTTTGAGC	2	1	A2	GGTATACTCTCTGGCTGTTCTAGCC	TCCCATGGGCAGTATCGCTTTGAGCTTACACTCGGACCTCGTCGACATGCATTCAGACTTGTCAAATGTAACTGGTAGCCTTGCCCTCCTAAGTTTCGAGCTGGACTCAGTGGGTATACTCTCTGGCTGTTCTAGCC	TCCCATGGGCAGTATCGCTTTGAGCTTACACTCGGACCTCGTCGACATGCATTCAGACTTGTCAAATGTAACTGGTAGCCTTGCCCTCCTAAGTTTCGAGCTGGACTCAGTGGGTATACTCTCTGGCTGTTCTAGCCATTGAGG
ENST00000374736	ENSG00000165029	ABCA1	set16	ENSG00000165029	ABCA1	-46	804	832	29	CAGCATCTTGTCCACAGTAGACTTTGGGA	0.972151	-53.8785	0.482759	1	1	1	1	1	1	5	1	1	0	1	1	A1	TCCCATGGGCAGTATCGCTTTGAGC	2	1	A2	GGTATACTCTCTGGCTGTTCTAGCC	TCCCATGGGCAGTATCGCTTTGAGCTTACACTCGGACCTCGTCGACATGCATTCAGCATCTTGTCCACAGTAGACTTTGGGACCTCCTAAGTTTCGAGCTGGACTCAGTGGGTATACTCTCTGGCTGTTCTAGCC	TCCCATGGGCAGTATCGCTTTGAGCTTACACTCGGACCTCGTCGACATGCATTCAGCATCTTGTCCACAGTAGACTTTGGGACCTCCTAAGTTTCGAGCTGGACTCAGTGGGTATACTCTCTGGCTGTTCTAGCCGTCGTACTT
ENST00000374736	ENSG00000165029	ABCA1	set16	ENSG00000165029	ABCA1	-46	678	708	31	AATGTTCTCAGAACTTTGCGCATGTCCTTCA	0.962151	-54.4785	0.419355	1	1	1	1	1	1	5	1	1	0	1	1	A1	TCCCATGGGCAGTATCGCTTTGAGC	2	1	A2	GGTATACTCTCTGGCTGTTCTAGCC	TCCCATGGGCAGTATCGCTTTGAGCTTACACTCGGACCTCGTCGACATGCATTAATGTTCTCAGAACTTTGCGCATGTCCTTCACCTCCTAAGTTTCGAGCTGGACTCAGTGGGTATACTCTCTGGCTGTTCTAGCC	TCCCATGGGCAGTATCGCTTTGAGCTTACACTCGGACCTCGTCGACATGCATTAATGTTCTCAGAACTTTGCGCATGTCCTTCACCTCCTAAGTTTCGAGCTGGACTCAGTGGGTATACTCTCTGGCTGTTCTAGCCCCCCGCC
ENST00000374736	ENSG00000165029	ABCA1	set16	ENSG00000165029	ABCA1	-46	619	644	26	TCCGAGCATCTGAGAACAGGCGAGCC	0.872151	-54.6785	0.615385	1	1	1	1	1	1	5	1	1	0	1	1	A1	TCCCATGGGCAGTATCGCTTTGAGC	2	1	A2	GGTATACTCTCTGGCTGTTCTAGCC	TCCCATGGGCAGTATCGCTTTGAGCTTACACTCGGACCTCGTCGACATGCATTTCCGAGCATCTGAGAACAGGCGAGCCCCTCCTAAGTTTCGAGCTGGACTCAGTGGGTATACTCTCTGGCTGTTCTAGCC	TCCCATGGGCAGTATCGCTTTGAGCTTACACTCGGACCTCGTCGACATGCATTTCCGAGCATCTGAGAACAGGCGAGCCCCTCCTAAGTTTCGAGCTGGACTCAGTGGGTATACTCTCTGGCTGTTCTAGCCAGTTTTGTACTC
ENST00000374736	ENSG00000165029	ABCA1	set16	ENSG00000165029	ABCA1	-46	437	463	27	TTCATAGGGTGGGTAGCTCAGCCGAAC	0.932151	-53.7785	0.555556	1	1	1	1	1	1	5	1	1	0	1	1	A1	TCCCATGGGCAGTATCGCTTTGAGC	2	1	A2	GGTATACTCTCTGGCTGTTCTAGCC	TCCCATGGGCAGTATCGCTTTGAGCTTACACTCGGACCTCGTCGACATGCATTTTCATAGGGTGGGTAGCTCAGCCGAACCCTCCTAAGTTTCGAGCTGGACTCAGTGGGTATACTCTCTGGCTGTTCTAGCC	TCCCATGGGCAGTATCGCTTTGAGCTTACACTCGGACCTCGTCGACATGCATTTTCATAGGGTGGGTAGCTCAGCCGAACCCTCCTAAGTTTCGAGCTGGACTCAGTGGGTATACTCTCTGGCTGTTCTAGCCCACCGACCGAG
ENST00000374736	ENSG00000165029	ABCA1	set16	ENSG00000165029	ABCA1	-46	379	403	25	GGCCACTTCCAGCAGCAGCTGACAT	0.967849	-52.3785	0.6	1	1	1	1	1	1	5	1	1	0	1	1	A1	TCCCATGGGCAGTATCGCTTTGAGC	2	1	A2	GGTATACTCTCTGGCTGTTCTAGCC	TCCCATGGGCAGTATCGCTTTGAGCTTACACTCGGACCTCGTCGACATGCATTGGCCACTTCCAGCAGCAGCTGACATCCTCCTAAGTTTCGAGCTGGACTCAGTGGGTATACTCTCTGGCTGTTCTAGCC	TCCCATGGGCAGTATCGCTTTGAGCTTACACTCGGACCTCGTCGACATGCATTGGCCACTTCCAGCAGCAGCTGACATCCTCCTAAGTTTCGAGCTGGACTCAGTGGGTATACTCTCTGGCTGTTCTAGCCGTTCTCACAACCC
ENST00000374736	ENSG00000165029	ABCA1	set16	ENSG00000165029	ABCA1	-46	9664	9696	33	ACAGTTGTTAATAAGTTTTCTGAGGTGTCCCAA	0.972151	-54.4785	0.363636	1	1	1	1	1	1	5	1	1	0	1	1	A1	TCCCATGGGCAGTATCGCTTTGAGC	2	1	A2	GGTATACTCTCTGGCTGTTCTAGCC	TCCCATGGGCAGTATCGCTTTGAGCTTACACTCGGACCTCGTCGACATGCATTACAGTTGTTAATAAGTTTTCTGAGGTGTCCCAACCTCCTAAGTTTCGAGCTGGACTCAGTGGGTATACTCTCTGGCTGTTCTAGCC	TCCCATGGGCAGTATCGCTTTGAGCTTACACTCGGACCTCGTCGACATGCATTACAGTTGTTAATAAGTTTTCTGAGGTGTCCCAACCTCCTAAGTTTCGAGCTGGACTCAGTGGGTATACTCTCTGGCTGTTCTAGCCCCTAT
ENST00000374736	ENSG00000165029	ABCA1	set16	ENSG00000165029	ABCA1	-46	5990	6019	30	AATTCTCTGTCTTTCCCGCCTCACATCTTC	0.932151	-54.7785	0.466667	1	1	1	0	1	1	4	1	1	0	1	1	A1	TCCCATGGGCAGTATCGCTTTGAGC	2	1	A2	GGTATACTCTCTGGCTGTTCTAGCC	TCCCATGGGCAGTATCGCTTTGAGCTTACACTCGGACCTCGTCGACATGCATTAATTCTCTGTCTTTCCCGCCTCACATCTTCCCTCCTAAGTTTCGAGCTGGACTCAGTGGGTATACTCTCTGGCTGTTCTAGCC	TCCCATGGGCAGTATCGCTTTGAGCTTACACTCGGACCTCGTCGACATGCATTAATTCTCTGTCTTTCCCGCCTCACATCTTCCCTCCTAAGTTTCGAGCTGGACTCAGTGGGTATACTCTCTGGCTGTTCTAGCCTAAGCAGC
ENST00000374736	ENSG00000165029	ABCA1	set16	ENSG00000165029	ABCA1	-46	5841	5869	29	GTTTCGTCCCACCAAGTCCCAAGATAATG	0.917849	-52.2785	0.482759	1	1	1	1	1	0	4	1	1	0	1	1	A1	TCCCATGGGCAGTATCGCTTTGAGC	2	1	A2	GGTATACTCTCTGGCTGTTCTAGCC	TCCCATGGGCAGTATCGCTTTGAGCTTACACTCGGACCTCGTCGACATGCATTGTTTCGTCCCACCAAGTCCCAAGATAATGCCTCCTAAGTTTCGAGCTGGACTCAGTGGGTATACTCTCTGGCTGTTCTAGCC	TCCCATGGGCAGTATCGCTTTGAGCTTACACTCGGACCTCGTCGACATGCATTGTTTCGTCCCACCAAGTCCCAAGATAATGCCTCCTAAGTTTCGAGCTGGACTCAGTGGGTATACTCTCTGGCTGTTCTAGCCAAACGCCCC
ENST00000502732	ENSG00000143322	ABL2	set16	ENSG00000143322	ABL2	-46	2074	2104	31	TGGTGCTAAACTGGAAGCAGAATTTTCTGTG	0.967849	-53.5785	0.419355	1	1	1	1	1	1	5	1	1	0	3	1	A3	ATGTGGCTGGCCGTTCCTTGTAGAC	4	1	A4	AGAGTTTTCCGGCGCCAGTGTTGTT	ATGTGGCTGGCCGTTCCTTGTAGACTTACACTCGGACCTCGTCGACATGCATTTGGTGCTAAACTGGAAGCAGAATTTTCTGTGCCTCCTAAGTTTCGAGCTGGACTCAGTGAGAGTTTTCCGGCGCCAGTGTTGTT	ATGTGGCTGGCCGTTCCTTGTAGACTTACACTCGGACCTCGTCGACATGCATTTGGTGCTAAACTGGAAGCAGAATTTTCTGTGCCTCCTAAGTTTCGAGCTGGACTCAGTGAGAGTTTTCCGGCGCCAGTGTTGTTATGGTAA
ENST00000502732	ENSG00000143322	ABL2	set16	ENSG00000143322	ABL2	-46	3117	3143	27	CCTGAGAGTCTGTGCCAATGAGCTGCA	0.922151	-54.1785	0.555556	1	1	1	1	1	1	5	1	1	0	3	1	A3	ATGTGGCTGGCCGTTCCTTGTAGAC	4	1	A4	AGAGTTTTCCGGCGCCAGTGTTGTT	ATGTGGCTGGCCGTTCCTTGTAGACTTACACTCGGACCTCGTCGACATGCATTCCTGAGAGTCTGTGCCAATGAGCTGCACCTCCTAAGTTTCGAGCTGGACTCAGTGAGAGTTTTCCGGCGCCAGTGTTGTT	ATGTGGCTGGCCGTTCCTTGTAGACTTACACTCGGACCTCGTCGACATGCATTCCTGAGAGTCTGTGCCAATGAGCTGCACCTCCTAAGTTTCGAGCTGGACTCAGTGAGAGTTTTCCGGCGCCAGTGTTGTTTCTGCTTGTCT
ENST00000502732	ENSG00000143322	ABL2	set16	ENSG00000143322	ABL2	-46	2527	2559	33	GTCTTTTTGATTAAGCGTGGTGTAAAGAAGCCT	0.932151	-55.1785	0.393939	1	1	1	1	1	1	5	1	1	0	3	1	A3	ATGTGGCTGGCCGTTCCTTGTAGAC	4	1	A4	AGAGTTTTCCGGCGCCAGTGTTGTT	ATGTGGCTGGCCGTTCCTTGTAGACTTACACTCGGACCTCGTCGACATGCATTGTCTTTTTGATTAAGCGTGGTGTAAAGAAGCCTCCTCCTAAGTTTCGAGCTGGACTCAGTGAGAGTTTTCCGGCGCCAGTGTTGTT	ATGTGGCTGGCCGTTCCTTGTAGACTTACACTCGGACCTCGTCGACATGCATTGTCTTTTTGATTAAGCGTGGTGTAAAGAAGCCTCCTCCTAAGTTTCGAGCTGGACTCAGTGAGAGTTTTCCGGCGCCAGTGTTGTTACAGG
ENST00000502732	ENSG00000143322	ABL2	set16	ENSG00000143322	ABL2	-46	2106	2131	26	AGAGGCCTGTGCACCTCTGATGAACC	0.962151	-53.3785	0.576923	1	1	1	1	1	1	5	1	1	0	3	1	A3	ATGTGGCTGGCCGTTCCTTGTAGAC	4	1	A4	AGAGTTTTCCGGCGCCAGTGTTGTT	ATGTGGCTGGCCGTTCCTTGTAGACTTACACTCGGACCTCGTCGACATGCATTAGAGGCCTGTGCACCTCTGATGAACCCCTCCTAAGTTTCGAGCTGGACTCAGTGAGAGTTTTCCGGCGCCAGTGTTGTT	ATGTGGCTGGCCGTTCCTTGTAGACTTACACTCGGACCTCGTCGACATGCATTAGAGGCCTGTGCACCTCTGATGAACCCCTCCTAAGTTTCGAGCTGGACTCAGTGAGAGTTTTCCGGCGCCAGTGTTGTTCTTAGGCAATGC
ENST00000502732	ENSG00000143322	ABL2	set16	ENSG00000143322	ABL2	-46	1178	1205	28	TCTTCCAGACGCCAACGTAAACCTCTCC	0.932151	-54.1785	0.535714	1	1	1	1	1	1	5	1	1	0	3	1	A3	ATGTGGCTGGCCGTTCCTTGTAGAC	4	1	A4	AGAGTTTTCCGGCGCCAGTGTTGTT	ATGTGGCTGGCCGTTCCTTGTAGACTTACACTCGGACCTCGTCGACATGCATTTCTTCCAGACGCCAACGTAAACCTCTCCCCTCCTAAGTTTCGAGCTGGACTCAGTGAGAGTTTTCCGGCGCCAGTGTTGTT	ATGTGGCTGGCCGTTCCTTGTAGACTTACACTCGGACCTCGTCGACATGCATTTCTTCCAGACGCCAACGTAAACCTCTCCCCTCCTAAGTTTCGAGCTGGACTCAGTGAGAGTTTTCCGGCGCCAGTGTTGTTTTCTGGCGAC
ENST00000502732	ENSG00000143322	ABL2	set16	ENSG00000143322	ABL2	-46	1987	2013	27	TTGGAAGGAAGTATAGGTAGCCGGGGC	0.932151	-53.5785	0.555556	1	1	1	1	1	1	5	1	1	0	3	1	A3	ATGTGGCTGGCCGTTCCTTGTAGAC	4	1	A4	AGAGTTTTCCGGCGCCAGTGTTGTT	ATGTGGCTGGCCGTTCCTTGTAGACTTACACTCGGACCTCGTCGACATGCATTTTGGAAGGAAGTATAGGTAGCCGGGGCCCTCCTAAGTTTCGAGCTGGACTCAGTGAGAGTTTTCCGGCGCCAGTGTTGTT	ATGTGGCTGGCCGTTCCTTGTAGACTTACACTCGGACCTCGTCGACATGCATTTTGGAAGGAAGTATAGGTAGCCGGGGCCCTCCTAAGTTTCGAGCTGGACTCAGTGAGAGTTTTCCGGCGCCAGTGTTGTTGGGAGCGTAGA
ENST00000502732	ENSG00000143322	ABL2	set16	ENSG00000143322	ABL2	-46	1749	1779	31	TTTTCTAGTAGGTCATAGACCTGAGACAGGT	0.942151	-55.0785	0.419355	1	1	1	1	1	1	5	1	1	0	3	1	A3	ATGTGGCTGGCCGTTCCTTGTAGAC	4	1	A4	AGAGTTTTCCGGCGCCAGTGTTGTT	ATGTGGCTGGCCGTTCCTTGTAGACTTACACTCGGACCTCGTCGACATGCATTTTTTCTAGTAGGTCATAGACCTGAGACAGGTCCTCCTAAGTTTCGAGCTGGACTCAGTGAGAGTTTTCCGGCGCCAGTGTTGTT	ATGTGGCTGGCCGTTCCTTGTAGACTTACACTCGGACCTCGTCGACATGCATTTTTTCTAGTAGGTCATAGACCTGAGACAGGTCCTCCTAAGTTTCGAGCTGGACTCAGTGAGAGTTTTCCGGCGCCAGTGTTGTTCTTCTTT
ENST00000502732	ENSG00000143322	ABL2	set16	ENSG00000143322	ABL2	-46	1459	1491	33	TTCTTCTTCTCTAAGTACTCCATTGCAGAAGAA	0.997849	-55.1785	0.363636	1	1	1	1	1	1	5	1	1	0	3	1	A3	ATGTGGCTGGCCGTTCCTTGTAGAC	4	1	A4	AGAGTTTTCCGGCGCCAGTGTTGTT	ATGTGGCTGGCCGTTCCTTGTAGACTTACACTCGGACCTCGTCGACATGCATTTTCTTCTTCTCTAAGTACTCCATTGCAGAAGAACCTCCTAAGTTTCGAGCTGGACTCAGTGAGAGTTTTCCGGCGCCAGTGTTGTT	ATGTGGCTGGCCGTTCCTTGTAGACTTACACTCGGACCTCGTCGACATGCATTTTCTTCTTCTCTAAGTACTCCATTGCAGAAGAACCTCCTAAGTTTCGAGCTGGACTCAGTGAGAGTTTTCCGGCGCCAGTGTTGTTTGTGA
ENST00000502732	ENSG00000143322	ABL2	set16	ENSG00000143322	ABL2	-46	947	975	29	ACATACACCTTGCCATCTGCAGTGGTATT	0.967849	-52.8785	0.448276	1	1	1	1	1	1	5	1	1	0	3	1	A3	ATGTGGCTGGCCGTTCCTTGTAGAC	4	1	A4	AGAGTTTTCCGGCGCCAGTGTTGTT	ATGTGGCTGGCCGTTCCTTGTAGACTTACACTCGGACCTCGTCGACATGCATTACATACACCTTGCCATCTGCAGTGGTATTCCTCCTAAGTTTCGAGCTGGACTCAGTGAGAGTTTTCCGGCGCCAGTGTTGTT	ATGTGGCTGGCCGTTCCTTGTAGACTTACACTCGGACCTCGTCGACATGCATTACATACACCTTGCCATCTGCAGTGGTATTCCTCCTAAGTTTCGAGCTGGACTCAGTGAGAGTTTTCCGGCGCCAGTGTTGTTTACCTGTGC
ENST00000502732	ENSG00000143322	ABL2	set16	ENSG00000143322	ABL2	-46	1090	1115	26	CGTGGATGGGGGACACACCATAGACT	0.987849	-52.2785	0.576923	1	1	1	1	1	1	5	1	1	0	3	1	A3	ATGTGGCTGGCCGTTCCTTGTAGAC	4	1	A4	AGAGTTTTCCGGCGCCAGTGTTGTT	ATGTGGCTGGCCGTTCCTTGTAGACTTACACTCGGACCTCGTCGACATGCATTCGTGGATGGGGGACACACCATAGACTCCTCCTAAGTTTCGAGCTGGACTCAGTGAGAGTTTTCCGGCGCCAGTGTTGTT	ATGTGGCTGGCCGTTCCTTGTAGACTTACACTCGGACCTCGTCGACATGCATTCGTGGATGGGGGACACACCATAGACTCCTCCTAAGTTTCGAGCTGGACTCAGTGAGAGTTTTCCGGCGCCAGTGTTGTTCTCTCTGTTGAG
ENST00000502732	ENSG00000143322	ABL2	set16	ENSG00000143322	ABL2	-46	809	834	26	TACTCAGCTGCACTGCGTGACACAGG	0.947849	-52.5785	0.576923	1	1	1	1	1	1	5	1	1	0	3	1	A3	ATGTGGCTGGCCGTTCCTTGTAGAC	4	1	A4	AGAGTTTTCCGGCGCCAGTGTTGTT	ATGTGGCTGGCCGTTCCTTGTAGACTTACACTCGGACCTCGTCGACATGCATTTACTCAGCTGCACTGCGTGACACAGGCCTCCTAAGTTTCGAGCTGGACTCAGTGAGAGTTTTCCGGCGCCAGTGTTGTT	ATGTGGCTGGCCGTTCCTTGTAGACTTACACTCGGACCTCGTCGACATGCATTTACTCAGCTGCACTGCGTGACACAGGCCTCCTAAGTTTCGAGCTGGACTCAGTGAGAGTTTTCCGGCGCCAGTGTTGTTTTGCACGTTCTC
ENST00000502732	ENSG00000143322	ABL2	set16	ENSG00000143322	ABL2	-46	11719	11747	29	CTGGGGTTTGTCCAGTGACAGTCATTAGA	0.962151	-53.7785	0.482759	1	1	1	0	1	1	4	1	1	0	3	1	A3	ATGTGGCTGGCCGTTCCTTGTAGAC	4	1	A4	AGAGTTTTCCGGCGCCAGTGTTGTT	ATGTGGCTGGCCGTTCCTTGTAGACTTACACTCGGACCTCGTCGACATGCATTCTGGGGTTTGTCCAGTGACAGTCATTAGACCTCCTAAGTTTCGAGCTGGACTCAGTGAGAGTTTTCCGGCGCCAGTGTTGTT	ATGTGGCTGGCCGTTCCTTGTAGACTTACACTCGGACCTCGTCGACATGCATTCTGGGGTTTGTCCAGTGACAGTCATTAGACCTCCTAAGTTTCGAGCTGGACTCAGTGAGAGTTTTCCGGCGCCAGTGTTGTTGCGCCCATC
ENST00000502732	ENSG00000143322	ABL2	set16	ENSG00000143322	ABL2	-46	11279	11303	25	TGGAGGAGAGCTGGTTTCTCTGGCC	0.957849	-52.4785	0.6	1	1	1	0	1	1	4	1	1	0	3	1	A3	ATGTGGCTGGCCGTTCCTTGTAGAC	4	1	A4	AGAGTTTTCCGGCGCCAGTGTTGTT	ATGTGGCTGGCCGTTCCTTGTAGACTTACACTCGGACCTCGTCGACATGCATTTGGAGGAGAGCTGGTTTCTCTGGCCCCTCCTAAGTTTCGAGCTGGACTCAGTGAGAGTTTTCCGGCGCCAGTGTTGTT	ATGTGGCTGGCCGTTCCTTGTAGACTTACACTCGGACCTCGTCGACATGCATTTGGAGGAGAGCTGGTTTCTCTGGCCCCTCCTAAGTTTCGAGCTGGACTCAGTGAGAGTTTTCCGGCGCCAGTGTTGTTCTGGCGCTGAATC
ENST00000502732	ENSG00000143322	ABL2	set16	ENSG00000143322	ABL2	-46	11220	11248	29	GCGTTCTTGCCACTCACAATACCTGGTAT	0.982151	-53.5785	0.482759	1	1	1	0	1	1	4	1	1	0	3	1	A3	ATGTGGCTGGCCGTTCCTTGTAGAC	4	1	A4	AGAGTTTTCCGGCGCCAGTGTTGTT	ATGTGGCTGGCCGTTCCTTGTAGACTTACACTCGGACCTCGTCGACATGCATTGCGTTCTTGCCACTCACAATACCTGGTATCCTCCTAAGTTTCGAGCTGGACTCAGTGAGAGTTTTCCGGCGCCAGTGTTGTT	ATGTGGCTGGCCGTTCCTTGTAGACTTACACTCGGACCTCGTCGACATGCATTGCGTTCTTGCCACTCACAATACCTGGTATCCTCCTAAGTTTCGAGCTGGACTCAGTGAGAGTTTTCCGGCGCCAGTGTTGTTATAATCCAG
ENST00000502732	ENSG00000143322	ABL2	set16	ENSG00000143322	ABL2	-46	10934	10961	28	TGCTAGCATTCGACAGTTTGCCTCCAGC	0.872151	-54.8785	0.535714	1	1	1	0	1	1	4	1	1	0	3	1	A3	ATGTGGCTGGCCGTTCCTTGTAGAC	4	1	A4	AGAGTTTTCCGGCGCCAGTGTTGTT	ATGTGGCTGGCCGTTCCTTGTAGACTTACACTCGGACCTCGTCGACATGCATTTGCTAGCATTCGACAGTTTGCCTCCAGCCCTCCTAAGTTTCGAGCTGGACTCAGTGAGAGTTTTCCGGCGCCAGTGTTGTT	ATGTGGCTGGCCGTTCCTTGTAGACTTACACTCGGACCTCGTCGACATGCATTTGCTAGCATTCGACAGTTTGCCTCCAGCCCTCCTAAGTTTCGAGCTGGACTCAGTGAGAGTTTTCCGGCGCCAGTGTTGTTTCCACATACC
ENST00000502732	ENSG00000143322	ABL2	set16	ENSG00000143322	ABL2	-46	10872	10899	28	TCAGCTTCTGAGGGTTCAGCTCAGTAGC	0.852151	-55.5785	0.535714	1	1	1	0	1	1	4	1	1	0	3	1	A3	ATGTGGCTGGCCGTTCCTTGTAGAC	4	1	A4	AGAGTTTTCCGGCGCCAGTGTTGTT	ATGTGGCTGGCCGTTCCTTGTAGACTTACACTCGGACCTCGTCGACATGCATTTCAGCTTCTGAGGGTTCAGCTCAGTAGCCCTCCTAAGTTTCGAGCTGGACTCAGTGAGAGTTTTCCGGCGCCAGTGTTGTT	ATGTGGCTGGCCGTTCCTTGTAGACTTACACTCGGACCTCGTCGACATGCATTTCAGCTTCTGAGGGTTCAGCTCAGTAGCCCTCCTAAGTTTCGAGCTGGACTCAGTGAGAGTTTTCCGGCGCCAGTGTTGTTACGGGCTAGT
ENST00000502732	ENSG00000143322	ABL2	set16	ENSG00000143322	ABL2	-46	10748	10775	28	TCTGCTCCAAATATGGTGTGGTCTGAGG	0.977849	-52.9785	0.5	1	1	1	0	1	1	4	1	1	0	3	1	A3	ATGTGGCTGGCCGTTCCTTGTAGAC	4	1	A4	AGAGTTTTCCGGCGCCAGTGTTGTT	ATGTGGCTGGCCGTTCCTTGTAGACTTACACTCGGACCTCGTCGACATGCATTTCTGCTCCAAATATGGTGTGGTCTGAGGCCTCCTAAGTTTCGAGCTGGACTCAGTGAGAGTTTTCCGGCGCCAGTGTTGTT	ATGTGGCTGGCCGTTCCTTGTAGACTTACACTCGGACCTCGTCGACATGCATTTCTGCTCCAAATATGGTGTGGTCTGAGGCCTCCTAAGTTTCGAGCTGGACTCAGTGAGAGTTTTCCGGCGCCAGTGTTGTTGCGTACCTTA
ENST00000502732	ENSG00000143322	ABL2	set16	ENSG00000143322	ABL2	-46	10697	10721	25	TCAACACGCCAGCTGCTCCCTCAGA	0.997849	-52.8785	0.6	1	1	1	1	1	0	4	1	1	0	3	1	A3	ATGTGGCTGGCCGTTCCTTGTAGAC	4	1	A4	AGAGTTTTCCGGCGCCAGTGTTGTT	ATGTGGCTGGCCGTTCCTTGTAGACTTACACTCGGACCTCGTCGACATGCATTTCAACACGCCAGCTGCTCCCTCAGACCTCCTAAGTTTCGAGCTGGACTCAGTGAGAGTTTTCCGGCGCCAGTGTTGTT	ATGTGGCTGGCCGTTCCTTGTAGACTTACACTCGGACCTCGTCGACATGCATTTCAACACGCCAGCTGCTCCCTCAGACCTCCTAAGTTTCGAGCTGGACTCAGTGAGAGTTTTCCGGCGCCAGTGTTGTTCCAGGCGTACGTC
ENST00000502732	ENSG00000143322	ABL2	set16	ENSG00000143322	ABL2	-46	10668	10695	28	TGAACAGGGCTTTGCTACTCTGCTCAGG	0.872151	-54.8785	0.535714	1	1	1	0	1	1	4	1	1	0	3	1	A3	ATGTGGCTGGCCGTTCCTTGTAGAC	4	1	A4	AGAGTTTTCCGGCGCCAGTGTTGTT	ATGTGGCTGGCCGTTCCTTGTAGACTTACACTCGGACCTCGTCGACATGCATTTGAACAGGGCTTTGCTACTCTGCTCAGGCCTCCTAAGTTTCGAGCTGGACTCAGTGAGAGTTTTCCGGCGCCAGTGTTGTT	ATGTGGCTGGCCGTTCCTTGTAGACTTACACTCGGACCTCGTCGACATGCATTTGAACAGGGCTTTGCTACTCTGCTCAGGCCTCCTAAGTTTCGAGCTGGACTCAGTGAGAGTTTTCCGGCGCCAGTGTTGTTTGACCCGGAA
ENST00000502732	ENSG00000143322	ABL2	set16	ENSG00000143322	ABL2	-46	1032	1058	27	GTAATGTTGTCACCAGCCCATCAGCCA	0.957849	-52.2785	0.518519	1	1	1	1	1	1	5	1	1	0	3	1	A3	ATGTGGCTGGCCGTTCCTTGTAGAC	4	1	A4	AGAGTTTTCCGGCGCCAGTGTTGTT	ATGTGGCTGGCCGTTCCTTGTAGACTTACACTCGGACCTCGTCGACATGCATTGTAATGTTGTCACCAGCCCATCAGCCACCTCCTAAGTTTCGAGCTGGACTCAGTGAGAGTTTTCCGGCGCCAGTGTTGTT	ATGTGGCTGGCCGTTCCTTGTAGACTTACACTCGGACCTCGTCGACATGCATTGTAATGTTGTCACCAGCCCATCAGCCACCTCCTAAGTTTCGAGCTGGACTCAGTGAGAGTTTTCCGGCGCCAGTGTTGTTCTGTGCGGGCC
ENST00000502732	ENSG00000143322	ABL2	set16	ENSG00000143322	ABL2	-46	977	1002	26	AAGGTGCTGAAGCGGCTCTCAGCAGT	0.972151	-53.5785	0.576923	1	1	1	1	1	1	5	1	1	0	3	1	A3	ATGTGGCTGGCCGTTCCTTGTAGAC	4	1	A4	AGAGTTTTCCGGCGCCAGTGTTGTT	ATGTGGCTGGCCGTTCCTTGTAGACTTACACTCGGACCTCGTCGACATGCATTAAGGTGCTGAAGCGGCTCTCAGCAGTCCTCCTAAGTTTCGAGCTGGACTCAGTGAGAGTTTTCCGGCGCCAGTGTTGTT	ATGTGGCTGGCCGTTCCTTGTAGACTTACACTCGGACCTCGTCGACATGCATTAAGGTGCTGAAGCGGCTCTCAGCAGTCCTCCTAAGTTTCGAGCTGGACTCAGTGAGAGTTTTCCGGCGCCAGTGTTGTTCCCGTCGGAGCT
ENST00000502732	ENSG00000143322	ABL2	set16	ENSG00000143322	ABL2	-46	10309	10337	29	CTCTCAGCAGTTTCTGCCATTCCAAGTCA	0.982151	-53.9785	0.482759	1	1	1	0	1	1	4	1	1	0	3	1	A3	ATGTGGCTGGCCGTTCCTTGTAGAC	4	1	A4	AGAGTTTTCCGGCGCCAGTGTTGTT	ATGTGGCTGGCCGTTCCTTGTAGACTTACACTCGGACCTCGTCGACATGCATTCTCTCAGCAGTTTCTGCCATTCCAAGTCACCTCCTAAGTTTCGAGCTGGACTCAGTGAGAGTTTTCCGGCGCCAGTGTTGTT	ATGTGGCTGGCCGTTCCTTGTAGACTTACACTCGGACCTCGTCGACATGCATTCTCTCAGCAGTTTCTGCCATTCCAAGTCACCTCCTAAGTTTCGAGCTGGACTCAGTGAGAGTTTTCCGGCGCCAGTGTTGTTTAGGTGGCG
ENST00000502732	ENSG00000143322	ABL2	set16	ENSG00000143322	ABL2	-46	836	863	28	AGCTGCCATTGATTAGACTGCTGAGCAG	0.937849	-53.0785	0.5	1	1	1	1	1	1	5	1	1	0	3	1	A3	ATGTGGCTGGCCGTTCCTTGTAGAC	4	1	A4	AGAGTTTTCCGGCGCCAGTGTTGTT	ATGTGGCTGGCCGTTCCTTGTAGACTTACACTCGGACCTCGTCGACATGCATTAGCTGCCATTGATTAGACTGCTGAGCAGCCTCCTAAGTTTCGAGCTGGACTCAGTGAGAGTTTTCCGGCGCCAGTGTTGTT	ATGTGGCTGGCCGTTCCTTGTAGACTTACACTCGGACCTCGTCGACATGCATTAGCTGCCATTGATTAGACTGCTGAGCAGCCTCCTAAGTTTCGAGCTGGACTCAGTGAGAGTTTTCCGGCGCCAGTGTTGTTCCTAACACCG
ENST00000502732	ENSG00000143322	ABL2	set16	ENSG00000143322	ABL2	-46	10187	10219	33	AATTTCCTGTCCTTTGGATCTAGGATATTGAGT	0.962151	-54.8785	0.363636	1	1	1	0	1	1	4	1	1	0	3	1	A3	ATGTGGCTGGCCGTTCCTTGTAGAC	4	1	A4	AGAGTTTTCCGGCGCCAGTGTTGTT	ATGTGGCTGGCCGTTCCTTGTAGACTTACACTCGGACCTCGTCGACATGCATTAATTTCCTGTCCTTTGGATCTAGGATATTGAGTCCTCCTAAGTTTCGAGCTGGACTCAGTGAGAGTTTTCCGGCGCCAGTGTTGTT	ATGTGGCTGGCCGTTCCTTGTAGACTTACACTCGGACCTCGTCGACATGCATTAATTTCCTGTCCTTTGGATCTAGGATATTGAGTCCTCCTAAGTTTCGAGCTGGACTCAGTGAGAGTTTTCCGGCGCCAGTGTTGTTTACCC
ENST00000502732	ENSG00000143322	ABL2	set16	ENSG00000143322	ABL2	-46	9739	9763	25	GGACTGAGTCATGGGGGTGAGTGCT	0.977849	-52.3785	0.6	1	1	1	0	1	1	4	1	1	0	3	1	A3	ATGTGGCTGGCCGTTCCTTGTAGAC	4	1	A4	AGAGTTTTCCGGCGCCAGTGTTGTT	ATGTGGCTGGCCGTTCCTTGTAGACTTACACTCGGACCTCGTCGACATGCATTGGACTGAGTCATGGGGGTGAGTGCTCCTCCTAAGTTTCGAGCTGGACTCAGTGAGAGTTTTCCGGCGCCAGTGTTGTT	ATGTGGCTGGCCGTTCCTTGTAGACTTACACTCGGACCTCGTCGACATGCATTGGACTGAGTCATGGGGGTGAGTGCTCCTCCTAAGTTTCGAGCTGGACTCAGTGAGAGTTTTCCGGCGCCAGTGTTGTTCCGGCCGCGAAAG
ENST00000502732	ENSG00000143322	ABL2	set16	ENSG00000143322	ABL2	-46	8426	8454	29	TTGAGTCAAGGTCCTTGGAAGAGCTTCTG	0.997849	-53.8785	0.482759	1	1	1	0	1	1	4	1	1	0	3	1	A3	ATGTGGCTGGCCGTTCCTTGTAGAC	4	1	A4	AGAGTTTTCCGGCGCCAGTGTTGTT	ATGTGGCTGGCCGTTCCTTGTAGACTTACACTCGGACCTCGTCGACATGCATTTTGAGTCAAGGTCCTTGGAAGAGCTTCTGCCTCCTAAGTTTCGAGCTGGACTCAGTGAGAGTTTTCCGGCGCCAGTGTTGTT	ATGTGGCTGGCCGTTCCTTGTAGACTTACACTCGGACCTCGTCGACATGCATTTTGAGTCAAGGTCCTTGGAAGAGCTTCTGCCTCCTAAGTTTCGAGCTGGACTCAGTGAGAGTTTTCCGGCGCCAGTGTTGTTGGTGCAGCT
ENST00000502732	ENSG00000143322	ABL2	set16	ENSG00000143322	ABL2	-46	8186	8215	30	GGGTCCATCCACATTGAATCAACTGTCTTA	0.977849	-53.2785	0.433333	1	1	1	1	1	0	4	1	1	0	3	1	A3	ATGTGGCTGGCCGTTCCTTGTAGAC	4	1	A4	AGAGTTTTCCGGCGCCAGTGTTGTT	ATGTGGCTGGCCGTTCCTTGTAGACTTACACTCGGACCTCGTCGACATGCATTGGGTCCATCCACATTGAATCAACTGTCTTACCTCCTAAGTTTCGAGCTGGACTCAGTGAGAGTTTTCCGGCGCCAGTGTTGTT	ATGTGGCTGGCCGTTCCTTGTAGACTTACACTCGGACCTCGTCGACATGCATTGGGTCCATCCACATTGAATCAACTGTCTTACCTCCTAAGTTTCGAGCTGGACTCAGTGAGAGTTTTCCGGCGCCAGTGTTGTTCAGAAGCA
ENST00000502732	ENSG00000143322	ABL2	set16	ENSG00000143322	ABL2	-46	7981	8012	32	CTTTACTACAAAGTGCACATTGCTGTGTTGCT	0.972151	-54.3785	0.40625	1	1	1	0	1	1	4	1	1	0	3	1	A3	ATGTGGCTGGCCGTTCCTTGTAGAC	4	1	A4	AGAGTTTTCCGGCGCCAGTGTTGTT	ATGTGGCTGGCCGTTCCTTGTAGACTTACACTCGGACCTCGTCGACATGCATTCTTTACTACAAAGTGCACATTGCTGTGTTGCTCCTCCTAAGTTTCGAGCTGGACTCAGTGAGAGTTTTCCGGCGCCAGTGTTGTT	ATGTGGCTGGCCGTTCCTTGTAGACTTACACTCGGACCTCGTCGACATGCATTCTTTACTACAAAGTGCACATTGCTGTGTTGCTCCTCCTAAGTTTCGAGCTGGACTCAGTGAGAGTTTTCCGGCGCCAGTGTTGTTGCGACA
ENST00000502732	ENSG00000143322	ABL2	set16	ENSG00000143322	ABL2	-46	7883	7912	30	GCTTGTGTTCCCATTACTCCACATTCAAGC	0.932151	-54.2785	0.466667	1	1	1	0	1	1	4	1	1	0	3	1	A3	ATGTGGCTGGCCGTTCCTTGTAGAC	4	1	A4	AGAGTTTTCCGGCGCCAGTGTTGTT	ATGTGGCTGGCCGTTCCTTGTAGACTTACACTCGGACCTCGTCGACATGCATTGCTTGTGTTCCCATTACTCCACATTCAAGCCCTCCTAAGTTTCGAGCTGGACTCAGTGAGAGTTTTCCGGCGCCAGTGTTGTT	ATGTGGCTGGCCGTTCCTTGTAGACTTACACTCGGACCTCGTCGACATGCATTGCTTGTGTTCCCATTACTCCACATTCAAGCCCTCCTAAGTTTCGAGCTGGACTCAGTGAGAGTTTTCCGGCGCCAGTGTTGTTTTTTAGCC
ENST00000502732	ENSG00000143322	ABL2	set16	ENSG00000143322	ABL2	-46	7793	7822	30	GATTGTCGGTCTGAGCCACTTTTTTGCAGT	0.932151	-54.4785	0.466667	1	1	1	0	1	1	4	1	1	0	3	1	A3	ATGTGGCTGGCCGTTCCTTGTAGAC	4	1	A4	AGAGTTTTCCGGCGCCAGTGTTGTT	ATGTGGCTGGCCGTTCCTTGTAGACTTACACTCGGACCTCGTCGACATGCATTGATTGTCGGTCTGAGCCACTTTTTTGCAGTCCTCCTAAGTTTCGAGCTGGACTCAGTGAGAGTTTTCCGGCGCCAGTGTTGTT	ATGTGGCTGGCCGTTCCTTGTAGACTTACACTCGGACCTCGTCGACATGCATTGATTGTCGGTCTGAGCCACTTTTTTGCAGTCCTCCTAAGTTTCGAGCTGGACTCAGTGAGAGTTTTCCGGCGCCAGTGTTGTTTTCTGTGC
ENST00000502732	ENSG00000143322	ABL2	set16	ENSG00000143322	ABL2	-46	7519	7545	27	TGGGAATTCTGATCTGGAGTGGGGCTA	0.972151	-53.2785	0.518519	1	1	1	0	1	1	4	1	1	0	3	1	A3	ATGTGGCTGGCCGTTCCTTGTAGAC	4	1	A4	AGAGTTTTCCGGCGCCAGTGTTGTT	ATGTGGCTGGCCGTTCCTTGTAGACTTACACTCGGACCTCGTCGACATGCATTTGGGAATTCTGATCTGGAGTGGGGCTACCTCCTAAGTTTCGAGCTGGACTCAGTGAGAGTTTTCCGGCGCCAGTGTTGTT	ATGTGGCTGGCCGTTCCTTGTAGACTTACACTCGGACCTCGTCGACATGCATTTGGGAATTCTGATCTGGAGTGGGGCTACCTCCTAAGTTTCGAGCTGGACTCAGTGAGAGTTTTCCGGCGCCAGTGTTGTTTCATCGGGCCA
ENST00000502732	ENSG00000143322	ABL2	set16	ENSG00000143322	ABL2	-46	7454	7478	25	CCCTAGGGGATTCTGCTGTGCATCC	0.877849	-51.1785	0.6	1	1	1	0	1	1	4	1	1	0	3	1	A3	ATGTGGCTGGCCGTTCCTTGTAGAC	4	1	A4	AGAGTTTTCCGGCGCCAGTGTTGTT	ATGTGGCTGGCCGTTCCTTGTAGACTTACACTCGGACCTCGTCGACATGCATTCCCTAGGGGATTCTGCTGTGCATCCCCTCCTAAGTTTCGAGCTGGACTCAGTGAGAGTTTTCCGGCGCCAGTGTTGTT	ATGTGGCTGGCCGTTCCTTGTAGACTTACACTCGGACCTCGTCGACATGCATTCCCTAGGGGATTCTGCTGTGCATCCCCTCCTAAGTTTCGAGCTGGACTCAGTGAGAGTTTTCCGGCGCCAGTGTTGTTCTCTTACCGGTGG
ENST00000502732	ENSG00000143322	ABL2	set16	ENSG00000143322	ABL2	-46	6641	6670	30	CTTTTCCAGAAGCAGTTCTCTCTGCTTTGG	0.937849	-53.4785	0.466667	1	1	1	0	1	1	4	1	1	0	3	1	A3	ATGTGGCTGGCCGTTCCTTGTAGAC	4	1	A4	AGAGTTTTCCGGCGCCAGTGTTGTT	ATGTGGCTGGCCGTTCCTTGTAGACTTACACTCGGACCTCGTCGACATGCATTCTTTTCCAGAAGCAGTTCTCTCTGCTTTGGCCTCCTAAGTTTCGAGCTGGACTCAGTGAGAGTTTTCCGGCGCCAGTGTTGTT	ATGTGGCTGGCCGTTCCTTGTAGACTTACACTCGGACCTCGTCGACATGCATTCTTTTCCAGAAGCAGTTCTCTCTGCTTTGGCCTCCTAAGTTTCGAGCTGGACTCAGTGAGAGTTTTCCGGCGCCAGTGTTGTTTAGCGCGC
ENST00000502732	ENSG00000143322	ABL2	set16	ENSG00000143322	ABL2	-46	6377	6402	26	CCCACTGTAGGCAAGACAGCTAGGTG	0.877849	-51.5785	0.576923	1	1	1	1	1	0	4	1	1	0	3	1	A3	ATGTGGCTGGCCGTTCCTTGTAGAC	4	1	A4	AGAGTTTTCCGGCGCCAGTGTTGTT	ATGTGGCTGGCCGTTCCTTGTAGACTTACACTCGGACCTCGTCGACATGCATTCCCACTGTAGGCAAGACAGCTAGGTGCCTCCTAAGTTTCGAGCTGGACTCAGTGAGAGTTTTCCGGCGCCAGTGTTGTT	ATGTGGCTGGCCGTTCCTTGTAGACTTACACTCGGACCTCGTCGACATGCATTCCCACTGTAGGCAAGACAGCTAGGTGCCTCCTAAGTTTCGAGCTGGACTCAGTGAGAGTTTTCCGGCGCCAGTGTTGTTAGGGTTAGTCCC
ENST00000502732	ENSG00000143322	ABL2	set16	ENSG00000143322	ABL2	-46	5994	6023	30	AGGACCGCTGGTTTTTACATCTGAGTTCTC	0.942151	-54.5785	0.466667	1	1	1	0	1	1	4	1	1	0	3	1	A3	ATGTGGCTGGCCGTTCCTTGTAGAC	4	1	A4	AGAGTTTTCCGGCGCCAGTGTTGTT	ATGTGGCTGGCCGTTCCTTGTAGACTTACACTCGGACCTCGTCGACATGCATTAGGACCGCTGGTTTTTACATCTGAGTTCTCCCTCCTAAGTTTCGAGCTGGACTCAGTGAGAGTTTTCCGGCGCCAGTGTTGTT	ATGTGGCTGGCCGTTCCTTGTAGACTTACACTCGGACCTCGTCGACATGCATTAGGACCGCTGGTTTTTACATCTGAGTTCTCCCTCCTAAGTTTCGAGCTGGACTCAGTGAGAGTTTTCCGGCGCCAGTGTTGTTTTAGCGGT
ENST00000502732	ENSG00000143322	ABL2	set16	ENSG00000143322	ABL2	-46	5939	5964	26	TCACTAGCTGCCTGTGCTGCAACTGC	0.972151	-53.4785	0.576923	1	1	1	0	1	1	4	1	1	0	3	1	A3	ATGTGGCTGGCCGTTCCTTGTAGAC	4	1	A4	AGAGTTTTCCGGCGCCAGTGTTGTT	ATGTGGCTGGCCGTTCCTTGTAGACTTACACTCGGACCTCGTCGACATGCATTTCACTAGCTGCCTGTGCTGCAACTGCCCTCCTAAGTTTCGAGCTGGACTCAGTGAGAGTTTTCCGGCGCCAGTGTTGTT	ATGTGGCTGGCCGTTCCTTGTAGACTTACACTCGGACCTCGTCGACATGCATTTCACTAGCTGCCTGTGCTGCAACTGCCCTCCTAAGTTTCGAGCTGGACTCAGTGAGAGTTTTCCGGCGCCAGTGTTGTTGTGAGTACAAGA
ENST00000502732	ENSG00000143322	ABL2	set16	ENSG00000143322	ABL2	-46	5398	5427	30	AATATGTGTGTATTGAGCTCTCCTTGGGGA	0.962151	-54.0785	0.433333	1	1	1	0	1	1	4	1	1	0	3	1	A3	ATGTGGCTGGCCGTTCCTTGTAGAC	4	1	A4	AGAGTTTTCCGGCGCCAGTGTTGTT	ATGTGGCTGGCCGTTCCTTGTAGACTTACACTCGGACCTCGTCGACATGCATTAATATGTGTGTATTGAGCTCTCCTTGGGGACCTCCTAAGTTTCGAGCTGGACTCAGTGAGAGTTTTCCGGCGCCAGTGTTGTT	ATGTGGCTGGCCGTTCCTTGTAGACTTACACTCGGACCTCGTCGACATGCATTAATATGTGTGTATTGAGCTCTCCTTGGGGACCTCCTAAGTTTCGAGCTGGACTCAGTGAGAGTTTTCCGGCGCCAGTGTTGTTCGATATTG
ENST00000502732	ENSG00000143322	ABL2	set16	ENSG00000143322	ABL2	-46	4449	4479	31	TCAACTTTCCAGCATTCTTTACTTCCTGCAC	0.997849	-54.0785	0.419355	1	1	1	0	1	1	4	1	1	0	3	1	A3	ATGTGGCTGGCCGTTCCTTGTAGAC	4	1	A4	AGAGTTTTCCGGCGCCAGTGTTGTT	ATGTGGCTGGCCGTTCCTTGTAGACTTACACTCGGACCTCGTCGACATGCATTTCAACTTTCCAGCATTCTTTACTTCCTGCACCCTCCTAAGTTTCGAGCTGGACTCAGTGAGAGTTTTCCGGCGCCAGTGTTGTT	ATGTGGCTGGCCGTTCCTTGTAGACTTACACTCGGACCTCGTCGACATGCATTTCAACTTTCCAGCATTCTTTACTTCCTGCACCCTCCTAAGTTTCGAGCTGGACTCAGTGAGAGTTTTCCGGCGCCAGTGTTGTTACCAGGC
ENST00000502732	ENSG00000143322	ABL2	set16	ENSG00000143322	ABL2	-46	4352	4385	34	ATGTTGTAGCACTCTGATTTGCAGTTCTTATTAC	0.982151	-55.0785	0.352941	1	1	1	0	1	1	4	1	1	0	3	1	A3	ATGTGGCTGGCCGTTCCTTGTAGAC	4	1	A4	AGAGTTTTCCGGCGCCAGTGTTGTT	ATGTGGCTGGCCGTTCCTTGTAGACTTACACTCGGACCTCGTCGACATGCATTATGTTGTAGCACTCTGATTTGCAGTTCTTATTACCCTCCTAAGTTTCGAGCTGGACTCAGTGAGAGTTTTCCGGCGCCAGTGTTGTT	ATGTGGCTGGCCGTTCCTTGTAGACTTACACTCGGACCTCGTCGACATGCATTATGTTGTAGCACTCTGATTTGCAGTTCTTATTACCCTCCTAAGTTTCGAGCTGGACTCAGTGAGAGTTTTCCGGCGCCAGTGTTGTTCCCA
ENST00000502732	ENSG00000143322	ABL2	set16	ENSG00000143322	ABL2	-46	4260	4292	33	ATTTCTCTTGGTACATTCCCAGCTTTCTTTTCT	0.992151	-54.5785	0.363636	1	1	1	0	1	1	4	1	1	0	3	1	A3	ATGTGGCTGGCCGTTCCTTGTAGAC	4	1	A4	AGAGTTTTCCGGCGCCAGTGTTGTT	ATGTGGCTGGCCGTTCCTTGTAGACTTACACTCGGACCTCGTCGACATGCATTATTTCTCTTGGTACATTCCCAGCTTTCTTTTCTCCTCCTAAGTTTCGAGCTGGACTCAGTGAGAGTTTTCCGGCGCCAGTGTTGTT	ATGTGGCTGGCCGTTCCTTGTAGACTTACACTCGGACCTCGTCGACATGCATTATTTCTCTTGGTACATTCCCAGCTTTCTTTTCTCCTCCTAAGTTTCGAGCTGGACTCAGTGAGAGTTTTCCGGCGCCAGTGTTGTTCGTTT
ENST00000502732	ENSG00000143322	ABL2	set16	ENSG00000143322	ABL2	-46	4172	4195	24	AGGTCTGGGTGCAGCTGCTGCAGT	0.957849	-52.0785	0.625	1	1	1	0	1	1	4	1	1	0	3	1	A3	ATGTGGCTGGCCGTTCCTTGTAGAC	4	1	A4	AGAGTTTTCCGGCGCCAGTGTTGTT	ATGTGGCTGGCCGTTCCTTGTAGACTTACACTCGGACCTCGTCGACATGCATTAGGTCTGGGTGCAGCTGCTGCAGTCCTCCTAAGTTTCGAGCTGGACTCAGTGAGAGTTTTCCGGCGCCAGTGTTGTT	ATGTGGCTGGCCGTTCCTTGTAGACTTACACTCGGACCTCGTCGACATGCATTAGGTCTGGGTGCAGCTGCTGCAGTCCTCCTAAGTTTCGAGCTGGACTCAGTGAGAGTTTTCCGGCGCCAGTGTTGTTTCAGGTAGTAAGGC
ENST00000502732	ENSG00000143322	ABL2	set16	ENSG00000143322	ABL2	-46	4146	4170	25	TTGCTGAGAGCAGCCCTGCCTAGCA	0.962151	-53.3785	0.6	1	1	1	0	1	1	4	1	1	0	3	1	A3	ATGTGGCTGGCCGTTCCTTGTAGAC	4	1	A4	AGAGTTTTCCGGCGCCAGTGTTGTT	ATGTGGCTGGCCGTTCCTTGTAGACTTACACTCGGACCTCGTCGACATGCATTTTGCTGAGAGCAGCCCTGCCTAGCACCTCCTAAGTTTCGAGCTGGACTCAGTGAGAGTTTTCCGGCGCCAGTGTTGTT	ATGTGGCTGGCCGTTCCTTGTAGACTTACACTCGGACCTCGTCGACATGCATTTTGCTGAGAGCAGCCCTGCCTAGCACCTCCTAAGTTTCGAGCTGGACTCAGTGAGAGTTTTCCGGCGCCAGTGTTGTTCTGGGAAATTCTG
ENST00000502732	ENSG00000143322	ABL2	set16	ENSG00000143322	ABL2	-46	4057	4085	29	CCTATTTTCCAGTGCAGTTTCCAACCCTG	0.917849	-52.1785	0.482759	1	1	1	0	1	1	4	1	1	0	3	1	A3	ATGTGGCTGGCCGTTCCTTGTAGAC	4	1	A4	AGAGTTTTCCGGCGCCAGTGTTGTT	ATGTGGCTGGCCGTTCCTTGTAGACTTACACTCGGACCTCGTCGACATGCATTCCTATTTTCCAGTGCAGTTTCCAACCCTGCCTCCTAAGTTTCGAGCTGGACTCAGTGAGAGTTTTCCGGCGCCAGTGTTGTT	ATGTGGCTGGCCGTTCCTTGTAGACTTACACTCGGACCTCGTCGACATGCATTCCTATTTTCCAGTGCAGTTTCCAACCCTGCCTCCTAAGTTTCGAGCTGGACTCAGTGAGAGTTTTCCGGCGCCAGTGTTGTTAGTCCCCTC
ENST00000502732	ENSG00000143322	ABL2	set16	ENSG00000143322	ABL2	-46	3800	3828	29	TACCTCTGCACCACATCACTGATTTCCTG	0.952151	-53.9785	0.482759	1	1	1	0	1	1	4	1	1	0	3	1	A3	ATGTGGCTGGCCGTTCCTTGTAGAC	4	1	A4	AGAGTTTTCCGGCGCCAGTGTTGTT	ATGTGGCTGGCCGTTCCTTGTAGACTTACACTCGGACCTCGTCGACATGCATTTACCTCTGCACCACATCACTGATTTCCTGCCTCCTAAGTTTCGAGCTGGACTCAGTGAGAGTTTTCCGGCGCCAGTGTTGTT	ATGTGGCTGGCCGTTCCTTGTAGACTTACACTCGGACCTCGTCGACATGCATTTACCTCTGCACCACATCACTGATTTCCTGCCTCCTAAGTTTCGAGCTGGACTCAGTGAGAGTTTTCCGGCGCCAGTGTTGTTCGGGGTCGC
ENST00000502732	ENSG00000143322	ABL2	set16	ENSG00000143322	ABL2	-46	7853	7881	29	CCTTAAGGTCAAAGTGTCAGGAGCATGTG	0.907849	-52.4785	0.482759	1	1	1	1	1	1	5	1	1	0	3	1	A3	ATGTGGCTGGCCGTTCCTTGTAGAC	4	1	A4	AGAGTTTTCCGGCGCCAGTGTTGTT	ATGTGGCTGGCCGTTCCTTGTAGACTTACACTCGGACCTCGTCGACATGCATTCCTTAAGGTCAAAGTGTCAGGAGCATGTGCCTCCTAAGTTTCGAGCTGGACTCAGTGAGAGTTTTCCGGCGCCAGTGTTGTT	ATGTGGCTGGCCGTTCCTTGTAGACTTACACTCGGACCTCGTCGACATGCATTCCTTAAGGTCAAAGTGTCAGGAGCATGTGCCTCCTAAGTTTCGAGCTGGACTCAGTGAGAGTTTTCCGGCGCCAGTGTTGTTTCGCTTGCA
ENST00000502732	ENSG00000143322	ABL2	set16	ENSG00000143322	ABL2	-46	12120	12147	28	GAAAGCAGTCCCTTTCAAGGGCCTCATT	0.977849	-52.9785	0.5	1	1	1	1	1	1	5	1	1	0	3	1	A3	ATGTGGCTGGCCGTTCCTTGTAGAC	4	1	A4	AGAGTTTTCCGGCGCCAGTGTTGTT	ATGTGGCTGGCCGTTCCTTGTAGACTTACACTCGGACCTCGTCGACATGCATTGAAAGCAGTCCCTTTCAAGGGCCTCATTCCTCCTAAGTTTCGAGCTGGACTCAGTGAGAGTTTTCCGGCGCCAGTGTTGTT	ATGTGGCTGGCCGTTCCTTGTAGACTTACACTCGGACCTCGTCGACATGCATTGAAAGCAGTCCCTTTCAAGGGCCTCATTCCTCCTAAGTTTCGAGCTGGACTCAGTGAGAGTTTTCCGGCGCCAGTGTTGTTAGCGCTCCTG
ENST00000502732	ENSG00000143322	ABL2	set16	ENSG00000143322	ABL2	-46	11907	11932	26	AGCAATGCACACAGTGCCCGATGCTC	0.992151	-52.8785	0.576923	1	1	1	1	1	1	5	1	1	0	3	1	A3	ATGTGGCTGGCCGTTCCTTGTAGAC	4	1	A4	AGAGTTTTCCGGCGCCAGTGTTGTT	ATGTGGCTGGCCGTTCCTTGTAGACTTACACTCGGACCTCGTCGACATGCATTAGCAATGCACACAGTGCCCGATGCTCCCTCCTAAGTTTCGAGCTGGACTCAGTGAGAGTTTTCCGGCGCCAGTGTTGTT	ATGTGGCTGGCCGTTCCTTGTAGACTTACACTCGGACCTCGTCGACATGCATTAGCAATGCACACAGTGCCCGATGCTCCCTCCTAAGTTTCGAGCTGGACTCAGTGAGAGTTTTCCGGCGCCAGTGTTGTTTACCTATGGAGA
ENST00000502732	ENSG00000143322	ABL2	set16	ENSG00000143322	ABL2	-46	11788	11816	29	TGTTTGGGGACAAAGTTCTGTCAACCACC	0.922151	-53.7785	0.482759	1	1	1	1	1	1	5	1	1	0	3	1	A3	ATGTGGCTGGCCGTTCCTTGTAGAC	4	1	A4	AGAGTTTTCCGGCGCCAGTGTTGTT	ATGTGGCTGGCCGTTCCTTGTAGACTTACACTCGGACCTCGTCGACATGCATTTGTTTGGGGACAAAGTTCTGTCAACCACCCCTCCTAAGTTTCGAGCTGGACTCAGTGAGAGTTTTCCGGCGCCAGTGTTGTT	ATGTGGCTGGCCGTTCCTTGTAGACTTACACTCGGACCTCGTCGACATGCATTTGTTTGGGGACAAAGTTCTGTCAACCACCCCTCCTAAGTTTCGAGCTGGACTCAGTGAGAGTTTTCCGGCGCCAGTGTTGTTCGACAATAA
ENST00000502732	ENSG00000143322	ABL2	set16	ENSG00000143322	ABL2	-46	11660	11686	27	TCTGGGAGGAGATGGAGGTTCTGAGTA	0.997849	-53.4785	0.518519	1	1	1	1	1	1	5	1	1	0	3	1	A3	ATGTGGCTGGCCGTTCCTTGTAGAC	4	1	A4	AGAGTTTTCCGGCGCCAGTGTTGTT	ATGTGGCTGGCCGTTCCTTGTAGACTTACACTCGGACCTCGTCGACATGCATTTCTGGGAGGAGATGGAGGTTCTGAGTACCTCCTAAGTTTCGAGCTGGACTCAGTGAGAGTTTTCCGGCGCCAGTGTTGTT	ATGTGGCTGGCCGTTCCTTGTAGACTTACACTCGGACCTCGTCGACATGCATTTCTGGGAGGAGATGGAGGTTCTGAGTACCTCCTAAGTTTCGAGCTGGACTCAGTGAGAGTTTTCCGGCGCCAGTGTTGTTCACTTGCCCTA
ENST00000502732	ENSG00000143322	ABL2	set16	ENSG00000143322	ABL2	-46	11156	11186	31	GTTTACTGTTGATGACACTAAAGCGTTCCCA	0.957849	-53.4785	0.419355	1	1	1	1	1	1	5	1	1	0	3	1	A3	ATGTGGCTGGCCGTTCCTTGTAGAC	4	1	A4	AGAGTTTTCCGGCGCCAGTGTTGTT	ATGTGGCTGGCCGTTCCTTGTAGACTTACACTCGGACCTCGTCGACATGCATTGTTTACTGTTGATGACACTAAAGCGTTCCCACCTCCTAAGTTTCGAGCTGGACTCAGTGAGAGTTTTCCGGCGCCAGTGTTGTT	ATGTGGCTGGCCGTTCCTTGTAGACTTACACTCGGACCTCGTCGACATGCATTGTTTACTGTTGATGACACTAAAGCGTTCCCACCTCCTAAGTTTCGAGCTGGACTCAGTGAGAGTTTTCCGGCGCCAGTGTTGTTCCGCACC
ENST00000502732	ENSG00000143322	ABL2	set16	ENSG00000143322	ABL2	-46	10462	10486	25	CAGATGGAGGATCTGGCCACTGCCA	0.967849	-52.1785	0.6	1	1	1	1	1	1	5	1	1	0	3	1	A3	ATGTGGCTGGCCGTTCCTTGTAGAC	4	1	A4	AGAGTTTTCCGGCGCCAGTGTTGTT	ATGTGGCTGGCCGTTCCTTGTAGACTTACACTCGGACCTCGTCGACATGCATTCAGATGGAGGATCTGGCCACTGCCACCTCCTAAGTTTCGAGCTGGACTCAGTGAGAGTTTTCCGGCGCCAGTGTTGTT	ATGTGGCTGGCCGTTCCTTGTAGACTTACACTCGGACCTCGTCGACATGCATTCAGATGGAGGATCTGGCCACTGCCACCTCCTAAGTTTCGAGCTGGACTCAGTGAGAGTTTTCCGGCGCCAGTGTTGTTGTGTACCGCCTAT
ENST00000502732	ENSG00000143322	ABL2	set16	ENSG00000143322	ABL2	-46	10339	10367	29	TCTTTGAAGGCACAAATCTCCAAGGGTGG	0.962151	-53.5785	0.482759	1	1	1	1	1	1	5	1	1	0	3	1	A3	ATGTGGCTGGCCGTTCCTTGTAGAC	4	1	A4	AGAGTTTTCCGGCGCCAGTGTTGTT	ATGTGGCTGGCCGTTCCTTGTAGACTTACACTCGGACCTCGTCGACATGCATTTCTTTGAAGGCACAAATCTCCAAGGGTGGCCTCCTAAGTTTCGAGCTGGACTCAGTGAGAGTTTTCCGGCGCCAGTGTTGTT	ATGTGGCTGGCCGTTCCTTGTAGACTTACACTCGGACCTCGTCGACATGCATTTCTTTGAAGGCACAAATCTCCAAGGGTGGCCTCCTAAGTTTCGAGCTGGACTCAGTGAGAGTTTTCCGGCGCCAGTGTTGTTTTCCATCTA
ENST00000502732	ENSG00000143322	ABL2	set16	ENSG00000143322	ABL2	-46	10247	10278	32	TTACCTGGGAAGAAGTATGGGATCTTCTTATC	0.912151	-55.2785	0.40625	1	1	1	1	1	1	5	1	1	0	3	1	A3	ATGTGGCTGGCCGTTCCTTGTAGAC	4	1	A4	AGAGTTTTCCGGCGCCAGTGTTGTT	ATGTGGCTGGCCGTTCCTTGTAGACTTACACTCGGACCTCGTCGACATGCATTTTACCTGGGAAGAAGTATGGGATCTTCTTATCCCTCCTAAGTTTCGAGCTGGACTCAGTGAGAGTTTTCCGGCGCCAGTGTTGTT	ATGTGGCTGGCCGTTCCTTGTAGACTTACACTCGGACCTCGTCGACATGCATTTTACCTGGGAAGAAGTATGGGATCTTCTTATCCCTCCTAAGTTTCGAGCTGGACTCAGTGAGAGTTTTCCGGCGCCAGTGTTGTTACTTTA
ENST00000502732	ENSG00000143322	ABL2	set16	ENSG00000143322	ABL2	-46	9711	9737	27	CAGAGTAGGCTGTAGCTTGTCCCACAG	0.937849	-52.6785	0.555556	1	1	1	1	1	1	5	1	1	0	3	1	A3	ATGTGGCTGGCCGTTCCTTGTAGAC	4	1	A4	AGAGTTTTCCGGCGCCAGTGTTGTT	ATGTGGCTGGCCGTTCCTTGTAGACTTACACTCGGACCTCGTCGACATGCATTCAGAGTAGGCTGTAGCTTGTCCCACAGCCTCCTAAGTTTCGAGCTGGACTCAGTGAGAGTTTTCCGGCGCCAGTGTTGTT	ATGTGGCTGGCCGTTCCTTGTAGACTTACACTCGGACCTCGTCGACATGCATTCAGAGTAGGCTGTAGCTTGTCCCACAGCCTCCTAAGTTTCGAGCTGGACTCAGTGAGAGTTTTCCGGCGCCAGTGTTGTTTCTGATAGATT
ENST00000502732	ENSG00000143322	ABL2	set16	ENSG00000143322	ABL2	-46	9682	9709	28	CCTGAATCCCACCCATGCTTCTCAGTAA	0.977849	-52.8785	0.5	1	1	1	1	1	1	5	1	1	0	3	1	A3	ATGTGGCTGGCCGTTCCTTGTAGAC	4	1	A4	AGAGTTTTCCGGCGCCAGTGTTGTT	ATGTGGCTGGCCGTTCCTTGTAGACTTACACTCGGACCTCGTCGACATGCATTCCTGAATCCCACCCATGCTTCTCAGTAACCTCCTAAGTTTCGAGCTGGACTCAGTGAGAGTTTTCCGGCGCCAGTGTTGTT	ATGTGGCTGGCCGTTCCTTGTAGACTTACACTCGGACCTCGTCGACATGCATTCCTGAATCCCACCCATGCTTCTCAGTAACCTCCTAAGTTTCGAGCTGGACTCAGTGAGAGTTTTCCGGCGCCAGTGTTGTTTAGACACACA
ENST00000502732	ENSG00000143322	ABL2	set16	ENSG00000143322	ABL2	-46	9125	9155	31	CGTTTCAGAAGTTCTCACATACTCCTACGGA	0.952151	-54.8785	0.451613	1	1	1	1	1	1	5	1	1	0	3	1	A3	ATGTGGCTGGCCGTTCCTTGTAGAC	4	1	A4	AGAGTTTTCCGGCGCCAGTGTTGTT	ATGTGGCTGGCCGTTCCTTGTAGACTTACACTCGGACCTCGTCGACATGCATTCGTTTCAGAAGTTCTCACATACTCCTACGGACCTCCTAAGTTTCGAGCTGGACTCAGTGAGAGTTTTCCGGCGCCAGTGTTGTT	ATGTGGCTGGCCGTTCCTTGTAGACTTACACTCGGACCTCGTCGACATGCATTCGTTTCAGAAGTTCTCACATACTCCTACGGACCTCCTAAGTTTCGAGCTGGACTCAGTGAGAGTTTTCCGGCGCCAGTGTTGTTAAGCTCG
ENST00000502732	ENSG00000143322	ABL2	set16	ENSG00000143322	ABL2	-46	8971	8998	28	TTGGTCATAGCAGATCCTTAGGGCACAG	0.967849	-52.9785	0.5	1	1	1	1	1	1	5	1	1	0	3	1	A3	ATGTGGCTGGCCGTTCCTTGTAGAC	4	1	A4	AGAGTTTTCCGGCGCCAGTGTTGTT	ATGTGGCTGGCCGTTCCTTGTAGACTTACACTCGGACCTCGTCGACATGCATTTTGGTCATAGCAGATCCTTAGGGCACAGCCTCCTAAGTTTCGAGCTGGACTCAGTGAGAGTTTTCCGGCGCCAGTGTTGTT	ATGTGGCTGGCCGTTCCTTGTAGACTTACACTCGGACCTCGTCGACATGCATTTTGGTCATAGCAGATCCTTAGGGCACAGCCTCCTAAGTTTCGAGCTGGACTCAGTGAGAGTTTTCCGGCGCCAGTGTTGTTCTTACCGCCC
ENST00000502732	ENSG00000143322	ABL2	set16	ENSG00000143322	ABL2	-46	4768	4796	29	CAAGTCCTTGGCCAGTATGTCAGTATGCA	0.952151	-53.8785	0.482759	1	1	1	1	1	1	5	1	1	0	3	1	A3	ATGTGGCTGGCCGTTCCTTGTAGAC	4	1	A4	AGAGTTTTCCGGCGCCAGTGTTGTT	ATGTGGCTGGCCGTTCCTTGTAGACTTACACTCGGACCTCGTCGACATGCATTCAAGTCCTTGGCCAGTATGTCAGTATGCACCTCCTAAGTTTCGAGCTGGACTCAGTGAGAGTTTTCCGGCGCCAGTGTTGTT	ATGTGGCTGGCCGTTCCTTGTAGACTTACACTCGGACCTCGTCGACATGCATTCAAGTCCTTGGCCAGTATGTCAGTATGCACCTCCTAAGTTTCGAGCTGGACTCAGTGAGAGTTTTCCGGCGCCAGTGTTGTTACGCGGCCC
ENST00000502732	ENSG00000143322	ABL2	set16	ENSG00000143322	ABL2	-46	7602	7631	30	GGTACTGATAGTTTTCAGATAGCACTGGGT	0.927849	-53.1785	0.433333	1	1	1	1	1	1	5	1	1	0	3	1	A3	ATGTGGCTGGCCGTTCCTTGTAGAC	4	1	A4	AGAGTTTTCCGGCGCCAGTGTTGTT	ATGTGGCTGGCCGTTCCTTGTAGACTTACACTCGGACCTCGTCGACATGCATTGGTACTGATAGTTTTCAGATAGCACTGGGTCCTCCTAAGTTTCGAGCTGGACTCAGTGAGAGTTTTCCGGCGCCAGTGTTGTT	ATGTGGCTGGCCGTTCCTTGTAGACTTACACTCGGACCTCGTCGACATGCATTGGTACTGATAGTTTTCAGATAGCACTGGGTCCTCCTAAGTTTCGAGCTGGACTCAGTGAGAGTTTTCCGGCGCCAGTGTTGTTGTTCACGA
ENST00000502732	ENSG00000143322	ABL2	set16	ENSG00000143322	ABL2	-46	7103	7136	34	CTGGGACATATTTTACTAGCCAATTTTCAGTTGA	0.992151	-54.4785	0.352941	1	1	1	1	1	1	5	1	1	0	3	1	A3	ATGTGGCTGGCCGTTCCTTGTAGAC	4	1	A4	AGAGTTTTCCGGCGCCAGTGTTGTT	ATGTGGCTGGCCGTTCCTTGTAGACTTACACTCGGACCTCGTCGACATGCATTCTGGGACATATTTTACTAGCCAATTTTCAGTTGACCTCCTAAGTTTCGAGCTGGACTCAGTGAGAGTTTTCCGGCGCCAGTGTTGTT	ATGTGGCTGGCCGTTCCTTGTAGACTTACACTCGGACCTCGTCGACATGCATTCTGGGACATATTTTACTAGCCAATTTTCAGTTGACCTCCTAAGTTTCGAGCTGGACTCAGTGAGAGTTTTCCGGCGCCAGTGTTGTTATAA
ENST00000502732	ENSG00000143322	ABL2	set16	ENSG00000143322	ABL2	-46	6531	6563	33	ATGCTTGTATAGTAAGTTGACAGTGCCTCTTTA	0.982151	-54.8785	0.363636	1	1	1	1	1	1	5	1	1	0	3	1	A3	ATGTGGCTGGCCGTTCCTTGTAGAC	4	1	A4	AGAGTTTTCCGGCGCCAGTGTTGTT	ATGTGGCTGGCCGTTCCTTGTAGACTTACACTCGGACCTCGTCGACATGCATTATGCTTGTATAGTAAGTTGACAGTGCCTCTTTACCTCCTAAGTTTCGAGCTGGACTCAGTGAGAGTTTTCCGGCGCCAGTGTTGTT	ATGTGGCTGGCCGTTCCTTGTAGACTTACACTCGGACCTCGTCGACATGCATTATGCTTGTATAGTAAGTTGACAGTGCCTCTTTACCTCCTAAGTTTCGAGCTGGACTCAGTGAGAGTTTTCCGGCGCCAGTGTTGTTACGAA
ENST00000502732	ENSG00000143322	ABL2	set16	ENSG00000143322	ABL2	-46	6442	6471	30	GTATGCTCCAATAGTCAATGCCACTCTTGA	0.957849	-53.4785	0.433333	1	1	1	1	1	1	5	1	1	0	3	1	A3	ATGTGGCTGGCCGTTCCTTGTAGAC	4	1	A4	AGAGTTTTCCGGCGCCAGTGTTGTT	ATGTGGCTGGCCGTTCCTTGTAGACTTACACTCGGACCTCGTCGACATGCATTGTATGCTCCAATAGTCAATGCCACTCTTGACCTCCTAAGTTTCGAGCTGGACTCAGTGAGAGTTTTCCGGCGCCAGTGTTGTT	ATGTGGCTGGCCGTTCCTTGTAGACTTACACTCGGACCTCGTCGACATGCATTGTATGCTCCAATAGTCAATGCCACTCTTGACCTCCTAAGTTTCGAGCTGGACTCAGTGAGAGTTTTCCGGCGCCAGTGTTGTTGTGTCCGA
ENST00000502732	ENSG00000143322	ABL2	set16	ENSG00000143322	ABL2	-46	10280	10307	28	CTTTGAATCATGACCTGCCACAGGCCTC	0.912151	-54.0785	0.535714	1	1	1	0	1	1	4	1	1	0	3	1	A3	ATGTGGCTGGCCGTTCCTTGTAGAC	4	1	A4	AGAGTTTTCCGGCGCCAGTGTTGTT	ATGTGGCTGGCCGTTCCTTGTAGACTTACACTCGGACCTCGTCGACATGCATTCTTTGAATCATGACCTGCCACAGGCCTCCCTCCTAAGTTTCGAGCTGGACTCAGTGAGAGTTTTCCGGCGCCAGTGTTGTT	ATGTGGCTGGCCGTTCCTTGTAGACTTACACTCGGACCTCGTCGACATGCATTCTTTGAATCATGACCTGCCACAGGCCTCCCTCCTAAGTTTCGAGCTGGACTCAGTGAGAGTTTTCCGGCGCCAGTGTTGTTCGGCATACAG
ENST00000502732	ENSG00000143322	ABL2	set16	ENSG00000143322	ABL2	-46	6054	6086	33	ACGAGTTCTTCAAGTTTACGGACATGTATGATG	0.982151	-54.6785	0.393939	1	1	1	1	1	1	5	1	1	0	3	1	A3	ATGTGGCTGGCCGTTCCTTGTAGAC	4	1	A4	AGAGTTTTCCGGCGCCAGTGTTGTT	ATGTGGCTGGCCGTTCCTTGTAGACTTACACTCGGACCTCGTCGACATGCATTACGAGTTCTTCAAGTTTACGGACATGTATGATGCCTCCTAAGTTTCGAGCTGGACTCAGTGAGAGTTTTCCGGCGCCAGTGTTGTT	ATGTGGCTGGCCGTTCCTTGTAGACTTACACTCGGACCTCGTCGACATGCATTACGAGTTCTTCAAGTTTACGGACATGTATGATGCCTCCTAAGTTTCGAGCTGGACTCAGTGAGAGTTTTCCGGCGCCAGTGTTGTTTCTCG
ENST00000502732	ENSG00000143322	ABL2	set16	ENSG00000143322	ABL2	-46	5913	5937	25	GGTGACATACTGCGGGGATCACCCA	0.967849	-51.8785	0.6	1	1	1	1	1	1	5	1	1	0	3	1	A3	ATGTGGCTGGCCGTTCCTTGTAGAC	4	1	A4	AGAGTTTTCCGGCGCCAGTGTTGTT	ATGTGGCTGGCCGTTCCTTGTAGACTTACACTCGGACCTCGTCGACATGCATTGGTGACATACTGCGGGGATCACCCACCTCCTAAGTTTCGAGCTGGACTCAGTGAGAGTTTTCCGGCGCCAGTGTTGTT	ATGTGGCTGGCCGTTCCTTGTAGACTTACACTCGGACCTCGTCGACATGCATTGGTGACATACTGCGGGGATCACCCACCTCCTAAGTTTCGAGCTGGACTCAGTGAGAGTTTTCCGGCGCCAGTGTTGTTCCGATTGAATTGG
ENST00000502732	ENSG00000143322	ABL2	set16	ENSG00000143322	ABL2	-46	5603	5629	27	TTTCCAGAGAGGCTCTCCAAGGGATAG	0.867849	-52.0785	0.518519	1	1	1	1	1	1	5	1	1	0	3	1	A3	ATGTGGCTGGCCGTTCCTTGTAGAC	4	1	A4	AGAGTTTTCCGGCGCCAGTGTTGTT	ATGTGGCTGGCCGTTCCTTGTAGACTTACACTCGGACCTCGTCGACATGCATTTTTCCAGAGAGGCTCTCCAAGGGATAGCCTCCTAAGTTTCGAGCTGGACTCAGTGAGAGTTTTCCGGCGCCAGTGTTGTT	ATGTGGCTGGCCGTTCCTTGTAGACTTACACTCGGACCTCGTCGACATGCATTTTTCCAGAGAGGCTCTCCAAGGGATAGCCTCCTAAGTTTCGAGCTGGACTCAGTGAGAGTTTTCCGGCGCCAGTGTTGTTATCATATCTTA
ENST00000502732	ENSG00000143322	ABL2	set16	ENSG00000143322	ABL2	-46	5502	5532	31	CTGTGGTTTGACAGTGTATCAATGACAGAGC	0.902151	-55.0785	0.451613	1	1	1	1	1	1	5	1	1	0	3	1	A3	ATGTGGCTGGCCGTTCCTTGTAGAC	4	1	A4	AGAGTTTTCCGGCGCCAGTGTTGTT	ATGTGGCTGGCCGTTCCTTGTAGACTTACACTCGGACCTCGTCGACATGCATTCTGTGGTTTGACAGTGTATCAATGACAGAGCCCTCCTAAGTTTCGAGCTGGACTCAGTGAGAGTTTTCCGGCGCCAGTGTTGTT	ATGTGGCTGGCCGTTCCTTGTAGACTTACACTCGGACCTCGTCGACATGCATTCTGTGGTTTGACAGTGTATCAATGACAGAGCCCTCCTAAGTTTCGAGCTGGACTCAGTGAGAGTTTTCCGGCGCCAGTGTTGTTGGACATG
ENST00000502732	ENSG00000143322	ABL2	set16	ENSG00000143322	ABL2	-46	4955	4983	29	AGAGGAGAATGCCTCTCCCTATTCTCTAC	0.972151	-54.5785	0.482759	1	1	1	1	1	1	5	1	1	0	3	1	A3	ATGTGGCTGGCCGTTCCTTGTAGAC	4	1	A4	AGAGTTTTCCGGCGCCAGTGTTGTT	ATGTGGCTGGCCGTTCCTTGTAGACTTACACTCGGACCTCGTCGACATGCATTAGAGGAGAATGCCTCTCCCTATTCTCTACCCTCCTAAGTTTCGAGCTGGACTCAGTGAGAGTTTTCCGGCGCCAGTGTTGTT	ATGTGGCTGGCCGTTCCTTGTAGACTTACACTCGGACCTCGTCGACATGCATTAGAGGAGAATGCCTCTCCCTATTCTCTACCCTCCTAAGTTTCGAGCTGGACTCAGTGAGAGTTTTCCGGCGCCAGTGTTGTTATAATACCG
ENST00000502732	ENSG00000143322	ABL2	set16	ENSG00000143322	ABL2	-46	4926	4953	28	TGGATTGGGCTTAAGGTGGTAAGGGAAG	0.967849	-52.4785	0.5	1	1	1	1	1	1	5	1	1	0	3	1	A3	ATGTGGCTGGCCGTTCCTTGTAGAC	4	1	A4	AGAGTTTTCCGGCGCCAGTGTTGTT	ATGTGGCTGGCCGTTCCTTGTAGACTTACACTCGGACCTCGTCGACATGCATTTGGATTGGGCTTAAGGTGGTAAGGGAAGCCTCCTAAGTTTCGAGCTGGACTCAGTGAGAGTTTTCCGGCGCCAGTGTTGTT	ATGTGGCTGGCCGTTCCTTGTAGACTTACACTCGGACCTCGTCGACATGCATTTGGATTGGGCTTAAGGTGGTAAGGGAAGCCTCCTAAGTTTCGAGCTGGACTCAGTGAGAGTTTTCCGGCGCCAGTGTTGTTTTCAGGATAT
ENST00000502732	ENSG00000143322	ABL2	set16	ENSG00000143322	ABL2	-46	4865	4893	29	AGCCAGCTTTTCCTCTCAGTCACATACAG	0.997849	-53.8785	0.482759	1	1	1	1	1	1	5	1	1	0	3	1	A3	ATGTGGCTGGCCGTTCCTTGTAGAC	4	1	A4	AGAGTTTTCCGGCGCCAGTGTTGTT	ATGTGGCTGGCCGTTCCTTGTAGACTTACACTCGGACCTCGTCGACATGCATTAGCCAGCTTTTCCTCTCAGTCACATACAGCCTCCTAAGTTTCGAGCTGGACTCAGTGAGAGTTTTCCGGCGCCAGTGTTGTT	ATGTGGCTGGCCGTTCCTTGTAGACTTACACTCGGACCTCGTCGACATGCATTAGCCAGCTTTTCCTCTCAGTCACATACAGCCTCCTAAGTTTCGAGCTGGACTCAGTGAGAGTTTTCCGGCGCCAGTGTTGTTTGGTACGCC
ENST00000502732	ENSG00000143322	ABL2	set16	ENSG00000143322	ABL2	-46	3830	3856	27	TGCATTTTCCCACCAGGCTAACAGTGG	0.907849	-51.5785	0.518519	1	1	1	1	1	1	5	1	1	0	3	1	A3	ATGTGGCTGGCCGTTCCTTGTAGAC	4	1	A4	AGAGTTTTCCGGCGCCAGTGTTGTT	ATGTGGCTGGCCGTTCCTTGTAGACTTACACTCGGACCTCGTCGACATGCATTTGCATTTTCCCACCAGGCTAACAGTGGCCTCCTAAGTTTCGAGCTGGACTCAGTGAGAGTTTTCCGGCGCCAGTGTTGTT	ATGTGGCTGGCCGTTCCTTGTAGACTTACACTCGGACCTCGTCGACATGCATTTGCATTTTCCCACCAGGCTAACAGTGGCCTCCTAAGTTTCGAGCTGGACTCAGTGAGAGTTTTCCGGCGCCAGTGTTGTTCACAGCTTCAA
ENST00000502732	ENSG00000143322	ABL2	set16	ENSG00000143322	ABL2	-46	4387	4416	30	GCATTCAGATAGGGCCATATTTCCCAGTTT	0.967849	-53.0785	0.433333	1	1	1	1	1	1	5	1	1	0	3	1	A3	ATGTGGCTGGCCGTTCCTTGTAGAC	4	1	A4	AGAGTTTTCCGGCGCCAGTGTTGTT	ATGTGGCTGGCCGTTCCTTGTAGACTTACACTCGGACCTCGTCGACATGCATTGCATTCAGATAGGGCCATATTTCCCAGTTTCCTCCTAAGTTTCGAGCTGGACTCAGTGAGAGTTTTCCGGCGCCAGTGTTGTT	ATGTGGCTGGCCGTTCCTTGTAGACTTACACTCGGACCTCGTCGACATGCATTGCATTCAGATAGGGCCATATTTCCCAGTTTCCTCCTAAGTTTCGAGCTGGACTCAGTGAGAGTTTTCCGGCGCCAGTGTTGTTAGGTTTGC
ENST00000502732	ENSG00000143322	ABL2	set16	ENSG00000143322	ABL2	-46	4325	4350	26	GCAGCAATGGCCTTGTGGAAGCAAGG	0.937849	-51.8785	0.576923	1	1	1	1	1	1	5	1	1	0	3	1	A3	ATGTGGCTGGCCGTTCCTTGTAGAC	4	1	A4	AGAGTTTTCCGGCGCCAGTGTTGTT	ATGTGGCTGGCCGTTCCTTGTAGACTTACACTCGGACCTCGTCGACATGCATTGCAGCAATGGCCTTGTGGAAGCAAGGCCTCCTAAGTTTCGAGCTGGACTCAGTGAGAGTTTTCCGGCGCCAGTGTTGTT	ATGTGGCTGGCCGTTCCTTGTAGACTTACACTCGGACCTCGTCGACATGCATTGCAGCAATGGCCTTGTGGAAGCAAGGCCTCCTAAGTTTCGAGCTGGACTCAGTGAGAGTTTTCCGGCGCCAGTGTTGTTTCCCTTAGAATA
ENST00000502732	ENSG00000143322	ABL2	set16	ENSG00000143322	ABL2	-46	4087	4117	31	TGCATTGCCTTCCTTATGACATACACATGTT	0.937849	-52.9785	0.387097	1	1	1	1	1	1	5	1	1	0	3	1	A3	ATGTGGCTGGCCGTTCCTTGTAGAC	4	1	A4	AGAGTTTTCCGGCGCCAGTGTTGTT	ATGTGGCTGGCCGTTCCTTGTAGACTTACACTCGGACCTCGTCGACATGCATTTGCATTGCCTTCCTTATGACATACACATGTTCCTCCTAAGTTTCGAGCTGGACTCAGTGAGAGTTTTCCGGCGCCAGTGTTGTT	ATGTGGCTGGCCGTTCCTTGTAGACTTACACTCGGACCTCGTCGACATGCATTTGCATTGCCTTCCTTATGACATACACATGTTCCTCCTAAGTTTCGAGCTGGACTCAGTGAGAGTTTTCCGGCGCCAGTGTTGTTTCTGTGA
ENST00000502732	ENSG00000143322	ABL2	set16	ENSG00000143322	ABL2	-46	3713	3739	27	AGAAACCTGTAGCTCCTGCAGGCTGAG	0.962151	-53.8785	0.555556	1	1	1	1	1	1	5	1	1	0	3	1	A3	ATGTGGCTGGCCGTTCCTTGTAGAC	4	1	A4	AGAGTTTTCCGGCGCCAGTGTTGTT	ATGTGGCTGGCCGTTCCTTGTAGACTTACACTCGGACCTCGTCGACATGCATTAGAAACCTGTAGCTCCTGCAGGCTGAGCCTCCTAAGTTTCGAGCTGGACTCAGTGAGAGTTTTCCGGCGCCAGTGTTGTT	ATGTGGCTGGCCGTTCCTTGTAGACTTACACTCGGACCTCGTCGACATGCATTAGAAACCTGTAGCTCCTGCAGGCTGAGCCTCCTAAGTTTCGAGCTGGACTCAGTGAGAGTTTTCCGGCGCCAGTGTTGTTCTACCGCTGAA
ENST00000502732	ENSG00000143322	ABL2	set16	ENSG00000143322	ABL2	-46	3653	3683	31	CAAATTTGTTGCGAGTTTGAGGGATGCAGTC	0.952151	-54.2785	0.451613	1	1	1	1	1	1	5	1	1	0	3	1	A3	ATGTGGCTGGCCGTTCCTTGTAGAC	4	1	A4	AGAGTTTTCCGGCGCCAGTGTTGTT	ATGTGGCTGGCCGTTCCTTGTAGACTTACACTCGGACCTCGTCGACATGCATTCAAATTTGTTGCGAGTTTGAGGGATGCAGTCCCTCCTAAGTTTCGAGCTGGACTCAGTGAGAGTTTTCCGGCGCCAGTGTTGTT	ATGTGGCTGGCCGTTCCTTGTAGACTTACACTCGGACCTCGTCGACATGCATTCAAATTTGTTGCGAGTTTGAGGGATGCAGTCCCTCCTAAGTTTCGAGCTGGACTCAGTGAGAGTTTTCCGGCGCCAGTGTTGTTTACCAAG
ENST00000502732	ENSG00000143322	ABL2	set16	ENSG00000143322	ABL2	-46	3398	3423	26	AGAGGCACTTGAGGTGGAGGCATCAC	0.962151	-53.3785	0.576923	1	1	1	1	1	1	5	1	1	0	3	1	A3	ATGTGGCTGGCCGTTCCTTGTAGAC	4	1	A4	AGAGTTTTCCGGCGCCAGTGTTGTT	ATGTGGCTGGCCGTTCCTTGTAGACTTACACTCGGACCTCGTCGACATGCATTAGAGGCACTTGAGGTGGAGGCATCACCCTCCTAAGTTTCGAGCTGGACTCAGTGAGAGTTTTCCGGCGCCAGTGTTGTT	ATGTGGCTGGCCGTTCCTTGTAGACTTACACTCGGACCTCGTCGACATGCATTAGAGGCACTTGAGGTGGAGGCATCACCCTCCTAAGTTTCGAGCTGGACTCAGTGAGAGTTTTCCGGCGCCAGTGTTGTTGTTATTCCGAAG
ENST00000502732	ENSG00000143322	ABL2	set16	ENSG00000143322	ABL2	-46	10433	10460	28	CTGAGAAGCTCGTGTCTACCAGCTCTAG	0.927849	-53.4785	0.535714	1	1	1	0	1	1	4	1	1	0	3	1	A3	ATGTGGCTGGCCGTTCCTTGTAGAC	4	1	A4	AGAGTTTTCCGGCGCCAGTGTTGTT	ATGTGGCTGGCCGTTCCTTGTAGACTTACACTCGGACCTCGTCGACATGCATTCTGAGAAGCTCGTGTCTACCAGCTCTAGCCTCCTAAGTTTCGAGCTGGACTCAGTGAGAGTTTTCCGGCGCCAGTGTTGTT	ATGTGGCTGGCCGTTCCTTGTAGACTTACACTCGGACCTCGTCGACATGCATTCTGAGAAGCTCGTGTCTACCAGCTCTAGCCTCCTAAGTTTCGAGCTGGACTCAGTGAGAGTTTTCCGGCGCCAGTGTTGTTGCTCTGACAC
ENST00000502732	ENSG00000143322	ABL2	set16	ENSG00000143322	ABL2	-46	10369	10398	30	GTCTTTTCCTCTCTGAGACTCATGAAACCC	0.972151	-54.5785	0.466667	1	1	1	0	1	1	4	1	1	0	3	1	A3	ATGTGGCTGGCCGTTCCTTGTAGAC	4	1	A4	AGAGTTTTCCGGCGCCAGTGTTGTT	ATGTGGCTGGCCGTTCCTTGTAGACTTACACTCGGACCTCGTCGACATGCATTGTCTTTTCCTCTCTGAGACTCATGAAACCCCCTCCTAAGTTTCGAGCTGGACTCAGTGAGAGTTTTCCGGCGCCAGTGTTGTT	ATGTGGCTGGCCGTTCCTTGTAGACTTACACTCGGACCTCGTCGACATGCATTGTCTTTTCCTCTCTGAGACTCATGAAACCCCCTCCTAAGTTTCGAGCTGGACTCAGTGAGAGTTTTCCGGCGCCAGTGTTGTTATCTAGAG
ENST00000502732	ENSG00000143322	ABL2	set16	ENSG00000143322	ABL2	-46	6261	6290	30	AGTGTTTCTCCAAGGCTTAGTTCCAGAACT	0.967849	-53.6785	0.433333	1	1	1	1	1	1	5	1	1	0	3	1	A3	ATGTGGCTGGCCGTTCCTTGTAGAC	4	1	A4	AGAGTTTTCCGGCGCCAGTGTTGTT	ATGTGGCTGGCCGTTCCTTGTAGACTTACACTCGGACCTCGTCGACATGCATTAGTGTTTCTCCAAGGCTTAGTTCCAGAACTCCTCCTAAGTTTCGAGCTGGACTCAGTGAGAGTTTTCCGGCGCCAGTGTTGTT	ATGTGGCTGGCCGTTCCTTGTAGACTTACACTCGGACCTCGTCGACATGCATTAGTGTTTCTCCAAGGCTTAGTTCCAGAACTCCTCCTAAGTTTCGAGCTGGACTCAGTGAGAGTTTTCCGGCGCCAGTGTTGTTGTACGCCC
ENST00000683244	ENSG00000130396	AFDN	set16	ENSG00000130396	AFDN	-46	4569	4595	27	GGGTTTAAGGACTGAGTGCGCATCTGG	0.947849	-52.4785	0.555556	1	1	1	0	1	1	4	1	1	0	5	1	A5	TTCAGGGTCTCCGGATGGGGTCATA	6	1	A6	GGTATGTTGCGGACTGCCACTCTGT	TTCAGGGTCTCCGGATGGGGTCATATTACACTCGGACCTCGTCGACATGCATTGGGTTTAAGGACTGAGTGCGCATCTGGCCTCCTAAGTTTCGAGCTGGACTCAGTGGGTATGTTGCGGACTGCCACTCTGT	TTCAGGGTCTCCGGATGGGGTCATATTACACTCGGACCTCGTCGACATGCATTGGGTTTAAGGACTGAGTGCGCATCTGGCCTCCTAAGTTTCGAGCTGGACTCAGTGGGTATGTTGCGGACTGCCACTCTGTGGAGGTTGGGA
ENST00000683244	ENSG00000130396	AFDN	set16	ENSG00000130396	AFDN	-46	7517	7546	30	ATGGCCAAATCCACTTGTGTATGGGTTTCA	0.932151	-53.6785	0.433333	1	1	1	1	1	1	5	1	1	0	5	1	A5	TTCAGGGTCTCCGGATGGGGTCATA	6	1	A6	GGTATGTTGCGGACTGCCACTCTGT	TTCAGGGTCTCCGGATGGGGTCATATTACACTCGGACCTCGTCGACATGCATTATGGCCAAATCCACTTGTGTATGGGTTTCACCTCCTAAGTTTCGAGCTGGACTCAGTGGGTATGTTGCGGACTGCCACTCTGT	TTCAGGGTCTCCGGATGGGGTCATATTACACTCGGACCTCGTCGACATGCATTATGGCCAAATCCACTTGTGTATGGGTTTCACCTCCTAAGTTTCGAGCTGGACTCAGTGGGTATGTTGCGGACTGCCACTCTGTGTATATAG
ENST00000683244	ENSG00000130396	AFDN	set16	ENSG00000130396	AFDN	-46	6300	6327	28	ACGTGCGTCATCACACAGGAAGCTTTGG	0.952151	-53.6785	0.535714	1	1	1	1	1	1	5	1	1	0	5	1	A5	TTCAGGGTCTCCGGATGGGGTCATA	6	1	A6	GGTATGTTGCGGACTGCCACTCTGT	TTCAGGGTCTCCGGATGGGGTCATATTACACTCGGACCTCGTCGACATGCATTACGTGCGTCATCACACAGGAAGCTTTGGCCTCCTAAGTTTCGAGCTGGACTCAGTGGGTATGTTGCGGACTGCCACTCTGT	TTCAGGGTCTCCGGATGGGGTCATATTACACTCGGACCTCGTCGACATGCATTACGTGCGTCATCACACAGGAAGCTTTGGCCTCCTAAGTTTCGAGCTGGACTCAGTGGGTATGTTGCGGACTGCCACTCTGTTCGGCGATGT
ENST00000683244	ENSG00000130396	AFDN	set16	ENSG00000130396	AFDN	-46	7316	7345	30	TGCTTTTCCTAGAACTTCTGCTGCAAGCAA	0.987849	-53.9785	0.433333	1	1	1	1	1	1	5	1	1	0	5	1	A5	TTCAGGGTCTCCGGATGGGGTCATA	6	1	A6	GGTATGTTGCGGACTGCCACTCTGT	TTCAGGGTCTCCGGATGGGGTCATATTACACTCGGACCTCGTCGACATGCATTTGCTTTTCCTAGAACTTCTGCTGCAAGCAACCTCCTAAGTTTCGAGCTGGACTCAGTGGGTATGTTGCGGACTGCCACTCTGT	TTCAGGGTCTCCGGATGGGGTCATATTACACTCGGACCTCGTCGACATGCATTTGCTTTTCCTAGAACTTCTGCTGCAAGCAACCTCCTAAGTTTCGAGCTGGACTCAGTGGGTATGTTGCGGACTGCCACTCTGTTATTCGGG
ENST00000683244	ENSG00000130396	AFDN	set16	ENSG00000130396	AFDN	-46	6680	6710	31	TGTAACTGAATTCCTTCCTTGACGGCATACA	0.942151	-54.4785	0.419355	1	1	1	1	1	1	5	1	1	0	5	1	A5	TTCAGGGTCTCCGGATGGGGTCATA	6	1	A6	GGTATGTTGCGGACTGCCACTCTGT	TTCAGGGTCTCCGGATGGGGTCATATTACACTCGGACCTCGTCGACATGCATTTGTAACTGAATTCCTTCCTTGACGGCATACACCTCCTAAGTTTCGAGCTGGACTCAGTGGGTATGTTGCGGACTGCCACTCTGT	TTCAGGGTCTCCGGATGGGGTCATATTACACTCGGACCTCGTCGACATGCATTTGTAACTGAATTCCTTCCTTGACGGCATACACCTCCTAAGTTTCGAGCTGGACTCAGTGGGTATGTTGCGGACTGCCACTCTGTGGGGAGA
ENST00000683244	ENSG00000130396	AFDN	set16	ENSG00000130396	AFDN	-46	6576	6605	30	CCATTCTTCTGTCATTCCCAGTCACATGAA	0.937849	-52.9785	0.433333	1	1	1	1	1	1	5	1	1	0	5	1	A5	TTCAGGGTCTCCGGATGGGGTCATA	6	1	A6	GGTATGTTGCGGACTGCCACTCTGT	TTCAGGGTCTCCGGATGGGGTCATATTACACTCGGACCTCGTCGACATGCATTCCATTCTTCTGTCATTCCCAGTCACATGAACCTCCTAAGTTTCGAGCTGGACTCAGTGGGTATGTTGCGGACTGCCACTCTGT	TTCAGGGTCTCCGGATGGGGTCATATTACACTCGGACCTCGTCGACATGCATTCCATTCTTCTGTCATTCCCAGTCACATGAACCTCCTAAGTTTCGAGCTGGACTCAGTGGGTATGTTGCGGACTGCCACTCTGTATTATTGG
ENST00000683244	ENSG00000130396	AFDN	set16	ENSG00000130396	AFDN	-46	4459	4488	30	ATGTTCTTCTCTCTTTCTCCGTTCAGCAGC	0.962151	-54.8785	0.466667	1	1	1	0	1	1	4	1	1	0	5	1	A5	TTCAGGGTCTCCGGATGGGGTCATA	6	1	A6	GGTATGTTGCGGACTGCCACTCTGT	TTCAGGGTCTCCGGATGGGGTCATATTACACTCGGACCTCGTCGACATGCATTATGTTCTTCTCTCTTTCTCCGTTCAGCAGCCCTCCTAAGTTTCGAGCTGGACTCAGTGGGTATGTTGCGGACTGCCACTCTGT	TTCAGGGTCTCCGGATGGGGTCATATTACACTCGGACCTCGTCGACATGCATTATGTTCTTCTCTCTTTCTCCGTTCAGCAGCCCTCCTAAGTTTCGAGCTGGACTCAGTGGGTATGTTGCGGACTGCCACTCTGTGCCCTTGC
ENST00000683244	ENSG00000130396	AFDN	set16	ENSG00000130396	AFDN	-46	6052	6077	26	GGTCGATGATGAGGGGAAGATGGGAG	0.907849	-51.8785	0.576923	1	1	1	1	1	1	5	1	1	0	5	1	A5	TTCAGGGTCTCCGGATGGGGTCATA	6	1	A6	GGTATGTTGCGGACTGCCACTCTGT	TTCAGGGTCTCCGGATGGGGTCATATTACACTCGGACCTCGTCGACATGCATTGGTCGATGATGAGGGGAAGATGGGAGCCTCCTAAGTTTCGAGCTGGACTCAGTGGGTATGTTGCGGACTGCCACTCTGT	TTCAGGGTCTCCGGATGGGGTCATATTACACTCGGACCTCGTCGACATGCATTGGTCGATGATGAGGGGAAGATGGGAGCCTCCTAAGTTTCGAGCTGGACTCAGTGGGTATGTTGCGGACTGCCACTCTGTGCGCCAGGGGCA
ENST00000683244	ENSG00000130396	AFDN	set16	ENSG00000130396	AFDN	-46	5770	5800	31	CTTTTCCTCTTCAAACTCGCACCTACAAACC	0.992151	-54.0785	0.451613	1	1	1	1	1	1	5	1	1	0	5	1	A5	TTCAGGGTCTCCGGATGGGGTCATA	6	1	A6	GGTATGTTGCGGACTGCCACTCTGT	TTCAGGGTCTCCGGATGGGGTCATATTACACTCGGACCTCGTCGACATGCATTCTTTTCCTCTTCAAACTCGCACCTACAAACCCCTCCTAAGTTTCGAGCTGGACTCAGTGGGTATGTTGCGGACTGCCACTCTGT	TTCAGGGTCTCCGGATGGGGTCATATTACACTCGGACCTCGTCGACATGCATTCTTTTCCTCTTCAAACTCGCACCTACAAACCCCTCCTAAGTTTCGAGCTGGACTCAGTGGGTATGTTGCGGACTGCCACTCTGTTTTTTAG
ENST00000683244	ENSG00000130396	AFDN	set16	ENSG00000130396	AFDN	-46	4490	4516	27	GGGCCTTCTCCTTCTCATACCAACGCT	0.952151	-53.6785	0.555556	1	1	1	0	1	1	4	1	1	0	5	1	A5	TTCAGGGTCTCCGGATGGGGTCATA	6	1	A6	GGTATGTTGCGGACTGCCACTCTGT	TTCAGGGTCTCCGGATGGGGTCATATTACACTCGGACCTCGTCGACATGCATTGGGCCTTCTCCTTCTCATACCAACGCTCCTCCTAAGTTTCGAGCTGGACTCAGTGGGTATGTTGCGGACTGCCACTCTGT	TTCAGGGTCTCCGGATGGGGTCATATTACACTCGGACCTCGTCGACATGCATTGGGCCTTCTCCTTCTCATACCAACGCTCCTCCTAAGTTTCGAGCTGGACTCAGTGGGTATGTTGCGGACTGCCACTCTGTCCTCCTAGCTT
ENST00000683244	ENSG00000130396	AFDN	set16	ENSG00000130396	AFDN	-46	4106	4132	27	CCATAGCTGCCTCTATTCGATGCCGCT	0.977849	-53.0785	0.555556	1	1	1	0	1	1	4	1	1	0	5	1	A5	TTCAGGGTCTCCGGATGGGGTCATA	6	1	A6	GGTATGTTGCGGACTGCCACTCTGT	TTCAGGGTCTCCGGATGGGGTCATATTACACTCGGACCTCGTCGACATGCATTCCATAGCTGCCTCTATTCGATGCCGCTCCTCCTAAGTTTCGAGCTGGACTCAGTGGGTATGTTGCGGACTGCCACTCTGT	TTCAGGGTCTCCGGATGGGGTCATATTACACTCGGACCTCGTCGACATGCATTCCATAGCTGCCTCTATTCGATGCCGCTCCTCCTAAGTTTCGAGCTGGACTCAGTGGGTATGTTGCGGACTGCCACTCTGTTTCCCCTCTTG
ENST00000683244	ENSG00000130396	AFDN	set16	ENSG00000130396	AFDN	-46	4071	4104	34	AAGTTGGTAAGCTTTATCTTCTCGAAGTTCTTCT	0.987849	-55.1785	0.352941	1	1	1	0	1	1	4	1	1	0	5	1	A5	TTCAGGGTCTCCGGATGGGGTCATA	6	1	A6	GGTATGTTGCGGACTGCCACTCTGT	TTCAGGGTCTCCGGATGGGGTCATATTACACTCGGACCTCGTCGACATGCATTAAGTTGGTAAGCTTTATCTTCTCGAAGTTCTTCTCCTCCTAAGTTTCGAGCTGGACTCAGTGGGTATGTTGCGGACTGCCACTCTGT	TTCAGGGTCTCCGGATGGGGTCATATTACACTCGGACCTCGTCGACATGCATTAAGTTGGTAAGCTTTATCTTCTCGAAGTTCTTCTCCTCCTAAGTTTCGAGCTGGACTCAGTGGGTATGTTGCGGACTGCCACTCTGTGGCT
ENST00000683244	ENSG00000130396	AFDN	set16	ENSG00000130396	AFDN	-46	3977	4006	30	TTTCCTCATAATTTGGCCACTGGTTCTGAG	0.917849	-52.6785	0.433333	1	1	1	0	1	1	4	1	1	0	5	1	A5	TTCAGGGTCTCCGGATGGGGTCATA	6	1	A6	GGTATGTTGCGGACTGCCACTCTGT	TTCAGGGTCTCCGGATGGGGTCATATTACACTCGGACCTCGTCGACATGCATTTTTCCTCATAATTTGGCCACTGGTTCTGAGCCTCCTAAGTTTCGAGCTGGACTCAGTGGGTATGTTGCGGACTGCCACTCTGT	TTCAGGGTCTCCGGATGGGGTCATATTACACTCGGACCTCGTCGACATGCATTTTTCCTCATAATTTGGCCACTGGTTCTGAGCCTCCTAAGTTTCGAGCTGGACTCAGTGGGTATGTTGCGGACTGCCACTCTGTCCGCATCC
ENST00000683244	ENSG00000130396	AFDN	set16	ENSG00000130396	AFDN	-46	3893	3917	25	GTCTGAGTGGGGATGGGGTAGGCTT	0.977849	-52.1785	0.6	1	1	1	0	1	1	4	1	1	0	5	1	A5	TTCAGGGTCTCCGGATGGGGTCATA	6	1	A6	GGTATGTTGCGGACTGCCACTCTGT	TTCAGGGTCTCCGGATGGGGTCATATTACACTCGGACCTCGTCGACATGCATTGTCTGAGTGGGGATGGGGTAGGCTTCCTCCTAAGTTTCGAGCTGGACTCAGTGGGTATGTTGCGGACTGCCACTCTGT	TTCAGGGTCTCCGGATGGGGTCATATTACACTCGGACCTCGTCGACATGCATTGTCTGAGTGGGGATGGGGTAGGCTTCCTCCTAAGTTTCGAGCTGGACTCAGTGGGTATGTTGCGGACTGCCACTCTGTAGGACGCTCCATC
ENST00000683244	ENSG00000130396	AFDN	set16	ENSG00000130396	AFDN	-46	3808	3837	30	TGTTATCTTCGCTGTTGTTCCAGAGGCATA	0.977849	-53.6785	0.433333	1	1	1	0	1	1	4	1	1	0	5	1	A5	TTCAGGGTCTCCGGATGGGGTCATA	6	1	A6	GGTATGTTGCGGACTGCCACTCTGT	TTCAGGGTCTCCGGATGGGGTCATATTACACTCGGACCTCGTCGACATGCATTTGTTATCTTCGCTGTTGTTCCAGAGGCATACCTCCTAAGTTTCGAGCTGGACTCAGTGGGTATGTTGCGGACTGCCACTCTGT	TTCAGGGTCTCCGGATGGGGTCATATTACACTCGGACCTCGTCGACATGCATTTGTTATCTTCGCTGTTGTTCCAGAGGCATACCTCCTAAGTTTCGAGCTGGACTCAGTGGGTATGTTGCGGACTGCCACTCTGTCTTCTTCA
ENST00000683244	ENSG00000130396	AFDN	set16	ENSG00000130396	AFDN	-46	3781	3806	26	GCACTTTTCCCTCCAGGACTAGGAGG	0.907849	-51.9785	0.576923	1	1	1	0	1	1	4	1	1	0	5	1	A5	TTCAGGGTCTCCGGATGGGGTCATA	6	1	A6	GGTATGTTGCGGACTGCCACTCTGT	TTCAGGGTCTCCGGATGGGGTCATATTACACTCGGACCTCGTCGACATGCATTGCACTTTTCCCTCCAGGACTAGGAGGCCTCCTAAGTTTCGAGCTGGACTCAGTGGGTATGTTGCGGACTGCCACTCTGT	TTCAGGGTCTCCGGATGGGGTCATATTACACTCGGACCTCGTCGACATGCATTGCACTTTTCCCTCCAGGACTAGGAGGCCTCCTAAGTTTCGAGCTGGACTCAGTGGGTATGTTGCGGACTGCCACTCTGTACACAGGTGTGA
ENST00000683244	ENSG00000130396	AFDN	set16	ENSG00000130396	AFDN	-46	3753	3779	27	TGATTTGCTACGTTGGGGCTGGAACGG	0.997849	-52.5785	0.555556	1	1	1	0	1	1	4	1	1	0	5	1	A5	TTCAGGGTCTCCGGATGGGGTCATA	6	1	A6	GGTATGTTGCGGACTGCCACTCTGT	TTCAGGGTCTCCGGATGGGGTCATATTACACTCGGACCTCGTCGACATGCATTTGATTTGCTACGTTGGGGCTGGAACGGCCTCCTAAGTTTCGAGCTGGACTCAGTGGGTATGTTGCGGACTGCCACTCTGT	TTCAGGGTCTCCGGATGGGGTCATATTACACTCGGACCTCGTCGACATGCATTTGATTTGCTACGTTGGGGCTGGAACGGCCTCCTAAGTTTCGAGCTGGACTCAGTGGGTATGTTGCGGACTGCCACTCTGTTCCTTGATCTC
ENST00000683244	ENSG00000130396	AFDN	set16	ENSG00000130396	AFDN	-46	3719	3751	33	GATCAGCTCTATTTTTCATCAGTCTGTCATCAC	0.922151	-55.8785	0.393939	1	1	1	0	1	1	4	1	1	0	5	1	A5	TTCAGGGTCTCCGGATGGGGTCATA	6	1	A6	GGTATGTTGCGGACTGCCACTCTGT	TTCAGGGTCTCCGGATGGGGTCATATTACACTCGGACCTCGTCGACATGCATTGATCAGCTCTATTTTTCATCAGTCTGTCATCACCCTCCTAAGTTTCGAGCTGGACTCAGTGGGTATGTTGCGGACTGCCACTCTGT	TTCAGGGTCTCCGGATGGGGTCATATTACACTCGGACCTCGTCGACATGCATTGATCAGCTCTATTTTTCATCAGTCTGTCATCACCCTCCTAAGTTTCGAGCTGGACTCAGTGGGTATGTTGCGGACTGCCACTCTGTTTTAA
ENST00000683244	ENSG00000130396	AFDN	set16	ENSG00000130396	AFDN	-46	3686	3717	32	AGGCAATTTCTTTGGTTCACTATATTCTGCCC	0.912151	-54.8785	0.40625	1	1	1	0	1	1	4	1	1	0	5	1	A5	TTCAGGGTCTCCGGATGGGGTCATA	6	1	A6	GGTATGTTGCGGACTGCCACTCTGT	TTCAGGGTCTCCGGATGGGGTCATATTACACTCGGACCTCGTCGACATGCATTAGGCAATTTCTTTGGTTCACTATATTCTGCCCCCTCCTAAGTTTCGAGCTGGACTCAGTGGGTATGTTGCGGACTGCCACTCTGT	TTCAGGGTCTCCGGATGGGGTCATATTACACTCGGACCTCGTCGACATGCATTAGGCAATTTCTTTGGTTCACTATATTCTGCCCCCTCCTAAGTTTCGAGCTGGACTCAGTGGGTATGTTGCGGACTGCCACTCTGTTTGTCC
ENST00000683244	ENSG00000130396	AFDN	set16	ENSG00000130396	AFDN	-46	3595	3621	27	ACTCTTTGGTCGGGGTTTACCTGAGCC	0.952151	-53.3785	0.555556	1	1	1	0	1	1	4	1	1	0	5	1	A5	TTCAGGGTCTCCGGATGGGGTCATA	6	1	A6	GGTATGTTGCGGACTGCCACTCTGT	TTCAGGGTCTCCGGATGGGGTCATATTACACTCGGACCTCGTCGACATGCATTACTCTTTGGTCGGGGTTTACCTGAGCCCCTCCTAAGTTTCGAGCTGGACTCAGTGGGTATGTTGCGGACTGCCACTCTGT	TTCAGGGTCTCCGGATGGGGTCATATTACACTCGGACCTCGTCGACATGCATTACTCTTTGGTCGGGGTTTACCTGAGCCCCTCCTAAGTTTCGAGCTGGACTCAGTGGGTATGTTGCGGACTGCCACTCTGTCAACGGCGACC
ENST00000683244	ENSG00000130396	AFDN	set16	ENSG00000130396	AFDN	-46	4410	4433	24	ATCTGGTTGGCGGAAGGGGGTGGT	0.947849	-51.1785	0.625	1	1	1	0	1	1	4	1	1	0	5	1	A5	TTCAGGGTCTCCGGATGGGGTCATA	6	1	A6	GGTATGTTGCGGACTGCCACTCTGT	TTCAGGGTCTCCGGATGGGGTCATATTACACTCGGACCTCGTCGACATGCATTATCTGGTTGGCGGAAGGGGGTGGTCCTCCTAAGTTTCGAGCTGGACTCAGTGGGTATGTTGCGGACTGCCACTCTGT	TTCAGGGTCTCCGGATGGGGTCATATTACACTCGGACCTCGTCGACATGCATTATCTGGTTGGCGGAAGGGGGTGGTCCTCCTAAGTTTCGAGCTGGACTCAGTGGGTATGTTGCGGACTGCCACTCTGTCTCGCCGCTTTCGT
ENST00000683244	ENSG00000130396	AFDN	set16	ENSG00000130396	AFDN	-46	4251	4277	27	GTTTTCCAACGGCCAGGGCCACTTTTG	0.957849	-51.8785	0.555556	1	1	1	0	1	1	4	1	1	0	5	1	A5	TTCAGGGTCTCCGGATGGGGTCATA	6	1	A6	GGTATGTTGCGGACTGCCACTCTGT	TTCAGGGTCTCCGGATGGGGTCATATTACACTCGGACCTCGTCGACATGCATTGTTTTCCAACGGCCAGGGCCACTTTTGCCTCCTAAGTTTCGAGCTGGACTCAGTGGGTATGTTGCGGACTGCCACTCTGT	TTCAGGGTCTCCGGATGGGGTCATATTACACTCGGACCTCGTCGACATGCATTGTTTTCCAACGGCCAGGGCCACTTTTGCCTCCTAAGTTTCGAGCTGGACTCAGTGGGTATGTTGCGGACTGCCACTCTGTGTCTGCTGGGA
ENST00000683244	ENSG00000130396	AFDN	set16	ENSG00000130396	AFDN	-46	4196	4223	28	TTAGAGGAATGGTTCAGATGCTCCTGGC	0.997849	-53.4785	0.5	1	1	1	0	1	1	4	1	1	0	5	1	A5	TTCAGGGTCTCCGGATGGGGTCATA	6	1	A6	GGTATGTTGCGGACTGCCACTCTGT	TTCAGGGTCTCCGGATGGGGTCATATTACACTCGGACCTCGTCGACATGCATTTTAGAGGAATGGTTCAGATGCTCCTGGCCCTCCTAAGTTTCGAGCTGGACTCAGTGGGTATGTTGCGGACTGCCACTCTGT	TTCAGGGTCTCCGGATGGGGTCATATTACACTCGGACCTCGTCGACATGCATTTTAGAGGAATGGTTCAGATGCTCCTGGCCCTCCTAAGTTTCGAGCTGGACTCAGTGGGTATGTTGCGGACTGCCACTCTGTCCATCTTGGG
ENST00000683244	ENSG00000130396	AFDN	set16	ENSG00000130396	AFDN	-46	3275	3304	30	TAAGGCCCATTCCATTCTGCTTTTTTAGGG	0.917849	-52.3785	0.433333	1	1	1	0	1	1	4	1	1	0	5	1	A5	TTCAGGGTCTCCGGATGGGGTCATA	6	1	A6	GGTATGTTGCGGACTGCCACTCTGT	TTCAGGGTCTCCGGATGGGGTCATATTACACTCGGACCTCGTCGACATGCATTTAAGGCCCATTCCATTCTGCTTTTTTAGGGCCTCCTAAGTTTCGAGCTGGACTCAGTGGGTATGTTGCGGACTGCCACTCTGT	TTCAGGGTCTCCGGATGGGGTCATATTACACTCGGACCTCGTCGACATGCATTTAAGGCCCATTCCATTCTGCTTTTTTAGGGCCTCCTAAGTTTCGAGCTGGACTCAGTGGGTATGTTGCGGACTGCCACTCTGTCGGGATCG
ENST00000683244	ENSG00000130396	AFDN	set16	ENSG00000130396	AFDN	-46	3242	3273	32	CACAGTGATTATTTCAGGTTCTTTCCTCAGAG	0.917849	-53.5785	0.40625	1	1	1	0	1	1	4	1	1	0	5	1	A5	TTCAGGGTCTCCGGATGGGGTCATA	6	1	A6	GGTATGTTGCGGACTGCCACTCTGT	TTCAGGGTCTCCGGATGGGGTCATATTACACTCGGACCTCGTCGACATGCATTCACAGTGATTATTTCAGGTTCTTTCCTCAGAGCCTCCTAAGTTTCGAGCTGGACTCAGTGGGTATGTTGCGGACTGCCACTCTGT	TTCAGGGTCTCCGGATGGGGTCATATTACACTCGGACCTCGTCGACATGCATTCACAGTGATTATTTCAGGTTCTTTCCTCAGAGCCTCCTAAGTTTCGAGCTGGACTCAGTGGGTATGTTGCGGACTGCCACTCTGTGCATTA
ENST00000683244	ENSG00000130396	AFDN	set16	ENSG00000130396	AFDN	-46	3215	3240	26	CTGAGCCAGCTCTGTGTTCTCACGCA	0.937849	-52.6785	0.576923	1	1	1	0	1	1	4	1	1	0	5	1	A5	TTCAGGGTCTCCGGATGGGGTCATA	6	1	A6	GGTATGTTGCGGACTGCCACTCTGT	TTCAGGGTCTCCGGATGGGGTCATATTACACTCGGACCTCGTCGACATGCATTCTGAGCCAGCTCTGTGTTCTCACGCACCTCCTAAGTTTCGAGCTGGACTCAGTGGGTATGTTGCGGACTGCCACTCTGT	TTCAGGGTCTCCGGATGGGGTCATATTACACTCGGACCTCGTCGACATGCATTCTGAGCCAGCTCTGTGTTCTCACGCACCTCCTAAGTTTCGAGCTGGACTCAGTGGGTATGTTGCGGACTGCCACTCTGTTTAAGGGGCTTT
ENST00000683244	ENSG00000130396	AFDN	set16	ENSG00000130396	AFDN	-46	3150	3177	28	TGTCCAAGTACCTGGTGAACGTGTGTGA	0.962151	-53.4785	0.5	1	1	1	0	1	1	4	1	1	0	5	1	A5	TTCAGGGTCTCCGGATGGGGTCATA	6	1	A6	GGTATGTTGCGGACTGCCACTCTGT	TTCAGGGTCTCCGGATGGGGTCATATTACACTCGGACCTCGTCGACATGCATTTGTCCAAGTACCTGGTGAACGTGTGTGACCTCCTAAGTTTCGAGCTGGACTCAGTGGGTATGTTGCGGACTGCCACTCTGT	TTCAGGGTCTCCGGATGGGGTCATATTACACTCGGACCTCGTCGACATGCATTTGTCCAAGTACCTGGTGAACGTGTGTGACCTCCTAAGTTTCGAGCTGGACTCAGTGGGTATGTTGCGGACTGCCACTCTGTCGGTAGATTG
ENST00000683244	ENSG00000130396	AFDN	set16	ENSG00000130396	AFDN	-46	2770	2795	26	GTCGTTGCCTGCACGATCCTGCTCAG	0.982151	-53.2785	0.615385	1	1	1	0	1	1	4	1	1	0	5	1	A5	TTCAGGGTCTCCGGATGGGGTCATA	6	1	A6	GGTATGTTGCGGACTGCCACTCTGT	TTCAGGGTCTCCGGATGGGGTCATATTACACTCGGACCTCGTCGACATGCATTGTCGTTGCCTGCACGATCCTGCTCAGCCTCCTAAGTTTCGAGCTGGACTCAGTGGGTATGTTGCGGACTGCCACTCTGT	TTCAGGGTCTCCGGATGGGGTCATATTACACTCGGACCTCGTCGACATGCATTGTCGTTGCCTGCACGATCCTGCTCAGCCTCCTAAGTTTCGAGCTGGACTCAGTGGGTATGTTGCGGACTGCCACTCTGTTTATTAATGGGT
ENST00000683244	ENSG00000130396	AFDN	set16	ENSG00000130396	AFDN	-46	2744	2768	25	TGACAGTCCGCAGCCAGTTCCAGCC	0.882151	-53.8785	0.64	1	1	1	0	1	1	4	1	1	0	5	1	A5	TTCAGGGTCTCCGGATGGGGTCATA	6	1	A6	GGTATGTTGCGGACTGCCACTCTGT	TTCAGGGTCTCCGGATGGGGTCATATTACACTCGGACCTCGTCGACATGCATTTGACAGTCCGCAGCCAGTTCCAGCCCCTCCTAAGTTTCGAGCTGGACTCAGTGGGTATGTTGCGGACTGCCACTCTGT	TTCAGGGTCTCCGGATGGGGTCATATTACACTCGGACCTCGTCGACATGCATTTGACAGTCCGCAGCCAGTTCCAGCCCCTCCTAAGTTTCGAGCTGGACTCAGTGGGTATGTTGCGGACTGCCACTCTGTAAGAACCGACGAT
ENST00000683244	ENSG00000130396	AFDN	set16	ENSG00000130396	AFDN	-46	2715	2742	28	CTGCTTCTCAGCCCAGGCTTCAATATGG	0.962151	-53.6785	0.535714	1	1	1	0	1	1	4	1	1	0	5	1	A5	TTCAGGGTCTCCGGATGGGGTCATA	6	1	A6	GGTATGTTGCGGACTGCCACTCTGT	TTCAGGGTCTCCGGATGGGGTCATATTACACTCGGACCTCGTCGACATGCATTCTGCTTCTCAGCCCAGGCTTCAATATGGCCTCCTAAGTTTCGAGCTGGACTCAGTGGGTATGTTGCGGACTGCCACTCTGT	TTCAGGGTCTCCGGATGGGGTCATATTACACTCGGACCTCGTCGACATGCATTCTGCTTCTCAGCCCAGGCTTCAATATGGCCTCCTAAGTTTCGAGCTGGACTCAGTGGGTATGTTGCGGACTGCCACTCTGTTCCCGTGTGC
ENST00000683244	ENSG00000130396	AFDN	set16	ENSG00000130396	AFDN	-46	2687	2713	27	CCAACTGCTGACGGATAATCGCACCCC	0.882151	-53.9785	0.592593	1	1	1	1	0	1	4	1	1	0	5	1	A5	TTCAGGGTCTCCGGATGGGGTCATA	6	1	A6	GGTATGTTGCGGACTGCCACTCTGT	TTCAGGGTCTCCGGATGGGGTCATATTACACTCGGACCTCGTCGACATGCATTCCAACTGCTGACGGATAATCGCACCCCCCTCCTAAGTTTCGAGCTGGACTCAGTGGGTATGTTGCGGACTGCCACTCTGT	TTCAGGGTCTCCGGATGGGGTCATATTACACTCGGACCTCGTCGACATGCATTCCAACTGCTGACGGATAATCGCACCCCCCTCCTAAGTTTCGAGCTGGACTCAGTGGGTATGTTGCGGACTGCCACTCTGTGCTTATCTACC
ENST00000683244	ENSG00000130396	AFDN	set16	ENSG00000130396	AFDN	-46	2660	2685	26	GTAATGGGAGCACAGCCCCGAATCTG	0.897849	-51.5785	0.576923	1	1	1	1	0	1	4	1	1	0	5	1	A5	TTCAGGGTCTCCGGATGGGGTCATA	6	1	A6	GGTATGTTGCGGACTGCCACTCTGT	TTCAGGGTCTCCGGATGGGGTCATATTACACTCGGACCTCGTCGACATGCATTGTAATGGGAGCACAGCCCCGAATCTGCCTCCTAAGTTTCGAGCTGGACTCAGTGGGTATGTTGCGGACTGCCACTCTGT	TTCAGGGTCTCCGGATGGGGTCATATTACACTCGGACCTCGTCGACATGCATTGTAATGGGAGCACAGCCCCGAATCTGCCTCCTAAGTTTCGAGCTGGACTCAGTGGGTATGTTGCGGACTGCCACTCTGTATTATTGACGCC
ENST00000683244	ENSG00000130396	AFDN	set16	ENSG00000130396	AFDN	-46	2573	2597	25	TGGATGGTCAGGGCGGCATTGACTC	0.957849	-51.9785	0.6	1	1	1	0	1	1	4	1	1	0	5	1	A5	TTCAGGGTCTCCGGATGGGGTCATA	6	1	A6	GGTATGTTGCGGACTGCCACTCTGT	TTCAGGGTCTCCGGATGGGGTCATATTACACTCGGACCTCGTCGACATGCATTTGGATGGTCAGGGCGGCATTGACTCCCTCCTAAGTTTCGAGCTGGACTCAGTGGGTATGTTGCGGACTGCCACTCTGT	TTCAGGGTCTCCGGATGGGGTCATATTACACTCGGACCTCGTCGACATGCATTTGGATGGTCAGGGCGGCATTGACTCCCTCCTAAGTTTCGAGCTGGACTCAGTGGGTATGTTGCGGACTGCCACTCTGTTGGGGTTGGTACC
ENST00000683244	ENSG00000130396	AFDN	set16	ENSG00000130396	AFDN	-46	2515	2544	30	TGTGAGCGTGTGCAGCACATCATCTATTTT	0.987849	-53.6785	0.433333	1	1	1	0	1	1	4	1	1	0	5	1	A5	TTCAGGGTCTCCGGATGGGGTCATA	6	1	A6	GGTATGTTGCGGACTGCCACTCTGT	TTCAGGGTCTCCGGATGGGGTCATATTACACTCGGACCTCGTCGACATGCATTTGTGAGCGTGTGCAGCACATCATCTATTTTCCTCCTAAGTTTCGAGCTGGACTCAGTGGGTATGTTGCGGACTGCCACTCTGT	TTCAGGGTCTCCGGATGGGGTCATATTACACTCGGACCTCGTCGACATGCATTTGTGAGCGTGTGCAGCACATCATCTATTTTCCTCCTAAGTTTCGAGCTGGACTCAGTGGGTATGTTGCGGACTGCCACTCTGTGGCATTTG
ENST00000683244	ENSG00000130396	AFDN	set16	ENSG00000130396	AFDN	-46	2487	2513	27	GGTCGTTGCAGACTGTTCTCTTCAGGG	0.927849	-52.5785	0.555556	1	1	1	0	1	1	4	1	1	0	5	1	A5	TTCAGGGTCTCCGGATGGGGTCATA	6	1	A6	GGTATGTTGCGGACTGCCACTCTGT	TTCAGGGTCTCCGGATGGGGTCATATTACACTCGGACCTCGTCGACATGCATTGGTCGTTGCAGACTGTTCTCTTCAGGGCCTCCTAAGTTTCGAGCTGGACTCAGTGGGTATGTTGCGGACTGCCACTCTGT	TTCAGGGTCTCCGGATGGGGTCATATTACACTCGGACCTCGTCGACATGCATTGGTCGTTGCAGACTGTTCTCTTCAGGGCCTCCTAAGTTTCGAGCTGGACTCAGTGGGTATGTTGCGGACTGCCACTCTGTAAACGAGCTAA
ENST00000683244	ENSG00000130396	AFDN	set16	ENSG00000130396	AFDN	-46	2353	2380	28	GTGTGATCCGACTAAGGTCTCGGTCTTG	0.957849	-53.1785	0.535714	1	1	1	0	1	1	4	1	1	0	5	1	A5	TTCAGGGTCTCCGGATGGGGTCATA	6	1	A6	GGTATGTTGCGGACTGCCACTCTGT	TTCAGGGTCTCCGGATGGGGTCATATTACACTCGGACCTCGTCGACATGCATTGTGTGATCCGACTAAGGTCTCGGTCTTGCCTCCTAAGTTTCGAGCTGGACTCAGTGGGTATGTTGCGGACTGCCACTCTGT	TTCAGGGTCTCCGGATGGGGTCATATTACACTCGGACCTCGTCGACATGCATTGTGTGATCCGACTAAGGTCTCGGTCTTGCCTCCTAAGTTTCGAGCTGGACTCAGTGGGTATGTTGCGGACTGCCACTCTGTCACCGTTATA
ENST00000683244	ENSG00000130396	AFDN	set16	ENSG00000130396	AFDN	-46	2260	2289	30	CTTCTGTTTCTGGTCAACCTGGTCTACTTC	0.987849	-53.8785	0.466667	1	1	1	0	1	1	4	1	1	0	5	1	A5	TTCAGGGTCTCCGGATGGGGTCATA	6	1	A6	GGTATGTTGCGGACTGCCACTCTGT	TTCAGGGTCTCCGGATGGGGTCATATTACACTCGGACCTCGTCGACATGCATTCTTCTGTTTCTGGTCAACCTGGTCTACTTCCCTCCTAAGTTTCGAGCTGGACTCAGTGGGTATGTTGCGGACTGCCACTCTGT	TTCAGGGTCTCCGGATGGGGTCATATTACACTCGGACCTCGTCGACATGCATTCTTCTGTTTCTGGTCAACCTGGTCTACTTCCCTCCTAAGTTTCGAGCTGGACTCAGTGGGTATGTTGCGGACTGCCACTCTGTCGCCTTGG
ENST00000683244	ENSG00000130396	AFDN	set16	ENSG00000130396	AFDN	-46	5080	5107	28	GCTTGCGCATCTCTTCTAACTGCTGCTG	0.987849	-53.7785	0.535714	1	1	1	0	1	1	4	1	1	0	5	1	A5	TTCAGGGTCTCCGGATGGGGTCATA	6	1	A6	GGTATGTTGCGGACTGCCACTCTGT	TTCAGGGTCTCCGGATGGGGTCATATTACACTCGGACCTCGTCGACATGCATTGCTTGCGCATCTCTTCTAACTGCTGCTGCCTCCTAAGTTTCGAGCTGGACTCAGTGGGTATGTTGCGGACTGCCACTCTGT	TTCAGGGTCTCCGGATGGGGTCATATTACACTCGGACCTCGTCGACATGCATTGCTTGCGCATCTCTTCTAACTGCTGCTGCCTCCTAAGTTTCGAGCTGGACTCAGTGGGTATGTTGCGGACTGCCACTCTGTGAAGTAGGTA
ENST00000683244	ENSG00000130396	AFDN	set16	ENSG00000130396	AFDN	-46	5029	5053	25	TCGCTCTTCGTTCAGCCTCCAGGCG	0.957849	-52.5785	0.64	1	1	1	0	1	1	4	1	1	0	5	1	A5	TTCAGGGTCTCCGGATGGGGTCATA	6	1	A6	GGTATGTTGCGGACTGCCACTCTGT	TTCAGGGTCTCCGGATGGGGTCATATTACACTCGGACCTCGTCGACATGCATTTCGCTCTTCGTTCAGCCTCCAGGCGCCTCCTAAGTTTCGAGCTGGACTCAGTGGGTATGTTGCGGACTGCCACTCTGT	TTCAGGGTCTCCGGATGGGGTCATATTACACTCGGACCTCGTCGACATGCATTTCGCTCTTCGTTCAGCCTCCAGGCGCCTCCTAAGTTTCGAGCTGGACTCAGTGGGTATGTTGCGGACTGCCACTCTGTTGTCACGCTCCTG
ENST00000683244	ENSG00000130396	AFDN	set16	ENSG00000130396	AFDN	-46	4867	4891	25	TGCGGTCCGGTTTGCTCTGGAGCTC	0.942151	-53.3785	0.64	1	1	1	0	1	1	4	1	1	0	5	1	A5	TTCAGGGTCTCCGGATGGGGTCATA	6	1	A6	GGTATGTTGCGGACTGCCACTCTGT	TTCAGGGTCTCCGGATGGGGTCATATTACACTCGGACCTCGTCGACATGCATTTGCGGTCCGGTTTGCTCTGGAGCTCCCTCCTAAGTTTCGAGCTGGACTCAGTGGGTATGTTGCGGACTGCCACTCTGT	TTCAGGGTCTCCGGATGGGGTCATATTACACTCGGACCTCGTCGACATGCATTTGCGGTCCGGTTTGCTCTGGAGCTCCCTCCTAAGTTTCGAGCTGGACTCAGTGGGTATGTTGCGGACTGCCACTCTGTACTTGCCTTCCAG
ENST00000683244	ENSG00000130396	AFDN	set16	ENSG00000130396	AFDN	-46	4839	4865	27	TGGATCTCCTTGCTCAGCATGTCCACG	0.952151	-53.6785	0.555556	1	1	1	0	1	1	4	1	1	0	5	1	A5	TTCAGGGTCTCCGGATGGGGTCATA	6	1	A6	GGTATGTTGCGGACTGCCACTCTGT	TTCAGGGTCTCCGGATGGGGTCATATTACACTCGGACCTCGTCGACATGCATTTGGATCTCCTTGCTCAGCATGTCCACGCCTCCTAAGTTTCGAGCTGGACTCAGTGGGTATGTTGCGGACTGCCACTCTGT	TTCAGGGTCTCCGGATGGGGTCATATTACACTCGGACCTCGTCGACATGCATTTGGATCTCCTTGCTCAGCATGTCCACGCCTCCTAAGTTTCGAGCTGGACTCAGTGGGTATGTTGCGGACTGCCACTCTGTTGTAAAAGGAG
ENST00000683244	ENSG00000130396	AFDN	set16	ENSG00000130396	AFDN	-46	4812	4837	26	TGTGCATCTGCTGCTGCTTCTCCAGC	0.962151	-53.6785	0.576923	1	1	1	0	1	1	4	1	1	0	5	1	A5	TTCAGGGTCTCCGGATGGGGTCATA	6	1	A6	GGTATGTTGCGGACTGCCACTCTGT	TTCAGGGTCTCCGGATGGGGTCATATTACACTCGGACCTCGTCGACATGCATTTGTGCATCTGCTGCTGCTTCTCCAGCCCTCCTAAGTTTCGAGCTGGACTCAGTGGGTATGTTGCGGACTGCCACTCTGT	TTCAGGGTCTCCGGATGGGGTCATATTACACTCGGACCTCGTCGACATGCATTTGTGCATCTGCTGCTGCTTCTCCAGCCCTCCTAAGTTTCGAGCTGGACTCAGTGGGTATGTTGCGGACTGCCACTCTGTACGTTTGTATAG
ENST00000683244	ENSG00000130396	AFDN	set16	ENSG00000130396	AFDN	-46	4705	4730	26	TGCAAGTCTCTGCGCTCGATCGTGCG	0.987849	-53.2785	0.615385	1	1	1	0	1	1	4	1	1	0	5	1	A5	TTCAGGGTCTCCGGATGGGGTCATA	6	1	A6	GGTATGTTGCGGACTGCCACTCTGT	TTCAGGGTCTCCGGATGGGGTCATATTACACTCGGACCTCGTCGACATGCATTTGCAAGTCTCTGCGCTCGATCGTGCGCCTCCTAAGTTTCGAGCTGGACTCAGTGGGTATGTTGCGGACTGCCACTCTGT	TTCAGGGTCTCCGGATGGGGTCATATTACACTCGGACCTCGTCGACATGCATTTGCAAGTCTCTGCGCTCGATCGTGCGCCTCCTAAGTTTCGAGCTGGACTCAGTGGGTATGTTGCGGACTGCCACTCTGTCTGTTGGCTACG
ENST00000683244	ENSG00000130396	AFDN	set16	ENSG00000130396	AFDN	-46	4653	4679	27	CGAATGACTGTTTCCTGTGGCCGCTGG	0.932151	-53.4785	0.592593	1	1	1	0	1	1	4	1	1	0	5	1	A5	TTCAGGGTCTCCGGATGGGGTCATA	6	1	A6	GGTATGTTGCGGACTGCCACTCTGT	TTCAGGGTCTCCGGATGGGGTCATATTACACTCGGACCTCGTCGACATGCATTCGAATGACTGTTTCCTGTGGCCGCTGGCCTCCTAAGTTTCGAGCTGGACTCAGTGGGTATGTTGCGGACTGCCACTCTGT	TTCAGGGTCTCCGGATGGGGTCATATTACACTCGGACCTCGTCGACATGCATTCGAATGACTGTTTCCTGTGGCCGCTGGCCTCCTAAGTTTCGAGCTGGACTCAGTGGGTATGTTGCGGACTGCCACTCTGTAGTGTACCCGT
ENST00000683244	ENSG00000130396	AFDN	set16	ENSG00000130396	AFDN	-46	4624	4651	28	GTGTGGAAGGCTTTTCGGGCTTCATCTG	0.982151	-53.3785	0.535714	1	1	1	0	1	1	4	1	1	0	5	1	A5	TTCAGGGTCTCCGGATGGGGTCATA	6	1	A6	GGTATGTTGCGGACTGCCACTCTGT	TTCAGGGTCTCCGGATGGGGTCATATTACACTCGGACCTCGTCGACATGCATTGTGTGGAAGGCTTTTCGGGCTTCATCTGCCTCCTAAGTTTCGAGCTGGACTCAGTGGGTATGTTGCGGACTGCCACTCTGT	TTCAGGGTCTCCGGATGGGGTCATATTACACTCGGACCTCGTCGACATGCATTGTGTGGAAGGCTTTTCGGGCTTCATCTGCCTCCTAAGTTTCGAGCTGGACTCAGTGGGTATGTTGCGGACTGCCACTCTGTTGATTCTGTA
ENST00000683244	ENSG00000130396	AFDN	set16	ENSG00000130396	AFDN	-46	5665	5697	33	CTCCAGTTCTGTTAATTTACGAGAAGCTTTCAC	0.947849	-54.2785	0.393939	1	1	1	1	1	1	5	1	1	0	5	1	A5	TTCAGGGTCTCCGGATGGGGTCATA	6	1	A6	GGTATGTTGCGGACTGCCACTCTGT	TTCAGGGTCTCCGGATGGGGTCATATTACACTCGGACCTCGTCGACATGCATTCTCCAGTTCTGTTAATTTACGAGAAGCTTTCACCCTCCTAAGTTTCGAGCTGGACTCAGTGGGTATGTTGCGGACTGCCACTCTGT	TTCAGGGTCTCCGGATGGGGTCATATTACACTCGGACCTCGTCGACATGCATTCTCCAGTTCTGTTAATTTACGAGAAGCTTTCACCCTCCTAAGTTTCGAGCTGGACTCAGTGGGTATGTTGCGGACTGCCACTCTGTCGATT
ENST00000683244	ENSG00000130396	AFDN	set16	ENSG00000130396	AFDN	-46	5512	5536	25	GACAGGCGTCATGGGCTCCAACAGC	0.952151	-53.0785	0.64	1	1	1	1	1	1	5	1	1	0	5	1	A5	TTCAGGGTCTCCGGATGGGGTCATA	6	1	A6	GGTATGTTGCGGACTGCCACTCTGT	TTCAGGGTCTCCGGATGGGGTCATATTACACTCGGACCTCGTCGACATGCATTGACAGGCGTCATGGGCTCCAACAGCCCTCCTAAGTTTCGAGCTGGACTCAGTGGGTATGTTGCGGACTGCCACTCTGT	TTCAGGGTCTCCGGATGGGGTCATATTACACTCGGACCTCGTCGACATGCATTGACAGGCGTCATGGGCTCCAACAGCCCTCCTAAGTTTCGAGCTGGACTCAGTGGGTATGTTGCGGACTGCCACTCTGTGCTCTCATTCAAC
ENST00000683244	ENSG00000130396	AFDN	set16	ENSG00000130396	AFDN	-46	4917	4942	26	GGAACTGCCACTCCAGCATGAGCTTG	0.927849	-52.1785	0.576923	1	1	1	1	1	1	5	1	1	0	5	1	A5	TTCAGGGTCTCCGGATGGGGTCATA	6	1	A6	GGTATGTTGCGGACTGCCACTCTGT	TTCAGGGTCTCCGGATGGGGTCATATTACACTCGGACCTCGTCGACATGCATTGGAACTGCCACTCCAGCATGAGCTTGCCTCCTAAGTTTCGAGCTGGACTCAGTGGGTATGTTGCGGACTGCCACTCTGT	TTCAGGGTCTCCGGATGGGGTCATATTACACTCGGACCTCGTCGACATGCATTGGAACTGCCACTCCAGCATGAGCTTGCCTCCTAAGTTTCGAGCTGGACTCAGTGGGTATGTTGCGGACTGCCACTCTGTGGATTTCTCTAA
ENST00000683244	ENSG00000130396	AFDN	set16	ENSG00000130396	AFDN	-46	4732	4761	30	GGAAAGCTCCTCTTTGCTGACTGTAATGTA	0.917849	-53.2785	0.433333	1	1	1	1	1	1	5	1	1	0	5	1	A5	TTCAGGGTCTCCGGATGGGGTCATA	6	1	A6	GGTATGTTGCGGACTGCCACTCTGT	TTCAGGGTCTCCGGATGGGGTCATATTACACTCGGACCTCGTCGACATGCATTGGAAAGCTCCTCTTTGCTGACTGTAATGTACCTCCTAAGTTTCGAGCTGGACTCAGTGGGTATGTTGCGGACTGCCACTCTGT	TTCAGGGTCTCCGGATGGGGTCATATTACACTCGGACCTCGTCGACATGCATTGGAAAGCTCCTCTTTGCTGACTGTAATGTACCTCCTAAGTTTCGAGCTGGACTCAGTGGGTATGTTGCGGACTGCCACTCTGTGGCGTGAC
ENST00000683244	ENSG00000130396	AFDN	set16	ENSG00000130396	AFDN	-46	4225	4249	25	TCAGTGTGGAAGCAGGGGTGACCGA	0.982151	-52.6785	0.6	1	1	1	1	1	1	5	1	1	0	5	1	A5	TTCAGGGTCTCCGGATGGGGTCATA	6	1	A6	GGTATGTTGCGGACTGCCACTCTGT	TTCAGGGTCTCCGGATGGGGTCATATTACACTCGGACCTCGTCGACATGCATTTCAGTGTGGAAGCAGGGGTGACCGACCTCCTAAGTTTCGAGCTGGACTCAGTGGGTATGTTGCGGACTGCCACTCTGT	TTCAGGGTCTCCGGATGGGGTCATATTACACTCGGACCTCGTCGACATGCATTTCAGTGTGGAAGCAGGGGTGACCGACCTCCTAAGTTTCGAGCTGGACTCAGTGGGTATGTTGCGGACTGCCACTCTGTTATCGATAACGCT
ENST00000683244	ENSG00000130396	AFDN	set16	ENSG00000130396	AFDN	-46	4169	4194	26	AGAGGTACTGGAGTCCAGTGAGGAGC	0.992151	-53.4785	0.576923	1	1	1	1	1	1	5	1	1	0	5	1	A5	TTCAGGGTCTCCGGATGGGGTCATA	6	1	A6	GGTATGTTGCGGACTGCCACTCTGT	TTCAGGGTCTCCGGATGGGGTCATATTACACTCGGACCTCGTCGACATGCATTAGAGGTACTGGAGTCCAGTGAGGAGCCCTCCTAAGTTTCGAGCTGGACTCAGTGGGTATGTTGCGGACTGCCACTCTGT	TTCAGGGTCTCCGGATGGGGTCATATTACACTCGGACCTCGTCGACATGCATTAGAGGTACTGGAGTCCAGTGAGGAGCCCTCCTAAGTTTCGAGCTGGACTCAGTGGGTATGTTGCGGACTGCCACTCTGTAAGGCAAGTGTG
ENST00000683244	ENSG00000130396	AFDN	set16	ENSG00000130396	AFDN	-46	4134	4167	34	CTGATTTATCCACATATCACTATCAGACTTTCGG	0.952151	-55.2785	0.382353	1	1	1	1	1	1	5	1	1	0	5	1	A5	TTCAGGGTCTCCGGATGGGGTCATA	6	1	A6	GGTATGTTGCGGACTGCCACTCTGT	TTCAGGGTCTCCGGATGGGGTCATATTACACTCGGACCTCGTCGACATGCATTCTGATTTATCCACATATCACTATCAGACTTTCGGCCTCCTAAGTTTCGAGCTGGACTCAGTGGGTATGTTGCGGACTGCCACTCTGT	TTCAGGGTCTCCGGATGGGGTCATATTACACTCGGACCTCGTCGACATGCATTCTGATTTATCCACATATCACTATCAGACTTTCGGCCTCCTAAGTTTCGAGCTGGACTCAGTGGGTATGTTGCGGACTGCCACTCTGTCGCT
ENST00000683244	ENSG00000130396	AFDN	set16	ENSG00000130396	AFDN	-46	4008	4038	31	GGAATGATTACTATCTGTGTGCATATGTGGC	0.977849	-53.6785	0.419355	1	1	1	1	1	1	5	1	1	0	5	1	A5	TTCAGGGTCTCCGGATGGGGTCATA	6	1	A6	GGTATGTTGCGGACTGCCACTCTGT	TTCAGGGTCTCCGGATGGGGTCATATTACACTCGGACCTCGTCGACATGCATTGGAATGATTACTATCTGTGTGCATATGTGGCCCTCCTAAGTTTCGAGCTGGACTCAGTGGGTATGTTGCGGACTGCCACTCTGT	TTCAGGGTCTCCGGATGGGGTCATATTACACTCGGACCTCGTCGACATGCATTGGAATGATTACTATCTGTGTGCATATGTGGCCCTCCTAAGTTTCGAGCTGGACTCAGTGGGTATGTTGCGGACTGCCACTCTGTCACTCCT
ENST00000683244	ENSG00000130396	AFDN	set16	ENSG00000130396	AFDN	-46	3564	3593	30	CGACGATCTGAAATTCTCTGCATCATGGGG	0.892151	-54.8785	0.5	1	1	1	1	1	1	5	1	1	0	5	1	A5	TTCAGGGTCTCCGGATGGGGTCATA	6	1	A6	GGTATGTTGCGGACTGCCACTCTGT	TTCAGGGTCTCCGGATGGGGTCATATTACACTCGGACCTCGTCGACATGCATTCGACGATCTGAAATTCTCTGCATCATGGGGCCTCCTAAGTTTCGAGCTGGACTCAGTGGGTATGTTGCGGACTGCCACTCTGT	TTCAGGGTCTCCGGATGGGGTCATATTACACTCGGACCTCGTCGACATGCATTCGACGATCTGAAATTCTCTGCATCATGGGGCCTCCTAAGTTTCGAGCTGGACTCAGTGGGTATGTTGCGGACTGCCACTCTGTTGGCTATG
ENST00000683244	ENSG00000130396	AFDN	set16	ENSG00000130396	AFDN	-46	3537	3562	26	ATGGCTGATTGAGAAGGGTGGCCAGA	0.947849	-52.1785	0.538462	1	1	1	1	1	1	5	1	1	0	5	1	A5	TTCAGGGTCTCCGGATGGGGTCATA	6	1	A6	GGTATGTTGCGGACTGCCACTCTGT	TTCAGGGTCTCCGGATGGGGTCATATTACACTCGGACCTCGTCGACATGCATTATGGCTGATTGAGAAGGGTGGCCAGACCTCCTAAGTTTCGAGCTGGACTCAGTGGGTATGTTGCGGACTGCCACTCTGT	TTCAGGGTCTCCGGATGGGGTCATATTACACTCGGACCTCGTCGACATGCATTATGGCTGATTGAGAAGGGTGGCCAGACCTCCTAAGTTTCGAGCTGGACTCAGTGGGTATGTTGCGGACTGCCACTCTGTCTTCCCCTAGAA
ENST00000683244	ENSG00000130396	AFDN	set16	ENSG00000130396	AFDN	-46	3396	3421	26	TGAGGAGCTGATCACCTGCAGCTAGA	0.917849	-52.6785	0.538462	1	1	1	1	1	1	5	1	1	0	5	1	A5	TTCAGGGTCTCCGGATGGGGTCATA	6	1	A6	GGTATGTTGCGGACTGCCACTCTGT	TTCAGGGTCTCCGGATGGGGTCATATTACACTCGGACCTCGTCGACATGCATTTGAGGAGCTGATCACCTGCAGCTAGACCTCCTAAGTTTCGAGCTGGACTCAGTGGGTATGTTGCGGACTGCCACTCTGT	TTCAGGGTCTCCGGATGGGGTCATATTACACTCGGACCTCGTCGACATGCATTTGAGGAGCTGATCACCTGCAGCTAGACCTCCTAAGTTTCGAGCTGGACTCAGTGGGTATGTTGCGGACTGCCACTCTGTAACGGGAGATAT
ENST00000683244	ENSG00000130396	AFDN	set16	ENSG00000130396	AFDN	-46	3306	3333	28	TTGACCAGCACCCTTTGCTGCAACAATG	0.977849	-52.5785	0.5	1	1	1	1	1	1	5	1	1	0	5	1	A5	TTCAGGGTCTCCGGATGGGGTCATA	6	1	A6	GGTATGTTGCGGACTGCCACTCTGT	TTCAGGGTCTCCGGATGGGGTCATATTACACTCGGACCTCGTCGACATGCATTTTGACCAGCACCCTTTGCTGCAACAATGCCTCCTAAGTTTCGAGCTGGACTCAGTGGGTATGTTGCGGACTGCCACTCTGT	TTCAGGGTCTCCGGATGGGGTCATATTACACTCGGACCTCGTCGACATGCATTTTGACCAGCACCCTTTGCTGCAACAATGCCTCCTAAGTTTCGAGCTGGACTCAGTGGGTATGTTGCGGACTGCCACTCTGTACCGTTCCGC
ENST00000683244	ENSG00000130396	AFDN	set16	ENSG00000130396	AFDN	-46	2546	2571	26	GCAGCGTCGTAGCAAGGACATGGCTC	0.952151	-53.6785	0.615385	1	1	1	1	1	1	5	1	1	0	5	1	A5	TTCAGGGTCTCCGGATGGGGTCATA	6	1	A6	GGTATGTTGCGGACTGCCACTCTGT	TTCAGGGTCTCCGGATGGGGTCATATTACACTCGGACCTCGTCGACATGCATTGCAGCGTCGTAGCAAGGACATGGCTCCCTCCTAAGTTTCGAGCTGGACTCAGTGGGTATGTTGCGGACTGCCACTCTGT	TTCAGGGTCTCCGGATGGGGTCATATTACACTCGGACCTCGTCGACATGCATTGCAGCGTCGTAGCAAGGACATGGCTCCCTCCTAAGTTTCGAGCTGGACTCAGTGGGTATGTTGCGGACTGCCACTCTGTATTCTACCCGTC
ENST00000683244	ENSG00000130396	AFDN	set16	ENSG00000130396	AFDN	-46	2233	2258	26	TGGATGACACCCTCCATCATGCTCAC	0.897849	-51.6785	0.538462	1	1	1	1	1	1	5	1	1	0	5	1	A5	TTCAGGGTCTCCGGATGGGGTCATA	6	1	A6	GGTATGTTGCGGACTGCCACTCTGT	TTCAGGGTCTCCGGATGGGGTCATATTACACTCGGACCTCGTCGACATGCATTTGGATGACACCCTCCATCATGCTCACCCTCCTAAGTTTCGAGCTGGACTCAGTGGGTATGTTGCGGACTGCCACTCTGT	TTCAGGGTCTCCGGATGGGGTCATATTACACTCGGACCTCGTCGACATGCATTTGGATGACACCCTCCATCATGCTCACCCTCCTAAGTTTCGAGCTGGACTCAGTGGGTATGTTGCGGACTGCCACTCTGTCACATACTTTCC
ENST00000683244	ENSG00000130396	AFDN	set16	ENSG00000130396	AFDN	-46	2006	2031	26	TGCAGGTAGTATCAGCTCAGGCCCAG	0.992151	-53.0785	0.576923	1	1	1	1	1	1	5	1	1	0	5	1	A5	TTCAGGGTCTCCGGATGGGGTCATA	6	1	A6	GGTATGTTGCGGACTGCCACTCTGT	TTCAGGGTCTCCGGATGGGGTCATATTACACTCGGACCTCGTCGACATGCATTTGCAGGTAGTATCAGCTCAGGCCCAGCCTCCTAAGTTTCGAGCTGGACTCAGTGGGTATGTTGCGGACTGCCACTCTGT	TTCAGGGTCTCCGGATGGGGTCATATTACACTCGGACCTCGTCGACATGCATTTGCAGGTAGTATCAGCTCAGGCCCAGCCTCCTAAGTTTCGAGCTGGACTCAGTGGGTATGTTGCGGACTGCCACTCTGTGCAAGTGCCGCA
ENST00000683244	ENSG00000130396	AFDN	set16	ENSG00000130396	AFDN	-46	3509	3535	27	CGTGGTAGATGGCACCCTGCTTTGCTA	0.962151	-53.2785	0.555556	1	1	1	0	1	1	4	1	1	0	5	1	A5	TTCAGGGTCTCCGGATGGGGTCATA	6	1	A6	GGTATGTTGCGGACTGCCACTCTGT	TTCAGGGTCTCCGGATGGGGTCATATTACACTCGGACCTCGTCGACATGCATTCGTGGTAGATGGCACCCTGCTTTGCTACCTCCTAAGTTTCGAGCTGGACTCAGTGGGTATGTTGCGGACTGCCACTCTGT	TTCAGGGTCTCCGGATGGGGTCATATTACACTCGGACCTCGTCGACATGCATTCGTGGTAGATGGCACCCTGCTTTGCTACCTCCTAAGTTTCGAGCTGGACTCAGTGGGTATGTTGCGGACTGCCACTCTGTGGTCTCTGTGC
ENST00000683244	ENSG00000130396	AFDN	set16	ENSG00000130396	AFDN	-46	3479	3507	29	TTCCAGTGTCACCACAGAGCTTGTTCTTG	0.982151	-53.7785	0.482759	1	1	1	0	1	1	4	1	1	0	5	1	A5	TTCAGGGTCTCCGGATGGGGTCATA	6	1	A6	GGTATGTTGCGGACTGCCACTCTGT	TTCAGGGTCTCCGGATGGGGTCATATTACACTCGGACCTCGTCGACATGCATTTTCCAGTGTCACCACAGAGCTTGTTCTTGCCTCCTAAGTTTCGAGCTGGACTCAGTGGGTATGTTGCGGACTGCCACTCTGT	TTCAGGGTCTCCGGATGGGGTCATATTACACTCGGACCTCGTCGACATGCATTTTCCAGTGTCACCACAGAGCTTGTTCTTGCCTCCTAAGTTTCGAGCTGGACTCAGTGGGTATGTTGCGGACTGCCACTCTGTCTGTGTTTG
ENST00000683244	ENSG00000130396	AFDN	set16	ENSG00000130396	AFDN	-46	1330	1354	25	TGGAGCCATAGCCAGACCCGTCAGC	0.872151	-53.9785	0.64	1	1	1	1	1	1	5	1	1	0	5	1	A5	TTCAGGGTCTCCGGATGGGGTCATA	6	1	A6	GGTATGTTGCGGACTGCCACTCTGT	TTCAGGGTCTCCGGATGGGGTCATATTACACTCGGACCTCGTCGACATGCATTTGGAGCCATAGCCAGACCCGTCAGCCCTCCTAAGTTTCGAGCTGGACTCAGTGGGTATGTTGCGGACTGCCACTCTGT	TTCAGGGTCTCCGGATGGGGTCATATTACACTCGGACCTCGTCGACATGCATTTGGAGCCATAGCCAGACCCGTCAGCCCTCCTAAGTTTCGAGCTGGACTCAGTGGGTATGTTGCGGACTGCCACTCTGTGCCAAGCTTAGGC
ENST00000683244	ENSG00000130396	AFDN	set16	ENSG00000130396	AFDN	-46	826	855	30	AAAGCTGGTTTCCGGCATGTCTTTGTAAAC	0.877849	-52.1785	0.433333	1	1	1	1	1	1	5	1	1	0	5	1	A5	TTCAGGGTCTCCGGATGGGGTCATA	6	1	A6	GGTATGTTGCGGACTGCCACTCTGT	TTCAGGGTCTCCGGATGGGGTCATATTACACTCGGACCTCGTCGACATGCATTAAAGCTGGTTTCCGGCATGTCTTTGTAAACCCTCCTAAGTTTCGAGCTGGACTCAGTGGGTATGTTGCGGACTGCCACTCTGT	TTCAGGGTCTCCGGATGGGGTCATATTACACTCGGACCTCGTCGACATGCATTAAAGCTGGTTTCCGGCATGTCTTTGTAAACCCTCCTAAGTTTCGAGCTGGACTCAGTGGGTATGTTGCGGACTGCCACTCTGTCGTCTAGG
ENST00000683244	ENSG00000130396	AFDN	set16	ENSG00000130396	AFDN	-46	409	438	30	GATTACATCTTGAGTGGTGGCAGTACTAGA	0.937849	-53.4785	0.433333	1	1	1	1	1	1	5	1	1	0	5	1	A5	TTCAGGGTCTCCGGATGGGGTCATA	6	1	A6	GGTATGTTGCGGACTGCCACTCTGT	TTCAGGGTCTCCGGATGGGGTCATATTACACTCGGACCTCGTCGACATGCATTGATTACATCTTGAGTGGTGGCAGTACTAGACCTCCTAAGTTTCGAGCTGGACTCAGTGGGTATGTTGCGGACTGCCACTCTGT	TTCAGGGTCTCCGGATGGGGTCATATTACACTCGGACCTCGTCGACATGCATTGATTACATCTTGAGTGGTGGCAGTACTAGACCTCCTAAGTTTCGAGCTGGACTCAGTGGGTATGTTGCGGACTGCCACTCTGTTATATGAC
ENST00000683244	ENSG00000130396	AFDN	set16	ENSG00000130396	AFDN	-46	7447	7479	33	ACATGTATCTGCATGTTCTCCTGTGTATTTTTC	0.977849	-54.1785	0.363636	1	1	1	0	1	1	4	1	1	0	5	1	A5	TTCAGGGTCTCCGGATGGGGTCATA	6	1	A6	GGTATGTTGCGGACTGCCACTCTGT	TTCAGGGTCTCCGGATGGGGTCATATTACACTCGGACCTCGTCGACATGCATTACATGTATCTGCATGTTCTCCTGTGTATTTTTCCCTCCTAAGTTTCGAGCTGGACTCAGTGGGTATGTTGCGGACTGCCACTCTGT	TTCAGGGTCTCCGGATGGGGTCATATTACACTCGGACCTCGTCGACATGCATTACATGTATCTGCATGTTCTCCTGTGTATTTTTCCCTCCTAAGTTTCGAGCTGGACTCAGTGGGTATGTTGCGGACTGCCACTCTGTACCTT
ENST00000683244	ENSG00000130396	AFDN	set16	ENSG00000130396	AFDN	-46	7347	7374	28	CAGTGTCCTCAAGATATTTGGGAGGTGC	0.887849	-52.0785	0.5	1	1	1	0	1	1	4	1	1	0	5	1	A5	TTCAGGGTCTCCGGATGGGGTCATA	6	1	A6	GGTATGTTGCGGACTGCCACTCTGT	TTCAGGGTCTCCGGATGGGGTCATATTACACTCGGACCTCGTCGACATGCATTCAGTGTCCTCAAGATATTTGGGAGGTGCCCTCCTAAGTTTCGAGCTGGACTCAGTGGGTATGTTGCGGACTGCCACTCTGT	TTCAGGGTCTCCGGATGGGGTCATATTACACTCGGACCTCGTCGACATGCATTCAGTGTCCTCAAGATATTTGGGAGGTGCCCTCCTAAGTTTCGAGCTGGACTCAGTGGGTATGTTGCGGACTGCCACTCTGTAGGCCCGGTG
ENST00000683244	ENSG00000130396	AFDN	set16	ENSG00000130396	AFDN	-46	6607	6633	27	CTGTGCTTGAGGGGTCCCTACTCATCT	0.932151	-53.8785	0.555556	1	1	1	0	1	1	4	1	1	0	5	1	A5	TTCAGGGTCTCCGGATGGGGTCATA	6	1	A6	GGTATGTTGCGGACTGCCACTCTGT	TTCAGGGTCTCCGGATGGGGTCATATTACACTCGGACCTCGTCGACATGCATTCTGTGCTTGAGGGGTCCCTACTCATCTCCTCCTAAGTTTCGAGCTGGACTCAGTGGGTATGTTGCGGACTGCCACTCTGT	TTCAGGGTCTCCGGATGGGGTCATATTACACTCGGACCTCGTCGACATGCATTCTGTGCTTGAGGGGTCCCTACTCATCTCCTCCTAAGTTTCGAGCTGGACTCAGTGGGTATGTTGCGGACTGCCACTCTGTCTACAATTAGA
ENST00000683244	ENSG00000130396	AFDN	set16	ENSG00000130396	AFDN	-46	6212	6239	28	CATGGGAGGAGCATGTCGTCATATGTTC	0.867849	-51.8785	0.5	1	1	1	0	1	1	4	1	1	0	5	1	A5	TTCAGGGTCTCCGGATGGGGTCATA	6	1	A6	GGTATGTTGCGGACTGCCACTCTGT	TTCAGGGTCTCCGGATGGGGTCATATTACACTCGGACCTCGTCGACATGCATTCATGGGAGGAGCATGTCGTCATATGTTCCCTCCTAAGTTTCGAGCTGGACTCAGTGGGTATGTTGCGGACTGCCACTCTGT	TTCAGGGTCTCCGGATGGGGTCATATTACACTCGGACCTCGTCGACATGCATTCATGGGAGGAGCATGTCGTCATATGTTCCCTCCTAAGTTTCGAGCTGGACTCAGTGGGTATGTTGCGGACTGCCACTCTGTCTGTAACCAC
ENST00000683244	ENSG00000130396	AFDN	set16	ENSG00000130396	AFDN	-46	6185	6210	26	TTCCCGGGTAGAAGAGCGTGTGGTCA	0.972151	-53.0785	0.576923	1	1	1	0	1	1	4	1	1	0	5	1	A5	TTCAGGGTCTCCGGATGGGGTCATA	6	1	A6	GGTATGTTGCGGACTGCCACTCTGT	TTCAGGGTCTCCGGATGGGGTCATATTACACTCGGACCTCGTCGACATGCATTTTCCCGGGTAGAAGAGCGTGTGGTCACCTCCTAAGTTTCGAGCTGGACTCAGTGGGTATGTTGCGGACTGCCACTCTGT	TTCAGGGTCTCCGGATGGGGTCATATTACACTCGGACCTCGTCGACATGCATTTTCCCGGGTAGAAGAGCGTGTGGTCACCTCCTAAGTTTCGAGCTGGACTCAGTGGGTATGTTGCGGACTGCCACTCTGTTTACGAGAGCCG
ENST00000683244	ENSG00000130396	AFDN	set16	ENSG00000130396	AFDN	-46	6023	6050	28	GAAGACACATCCATTCTCTTCTCCTGCC	0.907849	-52.7785	0.5	1	1	1	0	1	1	4	1	1	0	5	1	A5	TTCAGGGTCTCCGGATGGGGTCATA	6	1	A6	GGTATGTTGCGGACTGCCACTCTGT	TTCAGGGTCTCCGGATGGGGTCATATTACACTCGGACCTCGTCGACATGCATTGAAGACACATCCATTCTCTTCTCCTGCCCCTCCTAAGTTTCGAGCTGGACTCAGTGGGTATGTTGCGGACTGCCACTCTGT	TTCAGGGTCTCCGGATGGGGTCATATTACACTCGGACCTCGTCGACATGCATTGAAGACACATCCATTCTCTTCTCCTGCCCCTCCTAAGTTTCGAGCTGGACTCAGTGGGTATGTTGCGGACTGCCACTCTGTCCTTAGCCAC
ENST00000683244	ENSG00000130396	AFDN	set16	ENSG00000130396	AFDN	-46	5598	5627	30	TGGCGTTCCTTGAATGTCAAGTTTTCAGGG	0.942151	-53.9785	0.466667	1	1	1	0	1	1	4	1	1	0	5	1	A5	TTCAGGGTCTCCGGATGGGGTCATA	6	1	A6	GGTATGTTGCGGACTGCCACTCTGT	TTCAGGGTCTCCGGATGGGGTCATATTACACTCGGACCTCGTCGACATGCATTTGGCGTTCCTTGAATGTCAAGTTTTCAGGGCCTCCTAAGTTTCGAGCTGGACTCAGTGGGTATGTTGCGGACTGCCACTCTGT	TTCAGGGTCTCCGGATGGGGTCATATTACACTCGGACCTCGTCGACATGCATTTGGCGTTCCTTGAATGTCAAGTTTTCAGGGCCTCCTAAGTTTCGAGCTGGACTCAGTGGGTATGTTGCGGACTGCCACTCTGTTCGGACGA
ENST00000683244	ENSG00000130396	AFDN	set16	ENSG00000130396	AFDN	-46	5538	5567	30	TGGCTTTTAGAGCGCTTCTCTTTTGCATCC	0.942151	-54.6785	0.466667	1	1	1	0	1	1	4	1	1	0	5	1	A5	TTCAGGGTCTCCGGATGGGGTCATA	6	1	A6	GGTATGTTGCGGACTGCCACTCTGT	TTCAGGGTCTCCGGATGGGGTCATATTACACTCGGACCTCGTCGACATGCATTTGGCTTTTAGAGCGCTTCTCTTTTGCATCCCCTCCTAAGTTTCGAGCTGGACTCAGTGGGTATGTTGCGGACTGCCACTCTGT	TTCAGGGTCTCCGGATGGGGTCATATTACACTCGGACCTCGTCGACATGCATTTGGCTTTTAGAGCGCTTCTCTTTTGCATCCCCTCCTAAGTTTCGAGCTGGACTCAGTGGGTATGTTGCGGACTGCCACTCTGTCCTTAAGG
ENST00000683244	ENSG00000130396	AFDN	set16	ENSG00000130396	AFDN	-46	5482	5510	29	GCTCCAGTAGATCCTGGGTAAGAGTTTGG	0.872151	-54.9785	0.517241	1	1	1	0	1	1	4	1	1	0	5	1	A5	TTCAGGGTCTCCGGATGGGGTCATA	6	1	A6	GGTATGTTGCGGACTGCCACTCTGT	TTCAGGGTCTCCGGATGGGGTCATATTACACTCGGACCTCGTCGACATGCATTGCTCCAGTAGATCCTGGGTAAGAGTTTGGCCTCCTAAGTTTCGAGCTGGACTCAGTGGGTATGTTGCGGACTGCCACTCTGT	TTCAGGGTCTCCGGATGGGGTCATATTACACTCGGACCTCGTCGACATGCATTGCTCCAGTAGATCCTGGGTAAGAGTTTGGCCTCCTAAGTTTCGAGCTGGACTCAGTGGGTATGTTGCGGACTGCCACTCTGTGGGTTTAAT
ENST00000683244	ENSG00000130396	AFDN	set16	ENSG00000130396	AFDN	-46	5371	5398	28	CCTGTGTTTTGAGGTAGGAGGCGTTTCG	0.917849	-52.2785	0.535714	1	1	1	0	1	1	4	1	1	0	5	1	A5	TTCAGGGTCTCCGGATGGGGTCATA	6	1	A6	GGTATGTTGCGGACTGCCACTCTGT	TTCAGGGTCTCCGGATGGGGTCATATTACACTCGGACCTCGTCGACATGCATTCCTGTGTTTTGAGGTAGGAGGCGTTTCGCCTCCTAAGTTTCGAGCTGGACTCAGTGGGTATGTTGCGGACTGCCACTCTGT	TTCAGGGTCTCCGGATGGGGTCATATTACACTCGGACCTCGTCGACATGCATTCCTGTGTTTTGAGGTAGGAGGCGTTTCGCCTCCTAAGTTTCGAGCTGGACTCAGTGGGTATGTTGCGGACTGCCACTCTGTTACACGCAAG
ENST00000683244	ENSG00000130396	AFDN	set16	ENSG00000130396	AFDN	-46	5187	5216	30	CTGTAATACCCTTCTTCCTGTCGCCTCTTT	0.982151	-54.0785	0.466667	1	1	1	0	1	1	4	1	1	0	5	1	A5	TTCAGGGTCTCCGGATGGGGTCATA	6	1	A6	GGTATGTTGCGGACTGCCACTCTGT	TTCAGGGTCTCCGGATGGGGTCATATTACACTCGGACCTCGTCGACATGCATTCTGTAATACCCTTCTTCCTGTCGCCTCTTTCCTCCTAAGTTTCGAGCTGGACTCAGTGGGTATGTTGCGGACTGCCACTCTGT	TTCAGGGTCTCCGGATGGGGTCATATTACACTCGGACCTCGTCGACATGCATTCTGTAATACCCTTCTTCCTGTCGCCTCTTTCCTCCTAAGTTTCGAGCTGGACTCAGTGGGTATGTTGCGGACTGCCACTCTGTTATGTGAG
ENST00000683244	ENSG00000130396	AFDN	set16	ENSG00000130396	AFDN	-46	5158	5185	28	CTTCAGCGTCTCGTTTTGTTCGCTCCTC	0.877849	-52.5785	0.535714	1	1	1	0	1	1	4	1	1	0	5	1	A5	TTCAGGGTCTCCGGATGGGGTCATA	6	1	A6	GGTATGTTGCGGACTGCCACTCTGT	TTCAGGGTCTCCGGATGGGGTCATATTACACTCGGACCTCGTCGACATGCATTCTTCAGCGTCTCGTTTTGTTCGCTCCTCCCTCCTAAGTTTCGAGCTGGACTCAGTGGGTATGTTGCGGACTGCCACTCTGT	TTCAGGGTCTCCGGATGGGGTCATATTACACTCGGACCTCGTCGACATGCATTCTTCAGCGTCTCGTTTTGTTCGCTCCTCCCTCCTAAGTTTCGAGCTGGACTCAGTGGGTATGTTGCGGACTGCCACTCTGTATACCACAGC
ENST00000683244	ENSG00000130396	AFDN	set16	ENSG00000130396	AFDN	-46	3451	3477	27	CATGAGTTCTGCCGCCCTTTCCTGAGA	0.972151	-53.4785	0.555556	1	1	1	0	1	1	4	1	1	0	5	1	A5	TTCAGGGTCTCCGGATGGGGTCATA	6	1	A6	GGTATGTTGCGGACTGCCACTCTGT	TTCAGGGTCTCCGGATGGGGTCATATTACACTCGGACCTCGTCGACATGCATTCATGAGTTCTGCCGCCCTTTCCTGAGACCTCCTAAGTTTCGAGCTGGACTCAGTGGGTATGTTGCGGACTGCCACTCTGT	TTCAGGGTCTCCGGATGGGGTCATATTACACTCGGACCTCGTCGACATGCATTCATGAGTTCTGCCGCCCTTTCCTGAGACCTCCTAAGTTTCGAGCTGGACTCAGTGGGTATGTTGCGGACTGCCACTCTGTTAACAGTGGAG
ENST00000683244	ENSG00000130396	AFDN	set16	ENSG00000130396	AFDN	-46	1893	1918	26	TGCTAGAGGCAGACGACACTCTGTCG	0.877849	-52.2785	0.576923	1	1	1	1	1	1	5	1	1	0	5	1	A5	TTCAGGGTCTCCGGATGGGGTCATA	6	1	A6	GGTATGTTGCGGACTGCCACTCTGT	TTCAGGGTCTCCGGATGGGGTCATATTACACTCGGACCTCGTCGACATGCATTTGCTAGAGGCAGACGACACTCTGTCGCCTCCTAAGTTTCGAGCTGGACTCAGTGGGTATGTTGCGGACTGCCACTCTGT	TTCAGGGTCTCCGGATGGGGTCATATTACACTCGGACCTCGTCGACATGCATTTGCTAGAGGCAGACGACACTCTGTCGCCTCCTAAGTTTCGAGCTGGACTCAGTGGGTATGTTGCGGACTGCCACTCTGTTGCGGTTCTATG
ENST00000683244	ENSG00000130396	AFDN	set16	ENSG00000130396	AFDN	-46	1834	1863	30	CGGTAATGCTGTCCCACTATGAATATCTCC	0.997849	-53.6785	0.466667	1	1	1	1	1	1	5	1	1	0	5	1	A5	TTCAGGGTCTCCGGATGGGGTCATA	6	1	A6	GGTATGTTGCGGACTGCCACTCTGT	TTCAGGGTCTCCGGATGGGGTCATATTACACTCGGACCTCGTCGACATGCATTCGGTAATGCTGTCCCACTATGAATATCTCCCCTCCTAAGTTTCGAGCTGGACTCAGTGGGTATGTTGCGGACTGCCACTCTGT	TTCAGGGTCTCCGGATGGGGTCATATTACACTCGGACCTCGTCGACATGCATTCGGTAATGCTGTCCCACTATGAATATCTCCCCTCCTAAGTTTCGAGCTGGACTCAGTGGGTATGTTGCGGACTGCCACTCTGTGGCATACG
ENST00000220592	ENSG00000123908	AGO2	set16	ENSG00000123908	AGO2	-46	10903	10926	24	TTGCAGGATGGTGGGTTGGGGGAG	0.907849	-50.6785	0.625	1	1	1	0	1	1	4	1	1	0	7	1	A7	GGACAGTTTAGCCCATCTGCTAGGT	8	1	A8	TGCGTTAGTGTGTAGTGTCGTCCGC	GGACAGTTTAGCCCATCTGCTAGGTTTACACTCGGACCTCGTCGACATGCATTTTGCAGGATGGTGGGTTGGGGGAGCCTCCTAAGTTTCGAGCTGGACTCAGTGTGCGTTAGTGTGTAGTGTCGTCCGC	GGACAGTTTAGCCCATCTGCTAGGTTTACACTCGGACCTCGTCGACATGCATTTTGCAGGATGGTGGGTTGGGGGAGCCTCCTAAGTTTCGAGCTGGACTCAGTGTGCGTTAGTGTGTAGTGTCGTCCGCCACTTGTCACAACA
ENST00000220592	ENSG00000123908	AGO2	set16	ENSG00000123908	AGO2	-46	10682	10713	32	TTAGGTTAAGTCAAAACTGGTGTCCTATGTGC	0.922151	-54.8785	0.40625	1	1	0	1	1	1	4	1	1	0	7	1	A7	GGACAGTTTAGCCCATCTGCTAGGT	8	1	A8	TGCGTTAGTGTGTAGTGTCGTCCGC	GGACAGTTTAGCCCATCTGCTAGGTTTACACTCGGACCTCGTCGACATGCATTTTAGGTTAAGTCAAAACTGGTGTCCTATGTGCCCTCCTAAGTTTCGAGCTGGACTCAGTGTGCGTTAGTGTGTAGTGTCGTCCGC	GGACAGTTTAGCCCATCTGCTAGGTTTACACTCGGACCTCGTCGACATGCATTTTAGGTTAAGTCAAAACTGGTGTCCTATGTGCCCTCCTAAGTTTCGAGCTGGACTCAGTGTGCGTTAGTGTGTAGTGTCGTCCGCAAGCTG
ENST00000220592	ENSG00000123908	AGO2	set16	ENSG00000123908	AGO2	-46	9920	9946	27	TATGAAGTCGCTTGCACTGTGCCCTGC	0.932151	-53.8785	0.555556	1	1	1	0	1	1	4	1	1	0	7	1	A7	GGACAGTTTAGCCCATCTGCTAGGT	8	1	A8	TGCGTTAGTGTGTAGTGTCGTCCGC	GGACAGTTTAGCCCATCTGCTAGGTTTACACTCGGACCTCGTCGACATGCATTTATGAAGTCGCTTGCACTGTGCCCTGCCCTCCTAAGTTTCGAGCTGGACTCAGTGTGCGTTAGTGTGTAGTGTCGTCCGC	GGACAGTTTAGCCCATCTGCTAGGTTTACACTCGGACCTCGTCGACATGCATTTATGAAGTCGCTTGCACTGTGCCCTGCCCTCCTAAGTTTCGAGCTGGACTCAGTGTGCGTTAGTGTGTAGTGTCGTCCGCAAAAAATTTTT
ENST00000220592	ENSG00000123908	AGO2	set16	ENSG00000123908	AGO2	-46	9894	9918	25	GGTTGGTGCTGTGGGGTGTTCTTGG	0.877849	-50.6785	0.6	1	1	1	0	1	1	4	1	1	0	7	1	A7	GGACAGTTTAGCCCATCTGCTAGGT	8	1	A8	TGCGTTAGTGTGTAGTGTCGTCCGC	GGACAGTTTAGCCCATCTGCTAGGTTTACACTCGGACCTCGTCGACATGCATTGGTTGGTGCTGTGGGGTGTTCTTGGCCTCCTAAGTTTCGAGCTGGACTCAGTGTGCGTTAGTGTGTAGTGTCGTCCGC	GGACAGTTTAGCCCATCTGCTAGGTTTACACTCGGACCTCGTCGACATGCATTGGTTGGTGCTGTGGGGTGTTCTTGGCCTCCTAAGTTTCGAGCTGGACTCAGTGTGCGTTAGTGTGTAGTGTCGTCCGCGTACTAATGCGTA
ENST00000220592	ENSG00000123908	AGO2	set16	ENSG00000123908	AGO2	-46	10383	10409	27	TCTTGCACCAATCTCCTGCAATCCTGG	0.907849	-51.9785	0.518519	1	1	1	0	1	1	4	1	1	0	7	1	A7	GGACAGTTTAGCCCATCTGCTAGGT	8	1	A8	TGCGTTAGTGTGTAGTGTCGTCCGC	GGACAGTTTAGCCCATCTGCTAGGTTTACACTCGGACCTCGTCGACATGCATTTCTTGCACCAATCTCCTGCAATCCTGGCCTCCTAAGTTTCGAGCTGGACTCAGTGTGCGTTAGTGTGTAGTGTCGTCCGC	GGACAGTTTAGCCCATCTGCTAGGTTTACACTCGGACCTCGTCGACATGCATTTCTTGCACCAATCTCCTGCAATCCTGGCCTCCTAAGTTTCGAGCTGGACTCAGTGTGCGTTAGTGTGTAGTGTCGTCCGCCGGCTGTAGTC
ENST00000220592	ENSG00000123908	AGO2	set16	ENSG00000123908	AGO2	-46	10356	10381	26	AGAGGTGGACTTGGTCAGGGTATGGG	0.982151	-52.6785	0.576923	1	1	1	0	1	1	4	1	1	0	7	1	A7	GGACAGTTTAGCCCATCTGCTAGGT	8	1	A8	TGCGTTAGTGTGTAGTGTCGTCCGC	GGACAGTTTAGCCCATCTGCTAGGTTTACACTCGGACCTCGTCGACATGCATTAGAGGTGGACTTGGTCAGGGTATGGGCCTCCTAAGTTTCGAGCTGGACTCAGTGTGCGTTAGTGTGTAGTGTCGTCCGC	GGACAGTTTAGCCCATCTGCTAGGTTTACACTCGGACCTCGTCGACATGCATTAGAGGTGGACTTGGTCAGGGTATGGGCCTCCTAAGTTTCGAGCTGGACTCAGTGTGCGTTAGTGTGTAGTGTCGTCCGCTGCTAGCTTAGG
ENST00000220592	ENSG00000123908	AGO2	set16	ENSG00000123908	AGO2	-46	8155	8184	30	AGGCAACATATTGGCTGTTTTCAGTGTGGA	0.962151	-53.7785	0.433333	1	1	1	1	1	1	5	1	1	0	7	1	A7	GGACAGTTTAGCCCATCTGCTAGGT	8	1	A8	TGCGTTAGTGTGTAGTGTCGTCCGC	GGACAGTTTAGCCCATCTGCTAGGTTTACACTCGGACCTCGTCGACATGCATTAGGCAACATATTGGCTGTTTTCAGTGTGGACCTCCTAAGTTTCGAGCTGGACTCAGTGTGCGTTAGTGTGTAGTGTCGTCCGC	GGACAGTTTAGCCCATCTGCTAGGTTTACACTCGGACCTCGTCGACATGCATTAGGCAACATATTGGCTGTTTTCAGTGTGGACCTCCTAAGTTTCGAGCTGGACTCAGTGTGCGTTAGTGTGTAGTGTCGTCCGCAACTTGGC
ENST00000220592	ENSG00000123908	AGO2	set16	ENSG00000123908	AGO2	-46	7670	7698	29	CTGGGTGGAACTCAAAGACCATGCTTTGG	0.882151	-54.2785	0.517241	1	1	1	1	1	1	5	1	1	0	7	1	A7	GGACAGTTTAGCCCATCTGCTAGGT	8	1	A8	TGCGTTAGTGTGTAGTGTCGTCCGC	GGACAGTTTAGCCCATCTGCTAGGTTTACACTCGGACCTCGTCGACATGCATTCTGGGTGGAACTCAAAGACCATGCTTTGGCCTCCTAAGTTTCGAGCTGGACTCAGTGTGCGTTAGTGTGTAGTGTCGTCCGC	GGACAGTTTAGCCCATCTGCTAGGTTTACACTCGGACCTCGTCGACATGCATTCTGGGTGGAACTCAAAGACCATGCTTTGGCCTCCTAAGTTTCGAGCTGGACTCAGTGTGCGTTAGTGTGTAGTGTCGTCCGCTCGGTCCTG
ENST00000220592	ENSG00000123908	AGO2	set16	ENSG00000123908	AGO2	-46	9804	9828	25	TCCAGTTCCTGGAGACACTTGGGGG	0.947849	-51.7785	0.6	1	1	1	0	1	1	4	1	1	0	7	1	A7	GGACAGTTTAGCCCATCTGCTAGGT	8	1	A8	TGCGTTAGTGTGTAGTGTCGTCCGC	GGACAGTTTAGCCCATCTGCTAGGTTTACACTCGGACCTCGTCGACATGCATTTCCAGTTCCTGGAGACACTTGGGGGCCTCCTAAGTTTCGAGCTGGACTCAGTGTGCGTTAGTGTGTAGTGTCGTCCGC	GGACAGTTTAGCCCATCTGCTAGGTTTACACTCGGACCTCGTCGACATGCATTTCCAGTTCCTGGAGACACTTGGGGGCCTCCTAAGTTTCGAGCTGGACTCAGTGTGCGTTAGTGTGTAGTGTCGTCCGCTTACAAGCGGCGT
ENST00000220592	ENSG00000123908	AGO2	set16	ENSG00000123908	AGO2	-46	8278	8302	25	AGGTGACCCTGGTCCACCTGACACA	0.932151	-52.9785	0.6	1	1	1	1	1	1	5	1	1	0	7	1	A7	GGACAGTTTAGCCCATCTGCTAGGT	8	1	A8	TGCGTTAGTGTGTAGTGTCGTCCGC	GGACAGTTTAGCCCATCTGCTAGGTTTACACTCGGACCTCGTCGACATGCATTAGGTGACCCTGGTCCACCTGACACACCTCCTAAGTTTCGAGCTGGACTCAGTGTGCGTTAGTGTGTAGTGTCGTCCGC	GGACAGTTTAGCCCATCTGCTAGGTTTACACTCGGACCTCGTCGACATGCATTAGGTGACCCTGGTCCACCTGACACACCTCCTAAGTTTCGAGCTGGACTCAGTGTGCGTTAGTGTGTAGTGTCGTCCGCAACAATGCCCCGA
ENST00000220592	ENSG00000123908	AGO2	set16	ENSG00000123908	AGO2	-46	10928	10953	26	CTGTGGAGGGAGAGGCCATTCCTTGC	0.872151	-54.0785	0.615385	1	1	1	0	1	1	4	1	1	0	7	1	A7	GGACAGTTTAGCCCATCTGCTAGGT	8	1	A8	TGCGTTAGTGTGTAGTGTCGTCCGC	GGACAGTTTAGCCCATCTGCTAGGTTTACACTCGGACCTCGTCGACATGCATTCTGTGGAGGGAGAGGCCATTCCTTGCCCTCCTAAGTTTCGAGCTGGACTCAGTGTGCGTTAGTGTGTAGTGTCGTCCGC	GGACAGTTTAGCCCATCTGCTAGGTTTACACTCGGACCTCGTCGACATGCATTCTGTGGAGGGAGAGGCCATTCCTTGCCCTCCTAAGTTTCGAGCTGGACTCAGTGTGCGTTAGTGTGTAGTGTCGTCCGCTCGGTAATGCTC
ENST00000220592	ENSG00000123908	AGO2	set16	ENSG00000123908	AGO2	-46	6808	6833	26	GCCGAAGGACTCATCCAGTTCCCAGA	0.997849	-52.9785	0.576923	1	1	1	1	1	1	5	1	1	0	7	1	A7	GGACAGTTTAGCCCATCTGCTAGGT	8	1	A8	TGCGTTAGTGTGTAGTGTCGTCCGC	GGACAGTTTAGCCCATCTGCTAGGTTTACACTCGGACCTCGTCGACATGCATTGCCGAAGGACTCATCCAGTTCCCAGACCTCCTAAGTTTCGAGCTGGACTCAGTGTGCGTTAGTGTGTAGTGTCGTCCGC	GGACAGTTTAGCCCATCTGCTAGGTTTACACTCGGACCTCGTCGACATGCATTGCCGAAGGACTCATCCAGTTCCCAGACCTCCTAAGTTTCGAGCTGGACTCAGTGTGCGTTAGTGTGTAGTGTCGTCCGCCGACATCTTAGT
ENST00000220592	ENSG00000123908	AGO2	set16	ENSG00000123908	AGO2	-46	6453	6480	28	ACATGCACTGGAATATCTGTGTCGGCCA	0.942151	-53.6785	0.5	1	1	1	1	1	1	5	1	1	0	7	1	A7	GGACAGTTTAGCCCATCTGCTAGGT	8	1	A8	TGCGTTAGTGTGTAGTGTCGTCCGC	GGACAGTTTAGCCCATCTGCTAGGTTTACACTCGGACCTCGTCGACATGCATTACATGCACTGGAATATCTGTGTCGGCCACCTCCTAAGTTTCGAGCTGGACTCAGTGTGCGTTAGTGTGTAGTGTCGTCCGC	GGACAGTTTAGCCCATCTGCTAGGTTTACACTCGGACCTCGTCGACATGCATTACATGCACTGGAATATCTGTGTCGGCCACCTCCTAAGTTTCGAGCTGGACTCAGTGTGCGTTAGTGTGTAGTGTCGTCCGCCAGATTGTAC
ENST00000220592	ENSG00000123908	AGO2	set16	ENSG00000123908	AGO2	-46	5888	5912	25	CACACACGAGGGCAGCTTTCCACCG	0.917849	-51.4785	0.64	1	1	1	1	1	1	5	1	1	0	7	1	A7	GGACAGTTTAGCCCATCTGCTAGGT	8	1	A8	TGCGTTAGTGTGTAGTGTCGTCCGC	GGACAGTTTAGCCCATCTGCTAGGTTTACACTCGGACCTCGTCGACATGCATTCACACACGAGGGCAGCTTTCCACCGCCTCCTAAGTTTCGAGCTGGACTCAGTGTGCGTTAGTGTGTAGTGTCGTCCGC	GGACAGTTTAGCCCATCTGCTAGGTTTACACTCGGACCTCGTCGACATGCATTCACACACGAGGGCAGCTTTCCACCGCCTCCTAAGTTTCGAGCTGGACTCAGTGTGCGTTAGTGTGTAGTGTCGTCCGCCTTCTGGACATAT
ENST00000220592	ENSG00000123908	AGO2	set16	ENSG00000123908	AGO2	-46	5008	5033	26	GCTGCAGGCCATCGCTTAGACACAGA	0.987849	-53.0785	0.576923	1	1	1	1	1	1	5	1	1	0	7	1	A7	GGACAGTTTAGCCCATCTGCTAGGT	8	1	A8	TGCGTTAGTGTGTAGTGTCGTCCGC	GGACAGTTTAGCCCATCTGCTAGGTTTACACTCGGACCTCGTCGACATGCATTGCTGCAGGCCATCGCTTAGACACAGACCTCCTAAGTTTCGAGCTGGACTCAGTGTGCGTTAGTGTGTAGTGTCGTCCGC	GGACAGTTTAGCCCATCTGCTAGGTTTACACTCGGACCTCGTCGACATGCATTGCTGCAGGCCATCGCTTAGACACAGACCTCCTAAGTTTCGAGCTGGACTCAGTGTGCGTTAGTGTGTAGTGTCGTCCGCACAATCCCCACG
ENST00000220592	ENSG00000123908	AGO2	set16	ENSG00000123908	AGO2	-46	4190	4219	30	TCAGCACAAACAGAGTTGTCTGTTGTTAGC	0.917849	-53.1785	0.433333	1	1	1	1	1	1	5	1	1	0	7	1	A7	GGACAGTTTAGCCCATCTGCTAGGT	8	1	A8	TGCGTTAGTGTGTAGTGTCGTCCGC	GGACAGTTTAGCCCATCTGCTAGGTTTACACTCGGACCTCGTCGACATGCATTTCAGCACAAACAGAGTTGTCTGTTGTTAGCCCTCCTAAGTTTCGAGCTGGACTCAGTGTGCGTTAGTGTGTAGTGTCGTCCGC	GGACAGTTTAGCCCATCTGCTAGGTTTACACTCGGACCTCGTCGACATGCATTTCAGCACAAACAGAGTTGTCTGTTGTTAGCCCTCCTAAGTTTCGAGCTGGACTCAGTGTGCGTTAGTGTGTAGTGTCGTCCGCCCCCAAGC
ENST00000220592	ENSG00000123908	AGO2	set16	ENSG00000123908	AGO2	-46	3842	3869	28	CTTCATCAGCTGAGTGAGTGACACACGG	0.977849	-53.3785	0.535714	1	1	1	1	1	1	5	1	1	0	7	1	A7	GGACAGTTTAGCCCATCTGCTAGGT	8	1	A8	TGCGTTAGTGTGTAGTGTCGTCCGC	GGACAGTTTAGCCCATCTGCTAGGTTTACACTCGGACCTCGTCGACATGCATTCTTCATCAGCTGAGTGAGTGACACACGGCCTCCTAAGTTTCGAGCTGGACTCAGTGTGCGTTAGTGTGTAGTGTCGTCCGC	GGACAGTTTAGCCCATCTGCTAGGTTTACACTCGGACCTCGTCGACATGCATTCTTCATCAGCTGAGTGAGTGACACACGGCCTCCTAAGTTTCGAGCTGGACTCAGTGTGCGTTAGTGTGTAGTGTCGTCCGCATTTTACGTA
ENST00000220592	ENSG00000123908	AGO2	set16	ENSG00000123908	AGO2	-46	2974	3007	34	GAGTTCATAGACTGGTTTTAGGAGATTTTTAGGA	0.992151	-55.0785	0.352941	1	1	1	1	1	1	5	1	1	0	7	1	A7	GGACAGTTTAGCCCATCTGCTAGGT	8	1	A8	TGCGTTAGTGTGTAGTGTCGTCCGC	GGACAGTTTAGCCCATCTGCTAGGTTTACACTCGGACCTCGTCGACATGCATTGAGTTCATAGACTGGTTTTAGGAGATTTTTAGGACCTCCTAAGTTTCGAGCTGGACTCAGTGTGCGTTAGTGTGTAGTGTCGTCCGC	GGACAGTTTAGCCCATCTGCTAGGTTTACACTCGGACCTCGTCGACATGCATTGAGTTCATAGACTGGTTTTAGGAGATTTTTAGGACCTCCTAAGTTTCGAGCTGGACTCAGTGTGCGTTAGTGTGTAGTGTCGTCCGCCTTT
ENST00000220592	ENSG00000123908	AGO2	set16	ENSG00000123908	AGO2	-46	2162	2187	26	ATGGCCAGCAACTCGTGGTGGAGAAC	0.997849	-52.6785	0.576923	1	1	1	1	1	1	5	1	1	0	7	1	A7	GGACAGTTTAGCCCATCTGCTAGGT	8	1	A8	TGCGTTAGTGTGTAGTGTCGTCCGC	GGACAGTTTAGCCCATCTGCTAGGTTTACACTCGGACCTCGTCGACATGCATTATGGCCAGCAACTCGTGGTGGAGAACCCTCCTAAGTTTCGAGCTGGACTCAGTGTGCGTTAGTGTGTAGTGTCGTCCGC	GGACAGTTTAGCCCATCTGCTAGGTTTACACTCGGACCTCGTCGACATGCATTATGGCCAGCAACTCGTGGTGGAGAACCCTCCTAAGTTTCGAGCTGGACTCAGTGTGCGTTAGTGTGTAGTGTCGTCCGCGTCTACAAAGTG
ENST00000220592	ENSG00000123908	AGO2	set16	ENSG00000123908	AGO2	-46	2135	2160	26	TGCTGGAACTGGCCTTCAGAGACACC	0.962151	-53.3785	0.576923	1	1	1	1	1	1	5	1	1	0	7	1	A7	GGACAGTTTAGCCCATCTGCTAGGT	8	1	A8	TGCGTTAGTGTGTAGTGTCGTCCGC	GGACAGTTTAGCCCATCTGCTAGGTTTACACTCGGACCTCGTCGACATGCATTTGCTGGAACTGGCCTTCAGAGACACCCCTCCTAAGTTTCGAGCTGGACTCAGTGTGCGTTAGTGTGTAGTGTCGTCCGC	GGACAGTTTAGCCCATCTGCTAGGTTTACACTCGGACCTCGTCGACATGCATTTGCTGGAACTGGCCTTCAGAGACACCCCTCCTAAGTTTCGAGCTGGACTCAGTGTGCGTTAGTGTGTAGTGTCGTCCGCGCTCCGTCGGGT
ENST00000220592	ENSG00000123908	AGO2	set16	ENSG00000123908	AGO2	-46	2078	2106	29	TTGAAGCGCGTGGACTTGTAGAACTGGAT	0.972151	-53.9785	0.482759	1	1	1	1	1	1	5	1	1	0	7	1	A7	GGACAGTTTAGCCCATCTGCTAGGT	8	1	A8	TGCGTTAGTGTGTAGTGTCGTCCGC	GGACAGTTTAGCCCATCTGCTAGGTTTACACTCGGACCTCGTCGACATGCATTTTGAAGCGCGTGGACTTGTAGAACTGGATCCTCCTAAGTTTCGAGCTGGACTCAGTGTGCGTTAGTGTGTAGTGTCGTCCGC	GGACAGTTTAGCCCATCTGCTAGGTTTACACTCGGACCTCGTCGACATGCATTTTGAAGCGCGTGGACTTGTAGAACTGGATCCTCCTAAGTTTCGAGCTGGACTCAGTGTGCGTTAGTGTGTAGTGTCGTCCGCTTTGCCAGG
ENST00000220592	ENSG00000123908	AGO2	set16	ENSG00000123908	AGO2	-46	7355	7387	33	TCATGTCACTTCTCCTACCACAAATCTATTTAC	0.967849	-54.2785	0.363636	1	1	1	1	1	1	5	1	1	0	7	1	A7	GGACAGTTTAGCCCATCTGCTAGGT	8	1	A8	TGCGTTAGTGTGTAGTGTCGTCCGC	GGACAGTTTAGCCCATCTGCTAGGTTTACACTCGGACCTCGTCGACATGCATTTCATGTCACTTCTCCTACCACAAATCTATTTACCCTCCTAAGTTTCGAGCTGGACTCAGTGTGCGTTAGTGTGTAGTGTCGTCCGC	GGACAGTTTAGCCCATCTGCTAGGTTTACACTCGGACCTCGTCGACATGCATTTCATGTCACTTCTCCTACCACAAATCTATTTACCCTCCTAAGTTTCGAGCTGGACTCAGTGTGCGTTAGTGTGTAGTGTCGTCCGCGTCCG
ENST00000220592	ENSG00000123908	AGO2	set16	ENSG00000123908	AGO2	-46	7053	7078	26	GCAAGTGAGGCGCATGAGCACTGAGG	0.932151	-53.7785	0.615385	1	1	1	1	1	1	5	1	1	0	7	1	A7	GGACAGTTTAGCCCATCTGCTAGGT	8	1	A8	TGCGTTAGTGTGTAGTGTCGTCCGC	GGACAGTTTAGCCCATCTGCTAGGTTTACACTCGGACCTCGTCGACATGCATTGCAAGTGAGGCGCATGAGCACTGAGGCCTCCTAAGTTTCGAGCTGGACTCAGTGTGCGTTAGTGTGTAGTGTCGTCCGC	GGACAGTTTAGCCCATCTGCTAGGTTTACACTCGGACCTCGTCGACATGCATTGCAAGTGAGGCGCATGAGCACTGAGGCCTCCTAAGTTTCGAGCTGGACTCAGTGTGCGTTAGTGTGTAGTGTCGTCCGCAATCGGCCTGAT
ENST00000220592	ENSG00000123908	AGO2	set16	ENSG00000123908	AGO2	-46	6897	6926	30	GTCGACTTCTAAAGCTCCTCCTAATGGAAC	0.967849	-53.9785	0.466667	1	1	1	1	1	1	5	1	1	0	7	1	A7	GGACAGTTTAGCCCATCTGCTAGGT	8	1	A8	TGCGTTAGTGTGTAGTGTCGTCCGC	GGACAGTTTAGCCCATCTGCTAGGTTTACACTCGGACCTCGTCGACATGCATTGTCGACTTCTAAAGCTCCTCCTAATGGAACCCTCCTAAGTTTCGAGCTGGACTCAGTGTGCGTTAGTGTGTAGTGTCGTCCGC	GGACAGTTTAGCCCATCTGCTAGGTTTACACTCGGACCTCGTCGACATGCATTGTCGACTTCTAAAGCTCCTCCTAATGGAACCCTCCTAAGTTTCGAGCTGGACTCAGTGTGCGTTAGTGTGTAGTGTCGTCCGCTTTGCTAA
ENST00000220592	ENSG00000123908	AGO2	set16	ENSG00000123908	AGO2	-46	498	526	29	CTTGATGGACACCTTGAAGATGCGATCCT	0.987849	-53.4785	0.482759	1	1	1	1	1	1	5	1	1	0	7	1	A7	GGACAGTTTAGCCCATCTGCTAGGT	8	1	A8	TGCGTTAGTGTGTAGTGTCGTCCGC	GGACAGTTTAGCCCATCTGCTAGGTTTACACTCGGACCTCGTCGACATGCATTCTTGATGGACACCTTGAAGATGCGATCCTCCTCCTAAGTTTCGAGCTGGACTCAGTGTGCGTTAGTGTGTAGTGTCGTCCGC	GGACAGTTTAGCCCATCTGCTAGGTTTACACTCGGACCTCGTCGACATGCATTCTTGATGGACACCTTGAAGATGCGATCCTCCTCCTAAGTTTCGAGCTGGACTCAGTGTGCGTTAGTGTGTAGTGTCGTCCGCGCGTTCTAT
ENST00000220592	ENSG00000123908	AGO2	set16	ENSG00000123908	AGO2	-46	296	326	31	GGCACTTCTCTGGCTTGATATCCAATTCATA	0.962151	-54.4785	0.419355	1	1	1	1	1	1	5	1	1	0	7	1	A7	GGACAGTTTAGCCCATCTGCTAGGT	8	1	A8	TGCGTTAGTGTGTAGTGTCGTCCGC	GGACAGTTTAGCCCATCTGCTAGGTTTACACTCGGACCTCGTCGACATGCATTGGCACTTCTCTGGCTTGATATCCAATTCATACCTCCTAAGTTTCGAGCTGGACTCAGTGTGCGTTAGTGTGTAGTGTCGTCCGC	GGACAGTTTAGCCCATCTGCTAGGTTTACACTCGGACCTCGTCGACATGCATTGGCACTTCTCTGGCTTGATATCCAATTCATACCTCCTAAGTTTCGAGCTGGACTCAGTGTGCGTTAGTGTGTAGTGTCGTCCGCCCTATAC
ENST00000220592	ENSG00000123908	AGO2	set16	ENSG00000123908	AGO2	-46	229	261	33	AAGAAATTGGCCTGTAATTTGATTGTTCTCCCG	0.922151	-54.7785	0.393939	1	1	1	1	1	1	5	1	1	0	7	1	A7	GGACAGTTTAGCCCATCTGCTAGGT	8	1	A8	TGCGTTAGTGTGTAGTGTCGTCCGC	GGACAGTTTAGCCCATCTGCTAGGTTTACACTCGGACCTCGTCGACATGCATTAAGAAATTGGCCTGTAATTTGATTGTTCTCCCGCCTCCTAAGTTTCGAGCTGGACTCAGTGTGCGTTAGTGTGTAGTGTCGTCCGC	GGACAGTTTAGCCCATCTGCTAGGTTTACACTCGGACCTCGTCGACATGCATTAAGAAATTGGCCTGTAATTTGATTGTTCTCCCGCCTCCTAAGTTTCGAGCTGGACTCAGTGTGCGTTAGTGTGTAGTGTCGTCCGCGATTC
ENST00000220592	ENSG00000123908	AGO2	set16	ENSG00000123908	AGO2	-46	202	227	26	AGGTCCCAAAGTCGGGTCTAGGTGGA	0.932151	-53.3785	0.576923	1	1	1	1	1	1	5	1	1	0	7	1	A7	GGACAGTTTAGCCCATCTGCTAGGT	8	1	A8	TGCGTTAGTGTGTAGTGTCGTCCGC	GGACAGTTTAGCCCATCTGCTAGGTTTACACTCGGACCTCGTCGACATGCATTAGGTCCCAAAGTCGGGTCTAGGTGGACCTCCTAAGTTTCGAGCTGGACTCAGTGTGCGTTAGTGTGTAGTGTCGTCCGC	GGACAGTTTAGCCCATCTGCTAGGTTTACACTCGGACCTCGTCGACATGCATTAGGTCCCAAAGTCGGGTCTAGGTGGACCTCCTAAGTTTCGAGCTGGACTCAGTGTGCGTTAGTGTGTAGTGTCGTCCGCTCCTAGACGGGT
ENST00000220592	ENSG00000123908	AGO2	set16	ENSG00000123908	AGO2	-46	14444	14473	30	TTCTGTGCATGTTAGGGGTTATGTAAGGAG	0.917849	-52.6785	0.433333	1	1	1	0	1	1	4	1	1	0	7	1	A7	GGACAGTTTAGCCCATCTGCTAGGT	8	1	A8	TGCGTTAGTGTGTAGTGTCGTCCGC	GGACAGTTTAGCCCATCTGCTAGGTTTACACTCGGACCTCGTCGACATGCATTTTCTGTGCATGTTAGGGGTTATGTAAGGAGCCTCCTAAGTTTCGAGCTGGACTCAGTGTGCGTTAGTGTGTAGTGTCGTCCGC	GGACAGTTTAGCCCATCTGCTAGGTTTACACTCGGACCTCGTCGACATGCATTTTCTGTGCATGTTAGGGGTTATGTAAGGAGCCTCCTAAGTTTCGAGCTGGACTCAGTGTGCGTTAGTGTGTAGTGTCGTCCGCCATTACTA
ENST00000220592	ENSG00000123908	AGO2	set16	ENSG00000123908	AGO2	-46	14195	14223	29	TGACAATCAAGACCACTCCCCATCTGTTC	0.912151	-54.3785	0.482759	1	1	1	1	0	1	4	1	1	0	7	1	A7	GGACAGTTTAGCCCATCTGCTAGGT	8	1	A8	TGCGTTAGTGTGTAGTGTCGTCCGC	GGACAGTTTAGCCCATCTGCTAGGTTTACACTCGGACCTCGTCGACATGCATTTGACAATCAAGACCACTCCCCATCTGTTCCCTCCTAAGTTTCGAGCTGGACTCAGTGTGCGTTAGTGTGTAGTGTCGTCCGC	GGACAGTTTAGCCCATCTGCTAGGTTTACACTCGGACCTCGTCGACATGCATTTGACAATCAAGACCACTCCCCATCTGTTCCCTCCTAAGTTTCGAGCTGGACTCAGTGTGCGTTAGTGTGTAGTGTCGTCCGCTTTTGTCGC
ENST00000220592	ENSG00000123908	AGO2	set16	ENSG00000123908	AGO2	-46	14112	14136	25	AGAGGCTCGGGCTGCCTGATTTCAG	0.867849	-51.4785	0.6	1	1	1	0	1	1	4	1	1	0	7	1	A7	GGACAGTTTAGCCCATCTGCTAGGT	8	1	A8	TGCGTTAGTGTGTAGTGTCGTCCGC	GGACAGTTTAGCCCATCTGCTAGGTTTACACTCGGACCTCGTCGACATGCATTAGAGGCTCGGGCTGCCTGATTTCAGCCTCCTAAGTTTCGAGCTGGACTCAGTGTGCGTTAGTGTGTAGTGTCGTCCGC	GGACAGTTTAGCCCATCTGCTAGGTTTACACTCGGACCTCGTCGACATGCATTAGAGGCTCGGGCTGCCTGATTTCAGCCTCCTAAGTTTCGAGCTGGACTCAGTGTGCGTTAGTGTGTAGTGTCGTCCGCAGAAGGGTGTCAT
ENST00000220592	ENSG00000123908	AGO2	set16	ENSG00000123908	AGO2	-46	13561	13584	24	ATGCGTCCTGGGGAGCCAATTGCC	0.877849	-50.6785	0.625	1	1	1	0	1	1	4	1	1	0	7	1	A7	GGACAGTTTAGCCCATCTGCTAGGT	8	1	A8	TGCGTTAGTGTGTAGTGTCGTCCGC	GGACAGTTTAGCCCATCTGCTAGGTTTACACTCGGACCTCGTCGACATGCATTATGCGTCCTGGGGAGCCAATTGCCCCTCCTAAGTTTCGAGCTGGACTCAGTGTGCGTTAGTGTGTAGTGTCGTCCGC	GGACAGTTTAGCCCATCTGCTAGGTTTACACTCGGACCTCGTCGACATGCATTATGCGTCCTGGGGAGCCAATTGCCCCTCCTAAGTTTCGAGCTGGACTCAGTGTGCGTTAGTGTGTAGTGTCGTCCGCGTACGGTCTCTGCC
ENST00000220592	ENSG00000123908	AGO2	set16	ENSG00000123908	AGO2	-46	13030	13055	26	TCTGCCTCCACAAAGCCACGAGCTCT	0.952151	-53.6785	0.576923	1	1	1	1	1	0	4	1	1	0	7	1	A7	GGACAGTTTAGCCCATCTGCTAGGT	8	1	A8	TGCGTTAGTGTGTAGTGTCGTCCGC	GGACAGTTTAGCCCATCTGCTAGGTTTACACTCGGACCTCGTCGACATGCATTTCTGCCTCCACAAAGCCACGAGCTCTCCTCCTAAGTTTCGAGCTGGACTCAGTGTGCGTTAGTGTGTAGTGTCGTCCGC	GGACAGTTTAGCCCATCTGCTAGGTTTACACTCGGACCTCGTCGACATGCATTTCTGCCTCCACAAAGCCACGAGCTCTCCTCCTAAGTTTCGAGCTGGACTCAGTGTGCGTTAGTGTGTAGTGTCGTCCGCGGTATTGGGTAC
ENST00000220592	ENSG00000123908	AGO2	set16	ENSG00000123908	AGO2	-46	12978	13003	26	TTAGCACCTCCACCAGGTAGGTCAGG	0.992151	-52.7785	0.576923	1	1	1	1	1	0	4	1	1	0	7	1	A7	GGACAGTTTAGCCCATCTGCTAGGT	8	1	A8	TGCGTTAGTGTGTAGTGTCGTCCGC	GGACAGTTTAGCCCATCTGCTAGGTTTACACTCGGACCTCGTCGACATGCATTTTAGCACCTCCACCAGGTAGGTCAGGCCTCCTAAGTTTCGAGCTGGACTCAGTGTGCGTTAGTGTGTAGTGTCGTCCGC	GGACAGTTTAGCCCATCTGCTAGGTTTACACTCGGACCTCGTCGACATGCATTTTAGCACCTCCACCAGGTAGGTCAGGCCTCCTAAGTTTCGAGCTGGACTCAGTGTGCGTTAGTGTGTAGTGTCGTCCGCGGGTTGATTGTA
ENST00000220592	ENSG00000123908	AGO2	set16	ENSG00000123908	AGO2	-46	12851	12880	30	GATGAGGGTACTTGGGATTTTTTTTCTGGC	0.867849	-52.0785	0.433333	1	1	1	0	1	1	4	1	1	0	7	1	A7	GGACAGTTTAGCCCATCTGCTAGGT	8	1	A8	TGCGTTAGTGTGTAGTGTCGTCCGC	GGACAGTTTAGCCCATCTGCTAGGTTTACACTCGGACCTCGTCGACATGCATTGATGAGGGTACTTGGGATTTTTTTTCTGGCCCTCCTAAGTTTCGAGCTGGACTCAGTGTGCGTTAGTGTGTAGTGTCGTCCGC	GGACAGTTTAGCCCATCTGCTAGGTTTACACTCGGACCTCGTCGACATGCATTGATGAGGGTACTTGGGATTTTTTTTCTGGCCCTCCTAAGTTTCGAGCTGGACTCAGTGTGCGTTAGTGTGTAGTGTCGTCCGCACCTGTAC
ENST00000220592	ENSG00000123908	AGO2	set16	ENSG00000123908	AGO2	-46	12716	12745	30	TTTTTTTTCTTTTCACAGGGGGGCAGTCGG	0.952151	-53.5785	0.466667	1	1	1	0	1	1	4	1	1	0	7	1	A7	GGACAGTTTAGCCCATCTGCTAGGT	8	1	A8	TGCGTTAGTGTGTAGTGTCGTCCGC	GGACAGTTTAGCCCATCTGCTAGGTTTACACTCGGACCTCGTCGACATGCATTTTTTTTTTCTTTTCACAGGGGGGCAGTCGGCCTCCTAAGTTTCGAGCTGGACTCAGTGTGCGTTAGTGTGTAGTGTCGTCCGC	GGACAGTTTAGCCCATCTGCTAGGTTTACACTCGGACCTCGTCGACATGCATTTTTTTTTTCTTTTCACAGGGGGGCAGTCGGCCTCCTAAGTTTCGAGCTGGACTCAGTGTGCGTTAGTGTGTAGTGTCGTCCGCCTACCCAT
ENST00000220592	ENSG00000123908	AGO2	set16	ENSG00000123908	AGO2	-46	11815	11840	26	GCCACCTAGCATCATGCAAGCGTGGA	0.982151	-52.9785	0.576923	1	1	1	1	1	0	4	1	1	0	7	1	A7	GGACAGTTTAGCCCATCTGCTAGGT	8	1	A8	TGCGTTAGTGTGTAGTGTCGTCCGC	GGACAGTTTAGCCCATCTGCTAGGTTTACACTCGGACCTCGTCGACATGCATTGCCACCTAGCATCATGCAAGCGTGGACCTCCTAAGTTTCGAGCTGGACTCAGTGTGCGTTAGTGTGTAGTGTCGTCCGC	GGACAGTTTAGCCCATCTGCTAGGTTTACACTCGGACCTCGTCGACATGCATTGCCACCTAGCATCATGCAAGCGTGGACCTCCTAAGTTTCGAGCTGGACTCAGTGTGCGTTAGTGTGTAGTGTCGTCCGCTAGCCGACGGCG
ENST00000220592	ENSG00000123908	AGO2	set16	ENSG00000123908	AGO2	-46	11496	11524	29	CCCTTGGAGCTGCTCAGCTTCTTAGAAAA	0.987849	-53.7785	0.482759	1	1	0	1	1	1	4	1	1	0	7	1	A7	GGACAGTTTAGCCCATCTGCTAGGT	8	1	A8	TGCGTTAGTGTGTAGTGTCGTCCGC	GGACAGTTTAGCCCATCTGCTAGGTTTACACTCGGACCTCGTCGACATGCATTCCCTTGGAGCTGCTCAGCTTCTTAGAAAACCTCCTAAGTTTCGAGCTGGACTCAGTGTGCGTTAGTGTGTAGTGTCGTCCGC	GGACAGTTTAGCCCATCTGCTAGGTTTACACTCGGACCTCGTCGACATGCATTCCCTTGGAGCTGCTCAGCTTCTTAGAAAACCTCCTAAGTTTCGAGCTGGACTCAGTGTGCGTTAGTGTGTAGTGTCGTCCGCGCCCCGGGT
ENST00000220592	ENSG00000123908	AGO2	set16	ENSG00000123908	AGO2	-46	11007	11035	29	AGGATTTGAGTCACGCGTGTCTGTTTGGC	0.852151	-55.0785	0.517241	1	1	1	0	1	1	4	1	1	0	7	1	A7	GGACAGTTTAGCCCATCTGCTAGGT	8	1	A8	TGCGTTAGTGTGTAGTGTCGTCCGC	GGACAGTTTAGCCCATCTGCTAGGTTTACACTCGGACCTCGTCGACATGCATTAGGATTTGAGTCACGCGTGTCTGTTTGGCCCTCCTAAGTTTCGAGCTGGACTCAGTGTGCGTTAGTGTGTAGTGTCGTCCGC	GGACAGTTTAGCCCATCTGCTAGGTTTACACTCGGACCTCGTCGACATGCATTAGGATTTGAGTCACGCGTGTCTGTTTGGCCCTCCTAAGTTTCGAGCTGGACTCAGTGTGCGTTAGTGTGTAGTGTCGTCCGCGGATGACAC
ENST00000220592	ENSG00000123908	AGO2	set16	ENSG00000123908	AGO2	-46	10079	10104	26	TTCCAGAACGCGATCAGGCTGGCACT	0.982151	-53.1785	0.576923	1	1	1	1	1	1	5	1	1	0	7	1	A7	GGACAGTTTAGCCCATCTGCTAGGT	8	1	A8	TGCGTTAGTGTGTAGTGTCGTCCGC	GGACAGTTTAGCCCATCTGCTAGGTTTACACTCGGACCTCGTCGACATGCATTTTCCAGAACGCGATCAGGCTGGCACTCCTCCTAAGTTTCGAGCTGGACTCAGTGTGCGTTAGTGTGTAGTGTCGTCCGC	GGACAGTTTAGCCCATCTGCTAGGTTTACACTCGGACCTCGTCGACATGCATTTTCCAGAACGCGATCAGGCTGGCACTCCTCCTAAGTTTCGAGCTGGACTCAGTGTGCGTTAGTGTGTAGTGTCGTCCGCGCTATTGTCGAG
ENST00000220592	ENSG00000123908	AGO2	set16	ENSG00000123908	AGO2	-46	10026	10050	25	ACCAGCTTCTTGGGACAGAGGGACC	0.957849	-52.1785	0.6	1	1	1	1	1	1	5	1	1	0	7	1	A7	GGACAGTTTAGCCCATCTGCTAGGT	8	1	A8	TGCGTTAGTGTGTAGTGTCGTCCGC	GGACAGTTTAGCCCATCTGCTAGGTTTACACTCGGACCTCGTCGACATGCATTACCAGCTTCTTGGGACAGAGGGACCCCTCCTAAGTTTCGAGCTGGACTCAGTGTGCGTTAGTGTGTAGTGTCGTCCGC	GGACAGTTTAGCCCATCTGCTAGGTTTACACTCGGACCTCGTCGACATGCATTACCAGCTTCTTGGGACAGAGGGACCCCTCCTAAGTTTCGAGCTGGACTCAGTGTGCGTTAGTGTGTAGTGTCGTCCGCGTGGACTCATTAG
ENST00000220592	ENSG00000123908	AGO2	set16	ENSG00000123908	AGO2	-46	9023	9051	29	AACTGTCAGATCATCGCCTGTCAACTCAG	0.967849	-53.5785	0.482759	1	1	1	1	1	1	5	1	1	0	7	1	A7	GGACAGTTTAGCCCATCTGCTAGGT	8	1	A8	TGCGTTAGTGTGTAGTGTCGTCCGC	GGACAGTTTAGCCCATCTGCTAGGTTTACACTCGGACCTCGTCGACATGCATTAACTGTCAGATCATCGCCTGTCAACTCAGCCTCCTAAGTTTCGAGCTGGACTCAGTGTGCGTTAGTGTGTAGTGTCGTCCGC	GGACAGTTTAGCCCATCTGCTAGGTTTACACTCGGACCTCGTCGACATGCATTAACTGTCAGATCATCGCCTGTCAACTCAGCCTCCTAAGTTTCGAGCTGGACTCAGTGTGCGTTAGTGTGTAGTGTCGTCCGCCCGAAGGAT
ENST00000220592	ENSG00000123908	AGO2	set16	ENSG00000123908	AGO2	-46	8821	8847	27	ACTTCCTGCAAGTCTGCATCAGACGGT	0.927849	-52.5785	0.518519	1	1	1	1	1	1	5	1	1	0	7	1	A7	GGACAGTTTAGCCCATCTGCTAGGT	8	1	A8	TGCGTTAGTGTGTAGTGTCGTCCGC	GGACAGTTTAGCCCATCTGCTAGGTTTACACTCGGACCTCGTCGACATGCATTACTTCCTGCAAGTCTGCATCAGACGGTCCTCCTAAGTTTCGAGCTGGACTCAGTGTGCGTTAGTGTGTAGTGTCGTCCGC	GGACAGTTTAGCCCATCTGCTAGGTTTACACTCGGACCTCGTCGACATGCATTACTTCCTGCAAGTCTGCATCAGACGGTCCTCCTAAGTTTCGAGCTGGACTCAGTGTGCGTTAGTGTGTAGTGTCGTCCGCGCGGCGGCTAG
ENST00000220592	ENSG00000123908	AGO2	set16	ENSG00000123908	AGO2	-46	8672	8697	26	GTAGGGAGTGAGAGTAACCCGAGGTC	0.887849	-52.0785	0.576923	1	1	1	1	1	1	5	1	1	0	7	1	A7	GGACAGTTTAGCCCATCTGCTAGGT	8	1	A8	TGCGTTAGTGTGTAGTGTCGTCCGC	GGACAGTTTAGCCCATCTGCTAGGTTTACACTCGGACCTCGTCGACATGCATTGTAGGGAGTGAGAGTAACCCGAGGTCCCTCCTAAGTTTCGAGCTGGACTCAGTGTGCGTTAGTGTGTAGTGTCGTCCGC	GGACAGTTTAGCCCATCTGCTAGGTTTACACTCGGACCTCGTCGACATGCATTGTAGGGAGTGAGAGTAACCCGAGGTCCCTCCTAAGTTTCGAGCTGGACTCAGTGTGCGTTAGTGTGTAGTGTCGTCCGCCGGGGCAGCTTG
ENST00000220592	ENSG00000123908	AGO2	set16	ENSG00000123908	AGO2	-46	8507	8536	30	GGAGGCCATTTTCAACCCATTTGTAGGTAA	0.967849	-52.7785	0.433333	1	1	1	1	1	1	5	1	1	0	7	1	A7	GGACAGTTTAGCCCATCTGCTAGGT	8	1	A8	TGCGTTAGTGTGTAGTGTCGTCCGC	GGACAGTTTAGCCCATCTGCTAGGTTTACACTCGGACCTCGTCGACATGCATTGGAGGCCATTTTCAACCCATTTGTAGGTAACCTCCTAAGTTTCGAGCTGGACTCAGTGTGCGTTAGTGTGTAGTGTCGTCCGC	GGACAGTTTAGCCCATCTGCTAGGTTTACACTCGGACCTCGTCGACATGCATTGGAGGCCATTTTCAACCCATTTGTAGGTAACCTCCTAAGTTTCGAGCTGGACTCAGTGTGCGTTAGTGTGTAGTGTCGTCCGCAACCTCCC
ENST00000220592	ENSG00000123908	AGO2	set16	ENSG00000123908	AGO2	-46	8413	8439	27	TCAAGATTTTGCCACACCTGCGCAGGC	0.922151	-53.6785	0.555556	1	1	1	1	1	1	5	1	1	0	7	1	A7	GGACAGTTTAGCCCATCTGCTAGGT	8	1	A8	TGCGTTAGTGTGTAGTGTCGTCCGC	GGACAGTTTAGCCCATCTGCTAGGTTTACACTCGGACCTCGTCGACATGCATTTCAAGATTTTGCCACACCTGCGCAGGCCCTCCTAAGTTTCGAGCTGGACTCAGTGTGCGTTAGTGTGTAGTGTCGTCCGC	GGACAGTTTAGCCCATCTGCTAGGTTTACACTCGGACCTCGTCGACATGCATTTCAAGATTTTGCCACACCTGCGCAGGCCCTCCTAAGTTTCGAGCTGGACTCAGTGTGCGTTAGTGTGTAGTGTCGTCCGCGGCTGCATTAT
ENST00000220592	ENSG00000123908	AGO2	set16	ENSG00000123908	AGO2	-46	7725	7749	25	TGCGTCCTAGTAGCAGGCGGAGCAG	0.992151	-53.0785	0.64	1	1	1	0	1	1	4	1	1	0	7	1	A7	GGACAGTTTAGCCCATCTGCTAGGT	8	1	A8	TGCGTTAGTGTGTAGTGTCGTCCGC	GGACAGTTTAGCCCATCTGCTAGGTTTACACTCGGACCTCGTCGACATGCATTTGCGTCCTAGTAGCAGGCGGAGCAGCCTCCTAAGTTTCGAGCTGGACTCAGTGTGCGTTAGTGTGTAGTGTCGTCCGC	GGACAGTTTAGCCCATCTGCTAGGTTTACACTCGGACCTCGTCGACATGCATTTGCGTCCTAGTAGCAGGCGGAGCAGCCTCCTAAGTTTCGAGCTGGACTCAGTGTGCGTTAGTGTGTAGTGTCGTCCGCCGAGGTTCCTATG
ENST00000220592	ENSG00000123908	AGO2	set16	ENSG00000123908	AGO2	-46	7389	7415	27	GTCTCCACAACAGAGCCACGTGTTGCA	0.932151	-53.7785	0.555556	1	1	1	1	1	0	4	1	1	0	7	1	A7	GGACAGTTTAGCCCATCTGCTAGGT	8	1	A8	TGCGTTAGTGTGTAGTGTCGTCCGC	GGACAGTTTAGCCCATCTGCTAGGTTTACACTCGGACCTCGTCGACATGCATTGTCTCCACAACAGAGCCACGTGTTGCACCTCCTAAGTTTCGAGCTGGACTCAGTGTGCGTTAGTGTGTAGTGTCGTCCGC	GGACAGTTTAGCCCATCTGCTAGGTTTACACTCGGACCTCGTCGACATGCATTGTCTCCACAACAGAGCCACGTGTTGCACCTCCTAAGTTTCGAGCTGGACTCAGTGTGCGTTAGTGTGTAGTGTCGTCCGCTTGGTGTGTAA
ENST00000220592	ENSG00000123908	AGO2	set16	ENSG00000123908	AGO2	-46	9676	9700	25	GCTGGGGGCTGAGGTGAGGACTTAA	0.967849	-52.2785	0.6	1	1	1	0	1	1	4	1	1	0	7	1	A7	GGACAGTTTAGCCCATCTGCTAGGT	8	1	A8	TGCGTTAGTGTGTAGTGTCGTCCGC	GGACAGTTTAGCCCATCTGCTAGGTTTACACTCGGACCTCGTCGACATGCATTGCTGGGGGCTGAGGTGAGGACTTAACCTCCTAAGTTTCGAGCTGGACTCAGTGTGCGTTAGTGTGTAGTGTCGTCCGC	GGACAGTTTAGCCCATCTGCTAGGTTTACACTCGGACCTCGTCGACATGCATTGCTGGGGGCTGAGGTGAGGACTTAACCTCCTAAGTTTCGAGCTGGACTCAGTGTGCGTTAGTGTGTAGTGTCGTCCGCTCAGGGCACCATA
ENST00000220592	ENSG00000123908	AGO2	set16	ENSG00000123908	AGO2	-46	9541	9573	33	TCTTCAGTTCTCTCACTTCTGAGTAAATTCTCA	0.997849	-55.3785	0.363636	1	1	1	0	1	1	4	1	1	0	7	1	A7	GGACAGTTTAGCCCATCTGCTAGGT	8	1	A8	TGCGTTAGTGTGTAGTGTCGTCCGC	GGACAGTTTAGCCCATCTGCTAGGTTTACACTCGGACCTCGTCGACATGCATTTCTTCAGTTCTCTCACTTCTGAGTAAATTCTCACCTCCTAAGTTTCGAGCTGGACTCAGTGTGCGTTAGTGTGTAGTGTCGTCCGC	GGACAGTTTAGCCCATCTGCTAGGTTTACACTCGGACCTCGTCGACATGCATTTCTTCAGTTCTCTCACTTCTGAGTAAATTCTCACCTCCTAAGTTTCGAGCTGGACTCAGTGTGCGTTAGTGTGTAGTGTCGTCCGCAGCTT
ENST00000220592	ENSG00000123908	AGO2	set16	ENSG00000123908	AGO2	-46	9462	9487	26	AGGAAGCTTGCGGTGGATCTGCGTGC	0.872151	-54.2785	0.615385	1	1	1	0	1	1	4	1	1	0	7	1	A7	GGACAGTTTAGCCCATCTGCTAGGT	8	1	A8	TGCGTTAGTGTGTAGTGTCGTCCGC	GGACAGTTTAGCCCATCTGCTAGGTTTACACTCGGACCTCGTCGACATGCATTAGGAAGCTTGCGGTGGATCTGCGTGCCCTCCTAAGTTTCGAGCTGGACTCAGTGTGCGTTAGTGTGTAGTGTCGTCCGC	GGACAGTTTAGCCCATCTGCTAGGTTTACACTCGGACCTCGTCGACATGCATTAGGAAGCTTGCGGTGGATCTGCGTGCCCTCCTAAGTTTCGAGCTGGACTCAGTGTGCGTTAGTGTGTAGTGTCGTCCGCTAGATTGACATT
ENST00000220592	ENSG00000123908	AGO2	set16	ENSG00000123908	AGO2	-46	9285	9309	25	AGCCTCTTGAGGTCGGTCCGCACAG	0.992151	-52.8785	0.64	1	1	1	0	1	1	4	1	1	0	7	1	A7	GGACAGTTTAGCCCATCTGCTAGGT	8	1	A8	TGCGTTAGTGTGTAGTGTCGTCCGC	GGACAGTTTAGCCCATCTGCTAGGTTTACACTCGGACCTCGTCGACATGCATTAGCCTCTTGAGGTCGGTCCGCACAGCCTCCTAAGTTTCGAGCTGGACTCAGTGTGCGTTAGTGTGTAGTGTCGTCCGC	GGACAGTTTAGCCCATCTGCTAGGTTTACACTCGGACCTCGTCGACATGCATTAGCCTCTTGAGGTCGGTCCGCACAGCCTCCTAAGTTTCGAGCTGGACTCAGTGTGCGTTAGTGTGTAGTGTCGTCCGCTCGTTCCTACTTA
ENST00000220592	ENSG00000123908	AGO2	set16	ENSG00000123908	AGO2	-46	8765	8790	26	CAAAACACCAGCTGTGGGCCCTGTGT	0.982151	-52.3785	0.576923	1	1	0	1	1	1	4	1	1	0	7	1	A7	GGACAGTTTAGCCCATCTGCTAGGT	8	1	A8	TGCGTTAGTGTGTAGTGTCGTCCGC	GGACAGTTTAGCCCATCTGCTAGGTTTACACTCGGACCTCGTCGACATGCATTCAAAACACCAGCTGTGGGCCCTGTGTCCTCCTAAGTTTCGAGCTGGACTCAGTGTGCGTTAGTGTGTAGTGTCGTCCGC	GGACAGTTTAGCCCATCTGCTAGGTTTACACTCGGACCTCGTCGACATGCATTCAAAACACCAGCTGTGGGCCCTGTGTCCTCCTAAGTTTCGAGCTGGACTCAGTGTGCGTTAGTGTGTAGTGTCGTCCGCCCCACATCAGGT
ENST00000220592	ENSG00000123908	AGO2	set16	ENSG00000123908	AGO2	-46	8699	8731	33	AATGCTTTGCTTTCAACCCTTAGTTTGTTTTGC	0.937849	-53.3785	0.363636	1	1	1	0	1	1	4	1	1	0	7	1	A7	GGACAGTTTAGCCCATCTGCTAGGT	8	1	A8	TGCGTTAGTGTGTAGTGTCGTCCGC	GGACAGTTTAGCCCATCTGCTAGGTTTACACTCGGACCTCGTCGACATGCATTAATGCTTTGCTTTCAACCCTTAGTTTGTTTTGCCCTCCTAAGTTTCGAGCTGGACTCAGTGTGCGTTAGTGTGTAGTGTCGTCCGC	GGACAGTTTAGCCCATCTGCTAGGTTTACACTCGGACCTCGTCGACATGCATTAATGCTTTGCTTTCAACCCTTAGTTTGTTTTGCCCTCCTAAGTTTCGAGCTGGACTCAGTGTGCGTTAGTGTGTAGTGTCGTCCGCGGGAG
ENST00000220592	ENSG00000123908	AGO2	set16	ENSG00000123908	AGO2	-46	8571	8599	29	GACAGTCGGTGTTGAAGCACCTTTGTGAT	0.992151	-53.5785	0.482759	1	1	1	0	1	1	4	1	1	0	7	1	A7	GGACAGTTTAGCCCATCTGCTAGGT	8	1	A8	TGCGTTAGTGTGTAGTGTCGTCCGC	GGACAGTTTAGCCCATCTGCTAGGTTTACACTCGGACCTCGTCGACATGCATTGACAGTCGGTGTTGAAGCACCTTTGTGATCCTCCTAAGTTTCGAGCTGGACTCAGTGTGCGTTAGTGTGTAGTGTCGTCCGC	GGACAGTTTAGCCCATCTGCTAGGTTTACACTCGGACCTCGTCGACATGCATTGACAGTCGGTGTTGAAGCACCTTTGTGATCCTCCTAAGTTTCGAGCTGGACTCAGTGTGCGTTAGTGTGTAGTGTCGTCCGCTTCCCGTTT
ENST00000220592	ENSG00000123908	AGO2	set16	ENSG00000123908	AGO2	-46	8360	8385	26	GTTATGCCGTCCCGTGCAGAGAACCC	0.932151	-53.3785	0.615385	1	1	1	0	1	1	4	1	1	0	7	1	A7	GGACAGTTTAGCCCATCTGCTAGGT	8	1	A8	TGCGTTAGTGTGTAGTGTCGTCCGC	GGACAGTTTAGCCCATCTGCTAGGTTTACACTCGGACCTCGTCGACATGCATTGTTATGCCGTCCCGTGCAGAGAACCCCCTCCTAAGTTTCGAGCTGGACTCAGTGTGCGTTAGTGTGTAGTGTCGTCCGC	GGACAGTTTAGCCCATCTGCTAGGTTTACACTCGGACCTCGTCGACATGCATTGTTATGCCGTCCCGTGCAGAGAACCCCCTCCTAAGTTTCGAGCTGGACTCAGTGTGCGTTAGTGTGTAGTGTCGTCCGCCGCAGTCTTATG
ENST00000220592	ENSG00000123908	AGO2	set16	ENSG00000123908	AGO2	-46	7951	7976	26	GGCACCGTAATGGCACTGGTGTGACT	0.992151	-52.5785	0.576923	1	1	1	0	1	1	4	1	1	0	7	1	A7	GGACAGTTTAGCCCATCTGCTAGGT	8	1	A8	TGCGTTAGTGTGTAGTGTCGTCCGC	GGACAGTTTAGCCCATCTGCTAGGTTTACACTCGGACCTCGTCGACATGCATTGGCACCGTAATGGCACTGGTGTGACTCCTCCTAAGTTTCGAGCTGGACTCAGTGTGCGTTAGTGTGTAGTGTCGTCCGC	GGACAGTTTAGCCCATCTGCTAGGTTTACACTCGGACCTCGTCGACATGCATTGGCACCGTAATGGCACTGGTGTGACTCCTCCTAAGTTTCGAGCTGGACTCAGTGTGCGTTAGTGTGTAGTGTCGTCCGCTCCCCCACTCAC
ENST00000220592	ENSG00000123908	AGO2	set16	ENSG00000123908	AGO2	-46	7894	7923	30	CTGAAAAACTTCTTGCTGGGTGTGACACAG	0.967849	-53.2785	0.466667	1	1	0	1	1	1	4	1	1	0	7	1	A7	GGACAGTTTAGCCCATCTGCTAGGT	8	1	A8	TGCGTTAGTGTGTAGTGTCGTCCGC	GGACAGTTTAGCCCATCTGCTAGGTTTACACTCGGACCTCGTCGACATGCATTCTGAAAAACTTCTTGCTGGGTGTGACACAGCCTCCTAAGTTTCGAGCTGGACTCAGTGTGCGTTAGTGTGTAGTGTCGTCCGC	GGACAGTTTAGCCCATCTGCTAGGTTTACACTCGGACCTCGTCGACATGCATTCTGAAAAACTTCTTGCTGGGTGTGACACAGCCTCCTAAGTTTCGAGCTGGACTCAGTGTGCGTTAGTGTGTAGTGTCGTCCGCCTCAGTGT
ENST00000220592	ENSG00000123908	AGO2	set16	ENSG00000123908	AGO2	-46	7841	7865	25	GGGCTACAGCACACGCTGCTACTCC	0.982151	-53.0785	0.64	1	1	1	0	1	1	4	1	1	0	7	1	A7	GGACAGTTTAGCCCATCTGCTAGGT	8	1	A8	TGCGTTAGTGTGTAGTGTCGTCCGC	GGACAGTTTAGCCCATCTGCTAGGTTTACACTCGGACCTCGTCGACATGCATTGGGCTACAGCACACGCTGCTACTCCCCTCCTAAGTTTCGAGCTGGACTCAGTGTGCGTTAGTGTGTAGTGTCGTCCGC	GGACAGTTTAGCCCATCTGCTAGGTTTACACTCGGACCTCGTCGACATGCATTGGGCTACAGCACACGCTGCTACTCCCCTCCTAAGTTTCGAGCTGGACTCAGTGTGCGTTAGTGTGTAGTGTCGTCCGCATGAGTATAACAC
ENST00000220592	ENSG00000123908	AGO2	set16	ENSG00000123908	AGO2	-46	12101	12130	30	ACAATGGTCCATTTTCATCAAGCTATGGCC	0.977849	-53.0785	0.433333	1	1	1	1	1	1	5	1	1	0	7	1	A7	GGACAGTTTAGCCCATCTGCTAGGT	8	1	A8	TGCGTTAGTGTGTAGTGTCGTCCGC	GGACAGTTTAGCCCATCTGCTAGGTTTACACTCGGACCTCGTCGACATGCATTACAATGGTCCATTTTCATCAAGCTATGGCCCCTCCTAAGTTTCGAGCTGGACTCAGTGTGCGTTAGTGTGTAGTGTCGTCCGC	GGACAGTTTAGCCCATCTGCTAGGTTTACACTCGGACCTCGTCGACATGCATTACAATGGTCCATTTTCATCAAGCTATGGCCCCTCCTAAGTTTCGAGCTGGACTCAGTGTGCGTTAGTGTGTAGTGTCGTCCGCAGACTCAC
ENST00000220592	ENSG00000123908	AGO2	set16	ENSG00000123908	AGO2	-46	11881	11914	34	TCTGCCTAATATTTTTGCATACTCTGAAACTCAC	0.972151	-55.1785	0.352941	1	1	1	1	1	1	5	1	1	0	7	1	A7	GGACAGTTTAGCCCATCTGCTAGGT	8	1	A8	TGCGTTAGTGTGTAGTGTCGTCCGC	GGACAGTTTAGCCCATCTGCTAGGTTTACACTCGGACCTCGTCGACATGCATTTCTGCCTAATATTTTTGCATACTCTGAAACTCACCCTCCTAAGTTTCGAGCTGGACTCAGTGTGCGTTAGTGTGTAGTGTCGTCCGC	GGACAGTTTAGCCCATCTGCTAGGTTTACACTCGGACCTCGTCGACATGCATTTCTGCCTAATATTTTTGCATACTCTGAAACTCACCCTCCTAAGTTTCGAGCTGGACTCAGTGTGCGTTAGTGTGTAGTGTCGTCCGCAGAA
ENST00000220592	ENSG00000123908	AGO2	set16	ENSG00000123908	AGO2	-46	1900	1927	28	GTGAGTGACGTCTGCTCCCAGAAAGATG	0.992151	-53.7785	0.535714	1	1	1	1	1	1	5	1	1	0	7	1	A7	GGACAGTTTAGCCCATCTGCTAGGT	8	1	A8	TGCGTTAGTGTGTAGTGTCGTCCGC	GGACAGTTTAGCCCATCTGCTAGGTTTACACTCGGACCTCGTCGACATGCATTGTGAGTGACGTCTGCTCCCAGAAAGATGCCTCCTAAGTTTCGAGCTGGACTCAGTGTGCGTTAGTGTGTAGTGTCGTCCGC	GGACAGTTTAGCCCATCTGCTAGGTTTACACTCGGACCTCGTCGACATGCATTGTGAGTGACGTCTGCTCCCAGAAAGATGCCTCCTAAGTTTCGAGCTGGACTCAGTGTGCGTTAGTGTGTAGTGTCGTCCGCGCTTCAGTGG
ENST00000220592	ENSG00000123908	AGO2	set16	ENSG00000123908	AGO2	-46	1509	1535	27	AGGACTTCAGATGGACTTCCGTGCACT	0.927849	-52.5785	0.518519	1	1	1	1	1	1	5	1	1	0	7	1	A7	GGACAGTTTAGCCCATCTGCTAGGT	8	1	A8	TGCGTTAGTGTGTAGTGTCGTCCGC	GGACAGTTTAGCCCATCTGCTAGGTTTACACTCGGACCTCGTCGACATGCATTAGGACTTCAGATGGACTTCCGTGCACTCCTCCTAAGTTTCGAGCTGGACTCAGTGTGCGTTAGTGTGTAGTGTCGTCCGC	GGACAGTTTAGCCCATCTGCTAGGTTTACACTCGGACCTCGTCGACATGCATTAGGACTTCAGATGGACTTCCGTGCACTCCTCCTAAGTTTCGAGCTGGACTCAGTGTGCGTTAGTGTGTAGTGTCGTCCGCCCACCCGGCGT
ENST00000220592	ENSG00000123908	AGO2	set16	ENSG00000123908	AGO2	-46	6957	6985	29	CACAGGAAAATGTCGTATGGCTTGTCTGG	0.877849	-51.9785	0.482759	1	1	0	1	1	1	4	1	1	0	7	1	A7	GGACAGTTTAGCCCATCTGCTAGGT	8	1	A8	TGCGTTAGTGTGTAGTGTCGTCCGC	GGACAGTTTAGCCCATCTGCTAGGTTTACACTCGGACCTCGTCGACATGCATTCACAGGAAAATGTCGTATGGCTTGTCTGGCCTCCTAAGTTTCGAGCTGGACTCAGTGTGCGTTAGTGTGTAGTGTCGTCCGC	GGACAGTTTAGCCCATCTGCTAGGTTTACACTCGGACCTCGTCGACATGCATTCACAGGAAAATGTCGTATGGCTTGTCTGGCCTCCTAAGTTTCGAGCTGGACTCAGTGTGCGTTAGTGTGTAGTGTCGTCCGCGTGCTACTG
ENST00000220592	ENSG00000123908	AGO2	set16	ENSG00000123908	AGO2	-46	6928	6955	28	CCACTGGGATTGTCCACTGTCTGGATTA	0.987849	-52.8785	0.5	1	1	1	0	1	1	4	1	1	0	7	1	A7	GGACAGTTTAGCCCATCTGCTAGGT	8	1	A8	TGCGTTAGTGTGTAGTGTCGTCCGC	GGACAGTTTAGCCCATCTGCTAGGTTTACACTCGGACCTCGTCGACATGCATTCCACTGGGATTGTCCACTGTCTGGATTACCTCCTAAGTTTCGAGCTGGACTCAGTGTGCGTTAGTGTGTAGTGTCGTCCGC	GGACAGTTTAGCCCATCTGCTAGGTTTACACTCGGACCTCGTCGACATGCATTCCACTGGGATTGTCCACTGTCTGGATTACCTCCTAAGTTTCGAGCTGGACTCAGTGTGCGTTAGTGTGTAGTGTCGTCCGCGAAGATCTCG
ENST00000220592	ENSG00000123908	AGO2	set16	ENSG00000123908	AGO2	-46	6835	6862	28	CTTTTAACTGTCCAGCGGGTCACAGTCC	0.992151	-53.2785	0.535714	1	1	1	0	1	1	4	1	1	0	7	1	A7	GGACAGTTTAGCCCATCTGCTAGGT	8	1	A8	TGCGTTAGTGTGTAGTGTCGTCCGC	GGACAGTTTAGCCCATCTGCTAGGTTTACACTCGGACCTCGTCGACATGCATTCTTTTAACTGTCCAGCGGGTCACAGTCCCCTCCTAAGTTTCGAGCTGGACTCAGTGTGCGTTAGTGTGTAGTGTCGTCCGC	GGACAGTTTAGCCCATCTGCTAGGTTTACACTCGGACCTCGTCGACATGCATTCTTTTAACTGTCCAGCGGGTCACAGTCCCCTCCTAAGTTTCGAGCTGGACTCAGTGTGCGTTAGTGTGTAGTGTCGTCCGCGAAGGGAATT
ENST00000220592	ENSG00000123908	AGO2	set16	ENSG00000123908	AGO2	-46	6709	6734	26	GACGTGTGGCCGGTCTATCCTAGCGT	0.922151	-53.7785	0.615385	1	1	1	0	1	1	4	1	1	0	7	1	A7	GGACAGTTTAGCCCATCTGCTAGGT	8	1	A8	TGCGTTAGTGTGTAGTGTCGTCCGC	GGACAGTTTAGCCCATCTGCTAGGTTTACACTCGGACCTCGTCGACATGCATTGACGTGTGGCCGGTCTATCCTAGCGTCCTCCTAAGTTTCGAGCTGGACTCAGTGTGCGTTAGTGTGTAGTGTCGTCCGC	GGACAGTTTAGCCCATCTGCTAGGTTTACACTCGGACCTCGTCGACATGCATTGACGTGTGGCCGGTCTATCCTAGCGTCCTCCTAAGTTTCGAGCTGGACTCAGTGTGCGTTAGTGTGTAGTGTCGTCCGCCTAGGGGCGTTA
ENST00000220592	ENSG00000123908	AGO2	set16	ENSG00000123908	AGO2	-46	6231	6255	25	AACAGCGTGGAGGTCACTGCCTGCT	0.977849	-52.4785	0.6	1	1	1	0	1	1	4	1	1	0	7	1	A7	GGACAGTTTAGCCCATCTGCTAGGT	8	1	A8	TGCGTTAGTGTGTAGTGTCGTCCGC	GGACAGTTTAGCCCATCTGCTAGGTTTACACTCGGACCTCGTCGACATGCATTAACAGCGTGGAGGTCACTGCCTGCTCCTCCTAAGTTTCGAGCTGGACTCAGTGTGCGTTAGTGTGTAGTGTCGTCCGC	GGACAGTTTAGCCCATCTGCTAGGTTTACACTCGGACCTCGTCGACATGCATTAACAGCGTGGAGGTCACTGCCTGCTCCTCCTAAGTTTCGAGCTGGACTCAGTGTGCGTTAGTGTGTAGTGTCGTCCGCGCTCTGCTTGCTC
ENST00000220592	ENSG00000123908	AGO2	set16	ENSG00000123908	AGO2	-46	14165	14193	29	GTTTCGGGTGAGTGCTGAGGAATAGAGAA	0.997849	-53.8785	0.482759	1	1	1	1	1	1	5	1	1	0	7	1	A7	GGACAGTTTAGCCCATCTGCTAGGT	8	1	A8	TGCGTTAGTGTGTAGTGTCGTCCGC	GGACAGTTTAGCCCATCTGCTAGGTTTACACTCGGACCTCGTCGACATGCATTGTTTCGGGTGAGTGCTGAGGAATAGAGAACCTCCTAAGTTTCGAGCTGGACTCAGTGTGCGTTAGTGTGTAGTGTCGTCCGC	GGACAGTTTAGCCCATCTGCTAGGTTTACACTCGGACCTCGTCGACATGCATTGTTTCGGGTGAGTGCTGAGGAATAGAGAACCTCCTAAGTTTCGAGCTGGACTCAGTGTGCGTTAGTGTGTAGTGTCGTCCGCTAACCTTCA
ENST00000220592	ENSG00000123908	AGO2	set16	ENSG00000123908	AGO2	-46	14138	14163	26	TGTGAAGACGGGCTCTCTGGAGAGAC	0.967849	-53.1785	0.576923	1	1	1	1	1	1	5	1	1	0	7	1	A7	GGACAGTTTAGCCCATCTGCTAGGT	8	1	A8	TGCGTTAGTGTGTAGTGTCGTCCGC	GGACAGTTTAGCCCATCTGCTAGGTTTACACTCGGACCTCGTCGACATGCATTTGTGAAGACGGGCTCTCTGGAGAGACCCTCCTAAGTTTCGAGCTGGACTCAGTGTGCGTTAGTGTGTAGTGTCGTCCGC	GGACAGTTTAGCCCATCTGCTAGGTTTACACTCGGACCTCGTCGACATGCATTTGTGAAGACGGGCTCTCTGGAGAGACCCTCCTAAGTTTCGAGCTGGACTCAGTGTGCGTTAGTGTGTAGTGTCGTCCGCCTATTTATCCAT
ENST00000220592	ENSG00000123908	AGO2	set16	ENSG00000123908	AGO2	-46	13112	13145	34	CATGGTAAGTCATCAACCTATCTCATTTTCTTAC	0.927849	-53.9785	0.352941	1	1	1	1	1	1	5	1	1	0	7	1	A7	GGACAGTTTAGCCCATCTGCTAGGT	8	1	A8	TGCGTTAGTGTGTAGTGTCGTCCGC	GGACAGTTTAGCCCATCTGCTAGGTTTACACTCGGACCTCGTCGACATGCATTCATGGTAAGTCATCAACCTATCTCATTTTCTTACCCTCCTAAGTTTCGAGCTGGACTCAGTGTGCGTTAGTGTGTAGTGTCGTCCGC	GGACAGTTTAGCCCATCTGCTAGGTTTACACTCGGACCTCGTCGACATGCATTCATGGTAAGTCATCAACCTATCTCATTTTCTTACCCTCCTAAGTTTCGAGCTGGACTCAGTGTGCGTTAGTGTGTAGTGTCGTCCGCGTCA
ENST00000220592	ENSG00000123908	AGO2	set16	ENSG00000123908	AGO2	-46	12685	12714	30	ATTATAATACACTGTAGCAGTTGGCTGGGG	0.917849	-52.5785	0.433333	1	1	1	1	1	1	5	1	1	0	7	1	A7	GGACAGTTTAGCCCATCTGCTAGGT	8	1	A8	TGCGTTAGTGTGTAGTGTCGTCCGC	GGACAGTTTAGCCCATCTGCTAGGTTTACACTCGGACCTCGTCGACATGCATTATTATAATACACTGTAGCAGTTGGCTGGGGCCTCCTAAGTTTCGAGCTGGACTCAGTGTGCGTTAGTGTGTAGTGTCGTCCGC	GGACAGTTTAGCCCATCTGCTAGGTTTACACTCGGACCTCGTCGACATGCATTATTATAATACACTGTAGCAGTTGGCTGGGGCCTCCTAAGTTTCGAGCTGGACTCAGTGTGCGTTAGTGTGTAGTGTCGTCCGCAAGAACGG
ENST00000220592	ENSG00000123908	AGO2	set16	ENSG00000123908	AGO2	-46	10273	10298	26	CGGCTCCAGACTGCATGGCATCACAG	0.942151	-53.3785	0.615385	1	1	1	1	1	1	5	1	1	0	7	1	A7	GGACAGTTTAGCCCATCTGCTAGGT	8	1	A8	TGCGTTAGTGTGTAGTGTCGTCCGC	GGACAGTTTAGCCCATCTGCTAGGTTTACACTCGGACCTCGTCGACATGCATTCGGCTCCAGACTGCATGGCATCACAGCCTCCTAAGTTTCGAGCTGGACTCAGTGTGCGTTAGTGTGTAGTGTCGTCCGC	GGACAGTTTAGCCCATCTGCTAGGTTTACACTCGGACCTCGTCGACATGCATTCGGCTCCAGACTGCATGGCATCACAGCCTCCTAAGTTTCGAGCTGGACTCAGTGTGCGTTAGTGTGTAGTGTCGTCCGCCATAAGGGCAAT
ENST00000220592	ENSG00000123908	AGO2	set16	ENSG00000123908	AGO2	-46	10246	10271	26	TTACAAGTCAGGGGCTGAGGAGCGGA	0.932151	-53.6785	0.576923	1	1	1	1	1	1	5	1	1	0	7	1	A7	GGACAGTTTAGCCCATCTGCTAGGT	8	1	A8	TGCGTTAGTGTGTAGTGTCGTCCGC	GGACAGTTTAGCCCATCTGCTAGGTTTACACTCGGACCTCGTCGACATGCATTTTACAAGTCAGGGGCTGAGGAGCGGACCTCCTAAGTTTCGAGCTGGACTCAGTGTGCGTTAGTGTGTAGTGTCGTCCGC	GGACAGTTTAGCCCATCTGCTAGGTTTACACTCGGACCTCGTCGACATGCATTTTACAAGTCAGGGGCTGAGGAGCGGACCTCCTAAGTTTCGAGCTGGACTCAGTGTGCGTTAGTGTGTAGTGTCGTCCGCTGATGAACTTGC
ENST00000220592	ENSG00000123908	AGO2	set16	ENSG00000123908	AGO2	-46	11196	11229	34	TCCTGTATTTAATGAGTAATTAGCCACTTTGCTG	0.997849	-54.5785	0.352941	1	1	1	1	1	1	5	1	1	0	7	1	A7	GGACAGTTTAGCCCATCTGCTAGGT	8	1	A8	TGCGTTAGTGTGTAGTGTCGTCCGC	GGACAGTTTAGCCCATCTGCTAGGTTTACACTCGGACCTCGTCGACATGCATTTCCTGTATTTAATGAGTAATTAGCCACTTTGCTGCCTCCTAAGTTTCGAGCTGGACTCAGTGTGCGTTAGTGTGTAGTGTCGTCCGC	GGACAGTTTAGCCCATCTGCTAGGTTTACACTCGGACCTCGTCGACATGCATTTCCTGTATTTAATGAGTAATTAGCCACTTTGCTGCCTCCTAAGTTTCGAGCTGGACTCAGTGTGCGTTAGTGTGTAGTGTCGTCCGCGCAC
ENST00000220592	ENSG00000123908	AGO2	set16	ENSG00000123908	AGO2	-46	11037	11064	28	TTTCAATGCAACGCCACCCTCCATACTG	0.937849	-52.1785	0.5	1	1	1	1	1	1	5	1	1	0	7	1	A7	GGACAGTTTAGCCCATCTGCTAGGT	8	1	A8	TGCGTTAGTGTGTAGTGTCGTCCGC	GGACAGTTTAGCCCATCTGCTAGGTTTACACTCGGACCTCGTCGACATGCATTTTTCAATGCAACGCCACCCTCCATACTGCCTCCTAAGTTTCGAGCTGGACTCAGTGTGCGTTAGTGTGTAGTGTCGTCCGC	GGACAGTTTAGCCCATCTGCTAGGTTTACACTCGGACCTCGTCGACATGCATTTTTCAATGCAACGCCACCCTCCATACTGCCTCCTAAGTTTCGAGCTGGACTCAGTGTGCGTTAGTGTGTAGTGTCGTCCGCGGTGCGACTA
ENST00000220592	ENSG00000123908	AGO2	set16	ENSG00000123908	AGO2	-46	7221	7246	26	TCAGCGTGTGTGTGTGTAACAGGGGC	0.992151	-52.6785	0.576923	1	1	1	0	1	1	4	1	1	0	7	1	A7	GGACAGTTTAGCCCATCTGCTAGGT	8	1	A8	TGCGTTAGTGTGTAGTGTCGTCCGC	GGACAGTTTAGCCCATCTGCTAGGTTTACACTCGGACCTCGTCGACATGCATTTCAGCGTGTGTGTGTGTAACAGGGGCCCTCCTAAGTTTCGAGCTGGACTCAGTGTGCGTTAGTGTGTAGTGTCGTCCGC	GGACAGTTTAGCCCATCTGCTAGGTTTACACTCGGACCTCGTCGACATGCATTTCAGCGTGTGTGTGTGTAACAGGGGCCCTCCTAAGTTTCGAGCTGGACTCAGTGTGCGTTAGTGTGTAGTGTCGTCCGCTTGGCAATACAC
ENST00000220592	ENSG00000123908	AGO2	set16	ENSG00000123908	AGO2	-46	7115	7141	27	AGAGTGCAACTCCTCGGTCACTTTGGG	0.992151	-53.1785	0.555556	1	1	1	0	1	1	4	1	1	0	7	1	A7	GGACAGTTTAGCCCATCTGCTAGGT	8	1	A8	TGCGTTAGTGTGTAGTGTCGTCCGC	GGACAGTTTAGCCCATCTGCTAGGTTTACACTCGGACCTCGTCGACATGCATTAGAGTGCAACTCCTCGGTCACTTTGGGCCTCCTAAGTTTCGAGCTGGACTCAGTGTGCGTTAGTGTGTAGTGTCGTCCGC	GGACAGTTTAGCCCATCTGCTAGGTTTACACTCGGACCTCGTCGACATGCATTAGAGTGCAACTCCTCGGTCACTTTGGGCCTCCTAAGTTTCGAGCTGGACTCAGTGTGCGTTAGTGTGTAGTGTCGTCCGCAGAATCATAGA
ENST00000220592	ENSG00000123908	AGO2	set16	ENSG00000123908	AGO2	-46	10106	10134	29	CTTTAAAGGCACAGAGTCTGAGACTGGGT	0.987849	-53.6785	0.482759	1	1	1	1	1	1	5	1	1	0	7	1	A7	GGACAGTTTAGCCCATCTGCTAGGT	8	1	A8	TGCGTTAGTGTGTAGTGTCGTCCGC	GGACAGTTTAGCCCATCTGCTAGGTTTACACTCGGACCTCGTCGACATGCATTCTTTAAAGGCACAGAGTCTGAGACTGGGTCCTCCTAAGTTTCGAGCTGGACTCAGTGTGCGTTAGTGTGTAGTGTCGTCCGC	GGACAGTTTAGCCCATCTGCTAGGTTTACACTCGGACCTCGTCGACATGCATTCTTTAAAGGCACAGAGTCTGAGACTGGGTCCTCCTAAGTTTCGAGCTGGACTCAGTGTGCGTTAGTGTGTAGTGTCGTCCGCGTGCGTAAT
ENST00000220592	ENSG00000123908	AGO2	set16	ENSG00000123908	AGO2	-46	609	633	25	AAGTGCCTCATGACCACGTCCAGGG	0.897849	-51.2785	0.6	1	1	1	1	1	1	5	1	1	0	7	1	A7	GGACAGTTTAGCCCATCTGCTAGGT	8	1	A8	TGCGTTAGTGTGTAGTGTCGTCCGC	GGACAGTTTAGCCCATCTGCTAGGTTTACACTCGGACCTCGTCGACATGCATTAAGTGCCTCATGACCACGTCCAGGGCCTCCTAAGTTTCGAGCTGGACTCAGTGTGCGTTAGTGTGTAGTGTCGTCCGC	GGACAGTTTAGCCCATCTGCTAGGTTTACACTCGGACCTCGTCGACATGCATTAAGTGCCTCATGACCACGTCCAGGGCCTCCTAAGTTTCGAGCTGGACTCAGTGTGCGTTAGTGTGTAGTGTCGTCCGCCATCGGGACTGCT
ENST00000378024	ENSG00000124942	AHNAK	set16	ENSG00000124942	AHNAK	-46	17427	17455	29	AAATTGATGCTTCTGGTGAGCCAGTGACA	0.957849	-53.0785	0.448276	1	1	1	1	1	1	5	1	1	0	9	1	A9	TGTCCTGCCAAGCCGGTTATGTTCT	10	1	A10	GTTACTTCGGGTCCATGACCCAGTC	TGTCCTGCCAAGCCGGTTATGTTCTTTACACTCGGACCTCGTCGACATGCATTAAATTGATGCTTCTGGTGAGCCAGTGACACCTCCTAAGTTTCGAGCTGGACTCAGTGGTTACTTCGGGTCCATGACCCAGTC	TGTCCTGCCAAGCCGGTTATGTTCTTTACACTCGGACCTCGTCGACATGCATTAAATTGATGCTTCTGGTGAGCCAGTGACACCTCCTAAGTTTCGAGCTGGACTCAGTGGTTACTTCGGGTCCATGACCCAGTCGGAGTGGCT
ENST00000378024	ENSG00000124942	AHNAK	set16	ENSG00000124942	AHNAK	-46	17215	17247	33	GGTAAATTTGGGGATCTTCATTTTAGGGAATGT	0.987849	-53.6785	0.363636	1	1	1	1	1	1	5	1	1	0	9	1	A9	TGTCCTGCCAAGCCGGTTATGTTCT	10	1	A10	GTTACTTCGGGTCCATGACCCAGTC	TGTCCTGCCAAGCCGGTTATGTTCTTTACACTCGGACCTCGTCGACATGCATTGGTAAATTTGGGGATCTTCATTTTAGGGAATGTCCTCCTAAGTTTCGAGCTGGACTCAGTGGTTACTTCGGGTCCATGACCCAGTC	TGTCCTGCCAAGCCGGTTATGTTCTTTACACTCGGACCTCGTCGACATGCATTGGTAAATTTGGGGATCTTCATTTTAGGGAATGTCCTCCTAAGTTTCGAGCTGGACTCAGTGGTTACTTCGGGTCCATGACCCAGTCTGACC
ENST00000378024	ENSG00000124942	AHNAK	set16	ENSG00000124942	AHNAK	-46	17691	17721	31	AAAGGTACCGAATTTCAGCTTCCCGTGTTTC	0.912151	-54.6785	0.451613	1	1	1	1	1	1	5	1	1	0	9	1	A9	TGTCCTGCCAAGCCGGTTATGTTCT	10	1	A10	GTTACTTCGGGTCCATGACCCAGTC	TGTCCTGCCAAGCCGGTTATGTTCTTTACACTCGGACCTCGTCGACATGCATTAAAGGTACCGAATTTCAGCTTCCCGTGTTTCCCTCCTAAGTTTCGAGCTGGACTCAGTGGTTACTTCGGGTCCATGACCCAGTC	TGTCCTGCCAAGCCGGTTATGTTCTTTACACTCGGACCTCGTCGACATGCATTAAAGGTACCGAATTTCAGCTTCCCGTGTTTCCCTCCTAAGTTTCGAGCTGGACTCAGTGGTTACTTCGGGTCCATGACCCAGTCTTGTCTT
ENST00000378024	ENSG00000124942	AHNAK	set16	ENSG00000124942	AHNAK	-46	6170	6200	31	TTGAAGTGCATCTCAGGCATCTTAAACTTGG	0.977849	-53.7785	0.419355	1	1	1	1	1	1	5	1	1	0	9	1	A9	TGTCCTGCCAAGCCGGTTATGTTCT	10	1	A10	GTTACTTCGGGTCCATGACCCAGTC	TGTCCTGCCAAGCCGGTTATGTTCTTTACACTCGGACCTCGTCGACATGCATTTTGAAGTGCATCTCAGGCATCTTAAACTTGGCCTCCTAAGTTTCGAGCTGGACTCAGTGGTTACTTCGGGTCCATGACCCAGTC	TGTCCTGCCAAGCCGGTTATGTTCTTTACACTCGGACCTCGTCGACATGCATTTTGAAGTGCATCTCAGGCATCTTAAACTTGGCCTCCTAAGTTTCGAGCTGGACTCAGTGGTTACTTCGGGTCCATGACCCAGTCAGTCAGT
ENST00000378024	ENSG00000124942	AHNAK	set16	ENSG00000124942	AHNAK	-46	18191	18219	29	TGCTTAGTAAACAGGAGCTCTCAGCAGTC	0.982151	-54.4785	0.482759	1	1	1	1	1	1	5	1	1	0	9	1	A9	TGTCCTGCCAAGCCGGTTATGTTCT	10	1	A10	GTTACTTCGGGTCCATGACCCAGTC	TGTCCTGCCAAGCCGGTTATGTTCTTTACACTCGGACCTCGTCGACATGCATTTGCTTAGTAAACAGGAGCTCTCAGCAGTCCCTCCTAAGTTTCGAGCTGGACTCAGTGGTTACTTCGGGTCCATGACCCAGTC	TGTCCTGCCAAGCCGGTTATGTTCTTTACACTCGGACCTCGTCGACATGCATTTGCTTAGTAAACAGGAGCTCTCAGCAGTCCCTCCTAAGTTTCGAGCTGGACTCAGTGGTTACTTCGGGTCCATGACCCAGTCGTCAATCGT
ENST00000378024	ENSG00000124942	AHNAK	set16	ENSG00000124942	AHNAK	-46	18114	18140	27	TTGCACATGGGCTGGACGAACTTGGAA	0.977849	-52.4785	0.518519	1	1	1	1	1	1	5	1	1	0	9	1	A9	TGTCCTGCCAAGCCGGTTATGTTCT	10	1	A10	GTTACTTCGGGTCCATGACCCAGTC	TGTCCTGCCAAGCCGGTTATGTTCTTTACACTCGGACCTCGTCGACATGCATTTTGCACATGGGCTGGACGAACTTGGAACCTCCTAAGTTTCGAGCTGGACTCAGTGGTTACTTCGGGTCCATGACCCAGTC	TGTCCTGCCAAGCCGGTTATGTTCTTTACACTCGGACCTCGTCGACATGCATTTTGCACATGGGCTGGACGAACTTGGAACCTCCTAAGTTTCGAGCTGGACTCAGTGGTTACTTCGGGTCCATGACCCAGTCGCGGTTTGAGC
ENST00000378024	ENSG00000124942	AHNAK	set16	ENSG00000124942	AHNAK	-46	10855	10884	30	AGGCATGGAGATCTTGGGAGCTTTGATATT	0.972151	-54.0785	0.433333	1	1	1	1	1	1	5	1	1	0	9	1	A9	TGTCCTGCCAAGCCGGTTATGTTCT	10	1	A10	GTTACTTCGGGTCCATGACCCAGTC	TGTCCTGCCAAGCCGGTTATGTTCTTTACACTCGGACCTCGTCGACATGCATTAGGCATGGAGATCTTGGGAGCTTTGATATTCCTCCTAAGTTTCGAGCTGGACTCAGTGGTTACTTCGGGTCCATGACCCAGTC	TGTCCTGCCAAGCCGGTTATGTTCTTTACACTCGGACCTCGTCGACATGCATTAGGCATGGAGATCTTGGGAGCTTTGATATTCCTCCTAAGTTTCGAGCTGGACTCAGTGGTTACTTCGGGTCCATGACCCAGTCCATAGCGG
ENST00000378024	ENSG00000124942	AHNAK	set16	ENSG00000124942	AHNAK	-46	17659	17689	31	CTTTAACTTTCCCACCTTCCAGAGACACTTC	0.942151	-54.6785	0.451613	1	1	1	1	1	1	5	1	1	0	9	1	A9	TGTCCTGCCAAGCCGGTTATGTTCT	10	1	A10	GTTACTTCGGGTCCATGACCCAGTC	TGTCCTGCCAAGCCGGTTATGTTCTTTACACTCGGACCTCGTCGACATGCATTCTTTAACTTTCCCACCTTCCAGAGACACTTCCCTCCTAAGTTTCGAGCTGGACTCAGTGGTTACTTCGGGTCCATGACCCAGTC	TGTCCTGCCAAGCCGGTTATGTTCTTTACACTCGGACCTCGTCGACATGCATTCTTTAACTTTCCCACCTTCCAGAGACACTTCCCTCCTAAGTTTCGAGCTGGACTCAGTGGTTACTTCGGGTCCATGACCCAGTCCCACACT
ENST00000378024	ENSG00000124942	AHNAK	set16	ENSG00000124942	AHNAK	-46	17606	17631	26	CGGGGTGGAAGGTCCAGAGAACTCTC	0.942151	-53.5785	0.615385	1	1	1	1	1	1	5	1	1	0	9	1	A9	TGTCCTGCCAAGCCGGTTATGTTCT	10	1	A10	GTTACTTCGGGTCCATGACCCAGTC	TGTCCTGCCAAGCCGGTTATGTTCTTTACACTCGGACCTCGTCGACATGCATTCGGGGTGGAAGGTCCAGAGAACTCTCCCTCCTAAGTTTCGAGCTGGACTCAGTGGTTACTTCGGGTCCATGACCCAGTC	TGTCCTGCCAAGCCGGTTATGTTCTTTACACTCGGACCTCGTCGACATGCATTCGGGGTGGAAGGTCCAGAGAACTCTCCCTCCTAAGTTTCGAGCTGGACTCAGTGGTTACTTCGGGTCCATGACCCAGTCGGATAGCTGATG
ENST00000378024	ENSG00000124942	AHNAK	set16	ENSG00000124942	AHNAK	-46	17575	17604	30	TTCATCACTGAATGAATTTGAGCGGTGCCG	0.972151	-53.8785	0.466667	1	1	1	1	1	1	5	1	1	0	9	1	A9	TGTCCTGCCAAGCCGGTTATGTTCT	10	1	A10	GTTACTTCGGGTCCATGACCCAGTC	TGTCCTGCCAAGCCGGTTATGTTCTTTACACTCGGACCTCGTCGACATGCATTTTCATCACTGAATGAATTTGAGCGGTGCCGCCTCCTAAGTTTCGAGCTGGACTCAGTGGTTACTTCGGGTCCATGACCCAGTC	TGTCCTGCCAAGCCGGTTATGTTCTTTACACTCGGACCTCGTCGACATGCATTTTCATCACTGAATGAATTTGAGCGGTGCCGCCTCCTAAGTTTCGAGCTGGACTCAGTGGTTACTTCGGGTCCATGACCCAGTCCTGCACCT
ENST00000378024	ENSG00000124942	AHNAK	set16	ENSG00000124942	AHNAK	-46	16670	16695	26	AATGCCTGGAAGACCTCCTCCGACAG	0.947849	-52.3785	0.576923	1	1	1	1	1	1	5	1	1	0	9	1	A9	TGTCCTGCCAAGCCGGTTATGTTCT	10	1	A10	GTTACTTCGGGTCCATGACCCAGTC	TGTCCTGCCAAGCCGGTTATGTTCTTTACACTCGGACCTCGTCGACATGCATTAATGCCTGGAAGACCTCCTCCGACAGCCTCCTAAGTTTCGAGCTGGACTCAGTGGTTACTTCGGGTCCATGACCCAGTC	TGTCCTGCCAAGCCGGTTATGTTCTTTACACTCGGACCTCGTCGACATGCATTAATGCCTGGAAGACCTCCTCCGACAGCCTCCTAAGTTTCGAGCTGGACTCAGTGGTTACTTCGGGTCCATGACCCAGTCTCTTTGGGACCG
ENST00000378024	ENSG00000124942	AHNAK	set16	ENSG00000124942	AHNAK	-46	10675	10704	30	GCCAGACACACTGAATTTGGGCATTTTCAT	0.967849	-52.9785	0.433333	1	1	1	1	1	1	5	1	1	0	9	1	A9	TGTCCTGCCAAGCCGGTTATGTTCT	10	1	A10	GTTACTTCGGGTCCATGACCCAGTC	TGTCCTGCCAAGCCGGTTATGTTCTTTACACTCGGACCTCGTCGACATGCATTGCCAGACACACTGAATTTGGGCATTTTCATCCTCCTAAGTTTCGAGCTGGACTCAGTGGTTACTTCGGGTCCATGACCCAGTC	TGTCCTGCCAAGCCGGTTATGTTCTTTACACTCGGACCTCGTCGACATGCATTGCCAGACACACTGAATTTGGGCATTTTCATCCTCCTAAGTTTCGAGCTGGACTCAGTGGTTACTTCGGGTCCATGACCCAGTCGTTGCAGG
ENST00000378024	ENSG00000124942	AHNAK	set16	ENSG00000124942	AHNAK	-46	16189	16216	28	CCTTCATGCTGGGAACAGATGCATCCAG	0.932151	-53.7785	0.535714	1	1	1	1	1	1	5	1	1	0	9	1	A9	TGTCCTGCCAAGCCGGTTATGTTCT	10	1	A10	GTTACTTCGGGTCCATGACCCAGTC	TGTCCTGCCAAGCCGGTTATGTTCTTTACACTCGGACCTCGTCGACATGCATTCCTTCATGCTGGGAACAGATGCATCCAGCCTCCTAAGTTTCGAGCTGGACTCAGTGGTTACTTCGGGTCCATGACCCAGTC	TGTCCTGCCAAGCCGGTTATGTTCTTTACACTCGGACCTCGTCGACATGCATTCCTTCATGCTGGGAACAGATGCATCCAGCCTCCTAAGTTTCGAGCTGGACTCAGTGGTTACTTCGGGTCCATGACCCAGTCGTATAGCTTA
ENST00000378024	ENSG00000124942	AHNAK	set16	ENSG00000124942	AHNAK	-46	16129	16155	27	ATCAAGGTCAGGCCCAGAGACTTTTGG	0.877849	-51.6785	0.518519	1	1	1	1	1	1	5	1	1	0	9	1	A9	TGTCCTGCCAAGCCGGTTATGTTCT	10	1	A10	GTTACTTCGGGTCCATGACCCAGTC	TGTCCTGCCAAGCCGGTTATGTTCTTTACACTCGGACCTCGTCGACATGCATTATCAAGGTCAGGCCCAGAGACTTTTGGCCTCCTAAGTTTCGAGCTGGACTCAGTGGTTACTTCGGGTCCATGACCCAGTC	TGTCCTGCCAAGCCGGTTATGTTCTTTACACTCGGACCTCGTCGACATGCATTATCAAGGTCAGGCCCAGAGACTTTTGGCCTCCTAAGTTTCGAGCTGGACTCAGTGGTTACTTCGGGTCCATGACCCAGTCCTAAATGTCCT
ENST00000378024	ENSG00000124942	AHNAK	set16	ENSG00000124942	AHNAK	-46	16012	16038	27	TCCTTCAAGAGAGGGTAGCTGGGCATG	0.922151	-53.9785	0.555556	1	1	1	1	1	1	5	1	1	0	9	1	A9	TGTCCTGCCAAGCCGGTTATGTTCT	10	1	A10	GTTACTTCGGGTCCATGACCCAGTC	TGTCCTGCCAAGCCGGTTATGTTCTTTACACTCGGACCTCGTCGACATGCATTTCCTTCAAGAGAGGGTAGCTGGGCATGCCTCCTAAGTTTCGAGCTGGACTCAGTGGTTACTTCGGGTCCATGACCCAGTC	TGTCCTGCCAAGCCGGTTATGTTCTTTACACTCGGACCTCGTCGACATGCATTTCCTTCAAGAGAGGGTAGCTGGGCATGCCTCCTAAGTTTCGAGCTGGACTCAGTGGTTACTTCGGGTCCATGACCCAGTCAAGGGTTGCTC
ENST00000378024	ENSG00000124942	AHNAK	set16	ENSG00000124942	AHNAK	-46	15777	15807	31	GAAGGACGGTGTTTTGACTTTAGCATCTAGG	0.982151	-54.2785	0.451613	1	1	1	1	1	1	5	1	1	0	9	1	A9	TGTCCTGCCAAGCCGGTTATGTTCT	10	1	A10	GTTACTTCGGGTCCATGACCCAGTC	TGTCCTGCCAAGCCGGTTATGTTCTTTACACTCGGACCTCGTCGACATGCATTGAAGGACGGTGTTTTGACTTTAGCATCTAGGCCTCCTAAGTTTCGAGCTGGACTCAGTGGTTACTTCGGGTCCATGACCCAGTC	TGTCCTGCCAAGCCGGTTATGTTCTTTACACTCGGACCTCGTCGACATGCATTGAAGGACGGTGTTTTGACTTTAGCATCTAGGCCTCCTAAGTTTCGAGCTGGACTCAGTGGTTACTTCGGGTCCATGACCCAGTCCATACTC
ENST00000378024	ENSG00000124942	AHNAK	set16	ENSG00000124942	AHNAK	-46	15547	15575	29	CTAGGGAGAGGGGCCTCAGCTTTAAATTT	0.997849	-53.4785	0.482759	1	1	1	1	1	1	5	1	1	0	9	1	A9	TGTCCTGCCAAGCCGGTTATGTTCT	10	1	A10	GTTACTTCGGGTCCATGACCCAGTC	TGTCCTGCCAAGCCGGTTATGTTCTTTACACTCGGACCTCGTCGACATGCATTCTAGGGAGAGGGGCCTCAGCTTTAAATTTCCTCCTAAGTTTCGAGCTGGACTCAGTGGTTACTTCGGGTCCATGACCCAGTC	TGTCCTGCCAAGCCGGTTATGTTCTTTACACTCGGACCTCGTCGACATGCATTCTAGGGAGAGGGGCCTCAGCTTTAAATTTCCTCCTAAGTTTCGAGCTGGACTCAGTGGTTACTTCGGGTCCATGACCCAGTCTACGGACTA
ENST00000378024	ENSG00000124942	AHNAK	set16	ENSG00000124942	AHNAK	-46	15359	15389	31	CCAGGAACATTCAGGTCAAATCCCTGTTTTT	0.987849	-53.2785	0.419355	1	1	1	1	1	1	5	1	1	0	9	1	A9	TGTCCTGCCAAGCCGGTTATGTTCT	10	1	A10	GTTACTTCGGGTCCATGACCCAGTC	TGTCCTGCCAAGCCGGTTATGTTCTTTACACTCGGACCTCGTCGACATGCATTCCAGGAACATTCAGGTCAAATCCCTGTTTTTCCTCCTAAGTTTCGAGCTGGACTCAGTGGTTACTTCGGGTCCATGACCCAGTC	TGTCCTGCCAAGCCGGTTATGTTCTTTACACTCGGACCTCGTCGACATGCATTCCAGGAACATTCAGGTCAAATCCCTGTTTTTCCTCCTAAGTTTCGAGCTGGACTCAGTGGTTACTTCGGGTCCATGACCCAGTCAATTACC
ENST00000378024	ENSG00000124942	AHNAK	set16	ENSG00000124942	AHNAK	-46	15325	15357	33	GGCCTTAATCTTAGGACCACTCATATGAATTTT	0.967849	-53.9785	0.363636	1	1	1	1	1	1	5	1	1	0	9	1	A9	TGTCCTGCCAAGCCGGTTATGTTCT	10	1	A10	GTTACTTCGGGTCCATGACCCAGTC	TGTCCTGCCAAGCCGGTTATGTTCTTTACACTCGGACCTCGTCGACATGCATTGGCCTTAATCTTAGGACCACTCATATGAATTTTCCTCCTAAGTTTCGAGCTGGACTCAGTGGTTACTTCGGGTCCATGACCCAGTC	TGTCCTGCCAAGCCGGTTATGTTCTTTACACTCGGACCTCGTCGACATGCATTGGCCTTAATCTTAGGACCACTCATATGAATTTTCCTCCTAAGTTTCGAGCTGGACTCAGTGGTTACTTCGGGTCCATGACCCAGTCATGGC
ENST00000378024	ENSG00000124942	AHNAK	set16	ENSG00000124942	AHNAK	-46	15232	15258	27	CTCTGCCTCAGGAACAGTGACATCCAG	0.957849	-52.8785	0.555556	1	1	1	1	1	1	5	1	1	0	9	1	A9	TGTCCTGCCAAGCCGGTTATGTTCT	10	1	A10	GTTACTTCGGGTCCATGACCCAGTC	TGTCCTGCCAAGCCGGTTATGTTCTTTACACTCGGACCTCGTCGACATGCATTCTCTGCCTCAGGAACAGTGACATCCAGCCTCCTAAGTTTCGAGCTGGACTCAGTGGTTACTTCGGGTCCATGACCCAGTC	TGTCCTGCCAAGCCGGTTATGTTCTTTACACTCGGACCTCGTCGACATGCATTCTCTGCCTCAGGAACAGTGACATCCAGCCTCCTAAGTTTCGAGCTGGACTCAGTGGTTACTTCGGGTCCATGACCCAGTCCGGCGGCCCAG
ENST00000378024	ENSG00000124942	AHNAK	set16	ENSG00000124942	AHNAK	-46	15106	15137	32	TTAATATCTGGGCTGTCCATGTGTACATCTAA	0.992151	-54.1785	0.375	1	1	1	1	1	1	5	1	1	0	9	1	A9	TGTCCTGCCAAGCCGGTTATGTTCT	10	1	A10	GTTACTTCGGGTCCATGACCCAGTC	TGTCCTGCCAAGCCGGTTATGTTCTTTACACTCGGACCTCGTCGACATGCATTTTAATATCTGGGCTGTCCATGTGTACATCTAACCTCCTAAGTTTCGAGCTGGACTCAGTGGTTACTTCGGGTCCATGACCCAGTC	TGTCCTGCCAAGCCGGTTATGTTCTTTACACTCGGACCTCGTCGACATGCATTTTAATATCTGGGCTGTCCATGTGTACATCTAACCTCCTAAGTTTCGAGCTGGACTCAGTGGTTACTTCGGGTCCATGACCCAGTCGACGTA
ENST00000378024	ENSG00000124942	AHNAK	set16	ENSG00000124942	AHNAK	-46	17184	17213	30	ACTTTTCCAGATCCACTTTCCAAGTGACCT	0.997849	-53.6785	0.433333	1	1	1	1	1	1	5	1	1	0	9	1	A9	TGTCCTGCCAAGCCGGTTATGTTCT	10	1	A10	GTTACTTCGGGTCCATGACCCAGTC	TGTCCTGCCAAGCCGGTTATGTTCTTTACACTCGGACCTCGTCGACATGCATTACTTTTCCAGATCCACTTTCCAAGTGACCTCCTCCTAAGTTTCGAGCTGGACTCAGTGGTTACTTCGGGTCCATGACCCAGTC	TGTCCTGCCAAGCCGGTTATGTTCTTTACACTCGGACCTCGTCGACATGCATTACTTTTCCAGATCCACTTTCCAAGTGACCTCCTCCTAAGTTTCGAGCTGGACTCAGTGGTTACTTCGGGTCCATGACCCAGTCATCGCTTC
ENST00000378024	ENSG00000124942	AHNAK	set16	ENSG00000124942	AHNAK	-46	16785	16810	26	CAGGCCCAGAAATCTGCCCAGTTGGG	0.892151	-53.3785	0.615385	1	1	1	1	1	1	5	1	1	0	9	1	A9	TGTCCTGCCAAGCCGGTTATGTTCT	10	1	A10	GTTACTTCGGGTCCATGACCCAGTC	TGTCCTGCCAAGCCGGTTATGTTCTTTACACTCGGACCTCGTCGACATGCATTCAGGCCCAGAAATCTGCCCAGTTGGGCCTCCTAAGTTTCGAGCTGGACTCAGTGGTTACTTCGGGTCCATGACCCAGTC	TGTCCTGCCAAGCCGGTTATGTTCTTTACACTCGGACCTCGTCGACATGCATTCAGGCCCAGAAATCTGCCCAGTTGGGCCTCCTAAGTTTCGAGCTGGACTCAGTGGTTACTTCGGGTCCATGACCCAGTCACCGTCTGCTCA
ENST00000378024	ENSG00000124942	AHNAK	set16	ENSG00000124942	AHNAK	-46	14703	14733	31	GTCTGGACCTTCGATATTCACATCTGGAATA	0.987849	-54.0785	0.419355	1	1	1	1	1	1	5	1	1	0	9	1	A9	TGTCCTGCCAAGCCGGTTATGTTCT	10	1	A10	GTTACTTCGGGTCCATGACCCAGTC	TGTCCTGCCAAGCCGGTTATGTTCTTTACACTCGGACCTCGTCGACATGCATTGTCTGGACCTTCGATATTCACATCTGGAATACCTCCTAAGTTTCGAGCTGGACTCAGTGGTTACTTCGGGTCCATGACCCAGTC	TGTCCTGCCAAGCCGGTTATGTTCTTTACACTCGGACCTCGTCGACATGCATTGTCTGGACCTTCGATATTCACATCTGGAATACCTCCTAAGTTTCGAGCTGGACTCAGTGGTTACTTCGGGTCCATGACCCAGTCCTCCTCG
ENST00000378024	ENSG00000124942	AHNAK	set16	ENSG00000124942	AHNAK	-46	16413	16440	28	TTCGGATGCCTCCAAGCTTAGATCAGGA	0.972151	-53.8785	0.5	1	1	1	1	1	1	5	1	1	0	9	1	A9	TGTCCTGCCAAGCCGGTTATGTTCT	10	1	A10	GTTACTTCGGGTCCATGACCCAGTC	TGTCCTGCCAAGCCGGTTATGTTCTTTACACTCGGACCTCGTCGACATGCATTTTCGGATGCCTCCAAGCTTAGATCAGGACCTCCTAAGTTTCGAGCTGGACTCAGTGGTTACTTCGGGTCCATGACCCAGTC	TGTCCTGCCAAGCCGGTTATGTTCTTTACACTCGGACCTCGTCGACATGCATTTTCGGATGCCTCCAAGCTTAGATCAGGACCTCCTAAGTTTCGAGCTGGACTCAGTGGTTACTTCGGGTCCATGACCCAGTCACCAGCACGC
ENST00000378024	ENSG00000124942	AHNAK	set16	ENSG00000124942	AHNAK	-46	14075	14103	29	TTCCACTTTGGGCAGAGAAATGTCCATGT	0.967849	-52.8785	0.448276	1	1	1	1	1	1	5	1	1	0	9	1	A9	TGTCCTGCCAAGCCGGTTATGTTCT	10	1	A10	GTTACTTCGGGTCCATGACCCAGTC	TGTCCTGCCAAGCCGGTTATGTTCTTTACACTCGGACCTCGTCGACATGCATTTTCCACTTTGGGCAGAGAAATGTCCATGTCCTCCTAAGTTTCGAGCTGGACTCAGTGGTTACTTCGGGTCCATGACCCAGTC	TGTCCTGCCAAGCCGGTTATGTTCTTTACACTCGGACCTCGTCGACATGCATTTTCCACTTTGGGCAGAGAAATGTCCATGTCCTCCTAAGTTTCGAGCTGGACTCAGTGGTTACTTCGGGTCCATGACCCAGTCAGACAGGTG
ENST00000378024	ENSG00000124942	AHNAK	set16	ENSG00000124942	AHNAK	-46	14015	14043	29	GTCAACTTCAGGCATAGAGATCTTCGGTG	0.887849	-52.7785	0.482759	1	1	1	1	1	1	5	1	1	0	9	1	A9	TGTCCTGCCAAGCCGGTTATGTTCT	10	1	A10	GTTACTTCGGGTCCATGACCCAGTC	TGTCCTGCCAAGCCGGTTATGTTCTTTACACTCGGACCTCGTCGACATGCATTGTCAACTTCAGGCATAGAGATCTTCGGTGCCTCCTAAGTTTCGAGCTGGACTCAGTGGTTACTTCGGGTCCATGACCCAGTC	TGTCCTGCCAAGCCGGTTATGTTCTTTACACTCGGACCTCGTCGACATGCATTGTCAACTTCAGGCATAGAGATCTTCGGTGCCTCCTAAGTTTCGAGCTGGACTCAGTGGTTACTTCGGGTCCATGACCCAGTCGACTCGCTC
ENST00000378024	ENSG00000124942	AHNAK	set16	ENSG00000124942	AHNAK	-46	13981	14013	33	CTTGAGGTGTAAGTCAGGCATTTTAAATTTGGG	0.992151	-53.9785	0.393939	1	1	1	1	1	1	5	1	1	0	9	1	A9	TGTCCTGCCAAGCCGGTTATGTTCT	10	1	A10	GTTACTTCGGGTCCATGACCCAGTC	TGTCCTGCCAAGCCGGTTATGTTCTTTACACTCGGACCTCGTCGACATGCATTCTTGAGGTGTAAGTCAGGCATTTTAAATTTGGGCCTCCTAAGTTTCGAGCTGGACTCAGTGGTTACTTCGGGTCCATGACCCAGTC	TGTCCTGCCAAGCCGGTTATGTTCTTTACACTCGGACCTCGTCGACATGCATTCTTGAGGTGTAAGTCAGGCATTTTAAATTTGGGCCTCCTAAGTTTCGAGCTGGACTCAGTGGTTACTTCGGGTCCATGACCCAGTCGCGCT
ENST00000378024	ENSG00000124942	AHNAK	set16	ENSG00000124942	AHNAK	-46	7285	7315	31	TGTCAGCATCTAATTTGGGACCTTTGACATC	0.962151	-54.2785	0.419355	1	1	1	1	1	1	5	1	1	0	9	1	A9	TGTCCTGCCAAGCCGGTTATGTTCT	10	1	A10	GTTACTTCGGGTCCATGACCCAGTC	TGTCCTGCCAAGCCGGTTATGTTCTTTACACTCGGACCTCGTCGACATGCATTTGTCAGCATCTAATTTGGGACCTTTGACATCCCTCCTAAGTTTCGAGCTGGACTCAGTGGTTACTTCGGGTCCATGACCCAGTC	TGTCCTGCCAAGCCGGTTATGTTCTTTACACTCGGACCTCGTCGACATGCATTTGTCAGCATCTAATTTGGGACCTTTGACATCCCTCCTAAGTTTCGAGCTGGACTCAGTGGTTACTTCGGGTCCATGACCCAGTCTCTCTGG
ENST00000378024	ENSG00000124942	AHNAK	set16	ENSG00000124942	AHNAK	-46	7076	7103	28	ACATCTGGGACTTCAACATCCACCTTGG	0.977849	-52.6785	0.5	1	1	1	1	1	1	5	1	1	0	9	1	A9	TGTCCTGCCAAGCCGGTTATGTTCT	10	1	A10	GTTACTTCGGGTCCATGACCCAGTC	TGTCCTGCCAAGCCGGTTATGTTCTTTACACTCGGACCTCGTCGACATGCATTACATCTGGGACTTCAACATCCACCTTGGCCTCCTAAGTTTCGAGCTGGACTCAGTGGTTACTTCGGGTCCATGACCCAGTC	TGTCCTGCCAAGCCGGTTATGTTCTTTACACTCGGACCTCGTCGACATGCATTACATCTGGGACTTCAACATCCACCTTGGCCTCCTAAGTTTCGAGCTGGACTCAGTGGTTACTTCGGGTCCATGACCCAGTCTCAATTCTTC
ENST00000378024	ENSG00000124942	AHNAK	set16	ENSG00000124942	AHNAK	-46	7048	7074	27	TCCTGAGACATCAACGTCAGCCTTGGG	0.962151	-53.4785	0.555556	1	1	1	1	1	1	5	1	1	0	9	1	A9	TGTCCTGCCAAGCCGGTTATGTTCT	10	1	A10	GTTACTTCGGGTCCATGACCCAGTC	TGTCCTGCCAAGCCGGTTATGTTCTTTACACTCGGACCTCGTCGACATGCATTTCCTGAGACATCAACGTCAGCCTTGGGCCTCCTAAGTTTCGAGCTGGACTCAGTGGTTACTTCGGGTCCATGACCCAGTC	TGTCCTGCCAAGCCGGTTATGTTCTTTACACTCGGACCTCGTCGACATGCATTTCCTGAGACATCAACGTCAGCCTTGGGCCTCCTAAGTTTCGAGCTGGACTCAGTGGTTACTTCGGGTCCATGACCCAGTCGCACAGTGCTC
ENST00000378024	ENSG00000124942	AHNAK	set16	ENSG00000124942	AHNAK	-46	6932	6957	26	TGGGCCATGAACATCCACATCTGGGG	0.922151	-52.8785	0.576923	1	1	1	1	1	1	5	1	1	0	9	1	A9	TGTCCTGCCAAGCCGGTTATGTTCT	10	1	A10	GTTACTTCGGGTCCATGACCCAGTC	TGTCCTGCCAAGCCGGTTATGTTCTTTACACTCGGACCTCGTCGACATGCATTTGGGCCATGAACATCCACATCTGGGGCCTCCTAAGTTTCGAGCTGGACTCAGTGGTTACTTCGGGTCCATGACCCAGTC	TGTCCTGCCAAGCCGGTTATGTTCTTTACACTCGGACCTCGTCGACATGCATTTGGGCCATGAACATCCACATCTGGGGCCTCCTAAGTTTCGAGCTGGACTCAGTGGTTACTTCGGGTCCATGACCCAGTCACCTTCATTTGC
ENST00000378024	ENSG00000124942	AHNAK	set16	ENSG00000124942	AHNAK	-46	6871	6901	31	CAACATCTGGCACTTTCATTTCACCTTCTAC	0.897849	-52.8785	0.419355	1	1	1	1	1	1	5	1	1	0	9	1	A9	TGTCCTGCCAAGCCGGTTATGTTCT	10	1	A10	GTTACTTCGGGTCCATGACCCAGTC	TGTCCTGCCAAGCCGGTTATGTTCTTTACACTCGGACCTCGTCGACATGCATTCAACATCTGGCACTTTCATTTCACCTTCTACCCTCCTAAGTTTCGAGCTGGACTCAGTGGTTACTTCGGGTCCATGACCCAGTC	TGTCCTGCCAAGCCGGTTATGTTCTTTACACTCGGACCTCGTCGACATGCATTCAACATCTGGCACTTTCATTTCACCTTCTACCCTCCTAAGTTTCGAGCTGGACTCAGTGGTTACTTCGGGTCCATGACCCAGTCGAGACTT
ENST00000378024	ENSG00000124942	AHNAK	set16	ENSG00000124942	AHNAK	-46	6721	6749	29	TTCAACTTTGCATCAGGACACTCCAGCTC	0.942151	-54.3785	0.482759	1	1	1	1	1	1	5	1	1	0	9	1	A9	TGTCCTGCCAAGCCGGTTATGTTCT	10	1	A10	GTTACTTCGGGTCCATGACCCAGTC	TGTCCTGCCAAGCCGGTTATGTTCTTTACACTCGGACCTCGTCGACATGCATTTTCAACTTTGCATCAGGACACTCCAGCTCCCTCCTAAGTTTCGAGCTGGACTCAGTGGTTACTTCGGGTCCATGACCCAGTC	TGTCCTGCCAAGCCGGTTATGTTCTTTACACTCGGACCTCGTCGACATGCATTTTCAACTTTGCATCAGGACACTCCAGCTCCCTCCTAAGTTTCGAGCTGGACTCAGTGGTTACTTCGGGTCCATGACCCAGTCAGAGTATCC
ENST00000378024	ENSG00000124942	AHNAK	set16	ENSG00000124942	AHNAK	-46	6604	6631	28	GGCCTTTCAAGTGTAAGTCCACATCAGG	0.877849	-51.8785	0.5	1	1	1	1	1	1	5	1	1	0	9	1	A9	TGTCCTGCCAAGCCGGTTATGTTCT	10	1	A10	GTTACTTCGGGTCCATGACCCAGTC	TGTCCTGCCAAGCCGGTTATGTTCTTTACACTCGGACCTCGTCGACATGCATTGGCCTTTCAAGTGTAAGTCCACATCAGGCCTCCTAAGTTTCGAGCTGGACTCAGTGGTTACTTCGGGTCCATGACCCAGTC	TGTCCTGCCAAGCCGGTTATGTTCTTTACACTCGGACCTCGTCGACATGCATTGGCCTTTCAAGTGTAAGTCCACATCAGGCCTCCTAAGTTTCGAGCTGGACTCAGTGGTTACTTCGGGTCCATGACCCAGTCCTAAAACTTA
ENST00000378024	ENSG00000124942	AHNAK	set16	ENSG00000124942	AHNAK	-46	6492	6519	28	CACATCTGGGACTTCAACATCCACCTTG	0.867849	-51.5785	0.5	1	1	1	1	1	1	5	1	1	0	9	1	A9	TGTCCTGCCAAGCCGGTTATGTTCT	10	1	A10	GTTACTTCGGGTCCATGACCCAGTC	TGTCCTGCCAAGCCGGTTATGTTCTTTACACTCGGACCTCGTCGACATGCATTCACATCTGGGACTTCAACATCCACCTTGCCTCCTAAGTTTCGAGCTGGACTCAGTGGTTACTTCGGGTCCATGACCCAGTC	TGTCCTGCCAAGCCGGTTATGTTCTTTACACTCGGACCTCGTCGACATGCATTCACATCTGGGACTTCAACATCCACCTTGCCTCCTAAGTTTCGAGCTGGACTCAGTGGTTACTTCGGGTCCATGACCCAGTCGGACCCGTCT
ENST00000378024	ENSG00000124942	AHNAK	set16	ENSG00000124942	AHNAK	-46	6349	6374	26	TCTGGGCCATGAACATCCACATCTGG	0.867849	-51.0785	0.538462	1	1	1	1	1	1	5	1	1	0	9	1	A9	TGTCCTGCCAAGCCGGTTATGTTCT	10	1	A10	GTTACTTCGGGTCCATGACCCAGTC	TGTCCTGCCAAGCCGGTTATGTTCTTTACACTCGGACCTCGTCGACATGCATTTCTGGGCCATGAACATCCACATCTGGCCTCCTAAGTTTCGAGCTGGACTCAGTGGTTACTTCGGGTCCATGACCCAGTC	TGTCCTGCCAAGCCGGTTATGTTCTTTACACTCGGACCTCGTCGACATGCATTTCTGGGCCATGAACATCCACATCTGGCCTCCTAAGTTTCGAGCTGGACTCAGTGGTTACTTCGGGTCCATGACCCAGTCGTAGTACATCGT
ENST00000378024	ENSG00000124942	AHNAK	set16	ENSG00000124942	AHNAK	-46	6285	6315	31	AACATCTGGCACTTTCATTTCACCTTCTACC	0.992151	-53.9785	0.419355	1	1	1	1	1	1	5	1	1	0	9	1	A9	TGTCCTGCCAAGCCGGTTATGTTCT	10	1	A10	GTTACTTCGGGTCCATGACCCAGTC	TGTCCTGCCAAGCCGGTTATGTTCTTTACACTCGGACCTCGTCGACATGCATTAACATCTGGCACTTTCATTTCACCTTCTACCCCTCCTAAGTTTCGAGCTGGACTCAGTGGTTACTTCGGGTCCATGACCCAGTC	TGTCCTGCCAAGCCGGTTATGTTCTTTACACTCGGACCTCGTCGACATGCATTAACATCTGGCACTTTCATTTCACCTTCTACCCCTCCTAAGTTTCGAGCTGGACTCAGTGGTTACTTCGGGTCCATGACCCAGTCAGTTAAG
ENST00000378024	ENSG00000124942	AHNAK	set16	ENSG00000124942	AHNAK	-46	6202	6227	26	ACATCAGGCATGGAGATCTTGGGGGT	0.957849	-52.0785	0.538462	1	1	1	1	1	1	5	1	1	0	9	1	A9	TGTCCTGCCAAGCCGGTTATGTTCT	10	1	A10	GTTACTTCGGGTCCATGACCCAGTC	TGTCCTGCCAAGCCGGTTATGTTCTTTACACTCGGACCTCGTCGACATGCATTACATCAGGCATGGAGATCTTGGGGGTCCTCCTAAGTTTCGAGCTGGACTCAGTGGTTACTTCGGGTCCATGACCCAGTC	TGTCCTGCCAAGCCGGTTATGTTCTTTACACTCGGACCTCGTCGACATGCATTACATCAGGCATGGAGATCTTGGGGGTCCTCCTAAGTTTCGAGCTGGACTCAGTGGTTACTTCGGGTCCATGACCCAGTCGTGACCCCGCGT
ENST00000378024	ENSG00000124942	AHNAK	set16	ENSG00000124942	AHNAK	-46	12330	12358	29	TGATGTCAACTTCAGGGGCCTTTAGATCA	0.967849	-53.1785	0.448276	1	1	1	1	1	1	5	1	1	0	9	1	A9	TGTCCTGCCAAGCCGGTTATGTTCT	10	1	A10	GTTACTTCGGGTCCATGACCCAGTC	TGTCCTGCCAAGCCGGTTATGTTCTTTACACTCGGACCTCGTCGACATGCATTTGATGTCAACTTCAGGGGCCTTTAGATCACCTCCTAAGTTTCGAGCTGGACTCAGTGGTTACTTCGGGTCCATGACCCAGTC	TGTCCTGCCAAGCCGGTTATGTTCTTTACACTCGGACCTCGTCGACATGCATTTGATGTCAACTTCAGGGGCCTTTAGATCACCTCCTAAGTTTCGAGCTGGACTCAGTGGTTACTTCGGGTCCATGACCCAGTCGCCTTCTCA
ENST00000378024	ENSG00000124942	AHNAK	set16	ENSG00000124942	AHNAK	-46	12144	12173	30	TTCACATCTGGAACATCAACGTCCACCTTG	0.922151	-54.2785	0.466667	1	1	1	1	1	1	5	1	1	0	9	1	A9	TGTCCTGCCAAGCCGGTTATGTTCT	10	1	A10	GTTACTTCGGGTCCATGACCCAGTC	TGTCCTGCCAAGCCGGTTATGTTCTTTACACTCGGACCTCGTCGACATGCATTTTCACATCTGGAACATCAACGTCCACCTTGCCTCCTAAGTTTCGAGCTGGACTCAGTGGTTACTTCGGGTCCATGACCCAGTC	TGTCCTGCCAAGCCGGTTATGTTCTTTACACTCGGACCTCGTCGACATGCATTTTCACATCTGGAACATCAACGTCCACCTTGCCTCCTAAGTTTCGAGCTGGACTCAGTGGTTACTTCGGGTCCATGACCCAGTCCATGTACA
ENST00000378024	ENSG00000124942	AHNAK	set16	ENSG00000124942	AHNAK	-46	11869	11899	31	GTCCTTTCAGGTTAAGATCAATGTCAGGCAT	0.982151	-54.1785	0.419355	1	1	1	1	1	1	5	1	1	0	9	1	A9	TGTCCTGCCAAGCCGGTTATGTTCT	10	1	A10	GTTACTTCGGGTCCATGACCCAGTC	TGTCCTGCCAAGCCGGTTATGTTCTTTACACTCGGACCTCGTCGACATGCATTGTCCTTTCAGGTTAAGATCAATGTCAGGCATCCTCCTAAGTTTCGAGCTGGACTCAGTGGTTACTTCGGGTCCATGACCCAGTC	TGTCCTGCCAAGCCGGTTATGTTCTTTACACTCGGACCTCGTCGACATGCATTGTCCTTTCAGGTTAAGATCAATGTCAGGCATCCTCCTAAGTTTCGAGCTGGACTCAGTGGTTACTTCGGGTCCATGACCCAGTCCAAAGCG
ENST00000378024	ENSG00000124942	AHNAK	set16	ENSG00000124942	AHNAK	-46	11749	11775	27	ATCAATGTCCACCTTGGGTCCTGAGAC	0.937849	-52.2785	0.518519	1	1	1	1	1	1	5	1	1	0	9	1	A9	TGTCCTGCCAAGCCGGTTATGTTCT	10	1	A10	GTTACTTCGGGTCCATGACCCAGTC	TGTCCTGCCAAGCCGGTTATGTTCTTTACACTCGGACCTCGTCGACATGCATTATCAATGTCCACCTTGGGTCCTGAGACCCTCCTAAGTTTCGAGCTGGACTCAGTGGTTACTTCGGGTCCATGACCCAGTC	TGTCCTGCCAAGCCGGTTATGTTCTTTACACTCGGACCTCGTCGACATGCATTATCAATGTCCACCTTGGGTCCTGAGACCCTCCTAAGTTTCGAGCTGGACTCAGTGGTTACTTCGGGTCCATGACCCAGTCCCTTTAAAGAG
ENST00000378024	ENSG00000124942	AHNAK	set16	ENSG00000124942	AHNAK	-46	11250	11276	27	TCAAAGTCAGGCATGGAGATCTTGGGG	0.907849	-51.9785	0.518519	1	1	1	1	1	1	5	1	1	0	9	1	A9	TGTCCTGCCAAGCCGGTTATGTTCT	10	1	A10	GTTACTTCGGGTCCATGACCCAGTC	TGTCCTGCCAAGCCGGTTATGTTCTTTACACTCGGACCTCGTCGACATGCATTTCAAAGTCAGGCATGGAGATCTTGGGGCCTCCTAAGTTTCGAGCTGGACTCAGTGGTTACTTCGGGTCCATGACCCAGTC	TGTCCTGCCAAGCCGGTTATGTTCTTTACACTCGGACCTCGTCGACATGCATTTCAAAGTCAGGCATGGAGATCTTGGGGCCTCCTAAGTTTCGAGCTGGACTCAGTGGTTACTTCGGGTCCATGACCCAGTCTGCCACAGCGA
ENST00000378024	ENSG00000124942	AHNAK	set16	ENSG00000124942	AHNAK	-46	11098	11124	27	GAGGGTAACATCGACTTCAGGGCCTTC	0.977849	-52.9785	0.555556	1	1	1	1	1	1	5	1	1	0	9	1	A9	TGTCCTGCCAAGCCGGTTATGTTCT	10	1	A10	GTTACTTCGGGTCCATGACCCAGTC	TGTCCTGCCAAGCCGGTTATGTTCTTTACACTCGGACCTCGTCGACATGCATTGAGGGTAACATCGACTTCAGGGCCTTCCCTCCTAAGTTTCGAGCTGGACTCAGTGGTTACTTCGGGTCCATGACCCAGTC	TGTCCTGCCAAGCCGGTTATGTTCTTTACACTCGGACCTCGTCGACATGCATTGAGGGTAACATCGACTTCAGGGCCTTCCCTCCTAAGTTTCGAGCTGGACTCAGTGGTTACTTCGGGTCCATGACCCAGTCTCTCCAGATTT
ENST00000378024	ENSG00000124942	AHNAK	set16	ENSG00000124942	AHNAK	-46	11010	11036	27	TCTGGACCATGAACATCCACATCTGGG	0.937849	-52.0785	0.518519	1	1	1	1	1	1	5	1	1	0	9	1	A9	TGTCCTGCCAAGCCGGTTATGTTCT	10	1	A10	GTTACTTCGGGTCCATGACCCAGTC	TGTCCTGCCAAGCCGGTTATGTTCTTTACACTCGGACCTCGTCGACATGCATTTCTGGACCATGAACATCCACATCTGGGCCTCCTAAGTTTCGAGCTGGACTCAGTGGTTACTTCGGGTCCATGACCCAGTC	TGTCCTGCCAAGCCGGTTATGTTCTTTACACTCGGACCTCGTCGACATGCATTTCTGGACCATGAACATCCACATCTGGGCCTCCTAAGTTTCGAGCTGGACTCAGTGGTTACTTCGGGTCCATGACCCAGTCGACCTGAGGCT
ENST00000378024	ENSG00000124942	AHNAK	set16	ENSG00000124942	AHNAK	-46	10886	10916	31	ACCTTGGGGCCTTTCAAGTTTAAGTCAATGT	0.922151	-54.2785	0.419355	1	1	1	1	1	1	5	1	1	0	9	1	A9	TGTCCTGCCAAGCCGGTTATGTTCT	10	1	A10	GTTACTTCGGGTCCATGACCCAGTC	TGTCCTGCCAAGCCGGTTATGTTCTTTACACTCGGACCTCGTCGACATGCATTACCTTGGGGCCTTTCAAGTTTAAGTCAATGTCCTCCTAAGTTTCGAGCTGGACTCAGTGGTTACTTCGGGTCCATGACCCAGTC	TGTCCTGCCAAGCCGGTTATGTTCTTTACACTCGGACCTCGTCGACATGCATTACCTTGGGGCCTTTCAAGTTTAAGTCAATGTCCTCCTAAGTTTCGAGCTGGACTCAGTGGTTACTTCGGGTCCATGACCCAGTCAATACCG
ENST00000378024	ENSG00000124942	AHNAK	set16	ENSG00000124942	AHNAK	-46	8890	8918	29	TGCCAGTCTGGACCCTGAACATTAACATC	0.912151	-54.2785	0.482759	1	1	1	1	1	1	5	1	1	0	9	1	A9	TGTCCTGCCAAGCCGGTTATGTTCT	10	1	A10	GTTACTTCGGGTCCATGACCCAGTC	TGTCCTGCCAAGCCGGTTATGTTCTTTACACTCGGACCTCGTCGACATGCATTTGCCAGTCTGGACCCTGAACATTAACATCCCTCCTAAGTTTCGAGCTGGACTCAGTGGTTACTTCGGGTCCATGACCCAGTC	TGTCCTGCCAAGCCGGTTATGTTCTTTACACTCGGACCTCGTCGACATGCATTTGCCAGTCTGGACCCTGAACATTAACATCCCTCCTAAGTTTCGAGCTGGACTCAGTGGTTACTTCGGGTCCATGACCCAGTCGCCCCTGCG
ENST00000378024	ENSG00000124942	AHNAK	set16	ENSG00000124942	AHNAK	-46	10382	10415	34	GGAGCATTAATATCAACTTTTGGACCTGTTATGT	0.952151	-54.8785	0.352941	1	1	1	1	1	1	5	1	1	0	9	1	A9	TGTCCTGCCAAGCCGGTTATGTTCT	10	1	A10	GTTACTTCGGGTCCATGACCCAGTC	TGTCCTGCCAAGCCGGTTATGTTCTTTACACTCGGACCTCGTCGACATGCATTGGAGCATTAATATCAACTTTTGGACCTGTTATGTCCTCCTAAGTTTCGAGCTGGACTCAGTGGTTACTTCGGGTCCATGACCCAGTC	TGTCCTGCCAAGCCGGTTATGTTCTTTACACTCGGACCTCGTCGACATGCATTGGAGCATTAATATCAACTTTTGGACCTGTTATGTCCTCCTAAGTTTCGAGCTGGACTCAGTGGTTACTTCGGGTCCATGACCCAGTCTATT
ENST00000378024	ENSG00000124942	AHNAK	set16	ENSG00000124942	AHNAK	-46	10156	10185	30	GACATCAACATCTCCCTTAAGCTTTGAGCC	0.952151	-54.4785	0.466667	1	1	1	1	1	1	5	1	1	0	9	1	A9	TGTCCTGCCAAGCCGGTTATGTTCT	10	1	A10	GTTACTTCGGGTCCATGACCCAGTC	TGTCCTGCCAAGCCGGTTATGTTCTTTACACTCGGACCTCGTCGACATGCATTGACATCAACATCTCCCTTAAGCTTTGAGCCCCTCCTAAGTTTCGAGCTGGACTCAGTGGTTACTTCGGGTCCATGACCCAGTC	TGTCCTGCCAAGCCGGTTATGTTCTTTACACTCGGACCTCGTCGACATGCATTGACATCAACATCTCCCTTAAGCTTTGAGCCCCTCCTAAGTTTCGAGCTGGACTCAGTGGTTACTTCGGGTCCATGACCCAGTCAAAACTAT
ENST00000378024	ENSG00000124942	AHNAK	set16	ENSG00000124942	AHNAK	-46	9798	9827	30	TTCACATCTGGAACATCAACGTCCACCTTG	0.922151	-54.2785	0.466667	1	1	1	1	1	1	5	1	1	0	9	1	A9	TGTCCTGCCAAGCCGGTTATGTTCT	10	1	A10	GTTACTTCGGGTCCATGACCCAGTC	TGTCCTGCCAAGCCGGTTATGTTCTTTACACTCGGACCTCGTCGACATGCATTTTCACATCTGGAACATCAACGTCCACCTTGCCTCCTAAGTTTCGAGCTGGACTCAGTGGTTACTTCGGGTCCATGACCCAGTC	TGTCCTGCCAAGCCGGTTATGTTCTTTACACTCGGACCTCGTCGACATGCATTTTCACATCTGGAACATCAACGTCCACCTTGCCTCCTAAGTTTCGAGCTGGACTCAGTGGTTACTTCGGGTCCATGACCCAGTCTACAGCAT
ENST00000378024	ENSG00000124942	AHNAK	set16	ENSG00000124942	AHNAK	-46	9619	9651	33	ATTAATATCCACTTTGGGGCCTTTAATATCCAC	0.997849	-53.7785	0.363636	1	1	1	1	1	1	5	1	1	0	9	1	A9	TGTCCTGCCAAGCCGGTTATGTTCT	10	1	A10	GTTACTTCGGGTCCATGACCCAGTC	TGTCCTGCCAAGCCGGTTATGTTCTTTACACTCGGACCTCGTCGACATGCATTATTAATATCCACTTTGGGGCCTTTAATATCCACCCTCCTAAGTTTCGAGCTGGACTCAGTGGTTACTTCGGGTCCATGACCCAGTC	TGTCCTGCCAAGCCGGTTATGTTCTTTACACTCGGACCTCGTCGACATGCATTATTAATATCCACTTTGGGGCCTTTAATATCCACCCTCCTAAGTTTCGAGCTGGACTCAGTGGTTACTTCGGGTCCATGACCCAGTCTCCGT
ENST00000378024	ENSG00000124942	AHNAK	set16	ENSG00000124942	AHNAK	-46	9527	9556	30	TGGGACCTTTCAGGTTAAGATCAATGTCAG	0.917849	-52.7785	0.433333	1	1	1	1	1	1	5	1	1	0	9	1	A9	TGTCCTGCCAAGCCGGTTATGTTCT	10	1	A10	GTTACTTCGGGTCCATGACCCAGTC	TGTCCTGCCAAGCCGGTTATGTTCTTTACACTCGGACCTCGTCGACATGCATTTGGGACCTTTCAGGTTAAGATCAATGTCAGCCTCCTAAGTTTCGAGCTGGACTCAGTGGTTACTTCGGGTCCATGACCCAGTC	TGTCCTGCCAAGCCGGTTATGTTCTTTACACTCGGACCTCGTCGACATGCATTTGGGACCTTTCAGGTTAAGATCAATGTCAGCCTCCTAAGTTTCGAGCTGGACTCAGTGGTTACTTCGGGTCCATGACCCAGTCGGATGGCG
ENST00000378024	ENSG00000124942	AHNAK	set16	ENSG00000124942	AHNAK	-46	9406	9433	28	GAACATCAATGTCCACCTTGGGTCCTGA	0.972151	-53.2785	0.5	1	1	1	1	1	1	5	1	1	0	9	1	A9	TGTCCTGCCAAGCCGGTTATGTTCT	10	1	A10	GTTACTTCGGGTCCATGACCCAGTC	TGTCCTGCCAAGCCGGTTATGTTCTTTACACTCGGACCTCGTCGACATGCATTGAACATCAATGTCCACCTTGGGTCCTGACCTCCTAAGTTTCGAGCTGGACTCAGTGGTTACTTCGGGTCCATGACCCAGTC	TGTCCTGCCAAGCCGGTTATGTTCTTTACACTCGGACCTCGTCGACATGCATTGAACATCAATGTCCACCTTGGGTCCTGACCTCCTAAGTTTCGAGCTGGACTCAGTGGTTACTTCGGGTCCATGACCCAGTCGGATGCAATG
ENST00000378024	ENSG00000124942	AHNAK	set16	ENSG00000124942	AHNAK	-46	9379	9404	26	ACATCAAGGTCAGCCTTGGGCAGGTT	0.927849	-51.7785	0.538462	1	1	1	1	1	1	5	1	1	0	9	1	A9	TGTCCTGCCAAGCCGGTTATGTTCT	10	1	A10	GTTACTTCGGGTCCATGACCCAGTC	TGTCCTGCCAAGCCGGTTATGTTCTTTACACTCGGACCTCGTCGACATGCATTACATCAAGGTCAGCCTTGGGCAGGTTCCTCCTAAGTTTCGAGCTGGACTCAGTGGTTACTTCGGGTCCATGACCCAGTC	TGTCCTGCCAAGCCGGTTATGTTCTTTACACTCGGACCTCGTCGACATGCATTACATCAAGGTCAGCCTTGGGCAGGTTCCTCCTAAGTTTCGAGCTGGACTCAGTGGTTACTTCGGGTCCATGACCCAGTCTGGGAGGTTCAT
ENST00000378024	ENSG00000124942	AHNAK	set16	ENSG00000124942	AHNAK	-46	9322	9350	29	AAGCCAGGCATGCTGAATTTGGGCATTTT	0.967849	-52.5785	0.448276	1	1	1	1	1	1	5	1	1	0	9	1	A9	TGTCCTGCCAAGCCGGTTATGTTCT	10	1	A10	GTTACTTCGGGTCCATGACCCAGTC	TGTCCTGCCAAGCCGGTTATGTTCTTTACACTCGGACCTCGTCGACATGCATTAAGCCAGGCATGCTGAATTTGGGCATTTTCCTCCTAAGTTTCGAGCTGGACTCAGTGGTTACTTCGGGTCCATGACCCAGTC	TGTCCTGCCAAGCCGGTTATGTTCTTTACACTCGGACCTCGTCGACATGCATTAAGCCAGGCATGCTGAATTTGGGCATTTTCCTCCTAAGTTTCGAGCTGGACTCAGTGGTTACTTCGGGTCCATGACCCAGTCCGACAATCG
ENST00000378024	ENSG00000124942	AHNAK	set16	ENSG00000124942	AHNAK	-46	9265	9290	26	CCTTGAACGCCCACATCCGGGACATC	0.942151	-52.9785	0.615385	1	1	1	1	1	1	5	1	1	0	9	1	A9	TGTCCTGCCAAGCCGGTTATGTTCT	10	1	A10	GTTACTTCGGGTCCATGACCCAGTC	TGTCCTGCCAAGCCGGTTATGTTCTTTACACTCGGACCTCGTCGACATGCATTCCTTGAACGCCCACATCCGGGACATCCCTCCTAAGTTTCGAGCTGGACTCAGTGGTTACTTCGGGTCCATGACCCAGTC	TGTCCTGCCAAGCCGGTTATGTTCTTTACACTCGGACCTCGTCGACATGCATTCCTTGAACGCCCACATCCGGGACATCCCTCCTAAGTTTCGAGCTGGACTCAGTGGTTACTTCGGGTCCATGACCCAGTCAGCCAGTGGACG
ENST00000378024	ENSG00000124942	AHNAK	set16	ENSG00000124942	AHNAK	-46	9150	9179	30	TTCACCTTGGGACCTTTCAGATGCAAATCA	0.952151	-53.9785	0.433333	1	1	1	1	1	1	5	1	1	0	9	1	A9	TGTCCTGCCAAGCCGGTTATGTTCT	10	1	A10	GTTACTTCGGGTCCATGACCCAGTC	TGTCCTGCCAAGCCGGTTATGTTCTTTACACTCGGACCTCGTCGACATGCATTTTCACCTTGGGACCTTTCAGATGCAAATCACCTCCTAAGTTTCGAGCTGGACTCAGTGGTTACTTCGGGTCCATGACCCAGTC	TGTCCTGCCAAGCCGGTTATGTTCTTTACACTCGGACCTCGTCGACATGCATTTTCACCTTGGGACCTTTCAGATGCAAATCACCTCCTAAGTTTCGAGCTGGACTCAGTGGTTACTTCGGGTCCATGACCCAGTCTCGGAGTA
ENST00000378024	ENSG00000124942	AHNAK	set16	ENSG00000124942	AHNAK	-46	9032	9060	29	GTTAACATCAGGGCCTTCAACGTCCACTT	0.992151	-53.3785	0.482759	1	1	1	1	1	1	5	1	1	0	9	1	A9	TGTCCTGCCAAGCCGGTTATGTTCT	10	1	A10	GTTACTTCGGGTCCATGACCCAGTC	TGTCCTGCCAAGCCGGTTATGTTCTTTACACTCGGACCTCGTCGACATGCATTGTTAACATCAGGGCCTTCAACGTCCACTTCCTCCTAAGTTTCGAGCTGGACTCAGTGGTTACTTCGGGTCCATGACCCAGTC	TGTCCTGCCAAGCCGGTTATGTTCTTTACACTCGGACCTCGTCGACATGCATTGTTAACATCAGGGCCTTCAACGTCCACTTCCTCCTAAGTTTCGAGCTGGACTCAGTGGTTACTTCGGGTCCATGACCCAGTCTCACCAGAT
ENST00000378024	ENSG00000124942	AHNAK	set16	ENSG00000124942	AHNAK	-46	9006	9030	25	GGGGCCTGAGACATCAACGTCAGCC	0.952151	-53.0785	0.64	1	1	1	1	1	1	5	1	1	0	9	1	A9	TGTCCTGCCAAGCCGGTTATGTTCT	10	1	A10	GTTACTTCGGGTCCATGACCCAGTC	TGTCCTGCCAAGCCGGTTATGTTCTTTACACTCGGACCTCGTCGACATGCATTGGGGCCTGAGACATCAACGTCAGCCCCTCCTAAGTTTCGAGCTGGACTCAGTGGTTACTTCGGGTCCATGACCCAGTC	TGTCCTGCCAAGCCGGTTATGTTCTTTACACTCGGACCTCGTCGACATGCATTGGGGCCTGAGACATCAACGTCAGCCCCTCCTAAGTTTCGAGCTGGACTCAGTGGTTACTTCGGGTCCATGACCCAGTCAATAACCACGAGA
ENST00000378024	ENSG00000124942	AHNAK	set16	ENSG00000124942	AHNAK	-46	13453	13480	28	CTTCCACTTTGGGCAGAGAGACATCCAC	0.932151	-54.0785	0.535714	1	1	1	1	1	1	5	1	1	0	9	1	A9	TGTCCTGCCAAGCCGGTTATGTTCT	10	1	A10	GTTACTTCGGGTCCATGACCCAGTC	TGTCCTGCCAAGCCGGTTATGTTCTTTACACTCGGACCTCGTCGACATGCATTCTTCCACTTTGGGCAGAGAGACATCCACCCTCCTAAGTTTCGAGCTGGACTCAGTGGTTACTTCGGGTCCATGACCCAGTC	TGTCCTGCCAAGCCGGTTATGTTCTTTACACTCGGACCTCGTCGACATGCATTCTTCCACTTTGGGCAGAGAGACATCCACCCTCCTAAGTTTCGAGCTGGACTCAGTGGTTACTTCGGGTCCATGACCCAGTCATTAGGCGAG
ENST00000378024	ENSG00000124942	AHNAK	set16	ENSG00000124942	AHNAK	-46	8832	8861	30	TTGAGGTCAACTTCAGGACCTTTCAGATCT	0.997849	-54.0785	0.433333	1	1	1	1	1	1	5	1	1	0	9	1	A9	TGTCCTGCCAAGCCGGTTATGTTCT	10	1	A10	GTTACTTCGGGTCCATGACCCAGTC	TGTCCTGCCAAGCCGGTTATGTTCTTTACACTCGGACCTCGTCGACATGCATTTTGAGGTCAACTTCAGGACCTTTCAGATCTCCTCCTAAGTTTCGAGCTGGACTCAGTGGTTACTTCGGGTCCATGACCCAGTC	TGTCCTGCCAAGCCGGTTATGTTCTTTACACTCGGACCTCGTCGACATGCATTTTGAGGTCAACTTCAGGACCTTTCAGATCTCCTCCTAAGTTTCGAGCTGGACTCAGTGGTTACTTCGGGTCCATGACCCAGTCAGGGCCCC
ENST00000378024	ENSG00000124942	AHNAK	set16	ENSG00000124942	AHNAK	-46	8612	8638	27	AGACATCAATGTCAGCCTTGGGCAGGT	0.992151	-52.9785	0.518519	1	1	1	1	1	1	5	1	1	0	9	1	A9	TGTCCTGCCAAGCCGGTTATGTTCT	10	1	A10	GTTACTTCGGGTCCATGACCCAGTC	TGTCCTGCCAAGCCGGTTATGTTCTTTACACTCGGACCTCGTCGACATGCATTAGACATCAATGTCAGCCTTGGGCAGGTCCTCCTAAGTTTCGAGCTGGACTCAGTGGTTACTTCGGGTCCATGACCCAGTC	TGTCCTGCCAAGCCGGTTATGTTCTTTACACTCGGACCTCGTCGACATGCATTAGACATCAATGTCAGCCTTGGGCAGGTCCTCCTAAGTTTCGAGCTGGACTCAGTGGTTACTTCGGGTCCATGACCCAGTCCGTGAAAAAGC
ENST00000378024	ENSG00000124942	AHNAK	set16	ENSG00000124942	AHNAK	-46	8286	8316	31	CAACTTTCCCTCTGGTCCTTCAATGTTAACA	0.977849	-53.4785	0.419355	1	1	1	1	1	1	5	1	1	0	9	1	A9	TGTCCTGCCAAGCCGGTTATGTTCT	10	1	A10	GTTACTTCGGGTCCATGACCCAGTC	TGTCCTGCCAAGCCGGTTATGTTCTTTACACTCGGACCTCGTCGACATGCATTCAACTTTCCCTCTGGTCCTTCAATGTTAACACCTCCTAAGTTTCGAGCTGGACTCAGTGGTTACTTCGGGTCCATGACCCAGTC	TGTCCTGCCAAGCCGGTTATGTTCTTTACACTCGGACCTCGTCGACATGCATTCAACTTTCCCTCTGGTCCTTCAATGTTAACACCTCCTAAGTTTCGAGCTGGACTCAGTGGTTACTTCGGGTCCATGACCCAGTCTGCAGTT
ENST00000378024	ENSG00000124942	AHNAK	set16	ENSG00000124942	AHNAK	-46	14275	14301	27	TCCTGAGACATCAATGTCAGCCTTGGG	0.907849	-52.0785	0.518519	1	1	1	1	1	1	5	1	1	0	9	1	A9	TGTCCTGCCAAGCCGGTTATGTTCT	10	1	A10	GTTACTTCGGGTCCATGACCCAGTC	TGTCCTGCCAAGCCGGTTATGTTCTTTACACTCGGACCTCGTCGACATGCATTTCCTGAGACATCAATGTCAGCCTTGGGCCTCCTAAGTTTCGAGCTGGACTCAGTGGTTACTTCGGGTCCATGACCCAGTC	TGTCCTGCCAAGCCGGTTATGTTCTTTACACTCGGACCTCGTCGACATGCATTTCCTGAGACATCAATGTCAGCCTTGGGCCTCCTAAGTTTCGAGCTGGACTCAGTGGTTACTTCGGGTCCATGACCCAGTCGGAATCGGGTC
ENST00000378024	ENSG00000124942	AHNAK	set16	ENSG00000124942	AHNAK	-46	7553	7582	30	TATCAGGCATCTTGAACTTAGGGCCTTTCA	0.972151	-54.0785	0.433333	1	1	1	1	1	1	5	1	1	0	9	1	A9	TGTCCTGCCAAGCCGGTTATGTTCT	10	1	A10	GTTACTTCGGGTCCATGACCCAGTC	TGTCCTGCCAAGCCGGTTATGTTCTTTACACTCGGACCTCGTCGACATGCATTTATCAGGCATCTTGAACTTAGGGCCTTTCACCTCCTAAGTTTCGAGCTGGACTCAGTGGTTACTTCGGGTCCATGACCCAGTC	TGTCCTGCCAAGCCGGTTATGTTCTTTACACTCGGACCTCGTCGACATGCATTTATCAGGCATCTTGAACTTAGGGCCTTTCACCTCCTAAGTTTCGAGCTGGACTCAGTGGTTACTTCGGGTCCATGACCCAGTCATGACTAT
ENST00000378024	ENSG00000124942	AHNAK	set16	ENSG00000124942	AHNAK	-46	7376	7408	33	TAGAGATTTTGGGAGCTTTAAAGTGCATATCTG	0.917849	-53.7785	0.363636	1	1	1	1	1	1	5	1	1	0	9	1	A9	TGTCCTGCCAAGCCGGTTATGTTCT	10	1	A10	GTTACTTCGGGTCCATGACCCAGTC	TGTCCTGCCAAGCCGGTTATGTTCTTTACACTCGGACCTCGTCGACATGCATTTAGAGATTTTGGGAGCTTTAAAGTGCATATCTGCCTCCTAAGTTTCGAGCTGGACTCAGTGGTTACTTCGGGTCCATGACCCAGTC	TGTCCTGCCAAGCCGGTTATGTTCTTTACACTCGGACCTCGTCGACATGCATTTAGAGATTTTGGGAGCTTTAAAGTGCATATCTGCCTCCTAAGTTTCGAGCTGGACTCAGTGGTTACTTCGGGTCCATGACCCAGTCCCTGA
ENST00000378024	ENSG00000124942	AHNAK	set16	ENSG00000124942	AHNAK	-46	7344	7374	31	CATCTTGAACTTAGGAGTTTTCCACTTGCCA	0.967849	-53.5785	0.419355	1	1	1	1	1	1	5	1	1	0	9	1	A9	TGTCCTGCCAAGCCGGTTATGTTCT	10	1	A10	GTTACTTCGGGTCCATGACCCAGTC	TGTCCTGCCAAGCCGGTTATGTTCTTTACACTCGGACCTCGTCGACATGCATTCATCTTGAACTTAGGAGTTTTCCACTTGCCACCTCCTAAGTTTCGAGCTGGACTCAGTGGTTACTTCGGGTCCATGACCCAGTC	TGTCCTGCCAAGCCGGTTATGTTCTTTACACTCGGACCTCGTCGACATGCATTCATCTTGAACTTAGGAGTTTTCCACTTGCCACCTCCTAAGTTTCGAGCTGGACTCAGTGGTTACTTCGGGTCCATGACCCAGTCCGAGGCG
ENST00000378024	ENSG00000124942	AHNAK	set16	ENSG00000124942	AHNAK	-46	13482	13512	31	TTTTATGTCAATTTCAGGGCCCTTGAGATCA	0.927849	-52.9785	0.387097	1	1	1	1	1	1	5	1	1	0	9	1	A9	TGTCCTGCCAAGCCGGTTATGTTCT	10	1	A10	GTTACTTCGGGTCCATGACCCAGTC	TGTCCTGCCAAGCCGGTTATGTTCTTTACACTCGGACCTCGTCGACATGCATTTTTTATGTCAATTTCAGGGCCCTTGAGATCACCTCCTAAGTTTCGAGCTGGACTCAGTGGTTACTTCGGGTCCATGACCCAGTC	TGTCCTGCCAAGCCGGTTATGTTCTTTACACTCGGACCTCGTCGACATGCATTTTTTATGTCAATTTCAGGGCCCTTGAGATCACCTCCTAAGTTTCGAGCTGGACTCAGTGGTTACTTCGGGTCCATGACCCAGTCAATTGCA
ENST00000378024	ENSG00000124942	AHNAK	set16	ENSG00000124942	AHNAK	-46	13793	13822	30	AATCAATGTCACTCATGGAGATTTGTGGGC	0.977849	-53.2785	0.433333	1	1	1	1	1	1	5	1	1	0	9	1	A9	TGTCCTGCCAAGCCGGTTATGTTCT	10	1	A10	GTTACTTCGGGTCCATGACCCAGTC	TGTCCTGCCAAGCCGGTTATGTTCTTTACACTCGGACCTCGTCGACATGCATTAATCAATGTCACTCATGGAGATTTGTGGGCCCTCCTAAGTTTCGAGCTGGACTCAGTGGTTACTTCGGGTCCATGACCCAGTC	TGTCCTGCCAAGCCGGTTATGTTCTTTACACTCGGACCTCGTCGACATGCATTAATCAATGTCACTCATGGAGATTTGTGGGCCCTCCTAAGTTTCGAGCTGGACTCAGTGGTTACTTCGGGTCCATGACCCAGTCTTTTCGCC
ENST00000378024	ENSG00000124942	AHNAK	set16	ENSG00000124942	AHNAK	-46	13542	13574	33	TTCAATTTTCCTTCCGGACCTTCAATATTGACA	0.982151	-54.2785	0.363636	1	1	1	1	1	1	5	1	1	0	9	1	A9	TGTCCTGCCAAGCCGGTTATGTTCT	10	1	A10	GTTACTTCGGGTCCATGACCCAGTC	TGTCCTGCCAAGCCGGTTATGTTCTTTACACTCGGACCTCGTCGACATGCATTTTCAATTTTCCTTCCGGACCTTCAATATTGACACCTCCTAAGTTTCGAGCTGGACTCAGTGGTTACTTCGGGTCCATGACCCAGTC	TGTCCTGCCAAGCCGGTTATGTTCTTTACACTCGGACCTCGTCGACATGCATTTTCAATTTTCCTTCCGGACCTTCAATATTGACACCTCCTAAGTTTCGAGCTGGACTCAGTGGTTACTTCGGGTCCATGACCCAGTCGAGAT
ENST00000378024	ENSG00000124942	AHNAK	set16	ENSG00000124942	AHNAK	-46	13514	13540	27	CAGGTGTGTCAATGTCCAAACTGGGGC	0.972151	-52.7785	0.555556	1	1	1	1	1	1	5	1	1	0	9	1	A9	TGTCCTGCCAAGCCGGTTATGTTCT	10	1	A10	GTTACTTCGGGTCCATGACCCAGTC	TGTCCTGCCAAGCCGGTTATGTTCTTTACACTCGGACCTCGTCGACATGCATTCAGGTGTGTCAATGTCCAAACTGGGGCCCTCCTAAGTTTCGAGCTGGACTCAGTGGTTACTTCGGGTCCATGACCCAGTC	TGTCCTGCCAAGCCGGTTATGTTCTTTACACTCGGACCTCGTCGACATGCATTCAGGTGTGTCAATGTCCAAACTGGGGCCCTCCTAAGTTTCGAGCTGGACTCAGTGGTTACTTCGGGTCCATGACCCAGTCGTCATAACCCA
ENST00000378024	ENSG00000124942	AHNAK	set16	ENSG00000124942	AHNAK	-46	12506	12534	29	CACTTTGGGTCCTGAGACATCAATGTCAG	0.927849	-52.6785	0.482759	1	1	1	1	1	1	5	1	1	0	9	1	A9	TGTCCTGCCAAGCCGGTTATGTTCT	10	1	A10	GTTACTTCGGGTCCATGACCCAGTC	TGTCCTGCCAAGCCGGTTATGTTCTTTACACTCGGACCTCGTCGACATGCATTCACTTTGGGTCCTGAGACATCAATGTCAGCCTCCTAAGTTTCGAGCTGGACTCAGTGGTTACTTCGGGTCCATGACCCAGTC	TGTCCTGCCAAGCCGGTTATGTTCTTTACACTCGGACCTCGTCGACATGCATTCACTTTGGGTCCTGAGACATCAATGTCAGCCTCCTAAGTTTCGAGCTGGACTCAGTGGTTACTTCGGGTCCATGACCCAGTCGTAAGGGTA
ENST00000378024	ENSG00000124942	AHNAK	set16	ENSG00000124942	AHNAK	-46	12476	12504	29	TTTGGGCAAATTAACATCCACTTCTGGGC	0.897849	-51.8785	0.448276	1	1	1	1	1	1	5	1	1	0	9	1	A9	TGTCCTGCCAAGCCGGTTATGTTCT	10	1	A10	GTTACTTCGGGTCCATGACCCAGTC	TGTCCTGCCAAGCCGGTTATGTTCTTTACACTCGGACCTCGTCGACATGCATTTTTGGGCAAATTAACATCCACTTCTGGGCCCTCCTAAGTTTCGAGCTGGACTCAGTGGTTACTTCGGGTCCATGACCCAGTC	TGTCCTGCCAAGCCGGTTATGTTCTTTACACTCGGACCTCGTCGACATGCATTTTTGGGCAAATTAACATCCACTTCTGGGCCCTCCTAAGTTTCGAGCTGGACTCAGTGGTTACTTCGGGTCCATGACCCAGTCTCGGAAGAG
ENST00000378024	ENSG00000124942	AHNAK	set16	ENSG00000124942	AHNAK	-46	13392	13420	29	AGTCAATGTCAGGCATGGAGATTTTGGGG	0.942151	-53.6785	0.482759	1	1	1	1	1	1	5	1	1	0	9	1	A9	TGTCCTGCCAAGCCGGTTATGTTCT	10	1	A10	GTTACTTCGGGTCCATGACCCAGTC	TGTCCTGCCAAGCCGGTTATGTTCTTTACACTCGGACCTCGTCGACATGCATTAGTCAATGTCAGGCATGGAGATTTTGGGGCCTCCTAAGTTTCGAGCTGGACTCAGTGGTTACTTCGGGTCCATGACCCAGTC	TGTCCTGCCAAGCCGGTTATGTTCTTTACACTCGGACCTCGTCGACATGCATTAGTCAATGTCAGGCATGGAGATTTTGGGGCCTCCTAAGTTTCGAGCTGGACTCAGTGGTTACTTCGGGTCCATGACCCAGTCACTTTTCAC
ENST00000378024	ENSG00000124942	AHNAK	set16	ENSG00000124942	AHNAK	-46	13273	13300	28	CTTTGGGGCCAGAAATCTCAATGTCAGC	0.887849	-51.9785	0.5	1	1	1	1	1	1	5	1	1	0	9	1	A9	TGTCCTGCCAAGCCGGTTATGTTCT	10	1	A10	GTTACTTCGGGTCCATGACCCAGTC	TGTCCTGCCAAGCCGGTTATGTTCTTTACACTCGGACCTCGTCGACATGCATTCTTTGGGGCCAGAAATCTCAATGTCAGCCCTCCTAAGTTTCGAGCTGGACTCAGTGGTTACTTCGGGTCCATGACCCAGTC	TGTCCTGCCAAGCCGGTTATGTTCTTTACACTCGGACCTCGTCGACATGCATTCTTTGGGGCCAGAAATCTCAATGTCAGCCCTCCTAAGTTTCGAGCTGGACTCAGTGGTTACTTCGGGTCCATGACCCAGTCAATTCTCACC
ENST00000378024	ENSG00000124942	AHNAK	set16	ENSG00000124942	AHNAK	-46	12386	12413	28	CAGTCTGGGCCATGAACATCCACATCTG	0.922151	-53.7785	0.535714	1	1	1	1	1	1	5	1	1	0	9	1	A9	TGTCCTGCCAAGCCGGTTATGTTCT	10	1	A10	GTTACTTCGGGTCCATGACCCAGTC	TGTCCTGCCAAGCCGGTTATGTTCTTTACACTCGGACCTCGTCGACATGCATTCAGTCTGGGCCATGAACATCCACATCTGCCTCCTAAGTTTCGAGCTGGACTCAGTGGTTACTTCGGGTCCATGACCCAGTC	TGTCCTGCCAAGCCGGTTATGTTCTTTACACTCGGACCTCGTCGACATGCATTCAGTCTGGGCCATGAACATCCACATCTGCCTCCTAAGTTTCGAGCTGGACTCAGTGGTTACTTCGGGTCCATGACCCAGTCCCGTTTATTT
ENST00000378024	ENSG00000124942	AHNAK	set16	ENSG00000124942	AHNAK	-46	8230	8256	27	TGAGACATCAATGTCAGCCTTGGGCAG	0.907849	-52.0785	0.518519	1	1	1	1	1	1	5	1	1	0	9	1	A9	TGTCCTGCCAAGCCGGTTATGTTCT	10	1	A10	GTTACTTCGGGTCCATGACCCAGTC	TGTCCTGCCAAGCCGGTTATGTTCTTTACACTCGGACCTCGTCGACATGCATTTGAGACATCAATGTCAGCCTTGGGCAGCCTCCTAAGTTTCGAGCTGGACTCAGTGGTTACTTCGGGTCCATGACCCAGTC	TGTCCTGCCAAGCCGGTTATGTTCTTTACACTCGGACCTCGTCGACATGCATTTGAGACATCAATGTCAGCCTTGGGCAGCCTCCTAAGTTTCGAGCTGGACTCAGTGGTTACTTCGGGTCCATGACCCAGTCAGGGCAACTGC
ENST00000378024	ENSG00000124942	AHNAK	set16	ENSG00000124942	AHNAK	-46	14800	14828	29	GGTCCTTTCAAATCCAGGTCAACATCAGG	0.967849	-52.8785	0.482759	1	1	1	1	1	1	5	1	1	0	9	1	A9	TGTCCTGCCAAGCCGGTTATGTTCT	10	1	A10	GTTACTTCGGGTCCATGACCCAGTC	TGTCCTGCCAAGCCGGTTATGTTCTTTACACTCGGACCTCGTCGACATGCATTGGTCCTTTCAAATCCAGGTCAACATCAGGCCTCCTAAGTTTCGAGCTGGACTCAGTGGTTACTTCGGGTCCATGACCCAGTC	TGTCCTGCCAAGCCGGTTATGTTCTTTACACTCGGACCTCGTCGACATGCATTGGTCCTTTCAAATCCAGGTCAACATCAGGCCTCCTAAGTTTCGAGCTGGACTCAGTGGTTACTTCGGGTCCATGACCCAGTCCCCTGATAG
ENST00000378024	ENSG00000124942	AHNAK	set16	ENSG00000124942	AHNAK	-46	14765	14798	34	ATGGAGATCTTGGGAGCTTTGATATTTATTTCAG	0.992151	-54.7785	0.352941	1	1	1	1	1	1	5	1	1	0	9	1	A9	TGTCCTGCCAAGCCGGTTATGTTCT	10	1	A10	GTTACTTCGGGTCCATGACCCAGTC	TGTCCTGCCAAGCCGGTTATGTTCTTTACACTCGGACCTCGTCGACATGCATTATGGAGATCTTGGGAGCTTTGATATTTATTTCAGCCTCCTAAGTTTCGAGCTGGACTCAGTGGTTACTTCGGGTCCATGACCCAGTC	TGTCCTGCCAAGCCGGTTATGTTCTTTACACTCGGACCTCGTCGACATGCATTATGGAGATCTTGGGAGCTTTGATATTTATTTCAGCCTCCTAAGTTTCGAGCTGGACTCAGTGGTTACTTCGGGTCCATGACCCAGTCGGAT
ENST00000333244	ENSG00000185567	AHNAK2	set16	ENSG00000185567	AHNAK2	-46	2632	2662	31	GATGGCATCTTGAACTTGGGCATTTTGAACT	0.972151	-53.9785	0.419355	1	1	1	1	1	1	5	1	1	0	11	1	A11	TTTCGTTTCACTCCCCGGGTTGGTA	12	1	A12	TTATAGGAGTTCCAGCCTCTCGGGT	TTTCGTTTCACTCCCCGGGTTGGTATTACACTCGGACCTCGTCGACATGCATTGATGGCATCTTGAACTTGGGCATTTTGAACTCCTCCTAAGTTTCGAGCTGGACTCAGTGTTATAGGAGTTCCAGCCTCTCGGGT	TTTCGTTTCACTCCCCGGGTTGGTATTACACTCGGACCTCGTCGACATGCATTGATGGCATCTTGAACTTGGGCATTTTGAACTCCTCCTAAGTTTCGAGCTGGACTCAGTGTTATAGGAGTTCCAGCCTCTCGGGTTTCGTTA
ENST00000333244	ENSG00000185567	AHNAK2	set16	ENSG00000185567	AHNAK2	-46	9606	9631	26	AAGACCTCAATGGACTTGCCTGGGGC	0.952151	-53.0785	0.576923	1	1	1	1	1	1	5	1	1	0	11	1	A11	TTTCGTTTCACTCCCCGGGTTGGTA	12	1	A12	TTATAGGAGTTCCAGCCTCTCGGGT	TTTCGTTTCACTCCCCGGGTTGGTATTACACTCGGACCTCGTCGACATGCATTAAGACCTCAATGGACTTGCCTGGGGCCCTCCTAAGTTTCGAGCTGGACTCAGTGTTATAGGAGTTCCAGCCTCTCGGGT	TTTCGTTTCACTCCCCGGGTTGGTATTACACTCGGACCTCGTCGACATGCATTAAGACCTCAATGGACTTGCCTGGGGCCCTCCTAAGTTTCGAGCTGGACTCAGTGTTATAGGAGTTCCAGCCTCTCGGGTCTGCAGATAGAG
ENST00000333244	ENSG00000185567	AHNAK2	set16	ENSG00000185567	AHNAK2	-46	11192	11216	25	GGCAGAAGGGGGCTGAATGCTGAGG	0.942151	-53.0785	0.64	1	1	1	1	1	1	5	1	1	0	11	1	A11	TTTCGTTTCACTCCCCGGGTTGGTA	12	1	A12	TTATAGGAGTTCCAGCCTCTCGGGT	TTTCGTTTCACTCCCCGGGTTGGTATTACACTCGGACCTCGTCGACATGCATTGGCAGAAGGGGGCTGAATGCTGAGGCCTCCTAAGTTTCGAGCTGGACTCAGTGTTATAGGAGTTCCAGCCTCTCGGGT	TTTCGTTTCACTCCCCGGGTTGGTATTACACTCGGACCTCGTCGACATGCATTGGCAGAAGGGGGCTGAATGCTGAGGCCTCCTAAGTTTCGAGCTGGACTCAGTGTTATAGGAGTTCCAGCCTCTCGGGTCGACAGTCGGTCT
ENST00000333244	ENSG00000185567	AHNAK2	set16	ENSG00000185567	AHNAK2	-46	11140	11164	25	GAGGGGAGACTCACATCGGCTTCCA	0.927849	-52.0785	0.6	1	1	1	1	1	1	5	1	1	0	11	1	A11	TTTCGTTTCACTCCCCGGGTTGGTA	12	1	A12	TTATAGGAGTTCCAGCCTCTCGGGT	TTTCGTTTCACTCCCCGGGTTGGTATTACACTCGGACCTCGTCGACATGCATTGAGGGGAGACTCACATCGGCTTCCACCTCCTAAGTTTCGAGCTGGACTCAGTGTTATAGGAGTTCCAGCCTCTCGGGT	TTTCGTTTCACTCCCCGGGTTGGTATTACACTCGGACCTCGTCGACATGCATTGAGGGGAGACTCACATCGGCTTCCACCTCCTAAGTTTCGAGCTGGACTCAGTGTTATAGGAGTTCCAGCCTCTCGGGTGTAAGGTAATGTA
ENST00000333244	ENSG00000185567	AHNAK2	set16	ENSG00000185567	AHNAK2	-46	10732	10757	26	TTCCACATCCACTTGGACAGCCTGGA	0.957849	-52.1785	0.538462	1	1	1	1	1	1	5	1	1	0	11	1	A11	TTTCGTTTCACTCCCCGGGTTGGTA	12	1	A12	TTATAGGAGTTCCAGCCTCTCGGGT	TTTCGTTTCACTCCCCGGGTTGGTATTACACTCGGACCTCGTCGACATGCATTTTCCACATCCACTTGGACAGCCTGGACCTCCTAAGTTTCGAGCTGGACTCAGTGTTATAGGAGTTCCAGCCTCTCGGGT	TTTCGTTTCACTCCCCGGGTTGGTATTACACTCGGACCTCGTCGACATGCATTTTCCACATCCACTTGGACAGCCTGGACCTCCTAAGTTTCGAGCTGGACTCAGTGTTATAGGAGTTCCAGCCTCTCGGGTACTAGGAAAACA
ENST00000333244	ENSG00000185567	AHNAK2	set16	ENSG00000185567	AHNAK2	-46	10606	10630	25	ACATCCAGCGAGGCCTCGATGGACC	0.922151	-53.4785	0.64	1	1	1	1	1	1	5	1	1	0	11	1	A11	TTTCGTTTCACTCCCCGGGTTGGTA	12	1	A12	TTATAGGAGTTCCAGCCTCTCGGGT	TTTCGTTTCACTCCCCGGGTTGGTATTACACTCGGACCTCGTCGACATGCATTACATCCAGCGAGGCCTCGATGGACCCCTCCTAAGTTTCGAGCTGGACTCAGTGTTATAGGAGTTCCAGCCTCTCGGGT	TTTCGTTTCACTCCCCGGGTTGGTATTACACTCGGACCTCGTCGACATGCATTACATCCAGCGAGGCCTCGATGGACCCCTCCTAAGTTTCGAGCTGGACTCAGTGTTATAGGAGTTCCAGCCTCTCGGGTTCTTGCGAGCAAA
ENST00000333244	ENSG00000185567	AHNAK2	set16	ENSG00000185567	AHNAK2	-46	11113	11138	26	CTTGGGTGCAGACACATCCACCGAGG	0.942151	-53.0785	0.615385	1	1	1	1	1	1	5	1	1	0	11	1	A11	TTTCGTTTCACTCCCCGGGTTGGTA	12	1	A12	TTATAGGAGTTCCAGCCTCTCGGGT	TTTCGTTTCACTCCCCGGGTTGGTATTACACTCGGACCTCGTCGACATGCATTCTTGGGTGCAGACACATCCACCGAGGCCTCCTAAGTTTCGAGCTGGACTCAGTGTTATAGGAGTTCCAGCCTCTCGGGT	TTTCGTTTCACTCCCCGGGTTGGTATTACACTCGGACCTCGTCGACATGCATTCTTGGGTGCAGACACATCCACCGAGGCCTCCTAAGTTTCGAGCTGGACTCAGTGTTATAGGAGTTCCAGCCTCTCGGGTCTCTGCTGCTGT
ENST00000333244	ENSG00000185567	AHNAK2	set16	ENSG00000185567	AHNAK2	-46	11058	11086	29	ACCCTGAATGACGGCATCTTGAATTTGGG	0.992151	-53.0785	0.482759	1	1	1	1	1	1	5	1	1	0	11	1	A11	TTTCGTTTCACTCCCCGGGTTGGTA	12	1	A12	TTATAGGAGTTCCAGCCTCTCGGGT	TTTCGTTTCACTCCCCGGGTTGGTATTACACTCGGACCTCGTCGACATGCATTACCCTGAATGACGGCATCTTGAATTTGGGCCTCCTAAGTTTCGAGCTGGACTCAGTGTTATAGGAGTTCCAGCCTCTCGGGT	TTTCGTTTCACTCCCCGGGTTGGTATTACACTCGGACCTCGTCGACATGCATTACCCTGAATGACGGCATCTTGAATTTGGGCCTCCTAAGTTTCGAGCTGGACTCAGTGTTATAGGAGTTCCAGCCTCTCGGGTTCGCGCGGA
ENST00000333244	ENSG00000185567	AHNAK2	set16	ENSG00000185567	AHNAK2	-46	17444	17470	27	TCCTGCTCGGGCAGGATTAACTCTGTT	0.937849	-52.5785	0.518519	1	1	1	0	1	1	4	1	1	0	11	1	A11	TTTCGTTTCACTCCCCGGGTTGGTA	12	1	A12	TTATAGGAGTTCCAGCCTCTCGGGT	TTTCGTTTCACTCCCCGGGTTGGTATTACACTCGGACCTCGTCGACATGCATTTCCTGCTCGGGCAGGATTAACTCTGTTCCTCCTAAGTTTCGAGCTGGACTCAGTGTTATAGGAGTTCCAGCCTCTCGGGT	TTTCGTTTCACTCCCCGGGTTGGTATTACACTCGGACCTCGTCGACATGCATTTCCTGCTCGGGCAGGATTAACTCTGTTCCTCCTAAGTTTCGAGCTGGACTCAGTGTTATAGGAGTTCCAGCCTCTCGGGTTACTGCTGATT
ENST00000333244	ENSG00000185567	AHNAK2	set16	ENSG00000185567	AHNAK2	-46	17417	17442	26	TTGCCGCGGATGTCACCATCACTCTG	0.937849	-52.0785	0.576923	1	1	1	0	1	1	4	1	1	0	11	1	A11	TTTCGTTTCACTCCCCGGGTTGGTA	12	1	A12	TTATAGGAGTTCCAGCCTCTCGGGT	TTTCGTTTCACTCCCCGGGTTGGTATTACACTCGGACCTCGTCGACATGCATTTTGCCGCGGATGTCACCATCACTCTGCCTCCTAAGTTTCGAGCTGGACTCAGTGTTATAGGAGTTCCAGCCTCTCGGGT	TTTCGTTTCACTCCCCGGGTTGGTATTACACTCGGACCTCGTCGACATGCATTTTGCCGCGGATGTCACCATCACTCTGCCTCCTAAGTTTCGAGCTGGACTCAGTGTTATAGGAGTTCCAGCCTCTCGGGTCCTTCGGATCGT
ENST00000333244	ENSG00000185567	AHNAK2	set16	ENSG00000185567	AHNAK2	-46	9813	9839	27	GAAACTGGGCATCTGCAACTTGGGCAG	0.992151	-52.8785	0.555556	1	1	1	1	1	1	5	1	1	0	11	1	A11	TTTCGTTTCACTCCCCGGGTTGGTA	12	1	A12	TTATAGGAGTTCCAGCCTCTCGGGT	TTTCGTTTCACTCCCCGGGTTGGTATTACACTCGGACCTCGTCGACATGCATTGAAACTGGGCATCTGCAACTTGGGCAGCCTCCTAAGTTTCGAGCTGGACTCAGTGTTATAGGAGTTCCAGCCTCTCGGGT	TTTCGTTTCACTCCCCGGGTTGGTATTACACTCGGACCTCGTCGACATGCATTGAAACTGGGCATCTGCAACTTGGGCAGCCTCCTAAGTTTCGAGCTGGACTCAGTGTTATAGGAGTTCCAGCCTCTCGGGTCTTTGTTGTAT
ENST00000333244	ENSG00000185567	AHNAK2	set16	ENSG00000185567	AHNAK2	-46	17472	17501	30	TGACCCTTTGCTTTCATCGTCAGCTTTTCT	0.947849	-53.3785	0.433333	1	1	1	0	1	1	4	1	1	0	11	1	A11	TTTCGTTTCACTCCCCGGGTTGGTA	12	1	A12	TTATAGGAGTTCCAGCCTCTCGGGT	TTTCGTTTCACTCCCCGGGTTGGTATTACACTCGGACCTCGTCGACATGCATTTGACCCTTTGCTTTCATCGTCAGCTTTTCTCCTCCTAAGTTTCGAGCTGGACTCAGTGTTATAGGAGTTCCAGCCTCTCGGGT	TTTCGTTTCACTCCCCGGGTTGGTATTACACTCGGACCTCGTCGACATGCATTTGACCCTTTGCTTTCATCGTCAGCTTTTCTCCTCCTAAGTTTCGAGCTGGACTCAGTGTTATAGGAGTTCCAGCCTCTCGGGTTACATCGT
ENST00000333244	ENSG00000185567	AHNAK2	set16	ENSG00000185567	AHNAK2	-46	11641	11665	25	TGCATGGAGGGGAGACTCACATCGG	0.917849	-51.6785	0.6	1	1	1	1	1	1	5	1	1	0	11	1	A11	TTTCGTTTCACTCCCCGGGTTGGTA	12	1	A12	TTATAGGAGTTCCAGCCTCTCGGGT	TTTCGTTTCACTCCCCGGGTTGGTATTACACTCGGACCTCGTCGACATGCATTTGCATGGAGGGGAGACTCACATCGGCCTCCTAAGTTTCGAGCTGGACTCAGTGTTATAGGAGTTCCAGCCTCTCGGGT	TTTCGTTTCACTCCCCGGGTTGGTATTACACTCGGACCTCGTCGACATGCATTTGCATGGAGGGGAGACTCACATCGGCCTCCTAAGTTTCGAGCTGGACTCAGTGTTATAGGAGTTCCAGCCTCTCGGGTTCAAGTTAGCGGC
ENST00000333244	ENSG00000185567	AHNAK2	set16	ENSG00000185567	AHNAK2	-46	6843	6868	26	AAACTGGGCATCTGCAGCTTGGGCAG	0.992151	-52.6785	0.576923	1	1	1	1	1	1	5	1	1	0	11	1	A11	TTTCGTTTCACTCCCCGGGTTGGTA	12	1	A12	TTATAGGAGTTCCAGCCTCTCGGGT	TTTCGTTTCACTCCCCGGGTTGGTATTACACTCGGACCTCGTCGACATGCATTAAACTGGGCATCTGCAGCTTGGGCAGCCTCCTAAGTTTCGAGCTGGACTCAGTGTTATAGGAGTTCCAGCCTCTCGGGT	TTTCGTTTCACTCCCCGGGTTGGTATTACACTCGGACCTCGTCGACATGCATTAAACTGGGCATCTGCAGCTTGGGCAGCCTCCTAAGTTTCGAGCTGGACTCAGTGTTATAGGAGTTCCAGCCTCTCGGGTCATATCGTGTCT
ENST00000333244	ENSG00000185567	AHNAK2	set16	ENSG00000185567	AHNAK2	-46	6661	6686	26	CACCTTGGGTGGAGACACATCCACCG	0.932151	-52.9785	0.615385	1	1	1	1	1	1	5	1	1	0	11	1	A11	TTTCGTTTCACTCCCCGGGTTGGTA	12	1	A12	TTATAGGAGTTCCAGCCTCTCGGGT	TTTCGTTTCACTCCCCGGGTTGGTATTACACTCGGACCTCGTCGACATGCATTCACCTTGGGTGGAGACACATCCACCGCCTCCTAAGTTTCGAGCTGGACTCAGTGTTATAGGAGTTCCAGCCTCTCGGGT	TTTCGTTTCACTCCCCGGGTTGGTATTACACTCGGACCTCGTCGACATGCATTCACCTTGGGTGGAGACACATCCACCGCCTCCTAAGTTTCGAGCTGGACTCAGTGTTATAGGAGTTCCAGCCTCTCGGGTTAACCTTTCATA
ENST00000333244	ENSG00000185567	AHNAK2	set16	ENSG00000185567	AHNAK2	-46	6260	6285	26	CAGTCTGGACCTTCAGGTCGGCAGAA	0.947849	-52.4785	0.576923	1	1	1	1	1	1	5	1	1	0	11	1	A11	TTTCGTTTCACTCCCCGGGTTGGTA	12	1	A12	TTATAGGAGTTCCAGCCTCTCGGGT	TTTCGTTTCACTCCCCGGGTTGGTATTACACTCGGACCTCGTCGACATGCATTCAGTCTGGACCTTCAGGTCGGCAGAACCTCCTAAGTTTCGAGCTGGACTCAGTGTTATAGGAGTTCCAGCCTCTCGGGT	TTTCGTTTCACTCCCCGGGTTGGTATTACACTCGGACCTCGTCGACATGCATTCAGTCTGGACCTTCAGGTCGGCAGAACCTCCTAAGTTTCGAGCTGGACTCAGTGTTATAGGAGTTCCAGCCTCTCGGGTTAGATTCCGGCG
ENST00000333244	ENSG00000185567	AHNAK2	set16	ENSG00000185567	AHNAK2	-46	6103	6132	30	CGAACGACGGCATCTTGAATTTGGGCATTT	0.967849	-52.9785	0.466667	1	1	1	1	1	1	5	1	1	0	11	1	A11	TTTCGTTTCACTCCCCGGGTTGGTA	12	1	A12	TTATAGGAGTTCCAGCCTCTCGGGT	TTTCGTTTCACTCCCCGGGTTGGTATTACACTCGGACCTCGTCGACATGCATTCGAACGACGGCATCTTGAATTTGGGCATTTCCTCCTAAGTTTCGAGCTGGACTCAGTGTTATAGGAGTTCCAGCCTCTCGGGT	TTTCGTTTCACTCCCCGGGTTGGTATTACACTCGGACCTCGTCGACATGCATTCGAACGACGGCATCTTGAATTTGGGCATTTCCTCCTAAGTTTCGAGCTGGACTCAGTGTTATAGGAGTTCCAGCCTCTCGGGTGGTGGCAG
ENST00000333244	ENSG00000185567	AHNAK2	set16	ENSG00000185567	AHNAK2	-46	5973	5997	25	TGCTGGGCAGAGACACCTCGACATC	0.927849	-52.1785	0.6	1	1	1	1	1	1	5	1	1	0	11	1	A11	TTTCGTTTCACTCCCCGGGTTGGTA	12	1	A12	TTATAGGAGTTCCAGCCTCTCGGGT	TTTCGTTTCACTCCCCGGGTTGGTATTACACTCGGACCTCGTCGACATGCATTTGCTGGGCAGAGACACCTCGACATCCCTCCTAAGTTTCGAGCTGGACTCAGTGTTATAGGAGTTCCAGCCTCTCGGGT	TTTCGTTTCACTCCCCGGGTTGGTATTACACTCGGACCTCGTCGACATGCATTTGCTGGGCAGAGACACCTCGACATCCCTCCTAAGTTTCGAGCTGGACTCAGTGTTATAGGAGTTCCAGCCTCTCGGGTCGTAGAGTGCTTC
ENST00000333244	ENSG00000185567	AHNAK2	set16	ENSG00000185567	AHNAK2	-46	5659	5684	26	AGACACATCCACCGAGGCCTCGATGG	0.882151	-53.9785	0.615385	1	1	1	1	1	1	5	1	1	0	11	1	A11	TTTCGTTTCACTCCCCGGGTTGGTA	12	1	A12	TTATAGGAGTTCCAGCCTCTCGGGT	TTTCGTTTCACTCCCCGGGTTGGTATTACACTCGGACCTCGTCGACATGCATTAGACACATCCACCGAGGCCTCGATGGCCTCCTAAGTTTCGAGCTGGACTCAGTGTTATAGGAGTTCCAGCCTCTCGGGT	TTTCGTTTCACTCCCCGGGTTGGTATTACACTCGGACCTCGTCGACATGCATTAGACACATCCACCGAGGCCTCGATGGCCTCCTAAGTTTCGAGCTGGACTCAGTGTTATAGGAGTTCCAGCCTCTCGGGTGCCCGCCCCCTC
ENST00000333244	ENSG00000185567	AHNAK2	set16	ENSG00000185567	AHNAK2	-46	5603	5632	30	GACGGCATCTTGAACTTGGGCATTTTGAAC	0.982151	-53.6785	0.466667	1	1	1	1	1	1	5	1	1	0	11	1	A11	TTTCGTTTCACTCCCCGGGTTGGTA	12	1	A12	TTATAGGAGTTCCAGCCTCTCGGGT	TTTCGTTTCACTCCCCGGGTTGGTATTACACTCGGACCTCGTCGACATGCATTGACGGCATCTTGAACTTGGGCATTTTGAACCCTCCTAAGTTTCGAGCTGGACTCAGTGTTATAGGAGTTCCAGCCTCTCGGGT	TTTCGTTTCACTCCCCGGGTTGGTATTACACTCGGACCTCGTCGACATGCATTGACGGCATCTTGAACTTGGGCATTTTGAACCCTCCTAAGTTTCGAGCTGGACTCAGTGTTATAGGAGTTCCAGCCTCTCGGGTTCACGCTG
ENST00000333244	ENSG00000185567	AHNAK2	set16	ENSG00000185567	AHNAK2	-46	5187	5213	27	CACATCAGCTTCCACCTTCGGCTCAGA	0.972151	-53.5785	0.555556	1	1	1	1	1	1	5	1	1	0	11	1	A11	TTTCGTTTCACTCCCCGGGTTGGTA	12	1	A12	TTATAGGAGTTCCAGCCTCTCGGGT	TTTCGTTTCACTCCCCGGGTTGGTATTACACTCGGACCTCGTCGACATGCATTCACATCAGCTTCCACCTTCGGCTCAGACCTCCTAAGTTTCGAGCTGGACTCAGTGTTATAGGAGTTCCAGCCTCTCGGGT	TTTCGTTTCACTCCCCGGGTTGGTATTACACTCGGACCTCGTCGACATGCATTCACATCAGCTTCCACCTTCGGCTCAGACCTCCTAAGTTTCGAGCTGGACTCAGTGTTATAGGAGTTCCAGCCTCTCGGGTGTGAAATAACC
ENST00000333244	ENSG00000185567	AHNAK2	set16	ENSG00000185567	AHNAK2	-46	4971	4997	27	AGACATCTTCACATCGGGGGCTGTCAC	0.922151	-53.8785	0.555556	1	1	1	1	1	1	5	1	1	0	11	1	A11	TTTCGTTTCACTCCCCGGGTTGGTA	12	1	A12	TTATAGGAGTTCCAGCCTCTCGGGT	TTTCGTTTCACTCCCCGGGTTGGTATTACACTCGGACCTCGTCGACATGCATTAGACATCTTCACATCGGGGGCTGTCACCCTCCTAAGTTTCGAGCTGGACTCAGTGTTATAGGAGTTCCAGCCTCTCGGGT	TTTCGTTTCACTCCCCGGGTTGGTATTACACTCGGACCTCGTCGACATGCATTAGACATCTTCACATCGGGGGCTGTCACCCTCCTAAGTTTCGAGCTGGACTCAGTGTTATAGGAGTTCCAGCCTCTCGGGTGCGGAGTATCG
ENST00000333244	ENSG00000185567	AHNAK2	set16	ENSG00000185567	AHNAK2	-46	4262	4287	26	CAGTGGAAGGGGGCTGAATGCTGAGG	0.902151	-53.5785	0.615385	1	1	1	1	1	1	5	1	1	0	11	1	A11	TTTCGTTTCACTCCCCGGGTTGGTA	12	1	A12	TTATAGGAGTTCCAGCCTCTCGGGT	TTTCGTTTCACTCCCCGGGTTGGTATTACACTCGGACCTCGTCGACATGCATTCAGTGGAAGGGGGCTGAATGCTGAGGCCTCCTAAGTTTCGAGCTGGACTCAGTGTTATAGGAGTTCCAGCCTCTCGGGT	TTTCGTTTCACTCCCCGGGTTGGTATTACACTCGGACCTCGTCGACATGCATTCAGTGGAAGGGGGCTGAATGCTGAGGCCTCCTAAGTTTCGAGCTGGACTCAGTGTTATAGGAGTTCCAGCCTCTCGGGTTCTTAGACCGCA
ENST00000333244	ENSG00000185567	AHNAK2	set16	ENSG00000185567	AHNAK2	-46	8348	8375	28	GAGGTCCACTTCAGGCATCTTGAAACTG	0.867849	-52.0785	0.5	1	1	1	1	1	1	5	1	1	0	11	1	A11	TTTCGTTTCACTCCCCGGGTTGGTA	12	1	A12	TTATAGGAGTTCCAGCCTCTCGGGT	TTTCGTTTCACTCCCCGGGTTGGTATTACACTCGGACCTCGTCGACATGCATTGAGGTCCACTTCAGGCATCTTGAAACTGCCTCCTAAGTTTCGAGCTGGACTCAGTGTTATAGGAGTTCCAGCCTCTCGGGT	TTTCGTTTCACTCCCCGGGTTGGTATTACACTCGGACCTCGTCGACATGCATTGAGGTCCACTTCAGGCATCTTGAAACTGCCTCCTAAGTTTCGAGCTGGACTCAGTGTTATAGGAGTTCCAGCCTCTCGGGTTATCCGTGCT
ENST00000333244	ENSG00000185567	AHNAK2	set16	ENSG00000185567	AHNAK2	-46	8219	8244	26	CAGAGGGGGGCTGAATGCTGATGTCA	0.962151	-53.0785	0.576923	1	1	1	1	1	1	5	1	1	0	11	1	A11	TTTCGTTTCACTCCCCGGGTTGGTA	12	1	A12	TTATAGGAGTTCCAGCCTCTCGGGT	TTTCGTTTCACTCCCCGGGTTGGTATTACACTCGGACCTCGTCGACATGCATTCAGAGGGGGGCTGAATGCTGATGTCACCTCCTAAGTTTCGAGCTGGACTCAGTGTTATAGGAGTTCCAGCCTCTCGGGT	TTTCGTTTCACTCCCCGGGTTGGTATTACACTCGGACCTCGTCGACATGCATTCAGAGGGGGGCTGAATGCTGATGTCACCTCCTAAGTTTCGAGCTGGACTCAGTGTTATAGGAGTTCCAGCCTCTCGGGTACAGTTCAGGCT
ENST00000333244	ENSG00000185567	AHNAK2	set16	ENSG00000185567	AHNAK2	-46	7580	7610	31	CGGCATCTTGAACTTGGGAATTTTGAACCTG	0.982151	-53.6785	0.451613	1	1	1	1	1	1	5	1	1	0	11	1	A11	TTTCGTTTCACTCCCCGGGTTGGTA	12	1	A12	TTATAGGAGTTCCAGCCTCTCGGGT	TTTCGTTTCACTCCCCGGGTTGGTATTACACTCGGACCTCGTCGACATGCATTCGGCATCTTGAACTTGGGAATTTTGAACCTGCCTCCTAAGTTTCGAGCTGGACTCAGTGTTATAGGAGTTCCAGCCTCTCGGGT	TTTCGTTTCACTCCCCGGGTTGGTATTACACTCGGACCTCGTCGACATGCATTCGGCATCTTGAACTTGGGAATTTTGAACCTGCCTCCTAAGTTTCGAGCTGGACTCAGTGTTATAGGAGTTCCAGCCTCTCGGGTGAGGGAA
ENST00000333244	ENSG00000185567	AHNAK2	set16	ENSG00000185567	AHNAK2	-46	3188	3213	26	GTGCAGACACATCCACCAAGGCCTTG	0.947849	-51.9785	0.576923	1	1	1	1	1	1	5	1	1	0	11	1	A11	TTTCGTTTCACTCCCCGGGTTGGTA	12	1	A12	TTATAGGAGTTCCAGCCTCTCGGGT	TTTCGTTTCACTCCCCGGGTTGGTATTACACTCGGACCTCGTCGACATGCATTGTGCAGACACATCCACCAAGGCCTTGCCTCCTAAGTTTCGAGCTGGACTCAGTGTTATAGGAGTTCCAGCCTCTCGGGT	TTTCGTTTCACTCCCCGGGTTGGTATTACACTCGGACCTCGTCGACATGCATTGTGCAGACACATCCACCAAGGCCTTGCCTCCTAAGTTTCGAGCTGGACTCAGTGTTATAGGAGTTCCAGCCTCTCGGGTATGTAAGGGCCG
ENST00000333244	ENSG00000185567	AHNAK2	set16	ENSG00000185567	AHNAK2	-46	3133	3161	29	GAACGACGGCATCTTGAACTTGGGCATTT	0.967849	-52.9785	0.482759	1	1	1	1	1	1	5	1	1	0	11	1	A11	TTTCGTTTCACTCCCCGGGTTGGTA	12	1	A12	TTATAGGAGTTCCAGCCTCTCGGGT	TTTCGTTTCACTCCCCGGGTTGGTATTACACTCGGACCTCGTCGACATGCATTGAACGACGGCATCTTGAACTTGGGCATTTCCTCCTAAGTTTCGAGCTGGACTCAGTGTTATAGGAGTTCCAGCCTCTCGGGT	TTTCGTTTCACTCCCCGGGTTGGTATTACACTCGGACCTCGTCGACATGCATTGAACGACGGCATCTTGAACTTGGGCATTTCCTCCTAAGTTTCGAGCTGGACTCAGTGTTATAGGAGTTCCAGCCTCTCGGGTGCCGGATAA
ENST00000333244	ENSG00000185567	AHNAK2	set16	ENSG00000185567	AHNAK2	-46	2816	2842	27	GGAAGTTTCACATCCACTTGGCCAGCC	0.952151	-53.2785	0.555556	1	1	1	1	1	1	5	1	1	0	11	1	A11	TTTCGTTTCACTCCCCGGGTTGGTA	12	1	A12	TTATAGGAGTTCCAGCCTCTCGGGT	TTTCGTTTCACTCCCCGGGTTGGTATTACACTCGGACCTCGTCGACATGCATTGGAAGTTTCACATCCACTTGGCCAGCCCCTCCTAAGTTTCGAGCTGGACTCAGTGTTATAGGAGTTCCAGCCTCTCGGGT	TTTCGTTTCACTCCCCGGGTTGGTATTACACTCGGACCTCGTCGACATGCATTGGAAGTTTCACATCCACTTGGCCAGCCCCTCCTAAGTTTCGAGCTGGACTCAGTGTTATAGGAGTTCCAGCCTCTCGGGTTTAGGTGGGTT
ENST00000333244	ENSG00000185567	AHNAK2	set16	ENSG00000185567	AHNAK2	-46	2500	2526	27	ACAGAGACATCTTCACATCGGGGGCTG	0.962151	-53.4785	0.555556	1	1	1	1	1	1	5	1	1	0	11	1	A11	TTTCGTTTCACTCCCCGGGTTGGTA	12	1	A12	TTATAGGAGTTCCAGCCTCTCGGGT	TTTCGTTTCACTCCCCGGGTTGGTATTACACTCGGACCTCGTCGACATGCATTACAGAGACATCTTCACATCGGGGGCTGCCTCCTAAGTTTCGAGCTGGACTCAGTGTTATAGGAGTTCCAGCCTCTCGGGT	TTTCGTTTCACTCCCCGGGTTGGTATTACACTCGGACCTCGTCGACATGCATTACAGAGACATCTTCACATCGGGGGCTGCCTCCTAAGTTTCGAGCTGGACTCAGTGTTATAGGAGTTCCAGCCTCTCGGGTCAAACTGAAAC
ENST00000333244	ENSG00000185567	AHNAK2	set16	ENSG00000185567	AHNAK2	-46	1326	1352	27	GCAAAGTCTAGGGTCACCGAGCTCTGT	0.972151	-53.7785	0.555556	1	1	1	1	1	1	5	1	1	0	11	1	A11	TTTCGTTTCACTCCCCGGGTTGGTA	12	1	A12	TTATAGGAGTTCCAGCCTCTCGGGT	TTTCGTTTCACTCCCCGGGTTGGTATTACACTCGGACCTCGTCGACATGCATTGCAAAGTCTAGGGTCACCGAGCTCTGTCCTCCTAAGTTTCGAGCTGGACTCAGTGTTATAGGAGTTCCAGCCTCTCGGGT	TTTCGTTTCACTCCCCGGGTTGGTATTACACTCGGACCTCGTCGACATGCATTGCAAAGTCTAGGGTCACCGAGCTCTGTCCTCCTAAGTTTCGAGCTGGACTCAGTGTTATAGGAGTTCCAGCCTCTCGGGTGCGCCCACAAG
ENST00000333244	ENSG00000185567	AHNAK2	set16	ENSG00000185567	AHNAK2	-46	1300	1324	25	GGCAATGGCATGCTCTGAGCAGGCA	0.997849	-52.5785	0.6	1	1	1	1	1	1	5	1	1	0	11	1	A11	TTTCGTTTCACTCCCCGGGTTGGTA	12	1	A12	TTATAGGAGTTCCAGCCTCTCGGGT	TTTCGTTTCACTCCCCGGGTTGGTATTACACTCGGACCTCGTCGACATGCATTGGCAATGGCATGCTCTGAGCAGGCACCTCCTAAGTTTCGAGCTGGACTCAGTGTTATAGGAGTTCCAGCCTCTCGGGT	TTTCGTTTCACTCCCCGGGTTGGTATTACACTCGGACCTCGTCGACATGCATTGGCAATGGCATGCTCTGAGCAGGCACCTCCTAAGTTTCGAGCTGGACTCAGTGTTATAGGAGTTCCAGCCTCTCGGGTTGGGCGATGATTT
ENST00000333244	ENSG00000185567	AHNAK2	set16	ENSG00000185567	AHNAK2	-46	904	933	30	ATTGAAATTTTGGCCAAGAGAGCCTCTCCC	0.872151	-54.9785	0.466667	1	1	1	1	1	1	5	1	1	0	11	1	A11	TTTCGTTTCACTCCCCGGGTTGGTA	12	1	A12	TTATAGGAGTTCCAGCCTCTCGGGT	TTTCGTTTCACTCCCCGGGTTGGTATTACACTCGGACCTCGTCGACATGCATTATTGAAATTTTGGCCAAGAGAGCCTCTCCCCCTCCTAAGTTTCGAGCTGGACTCAGTGTTATAGGAGTTCCAGCCTCTCGGGT	TTTCGTTTCACTCCCCGGGTTGGTATTACACTCGGACCTCGTCGACATGCATTATTGAAATTTTGGCCAAGAGAGCCTCTCCCCCTCCTAAGTTTCGAGCTGGACTCAGTGTTATAGGAGTTCCAGCCTCTCGGGTGATAGGGT
ENST00000333244	ENSG00000185567	AHNAK2	set16	ENSG00000185567	AHNAK2	-46	794	820	27	GTCTCTCTGCACCCATCAGCAACATCC	0.952151	-53.7785	0.555556	1	1	1	1	1	1	5	1	1	0	11	1	A11	TTTCGTTTCACTCCCCGGGTTGGTA	12	1	A12	TTATAGGAGTTCCAGCCTCTCGGGT	TTTCGTTTCACTCCCCGGGTTGGTATTACACTCGGACCTCGTCGACATGCATTGTCTCTCTGCACCCATCAGCAACATCCCCTCCTAAGTTTCGAGCTGGACTCAGTGTTATAGGAGTTCCAGCCTCTCGGGT	TTTCGTTTCACTCCCCGGGTTGGTATTACACTCGGACCTCGTCGACATGCATTGTCTCTCTGCACCCATCAGCAACATCCCCTCCTAAGTTTCGAGCTGGACTCAGTGTTATAGGAGTTCCAGCCTCTCGGGTGTAGCTGTTCC
ENST00000333244	ENSG00000185567	AHNAK2	set16	ENSG00000185567	AHNAK2	-46	18307	18335	29	TGGGATGCAGCACTTTCTTTATTGCCCAT	0.977849	-52.8785	0.448276	1	1	1	0	1	1	4	1	1	0	11	1	A11	TTTCGTTTCACTCCCCGGGTTGGTA	12	1	A12	TTATAGGAGTTCCAGCCTCTCGGGT	TTTCGTTTCACTCCCCGGGTTGGTATTACACTCGGACCTCGTCGACATGCATTTGGGATGCAGCACTTTCTTTATTGCCCATCCTCCTAAGTTTCGAGCTGGACTCAGTGTTATAGGAGTTCCAGCCTCTCGGGT	TTTCGTTTCACTCCCCGGGTTGGTATTACACTCGGACCTCGTCGACATGCATTTGGGATGCAGCACTTTCTTTATTGCCCATCCTCCTAAGTTTCGAGCTGGACTCAGTGTTATAGGAGTTCCAGCCTCTCGGGTCAGCTCTCA
ENST00000333244	ENSG00000185567	AHNAK2	set16	ENSG00000185567	AHNAK2	-46	18252	18279	28	TGCATTCTGGCTGCAGCGTGTACATTAG	0.917849	-52.4785	0.5	1	1	1	0	1	1	4	1	1	0	11	1	A11	TTTCGTTTCACTCCCCGGGTTGGTA	12	1	A12	TTATAGGAGTTCCAGCCTCTCGGGT	TTTCGTTTCACTCCCCGGGTTGGTATTACACTCGGACCTCGTCGACATGCATTTGCATTCTGGCTGCAGCGTGTACATTAGCCTCCTAAGTTTCGAGCTGGACTCAGTGTTATAGGAGTTCCAGCCTCTCGGGT	TTTCGTTTCACTCCCCGGGTTGGTATTACACTCGGACCTCGTCGACATGCATTTGCATTCTGGCTGCAGCGTGTACATTAGCCTCCTAAGTTTCGAGCTGGACTCAGTGTTATAGGAGTTCCAGCCTCTCGGGTTTCCCCCTAG
ENST00000333244	ENSG00000185567	AHNAK2	set16	ENSG00000185567	AHNAK2	-46	18178	18201	24	GGATGCTGGCAGGCCAGTGGACAT	0.927849	-51.3785	0.625	1	1	1	0	1	1	4	1	1	0	11	1	A11	TTTCGTTTCACTCCCCGGGTTGGTA	12	1	A12	TTATAGGAGTTCCAGCCTCTCGGGT	TTTCGTTTCACTCCCCGGGTTGGTATTACACTCGGACCTCGTCGACATGCATTGGATGCTGGCAGGCCAGTGGACATCCTCCTAAGTTTCGAGCTGGACTCAGTGTTATAGGAGTTCCAGCCTCTCGGGT	TTTCGTTTCACTCCCCGGGTTGGTATTACACTCGGACCTCGTCGACATGCATTGGATGCTGGCAGGCCAGTGGACATCCTCCTAAGTTTCGAGCTGGACTCAGTGTTATAGGAGTTCCAGCCTCTCGGGTCCGGAGGGGCACTA
ENST00000333244	ENSG00000185567	AHNAK2	set16	ENSG00000185567	AHNAK2	-46	18094	18119	26	CACTGGCCATCACCCTTTTGCCCAGC	0.852151	-53.7785	0.615385	1	1	1	0	1	1	4	1	1	0	11	1	A11	TTTCGTTTCACTCCCCGGGTTGGTA	12	1	A12	TTATAGGAGTTCCAGCCTCTCGGGT	TTTCGTTTCACTCCCCGGGTTGGTATTACACTCGGACCTCGTCGACATGCATTCACTGGCCATCACCCTTTTGCCCAGCCCTCCTAAGTTTCGAGCTGGACTCAGTGTTATAGGAGTTCCAGCCTCTCGGGT	TTTCGTTTCACTCCCCGGGTTGGTATTACACTCGGACCTCGTCGACATGCATTCACTGGCCATCACCCTTTTGCCCAGCCCTCCTAAGTTTCGAGCTGGACTCAGTGTTATAGGAGTTCCAGCCTCTCGGGTAAGGGAGGAATA
ENST00000333244	ENSG00000185567	AHNAK2	set16	ENSG00000185567	AHNAK2	-46	17839	17868	30	TGTTCTGTTGGGTATTATGGACAGGTCTCT	0.972151	-53.9785	0.433333	1	1	1	0	1	1	4	1	1	0	11	1	A11	TTTCGTTTCACTCCCCGGGTTGGTA	12	1	A12	TTATAGGAGTTCCAGCCTCTCGGGT	TTTCGTTTCACTCCCCGGGTTGGTATTACACTCGGACCTCGTCGACATGCATTTGTTCTGTTGGGTATTATGGACAGGTCTCTCCTCCTAAGTTTCGAGCTGGACTCAGTGTTATAGGAGTTCCAGCCTCTCGGGT	TTTCGTTTCACTCCCCGGGTTGGTATTACACTCGGACCTCGTCGACATGCATTTGTTCTGTTGGGTATTATGGACAGGTCTCTCCTCCTAAGTTTCGAGCTGGACTCAGTGTTATAGGAGTTCCAGCCTCTCGGGTACAAAGTC
ENST00000333244	ENSG00000185567	AHNAK2	set16	ENSG00000185567	AHNAK2	-46	17773	17800	28	AGTGCCTCTGAGTACCGTGTGAATTCTG	0.887849	-52.3785	0.5	1	1	1	0	1	1	4	1	1	0	11	1	A11	TTTCGTTTCACTCCCCGGGTTGGTA	12	1	A12	TTATAGGAGTTCCAGCCTCTCGGGT	TTTCGTTTCACTCCCCGGGTTGGTATTACACTCGGACCTCGTCGACATGCATTAGTGCCTCTGAGTACCGTGTGAATTCTGCCTCCTAAGTTTCGAGCTGGACTCAGTGTTATAGGAGTTCCAGCCTCTCGGGT	TTTCGTTTCACTCCCCGGGTTGGTATTACACTCGGACCTCGTCGACATGCATTAGTGCCTCTGAGTACCGTGTGAATTCTGCCTCCTAAGTTTCGAGCTGGACTCAGTGTTATAGGAGTTCCAGCCTCTCGGGTTTAAACAAGG
ENST00000333244	ENSG00000185567	AHNAK2	set16	ENSG00000185567	AHNAK2	-46	12037	12066	30	ACGGCATCTTGAACTTGGGCATTTTGAACT	0.967849	-53.0785	0.433333	1	1	1	1	1	1	5	1	1	0	11	1	A11	TTTCGTTTCACTCCCCGGGTTGGTA	12	1	A12	TTATAGGAGTTCCAGCCTCTCGGGT	TTTCGTTTCACTCCCCGGGTTGGTATTACACTCGGACCTCGTCGACATGCATTACGGCATCTTGAACTTGGGCATTTTGAACTCCTCCTAAGTTTCGAGCTGGACTCAGTGTTATAGGAGTTCCAGCCTCTCGGGT	TTTCGTTTCACTCCCCGGGTTGGTATTACACTCGGACCTCGTCGACATGCATTACGGCATCTTGAACTTGGGCATTTTGAACTCCTCCTAAGTTTCGAGCTGGACTCAGTGTTATAGGAGTTCCAGCCTCTCGGGTGCAATGGG
ENST00000333244	ENSG00000185567	AHNAK2	set16	ENSG00000185567	AHNAK2	-46	11694	11719	26	GTCAGGTCGGCAGAATGGGGCTGAAT	0.992151	-52.7785	0.576923	1	1	1	1	1	1	5	1	1	0	11	1	A11	TTTCGTTTCACTCCCCGGGTTGGTA	12	1	A12	TTATAGGAGTTCCAGCCTCTCGGGT	TTTCGTTTCACTCCCCGGGTTGGTATTACACTCGGACCTCGTCGACATGCATTGTCAGGTCGGCAGAATGGGGCTGAATCCTCCTAAGTTTCGAGCTGGACTCAGTGTTATAGGAGTTCCAGCCTCTCGGGT	TTTCGTTTCACTCCCCGGGTTGGTATTACACTCGGACCTCGTCGACATGCATTGTCAGGTCGGCAGAATGGGGCTGAATCCTCCTAAGTTTCGAGCTGGACTCAGTGTTATAGGAGTTCCAGCCTCTCGGGTTATACATACCTC
ENST00000333244	ENSG00000185567	AHNAK2	set16	ENSG00000185567	AHNAK2	-46	17687	17715	29	AGCTTTGGTTCCATTTTAGGAGGGCTGTG	0.982151	-53.3785	0.482759	1	1	1	0	1	1	4	1	1	0	11	1	A11	TTTCGTTTCACTCCCCGGGTTGGTA	12	1	A12	TTATAGGAGTTCCAGCCTCTCGGGT	TTTCGTTTCACTCCCCGGGTTGGTATTACACTCGGACCTCGTCGACATGCATTAGCTTTGGTTCCATTTTAGGAGGGCTGTGCCTCCTAAGTTTCGAGCTGGACTCAGTGTTATAGGAGTTCCAGCCTCTCGGGT	TTTCGTTTCACTCCCCGGGTTGGTATTACACTCGGACCTCGTCGACATGCATTAGCTTTGGTTCCATTTTAGGAGGGCTGTGCCTCCTAAGTTTCGAGCTGGACTCAGTGTTATAGGAGTTCCAGCCTCTCGGGTTCTAGCCGA
ENST00000333244	ENSG00000185567	AHNAK2	set16	ENSG00000185567	AHNAK2	-46	17598	17624	27	ATGTAATGTGCTGTGGGATGGGGTGCT	0.962151	-52.8785	0.518519	1	1	1	0	1	1	4	1	1	0	11	1	A11	TTTCGTTTCACTCCCCGGGTTGGTA	12	1	A12	TTATAGGAGTTCCAGCCTCTCGGGT	TTTCGTTTCACTCCCCGGGTTGGTATTACACTCGGACCTCGTCGACATGCATTATGTAATGTGCTGTGGGATGGGGTGCTCCTCCTAAGTTTCGAGCTGGACTCAGTGTTATAGGAGTTCCAGCCTCTCGGGT	TTTCGTTTCACTCCCCGGGTTGGTATTACACTCGGACCTCGTCGACATGCATTATGTAATGTGCTGTGGGATGGGGTGCTCCTCCTAAGTTTCGAGCTGGACTCAGTGTTATAGGAGTTCCAGCCTCTCGGGTTCACGGTTCTG
ENST00000333244	ENSG00000185567	AHNAK2	set16	ENSG00000185567	AHNAK2	-46	17563	17596	34	CATATGTGTGTGTAGCCTTTACTTTCCAACTTAG	0.932151	-55.1785	0.382353	1	1	1	0	1	1	4	1	1	0	11	1	A11	TTTCGTTTCACTCCCCGGGTTGGTA	12	1	A12	TTATAGGAGTTCCAGCCTCTCGGGT	TTTCGTTTCACTCCCCGGGTTGGTATTACACTCGGACCTCGTCGACATGCATTCATATGTGTGTGTAGCCTTTACTTTCCAACTTAGCCTCCTAAGTTTCGAGCTGGACTCAGTGTTATAGGAGTTCCAGCCTCTCGGGT	TTTCGTTTCACTCCCCGGGTTGGTATTACACTCGGACCTCGTCGACATGCATTCATATGTGTGTGTAGCCTTTACTTTCCAACTTAGCCTCCTAAGTTTCGAGCTGGACTCAGTGTTATAGGAGTTCCAGCCTCTCGGGTCGAG
ENST00000333244	ENSG00000185567	AHNAK2	set16	ENSG00000185567	AHNAK2	-46	17530	17561	32	TTTTTGCATCTCTCTTGTACTGATGAGCCATA	0.977849	-54.2785	0.375	1	1	1	0	1	1	4	1	1	0	11	1	A11	TTTCGTTTCACTCCCCGGGTTGGTA	12	1	A12	TTATAGGAGTTCCAGCCTCTCGGGT	TTTCGTTTCACTCCCCGGGTTGGTATTACACTCGGACCTCGTCGACATGCATTTTTTTGCATCTCTCTTGTACTGATGAGCCATACCTCCTAAGTTTCGAGCTGGACTCAGTGTTATAGGAGTTCCAGCCTCTCGGGT	TTTCGTTTCACTCCCCGGGTTGGTATTACACTCGGACCTCGTCGACATGCATTTTTTTGCATCTCTCTTGTACTGATGAGCCATACCTCCTAAGTTTCGAGCTGGACTCAGTGTTATAGGAGTTCCAGCCTCTCGGGTGAGGGT
ENST00000333244	ENSG00000185567	AHNAK2	set16	ENSG00000185567	AHNAK2	-46	17503	17528	26	CTCTCAGCCTTCATTTGGTCCCAGGC	0.927849	-52.0785	0.576923	1	1	1	0	1	1	4	1	1	0	11	1	A11	TTTCGTTTCACTCCCCGGGTTGGTA	12	1	A12	TTATAGGAGTTCCAGCCTCTCGGGT	TTTCGTTTCACTCCCCGGGTTGGTATTACACTCGGACCTCGTCGACATGCATTCTCTCAGCCTTCATTTGGTCCCAGGCCCTCCTAAGTTTCGAGCTGGACTCAGTGTTATAGGAGTTCCAGCCTCTCGGGT	TTTCGTTTCACTCCCCGGGTTGGTATTACACTCGGACCTCGTCGACATGCATTCTCTCAGCCTTCATTTGGTCCCAGGCCCTCCTAAGTTTCGAGCTGGACTCAGTGTTATAGGAGTTCCAGCCTCTCGGGTACCGCGAGTATT
ENST00000333244	ENSG00000185567	AHNAK2	set16	ENSG00000185567	AHNAK2	-46	16849	16878	30	CGCTGGAAGAGATCATCTCAAATGGTTCTC	0.967849	-53.8785	0.466667	1	1	1	1	1	1	5	1	1	0	11	1	A11	TTTCGTTTCACTCCCCGGGTTGGTA	12	1	A12	TTATAGGAGTTCCAGCCTCTCGGGT	TTTCGTTTCACTCCCCGGGTTGGTATTACACTCGGACCTCGTCGACATGCATTCGCTGGAAGAGATCATCTCAAATGGTTCTCCCTCCTAAGTTTCGAGCTGGACTCAGTGTTATAGGAGTTCCAGCCTCTCGGGT	TTTCGTTTCACTCCCCGGGTTGGTATTACACTCGGACCTCGTCGACATGCATTCGCTGGAAGAGATCATCTCAAATGGTTCTCCCTCCTAAGTTTCGAGCTGGACTCAGTGTTATAGGAGTTCCAGCCTCTCGGGTAACGCTAA
ENST00000333244	ENSG00000185567	AHNAK2	set16	ENSG00000185567	AHNAK2	-46	16546	16576	31	TGTATAGTGACCTCTTGACTTTCAACCTGAG	0.957849	-53.8785	0.419355	1	1	1	1	1	1	5	1	1	0	11	1	A11	TTTCGTTTCACTCCCCGGGTTGGTA	12	1	A12	TTATAGGAGTTCCAGCCTCTCGGGT	TTTCGTTTCACTCCCCGGGTTGGTATTACACTCGGACCTCGTCGACATGCATTTGTATAGTGACCTCTTGACTTTCAACCTGAGCCTCCTAAGTTTCGAGCTGGACTCAGTGTTATAGGAGTTCCAGCCTCTCGGGT	TTTCGTTTCACTCCCCGGGTTGGTATTACACTCGGACCTCGTCGACATGCATTTGTATAGTGACCTCTTGACTTTCAACCTGAGCCTCCTAAGTTTCGAGCTGGACTCAGTGTTATAGGAGTTCCAGCCTCTCGGGTGCCCCCC
ENST00000333244	ENSG00000185567	AHNAK2	set16	ENSG00000185567	AHNAK2	-46	16485	16511	27	GGGAGCTTCCAAAGGCAGGTTAAGGTC	0.982151	-53.1785	0.555556	1	1	1	1	1	1	5	1	1	0	11	1	A11	TTTCGTTTCACTCCCCGGGTTGGTA	12	1	A12	TTATAGGAGTTCCAGCCTCTCGGGT	TTTCGTTTCACTCCCCGGGTTGGTATTACACTCGGACCTCGTCGACATGCATTGGGAGCTTCCAAAGGCAGGTTAAGGTCCCTCCTAAGTTTCGAGCTGGACTCAGTGTTATAGGAGTTCCAGCCTCTCGGGT	TTTCGTTTCACTCCCCGGGTTGGTATTACACTCGGACCTCGTCGACATGCATTGGGAGCTTCCAAAGGCAGGTTAAGGTCCCTCCTAAGTTTCGAGCTGGACTCAGTGTTATAGGAGTTCCAGCCTCTCGGGTGGCTATGAGAA
ENST00000333244	ENSG00000185567	AHNAK2	set16	ENSG00000185567	AHNAK2	-46	17363	17391	29	CGATCAGTTCACCCTCTTCCTTCTCTTCA	0.957849	-53.5785	0.482759	1	1	1	0	1	1	4	1	1	0	11	1	A11	TTTCGTTTCACTCCCCGGGTTGGTA	12	1	A12	TTATAGGAGTTCCAGCCTCTCGGGT	TTTCGTTTCACTCCCCGGGTTGGTATTACACTCGGACCTCGTCGACATGCATTCGATCAGTTCACCCTCTTCCTTCTCTTCACCTCCTAAGTTTCGAGCTGGACTCAGTGTTATAGGAGTTCCAGCCTCTCGGGT	TTTCGTTTCACTCCCCGGGTTGGTATTACACTCGGACCTCGTCGACATGCATTCGATCAGTTCACCCTCTTCCTTCTCTTCACCTCCTAAGTTTCGAGCTGGACTCAGTGTTATAGGAGTTCCAGCCTCTCGGGTGAACGGGTA
ENST00000333244	ENSG00000185567	AHNAK2	set16	ENSG00000185567	AHNAK2	-46	3767	3791	25	AGCGGAAGGGGGCTGAATGCTGAGG	0.922151	-53.2785	0.64	1	1	1	1	1	1	5	1	1	0	11	1	A11	TTTCGTTTCACTCCCCGGGTTGGTA	12	1	A12	TTATAGGAGTTCCAGCCTCTCGGGT	TTTCGTTTCACTCCCCGGGTTGGTATTACACTCGGACCTCGTCGACATGCATTAGCGGAAGGGGGCTGAATGCTGAGGCCTCCTAAGTTTCGAGCTGGACTCAGTGTTATAGGAGTTCCAGCCTCTCGGGT	TTTCGTTTCACTCCCCGGGTTGGTATTACACTCGGACCTCGTCGACATGCATTAGCGGAAGGGGGCTGAATGCTGAGGCCTCCTAAGTTTCGAGCTGGACTCAGTGTTATAGGAGTTCCAGCCTCTCGGGTGTTCAACAAAGCT
ENST00000333244	ENSG00000185567	AHNAK2	set16	ENSG00000185567	AHNAK2	-46	3688	3714	27	CTTTGGGTGCAGACACATCCACCGAGG	0.872151	-53.9785	0.592593	1	1	1	1	1	1	5	1	1	0	11	1	A11	TTTCGTTTCACTCCCCGGGTTGGTA	12	1	A12	TTATAGGAGTTCCAGCCTCTCGGGT	TTTCGTTTCACTCCCCGGGTTGGTATTACACTCGGACCTCGTCGACATGCATTCTTTGGGTGCAGACACATCCACCGAGGCCTCCTAAGTTTCGAGCTGGACTCAGTGTTATAGGAGTTCCAGCCTCTCGGGT	TTTCGTTTCACTCCCCGGGTTGGTATTACACTCGGACCTCGTCGACATGCATTCTTTGGGTGCAGACACATCCACCGAGGCCTCCTAAGTTTCGAGCTGGACTCAGTGTTATAGGAGTTCCAGCCTCTCGGGTAAAGTTCTTAG
ENST00000333244	ENSG00000185567	AHNAK2	set16	ENSG00000185567	AHNAK2	-46	15849	15875	27	CATAGCTGCCTCCACGTTTGACCCAGA	0.962151	-53.3785	0.555556	1	1	1	1	1	1	5	1	1	0	11	1	A11	TTTCGTTTCACTCCCCGGGTTGGTA	12	1	A12	TTATAGGAGTTCCAGCCTCTCGGGT	TTTCGTTTCACTCCCCGGGTTGGTATTACACTCGGACCTCGTCGACATGCATTCATAGCTGCCTCCACGTTTGACCCAGACCTCCTAAGTTTCGAGCTGGACTCAGTGTTATAGGAGTTCCAGCCTCTCGGGT	TTTCGTTTCACTCCCCGGGTTGGTATTACACTCGGACCTCGTCGACATGCATTCATAGCTGCCTCCACGTTTGACCCAGACCTCCTAAGTTTCGAGCTGGACTCAGTGTTATAGGAGTTCCAGCCTCTCGGGTCCCTCTTATAA
ENST00000333244	ENSG00000185567	AHNAK2	set16	ENSG00000185567	AHNAK2	-46	17998	18027	30	GCTAAGTGAGTAGGAAACAGTGTTTCCTGG	0.987849	-53.7785	0.466667	1	1	1	1	1	1	5	1	1	0	11	1	A11	TTTCGTTTCACTCCCCGGGTTGGTA	12	1	A12	TTATAGGAGTTCCAGCCTCTCGGGT	TTTCGTTTCACTCCCCGGGTTGGTATTACACTCGGACCTCGTCGACATGCATTGCTAAGTGAGTAGGAAACAGTGTTTCCTGGCCTCCTAAGTTTCGAGCTGGACTCAGTGTTATAGGAGTTCCAGCCTCTCGGGT	TTTCGTTTCACTCCCCGGGTTGGTATTACACTCGGACCTCGTCGACATGCATTGCTAAGTGAGTAGGAAACAGTGTTTCCTGGCCTCCTAAGTTTCGAGCTGGACTCAGTGTTATAGGAGTTCCAGCCTCTCGGGTCTATACTA
ENST00000333244	ENSG00000185567	AHNAK2	set16	ENSG00000185567	AHNAK2	-46	17939	17964	26	ATGTTTGCCGGGAAGCAGCAGCAGCA	0.922151	-53.4785	0.576923	1	1	1	1	1	1	5	1	1	0	11	1	A11	TTTCGTTTCACTCCCCGGGTTGGTA	12	1	A12	TTATAGGAGTTCCAGCCTCTCGGGT	TTTCGTTTCACTCCCCGGGTTGGTATTACACTCGGACCTCGTCGACATGCATTATGTTTGCCGGGAAGCAGCAGCAGCACCTCCTAAGTTTCGAGCTGGACTCAGTGTTATAGGAGTTCCAGCCTCTCGGGT	TTTCGTTTCACTCCCCGGGTTGGTATTACACTCGGACCTCGTCGACATGCATTATGTTTGCCGGGAAGCAGCAGCAGCACCTCCTAAGTTTCGAGCTGGACTCAGTGTTATAGGAGTTCCAGCCTCTCGGGTAATATTGGGTAT
ENST00000333244	ENSG00000185567	AHNAK2	set16	ENSG00000185567	AHNAK2	-46	17717	17743	27	TGCATCCAAAGCTTTGAGGGAGCTGGG	0.912151	-53.7785	0.555556	1	1	1	1	1	1	5	1	1	0	11	1	A11	TTTCGTTTCACTCCCCGGGTTGGTA	12	1	A12	TTATAGGAGTTCCAGCCTCTCGGGT	TTTCGTTTCACTCCCCGGGTTGGTATTACACTCGGACCTCGTCGACATGCATTTGCATCCAAAGCTTTGAGGGAGCTGGGCCTCCTAAGTTTCGAGCTGGACTCAGTGTTATAGGAGTTCCAGCCTCTCGGGT	TTTCGTTTCACTCCCCGGGTTGGTATTACACTCGGACCTCGTCGACATGCATTTGCATCCAAAGCTTTGAGGGAGCTGGGCCTCCTAAGTTTCGAGCTGGACTCAGTGTTATAGGAGTTCCAGCCTCTCGGGTCACTTGCATAC
ENST00000333244	ENSG00000185567	AHNAK2	set16	ENSG00000185567	AHNAK2	-46	17118	17148	31	TCTGGACGTCATTTTTGGAATCAACACCTGT	0.942151	-54.2785	0.419355	1	1	1	1	1	1	5	1	1	0	11	1	A11	TTTCGTTTCACTCCCCGGGTTGGTA	12	1	A12	TTATAGGAGTTCCAGCCTCTCGGGT	TTTCGTTTCACTCCCCGGGTTGGTATTACACTCGGACCTCGTCGACATGCATTTCTGGACGTCATTTTTGGAATCAACACCTGTCCTCCTAAGTTTCGAGCTGGACTCAGTGTTATAGGAGTTCCAGCCTCTCGGGT	TTTCGTTTCACTCCCCGGGTTGGTATTACACTCGGACCTCGTCGACATGCATTTCTGGACGTCATTTTTGGAATCAACACCTGTCCTCCTAAGTTTCGAGCTGGACTCAGTGTTATAGGAGTTCCAGCCTCTCGGGTGCTTTAA
ENST00000333244	ENSG00000185567	AHNAK2	set16	ENSG00000185567	AHNAK2	-46	16912	16937	26	TGCAAGCTGGTGGCCAGAAGGAACTT	0.917849	-51.8785	0.538462	1	1	1	1	1	1	5	1	1	0	11	1	A11	TTTCGTTTCACTCCCCGGGTTGGTA	12	1	A12	TTATAGGAGTTCCAGCCTCTCGGGT	TTTCGTTTCACTCCCCGGGTTGGTATTACACTCGGACCTCGTCGACATGCATTTGCAAGCTGGTGGCCAGAAGGAACTTCCTCCTAAGTTTCGAGCTGGACTCAGTGTTATAGGAGTTCCAGCCTCTCGGGT	TTTCGTTTCACTCCCCGGGTTGGTATTACACTCGGACCTCGTCGACATGCATTTGCAAGCTGGTGGCCAGAAGGAACTTCCTCCTAAGTTTCGAGCTGGACTCAGTGTTATAGGAGTTCCAGCCTCTCGGGTGAAAAATACAGG
ENST00000333244	ENSG00000185567	AHNAK2	set16	ENSG00000185567	AHNAK2	-46	16880	16910	31	AAATGTGAGTGTTTGCTGTCCCAGTACATTG	0.987849	-53.4785	0.419355	1	1	1	1	1	1	5	1	1	0	11	1	A11	TTTCGTTTCACTCCCCGGGTTGGTA	12	1	A12	TTATAGGAGTTCCAGCCTCTCGGGT	TTTCGTTTCACTCCCCGGGTTGGTATTACACTCGGACCTCGTCGACATGCATTAAATGTGAGTGTTTGCTGTCCCAGTACATTGCCTCCTAAGTTTCGAGCTGGACTCAGTGTTATAGGAGTTCCAGCCTCTCGGGT	TTTCGTTTCACTCCCCGGGTTGGTATTACACTCGGACCTCGTCGACATGCATTAAATGTGAGTGTTTGCTGTCCCAGTACATTGCCTCCTAAGTTTCGAGCTGGACTCAGTGTTATAGGAGTTCCAGCCTCTCGGGTATCTTCT
ENST00000333244	ENSG00000185567	AHNAK2	set16	ENSG00000185567	AHNAK2	-46	14091	14123	33	AGTCTTCTCATGGAATGTAACATTTCCTTCGAT	0.987849	-54.4785	0.363636	1	1	1	1	1	1	5	1	1	0	11	1	A11	TTTCGTTTCACTCCCCGGGTTGGTA	12	1	A12	TTATAGGAGTTCCAGCCTCTCGGGT	TTTCGTTTCACTCCCCGGGTTGGTATTACACTCGGACCTCGTCGACATGCATTAGTCTTCTCATGGAATGTAACATTTCCTTCGATCCTCCTAAGTTTCGAGCTGGACTCAGTGTTATAGGAGTTCCAGCCTCTCGGGT	TTTCGTTTCACTCCCCGGGTTGGTATTACACTCGGACCTCGTCGACATGCATTAGTCTTCTCATGGAATGTAACATTTCCTTCGATCCTCCTAAGTTTCGAGCTGGACTCAGTGTTATAGGAGTTCCAGCCTCTCGGGTGCTTG
ENST00000333244	ENSG00000185567	AHNAK2	set16	ENSG00000185567	AHNAK2	-46	13996	14026	31	CCTTGAAACTTACTGTCTTTCCCAGCTACAT	0.947849	-53.4785	0.419355	1	1	1	1	1	1	5	1	1	0	11	1	A11	TTTCGTTTCACTCCCCGGGTTGGTA	12	1	A12	TTATAGGAGTTCCAGCCTCTCGGGT	TTTCGTTTCACTCCCCGGGTTGGTATTACACTCGGACCTCGTCGACATGCATTCCTTGAAACTTACTGTCTTTCCCAGCTACATCCTCCTAAGTTTCGAGCTGGACTCAGTGTTATAGGAGTTCCAGCCTCTCGGGT	TTTCGTTTCACTCCCCGGGTTGGTATTACACTCGGACCTCGTCGACATGCATTCCTTGAAACTTACTGTCTTTCCCAGCTACATCCTCCTAAGTTTCGAGCTGGACTCAGTGTTATAGGAGTTCCAGCCTCTCGGGTCAGAGGG
ENST00000333244	ENSG00000185567	AHNAK2	set16	ENSG00000185567	AHNAK2	-46	13946	13970	25	CTCAAGCCGCGCACCATCCAGCATG	0.937849	-51.7785	0.64	1	1	1	1	1	1	5	1	1	0	11	1	A11	TTTCGTTTCACTCCCCGGGTTGGTA	12	1	A12	TTATAGGAGTTCCAGCCTCTCGGGT	TTTCGTTTCACTCCCCGGGTTGGTATTACACTCGGACCTCGTCGACATGCATTCTCAAGCCGCGCACCATCCAGCATGCCTCCTAAGTTTCGAGCTGGACTCAGTGTTATAGGAGTTCCAGCCTCTCGGGT	TTTCGTTTCACTCCCCGGGTTGGTATTACACTCGGACCTCGTCGACATGCATTCTCAAGCCGCGCACCATCCAGCATGCCTCCTAAGTTTCGAGCTGGACTCAGTGTTATAGGAGTTCCAGCCTCTCGGGTGCTCTCACTAGTT
ENST00000333244	ENSG00000185567	AHNAK2	set16	ENSG00000185567	AHNAK2	-46	3893	3922	30	TTGAGGTCCACTTTGGGCATCTTCAAACTA	0.972151	-53.8785	0.433333	1	1	1	1	1	1	5	1	1	0	11	1	A11	TTTCGTTTCACTCCCCGGGTTGGTA	12	1	A12	TTATAGGAGTTCCAGCCTCTCGGGT	TTTCGTTTCACTCCCCGGGTTGGTATTACACTCGGACCTCGTCGACATGCATTTTGAGGTCCACTTTGGGCATCTTCAAACTACCTCCTAAGTTTCGAGCTGGACTCAGTGTTATAGGAGTTCCAGCCTCTCGGGT	TTTCGTTTCACTCCCCGGGTTGGTATTACACTCGGACCTCGTCGACATGCATTTTGAGGTCCACTTTGGGCATCTTCAAACTACCTCCTAAGTTTCGAGCTGGACTCAGTGTTATAGGAGTTCCAGCCTCTCGGGTTTGTACAC
ENST00000333244	ENSG00000185567	AHNAK2	set16	ENSG00000185567	AHNAK2	-46	13278	13303	26	AAACTGGGCATCTGCAGCTTCGGCAG	0.947849	-52.2785	0.576923	1	1	1	1	1	1	5	1	1	0	11	1	A11	TTTCGTTTCACTCCCCGGGTTGGTA	12	1	A12	TTATAGGAGTTCCAGCCTCTCGGGT	TTTCGTTTCACTCCCCGGGTTGGTATTACACTCGGACCTCGTCGACATGCATTAAACTGGGCATCTGCAGCTTCGGCAGCCTCCTAAGTTTCGAGCTGGACTCAGTGTTATAGGAGTTCCAGCCTCTCGGGT	TTTCGTTTCACTCCCCGGGTTGGTATTACACTCGGACCTCGTCGACATGCATTAAACTGGGCATCTGCAGCTTCGGCAGCCTCCTAAGTTTCGAGCTGGACTCAGTGTTATAGGAGTTCCAGCCTCTCGGGTAGGAAATGTATT
ENST00000333244	ENSG00000185567	AHNAK2	set16	ENSG00000185567	AHNAK2	-46	13176	13201	26	AGATCAGCGGAAGGGGGCTGAATGCT	0.932151	-53.5785	0.576923	1	1	1	1	1	1	5	1	1	0	11	1	A11	TTTCGTTTCACTCCCCGGGTTGGTA	12	1	A12	TTATAGGAGTTCCAGCCTCTCGGGT	TTTCGTTTCACTCCCCGGGTTGGTATTACACTCGGACCTCGTCGACATGCATTAGATCAGCGGAAGGGGGCTGAATGCTCCTCCTAAGTTTCGAGCTGGACTCAGTGTTATAGGAGTTCCAGCCTCTCGGGT	TTTCGTTTCACTCCCCGGGTTGGTATTACACTCGGACCTCGTCGACATGCATTAGATCAGCGGAAGGGGGCTGAATGCTCCTCCTAAGTTTCGAGCTGGACTCAGTGTTATAGGAGTTCCAGCCTCTCGGGTGTAGCCTCTGCT
ENST00000333244	ENSG00000185567	AHNAK2	set16	ENSG00000185567	AHNAK2	-46	12602	12628	27	TTCGCCTTCAGCTCAGACACATCCACG	0.977849	-53.0785	0.555556	1	1	1	1	1	1	5	1	1	0	11	1	A11	TTTCGTTTCACTCCCCGGGTTGGTA	12	1	A12	TTATAGGAGTTCCAGCCTCTCGGGT	TTTCGTTTCACTCCCCGGGTTGGTATTACACTCGGACCTCGTCGACATGCATTTTCGCCTTCAGCTCAGACACATCCACGCCTCCTAAGTTTCGAGCTGGACTCAGTGTTATAGGAGTTCCAGCCTCTCGGGT	TTTCGTTTCACTCCCCGGGTTGGTATTACACTCGGACCTCGTCGACATGCATTTTCGCCTTCAGCTCAGACACATCCACGCCTCCTAAGTTTCGAGCTGGACTCAGTGTTATAGGAGTTCCAGCCTCTCGGGTGGCGCTCAAGT
ENST00000333244	ENSG00000185567	AHNAK2	set16	ENSG00000185567	AHNAK2	-46	15817	15847	31	ACAAGGAACTCTTTGACTTTAGCTGCTGCTT	0.972151	-54.6785	0.419355	1	1	1	1	1	1	5	1	1	0	11	1	A11	TTTCGTTTCACTCCCCGGGTTGGTA	12	1	A12	TTATAGGAGTTCCAGCCTCTCGGGT	TTTCGTTTCACTCCCCGGGTTGGTATTACACTCGGACCTCGTCGACATGCATTACAAGGAACTCTTTGACTTTAGCTGCTGCTTCCTCCTAAGTTTCGAGCTGGACTCAGTGTTATAGGAGTTCCAGCCTCTCGGGT	TTTCGTTTCACTCCCCGGGTTGGTATTACACTCGGACCTCGTCGACATGCATTACAAGGAACTCTTTGACTTTAGCTGCTGCTTCCTCCTAAGTTTCGAGCTGGACTCAGTGTTATAGGAGTTCCAGCCTCTCGGGTACATTGT
ENST00000333244	ENSG00000185567	AHNAK2	set16	ENSG00000185567	AHNAK2	-46	15215	15245	31	ACTCTTAGAAGCCTTCATTTTGGGAAGTGCA	0.932151	-54.7785	0.419355	1	1	1	1	1	1	5	1	1	0	11	1	A11	TTTCGTTTCACTCCCCGGGTTGGTA	12	1	A12	TTATAGGAGTTCCAGCCTCTCGGGT	TTTCGTTTCACTCCCCGGGTTGGTATTACACTCGGACCTCGTCGACATGCATTACTCTTAGAAGCCTTCATTTTGGGAAGTGCACCTCCTAAGTTTCGAGCTGGACTCAGTGTTATAGGAGTTCCAGCCTCTCGGGT	TTTCGTTTCACTCCCCGGGTTGGTATTACACTCGGACCTCGTCGACATGCATTACTCTTAGAAGCCTTCATTTTGGGAAGTGCACCTCCTAAGTTTCGAGCTGGACTCAGTGTTATAGGAGTTCCAGCCTCTCGGGTCACCAGG
ENST00000333244	ENSG00000185567	AHNAK2	set16	ENSG00000185567	AHNAK2	-46	2688	2713	26	GACACATCCACCGAGTCCTCCATGGA	0.972151	-53.0785	0.576923	1	1	1	1	1	1	5	1	1	0	11	1	A11	TTTCGTTTCACTCCCCGGGTTGGTA	12	1	A12	TTATAGGAGTTCCAGCCTCTCGGGT	TTTCGTTTCACTCCCCGGGTTGGTATTACACTCGGACCTCGTCGACATGCATTGACACATCCACCGAGTCCTCCATGGACCTCCTAAGTTTCGAGCTGGACTCAGTGTTATAGGAGTTCCAGCCTCTCGGGT	TTTCGTTTCACTCCCCGGGTTGGTATTACACTCGGACCTCGTCGACATGCATTGACACATCCACCGAGTCCTCCATGGACCTCCTAAGTTTCGAGCTGGACTCAGTGTTATAGGAGTTCCAGCCTCTCGGGTCTGTTCTTCATT
ENST00000333244	ENSG00000185567	AHNAK2	set16	ENSG00000185567	AHNAK2	-46	14907	14932	26	GATGTCTGCAAGGAGGCCACAAGCTC	0.957849	-52.6785	0.576923	1	1	1	1	1	1	5	1	1	0	11	1	A11	TTTCGTTTCACTCCCCGGGTTGGTA	12	1	A12	TTATAGGAGTTCCAGCCTCTCGGGT	TTTCGTTTCACTCCCCGGGTTGGTATTACACTCGGACCTCGTCGACATGCATTGATGTCTGCAAGGAGGCCACAAGCTCCCTCCTAAGTTTCGAGCTGGACTCAGTGTTATAGGAGTTCCAGCCTCTCGGGT	TTTCGTTTCACTCCCCGGGTTGGTATTACACTCGGACCTCGTCGACATGCATTGATGTCTGCAAGGAGGCCACAAGCTCCCTCCTAAGTTTCGAGCTGGACTCAGTGTTATAGGAGTTCCAGCCTCTCGGGTTCGTTTTTTTAT
ENST00000333244	ENSG00000185567	AHNAK2	set16	ENSG00000185567	AHNAK2	-46	14648	14676	29	CAGAGTGACTCTCAGCTTGAGATGTTGGA	0.992151	-54.2785	0.482759	1	1	1	1	1	1	5	1	1	0	11	1	A11	TTTCGTTTCACTCCCCGGGTTGGTA	12	1	A12	TTATAGGAGTTCCAGCCTCTCGGGT	TTTCGTTTCACTCCCCGGGTTGGTATTACACTCGGACCTCGTCGACATGCATTCAGAGTGACTCTCAGCTTGAGATGTTGGACCTCCTAAGTTTCGAGCTGGACTCAGTGTTATAGGAGTTCCAGCCTCTCGGGT	TTTCGTTTCACTCCCCGGGTTGGTATTACACTCGGACCTCGTCGACATGCATTCAGAGTGACTCTCAGCTTGAGATGTTGGACCTCCTAAGTTTCGAGCTGGACTCAGTGTTATAGGAGTTCCAGCCTCTCGGGTATCCCTGGA
ENST00000333244	ENSG00000185567	AHNAK2	set16	ENSG00000185567	AHNAK2	-46	14509	14539	31	CTGGGAACAGTCACCTGGTATTTTGTAAGTG	0.942151	-54.1785	0.451613	1	1	1	1	1	1	5	1	1	0	11	1	A11	TTTCGTTTCACTCCCCGGGTTGGTA	12	1	A12	TTATAGGAGTTCCAGCCTCTCGGGT	TTTCGTTTCACTCCCCGGGTTGGTATTACACTCGGACCTCGTCGACATGCATTCTGGGAACAGTCACCTGGTATTTTGTAAGTGCCTCCTAAGTTTCGAGCTGGACTCAGTGTTATAGGAGTTCCAGCCTCTCGGGT	TTTCGTTTCACTCCCCGGGTTGGTATTACACTCGGACCTCGTCGACATGCATTCTGGGAACAGTCACCTGGTATTTTGTAAGTGCCTCCTAAGTTTCGAGCTGGACTCAGTGTTATAGGAGTTCCAGCCTCTCGGGTCGCCCTG
ENST00000333244	ENSG00000185567	AHNAK2	set16	ENSG00000185567	AHNAK2	-46	16106	16135	30	GGCTTGGAAAGAGGAGTCTCATCTATTTCT	0.907849	-53.3785	0.433333	1	1	1	1	1	1	5	1	1	0	11	1	A11	TTTCGTTTCACTCCCCGGGTTGGTA	12	1	A12	TTATAGGAGTTCCAGCCTCTCGGGT	TTTCGTTTCACTCCCCGGGTTGGTATTACACTCGGACCTCGTCGACATGCATTGGCTTGGAAAGAGGAGTCTCATCTATTTCTCCTCCTAAGTTTCGAGCTGGACTCAGTGTTATAGGAGTTCCAGCCTCTCGGGT	TTTCGTTTCACTCCCCGGGTTGGTATTACACTCGGACCTCGTCGACATGCATTGGCTTGGAAAGAGGAGTCTCATCTATTTCTCCTCCTAAGTTTCGAGCTGGACTCAGTGTTATAGGAGTTCCAGCCTCTCGGGTTCTTCTAG
ENST00000333244	ENSG00000185567	AHNAK2	set16	ENSG00000185567	AHNAK2	-46	16078	16104	27	CTGGAAGAACCTGGGTTTCTGGAAGCC	0.987849	-52.7785	0.555556	1	1	1	1	1	1	5	1	1	0	11	1	A11	TTTCGTTTCACTCCCCGGGTTGGTA	12	1	A12	TTATAGGAGTTCCAGCCTCTCGGGT	TTTCGTTTCACTCCCCGGGTTGGTATTACACTCGGACCTCGTCGACATGCATTCTGGAAGAACCTGGGTTTCTGGAAGCCCCTCCTAAGTTTCGAGCTGGACTCAGTGTTATAGGAGTTCCAGCCTCTCGGGT	TTTCGTTTCACTCCCCGGGTTGGTATTACACTCGGACCTCGTCGACATGCATTCTGGAAGAACCTGGGTTTCTGGAAGCCCCTCCTAAGTTTCGAGCTGGACTCAGTGTTATAGGAGTTCCAGCCTCTCGGGTGCATTCCTCTT
ENST00000333244	ENSG00000185567	AHNAK2	set16	ENSG00000185567	AHNAK2	-46	15133	15158	26	AGGAGGCAGATCCATGTGGATGGCAG	0.962151	-53.0785	0.576923	1	1	1	1	1	1	5	1	1	0	11	1	A11	TTTCGTTTCACTCCCCGGGTTGGTA	12	1	A12	TTATAGGAGTTCCAGCCTCTCGGGT	TTTCGTTTCACTCCCCGGGTTGGTATTACACTCGGACCTCGTCGACATGCATTAGGAGGCAGATCCATGTGGATGGCAGCCTCCTAAGTTTCGAGCTGGACTCAGTGTTATAGGAGTTCCAGCCTCTCGGGT	TTTCGTTTCACTCCCCGGGTTGGTATTACACTCGGACCTCGTCGACATGCATTAGGAGGCAGATCCATGTGGATGGCAGCCTCCTAAGTTTCGAGCTGGACTCAGTGTTATAGGAGTTCCAGCCTCTCGGGTTCACAATACGAC
ENST00000333244	ENSG00000185567	AHNAK2	set16	ENSG00000185567	AHNAK2	-46	13663	13687	25	GAAGGGGCCTGAATGCGGAGGTCAG	0.992151	-52.5785	0.64	1	1	1	1	1	1	5	1	1	0	11	1	A11	TTTCGTTTCACTCCCCGGGTTGGTA	12	1	A12	TTATAGGAGTTCCAGCCTCTCGGGT	TTTCGTTTCACTCCCCGGGTTGGTATTACACTCGGACCTCGTCGACATGCATTGAAGGGGCCTGAATGCGGAGGTCAGCCTCCTAAGTTTCGAGCTGGACTCAGTGTTATAGGAGTTCCAGCCTCTCGGGT	TTTCGTTTCACTCCCCGGGTTGGTATTACACTCGGACCTCGTCGACATGCATTGAAGGGGCCTGAATGCGGAGGTCAGCCTCCTAAGTTTCGAGCTGGACTCAGTGTTATAGGAGTTCCAGCCTCTCGGGTGGAACTTCCGACT
ENST00000333244	ENSG00000185567	AHNAK2	set16	ENSG00000185567	AHNAK2	-46	17745	17771	27	TGTCTTGTGGAAGTCAGGGTGCCTTCT	0.987849	-52.9785	0.518519	1	1	1	0	1	1	4	1	1	0	11	1	A11	TTTCGTTTCACTCCCCGGGTTGGTA	12	1	A12	TTATAGGAGTTCCAGCCTCTCGGGT	TTTCGTTTCACTCCCCGGGTTGGTATTACACTCGGACCTCGTCGACATGCATTTGTCTTGTGGAAGTCAGGGTGCCTTCTCCTCCTAAGTTTCGAGCTGGACTCAGTGTTATAGGAGTTCCAGCCTCTCGGGT	TTTCGTTTCACTCCCCGGGTTGGTATTACACTCGGACCTCGTCGACATGCATTTGTCTTGTGGAAGTCAGGGTGCCTTCTCCTCCTAAGTTTCGAGCTGGACTCAGTGTTATAGGAGTTCCAGCCTCTCGGGTAGTGCCGTGCT
ENST00000333244	ENSG00000185567	AHNAK2	set16	ENSG00000185567	AHNAK2	-46	12092	12118	27	GTCACATCCACTGATGCCTCCATGGAC	0.922151	-53.7785	0.555556	1	1	1	1	1	1	5	1	1	0	11	1	A11	TTTCGTTTCACTCCCCGGGTTGGTA	12	1	A12	TTATAGGAGTTCCAGCCTCTCGGGT	TTTCGTTTCACTCCCCGGGTTGGTATTACACTCGGACCTCGTCGACATGCATTGTCACATCCACTGATGCCTCCATGGACCCTCCTAAGTTTCGAGCTGGACTCAGTGTTATAGGAGTTCCAGCCTCTCGGGT	TTTCGTTTCACTCCCCGGGTTGGTATTACACTCGGACCTCGTCGACATGCATTGTCACATCCACTGATGCCTCCATGGACCCTCCTAAGTTTCGAGCTGGACTCAGTGTTATAGGAGTTCCAGCCTCTCGGGTAGGATTCACGC
ENST00000333244	ENSG00000185567	AHNAK2	set16	ENSG00000185567	AHNAK2	-46	15967	15991	25	GCAGTGGAGAGGTGCAGCTTCAAGC	0.867849	-51.6785	0.6	1	1	1	1	1	1	5	1	1	0	11	1	A11	TTTCGTTTCACTCCCCGGGTTGGTA	12	1	A12	TTATAGGAGTTCCAGCCTCTCGGGT	TTTCGTTTCACTCCCCGGGTTGGTATTACACTCGGACCTCGTCGACATGCATTGCAGTGGAGAGGTGCAGCTTCAAGCCCTCCTAAGTTTCGAGCTGGACTCAGTGTTATAGGAGTTCCAGCCTCTCGGGT	TTTCGTTTCACTCCCCGGGTTGGTATTACACTCGGACCTCGTCGACATGCATTGCAGTGGAGAGGTGCAGCTTCAAGCCCTCCTAAGTTTCGAGCTGGACTCAGTGTTATAGGAGTTCCAGCCTCTCGGGTGGGGAATCTATGC
ENST00000356239	ENSG00000127914	AKAP9	set16	ENSG00000127914	AKAP9	-46	4037	4070	34	TTAGTCGTGTTTGAAGTACCAAGAGTTTGTTGTA	0.962151	-55.0785	0.352941	1	1	1	1	1	1	5	1	1	0	13	1	B1	GTCACCTATGCTGGGTTCGCGTGTA	14	1	B2	AGCAGTTAGATCCACTCCCTGAGGT	GTCACCTATGCTGGGTTCGCGTGTATTACACTCGGACCTCGTCGACATGCATTTTAGTCGTGTTTGAAGTACCAAGAGTTTGTTGTACCTCCTAAGTTTCGAGCTGGACTCAGTGAGCAGTTAGATCCACTCCCTGAGGT	GTCACCTATGCTGGGTTCGCGTGTATTACACTCGGACCTCGTCGACATGCATTTTAGTCGTGTTTGAAGTACCAAGAGTTTGTTGTACCTCCTAAGTTTCGAGCTGGACTCAGTGAGCAGTTAGATCCACTCCCTGAGGTTAAG
ENST00000356239	ENSG00000127914	AKAP9	set16	ENSG00000127914	AKAP9	-46	3013	3045	33	TTTTCAACAACCTCACCCATTTCCAATGTTTCT	0.942151	-54.3785	0.363636	1	1	1	1	1	1	5	1	1	0	13	1	B1	GTCACCTATGCTGGGTTCGCGTGTA	14	1	B2	AGCAGTTAGATCCACTCCCTGAGGT	GTCACCTATGCTGGGTTCGCGTGTATTACACTCGGACCTCGTCGACATGCATTTTTTCAACAACCTCACCCATTTCCAATGTTTCTCCTCCTAAGTTTCGAGCTGGACTCAGTGAGCAGTTAGATCCACTCCCTGAGGT	GTCACCTATGCTGGGTTCGCGTGTATTACACTCGGACCTCGTCGACATGCATTTTTTCAACAACCTCACCCATTTCCAATGTTTCTCCTCCTAAGTTTCGAGCTGGACTCAGTGAGCAGTTAGATCCACTCCCTGAGGTCTCTC
ENST00000356239	ENSG00000127914	AKAP9	set16	ENSG00000127914	AKAP9	-46	5526	5553	28	CTCCAAATTAGGCTGGCAGATGACTGGC	0.922151	-54.0785	0.535714	1	1	1	1	1	1	5	1	1	0	13	1	B1	GTCACCTATGCTGGGTTCGCGTGTA	14	1	B2	AGCAGTTAGATCCACTCCCTGAGGT	GTCACCTATGCTGGGTTCGCGTGTATTACACTCGGACCTCGTCGACATGCATTCTCCAAATTAGGCTGGCAGATGACTGGCCCTCCTAAGTTTCGAGCTGGACTCAGTGAGCAGTTAGATCCACTCCCTGAGGT	GTCACCTATGCTGGGTTCGCGTGTATTACACTCGGACCTCGTCGACATGCATTCTCCAAATTAGGCTGGCAGATGACTGGCCCTCCTAAGTTTCGAGCTGGACTCAGTGAGCAGTTAGATCCACTCCCTGAGGTCAAGGTCTAG
ENST00000356239	ENSG00000127914	AKAP9	set16	ENSG00000127914	AKAP9	-46	9727	9758	32	CCAATTTAGTTTGTGCAAGCTCACTCTTCAGT	0.982151	-54.4785	0.40625	1	1	1	0	1	1	4	1	1	0	13	1	B1	GTCACCTATGCTGGGTTCGCGTGTA	14	1	B2	AGCAGTTAGATCCACTCCCTGAGGT	GTCACCTATGCTGGGTTCGCGTGTATTACACTCGGACCTCGTCGACATGCATTCCAATTTAGTTTGTGCAAGCTCACTCTTCAGTCCTCCTAAGTTTCGAGCTGGACTCAGTGAGCAGTTAGATCCACTCCCTGAGGT	GTCACCTATGCTGGGTTCGCGTGTATTACACTCGGACCTCGTCGACATGCATTCCAATTTAGTTTGTGCAAGCTCACTCTTCAGTCCTCCTAAGTTTCGAGCTGGACTCAGTGAGCAGTTAGATCCACTCCCTGAGGTTGGGTA
ENST00000356239	ENSG00000127914	AKAP9	set16	ENSG00000127914	AKAP9	-46	5257	5283	27	CTGCTGTTGCGCAGCTCACAACACAGC	0.872151	-54.5785	0.592593	1	1	1	1	1	1	5	1	1	0	13	1	B1	GTCACCTATGCTGGGTTCGCGTGTA	14	1	B2	AGCAGTTAGATCCACTCCCTGAGGT	GTCACCTATGCTGGGTTCGCGTGTATTACACTCGGACCTCGTCGACATGCATTCTGCTGTTGCGCAGCTCACAACACAGCCCTCCTAAGTTTCGAGCTGGACTCAGTGAGCAGTTAGATCCACTCCCTGAGGT	GTCACCTATGCTGGGTTCGCGTGTATTACACTCGGACCTCGTCGACATGCATTCTGCTGTTGCGCAGCTCACAACACAGCCCTCCTAAGTTTCGAGCTGGACTCAGTGAGCAGTTAGATCCACTCCCTGAGGTGACTCAATGCC
ENST00000356239	ENSG00000127914	AKAP9	set16	ENSG00000127914	AKAP9	-46	4279	4310	32	CAGTTTCTTTCAACTGTTGCTGCAAAGAGGAT	0.982151	-54.4785	0.40625	1	1	1	1	1	1	5	1	1	0	13	1	B1	GTCACCTATGCTGGGTTCGCGTGTA	14	1	B2	AGCAGTTAGATCCACTCCCTGAGGT	GTCACCTATGCTGGGTTCGCGTGTATTACACTCGGACCTCGTCGACATGCATTCAGTTTCTTTCAACTGTTGCTGCAAAGAGGATCCTCCTAAGTTTCGAGCTGGACTCAGTGAGCAGTTAGATCCACTCCCTGAGGT	GTCACCTATGCTGGGTTCGCGTGTATTACACTCGGACCTCGTCGACATGCATTCAGTTTCTTTCAACTGTTGCTGCAAAGAGGATCCTCCTAAGTTTCGAGCTGGACTCAGTGAGCAGTTAGATCCACTCCCTGAGGTTTTATG
ENST00000356239	ENSG00000127914	AKAP9	set16	ENSG00000127914	AKAP9	-46	4345	4373	29	TGGACTCACTAACAGCTTGAAGCCTCTTC	0.972151	-54.3785	0.482759	1	1	1	1	1	1	5	1	1	0	13	1	B1	GTCACCTATGCTGGGTTCGCGTGTA	14	1	B2	AGCAGTTAGATCCACTCCCTGAGGT	GTCACCTATGCTGGGTTCGCGTGTATTACACTCGGACCTCGTCGACATGCATTTGGACTCACTAACAGCTTGAAGCCTCTTCCCTCCTAAGTTTCGAGCTGGACTCAGTGAGCAGTTAGATCCACTCCCTGAGGT	GTCACCTATGCTGGGTTCGCGTGTATTACACTCGGACCTCGTCGACATGCATTTGGACTCACTAACAGCTTGAAGCCTCTTCCCTCCTAAGTTTCGAGCTGGACTCAGTGAGCAGTTAGATCCACTCCCTGAGGTGTGCGGTTC
ENST00000356239	ENSG00000127914	AKAP9	set16	ENSG00000127914	AKAP9	-46	10096	10127	32	CTAAGTTTCGACCTTGTTCTTCTGACAACTGG	0.962151	-54.7785	0.4375	1	1	1	0	1	1	4	1	1	0	13	1	B1	GTCACCTATGCTGGGTTCGCGTGTA	14	1	B2	AGCAGTTAGATCCACTCCCTGAGGT	GTCACCTATGCTGGGTTCGCGTGTATTACACTCGGACCTCGTCGACATGCATTCTAAGTTTCGACCTTGTTCTTCTGACAACTGGCCTCCTAAGTTTCGAGCTGGACTCAGTGAGCAGTTAGATCCACTCCCTGAGGT	GTCACCTATGCTGGGTTCGCGTGTATTACACTCGGACCTCGTCGACATGCATTCTAAGTTTCGACCTTGTTCTTCTGACAACTGGCCTCCTAAGTTTCGAGCTGGACTCAGTGAGCAGTTAGATCCACTCCCTGAGGTGCCTGC
ENST00000356239	ENSG00000127914	AKAP9	set16	ENSG00000127914	AKAP9	-46	10026	10057	32	GGATTCGTTCAGTAGTTGTTTCTGTTGTTCCA	0.972151	-54.4785	0.40625	1	1	1	0	1	1	4	1	1	0	13	1	B1	GTCACCTATGCTGGGTTCGCGTGTA	14	1	B2	AGCAGTTAGATCCACTCCCTGAGGT	GTCACCTATGCTGGGTTCGCGTGTATTACACTCGGACCTCGTCGACATGCATTGGATTCGTTCAGTAGTTGTTTCTGTTGTTCCACCTCCTAAGTTTCGAGCTGGACTCAGTGAGCAGTTAGATCCACTCCCTGAGGT	GTCACCTATGCTGGGTTCGCGTGTATTACACTCGGACCTCGTCGACATGCATTGGATTCGTTCAGTAGTTGTTTCTGTTGTTCCACCTCCTAAGTTTCGAGCTGGACTCAGTGAGCAGTTAGATCCACTCCCTGAGGTCTGATT
ENST00000356239	ENSG00000127914	AKAP9	set16	ENSG00000127914	AKAP9	-46	5226	5255	30	TCTCTCTTCCAGCTAAAGACAGCTGCTTTA	0.967849	-54.2785	0.433333	1	1	1	1	1	1	5	1	1	0	13	1	B1	GTCACCTATGCTGGGTTCGCGTGTA	14	1	B2	AGCAGTTAGATCCACTCCCTGAGGT	GTCACCTATGCTGGGTTCGCGTGTATTACACTCGGACCTCGTCGACATGCATTTCTCTCTTCCAGCTAAAGACAGCTGCTTTACCTCCTAAGTTTCGAGCTGGACTCAGTGAGCAGTTAGATCCACTCCCTGAGGT	GTCACCTATGCTGGGTTCGCGTGTATTACACTCGGACCTCGTCGACATGCATTTCTCTCTTCCAGCTAAAGACAGCTGCTTTACCTCCTAAGTTTCGAGCTGGACTCAGTGAGCAGTTAGATCCACTCCCTGAGGTGAAGCTGT
ENST00000356239	ENSG00000127914	AKAP9	set16	ENSG00000127914	AKAP9	-46	9793	9823	31	TTCCAACCTGAAAGCCTCCAATTCTTTTAGG	0.967849	-53.3785	0.419355	1	1	1	1	1	0	4	1	1	0	13	1	B1	GTCACCTATGCTGGGTTCGCGTGTA	14	1	B2	AGCAGTTAGATCCACTCCCTGAGGT	GTCACCTATGCTGGGTTCGCGTGTATTACACTCGGACCTCGTCGACATGCATTTTCCAACCTGAAAGCCTCCAATTCTTTTAGGCCTCCTAAGTTTCGAGCTGGACTCAGTGAGCAGTTAGATCCACTCCCTGAGGT	GTCACCTATGCTGGGTTCGCGTGTATTACACTCGGACCTCGTCGACATGCATTTTCCAACCTGAAAGCCTCCAATTCTTTTAGGCCTCCTAAGTTTCGAGCTGGACTCAGTGAGCAGTTAGATCCACTCCCTGAGGTATATGGA
ENST00000356239	ENSG00000127914	AKAP9	set16	ENSG00000127914	AKAP9	-46	9760	9791	32	GTTTATGCTGTGCCTTGAGTGTTGTTTCTAGT	0.942151	-54.8785	0.40625	1	1	1	0	1	1	4	1	1	0	13	1	B1	GTCACCTATGCTGGGTTCGCGTGTA	14	1	B2	AGCAGTTAGATCCACTCCCTGAGGT	GTCACCTATGCTGGGTTCGCGTGTATTACACTCGGACCTCGTCGACATGCATTGTTTATGCTGTGCCTTGAGTGTTGTTTCTAGTCCTCCTAAGTTTCGAGCTGGACTCAGTGAGCAGTTAGATCCACTCCCTGAGGT	GTCACCTATGCTGGGTTCGCGTGTATTACACTCGGACCTCGTCGACATGCATTGTTTATGCTGTGCCTTGAGTGTTGTTTCTAGTCCTCCTAAGTTTCGAGCTGGACTCAGTGAGCAGTTAGATCCACTCCCTGAGGTTACTCT
ENST00000356239	ENSG00000127914	AKAP9	set16	ENSG00000127914	AKAP9	-46	2062	2091	30	TGTGATTCAGCCATTCTGTCTAACACAGCA	0.962151	-54.2785	0.433333	1	1	1	1	1	1	5	1	1	0	13	1	B1	GTCACCTATGCTGGGTTCGCGTGTA	14	1	B2	AGCAGTTAGATCCACTCCCTGAGGT	GTCACCTATGCTGGGTTCGCGTGTATTACACTCGGACCTCGTCGACATGCATTTGTGATTCAGCCATTCTGTCTAACACAGCACCTCCTAAGTTTCGAGCTGGACTCAGTGAGCAGTTAGATCCACTCCCTGAGGT	GTCACCTATGCTGGGTTCGCGTGTATTACACTCGGACCTCGTCGACATGCATTTGTGATTCAGCCATTCTGTCTAACACAGCACCTCCTAAGTTTCGAGCTGGACTCAGTGAGCAGTTAGATCCACTCCCTGAGGTTCTCCGGC
ENST00000356239	ENSG00000127914	AKAP9	set16	ENSG00000127914	AKAP9	-46	9927	9954	28	TTATCCCGTTCTTCACTGCGTCCCAACT	0.967849	-52.8785	0.5	1	1	1	0	1	1	4	1	1	0	13	1	B1	GTCACCTATGCTGGGTTCGCGTGTA	14	1	B2	AGCAGTTAGATCCACTCCCTGAGGT	GTCACCTATGCTGGGTTCGCGTGTATTACACTCGGACCTCGTCGACATGCATTTTATCCCGTTCTTCACTGCGTCCCAACTCCTCCTAAGTTTCGAGCTGGACTCAGTGAGCAGTTAGATCCACTCCCTGAGGT	GTCACCTATGCTGGGTTCGCGTGTATTACACTCGGACCTCGTCGACATGCATTTTATCCCGTTCTTCACTGCGTCCCAACTCCTCCTAAGTTTCGAGCTGGACTCAGTGAGCAGTTAGATCCACTCCCTGAGGTAAACACTGAA
ENST00000356239	ENSG00000127914	AKAP9	set16	ENSG00000127914	AKAP9	-46	9669	9695	27	GCTCCTGCAGTTCCGTTGCTCTGTCTT	0.972151	-53.7785	0.555556	1	1	1	0	1	1	4	1	1	0	13	1	B1	GTCACCTATGCTGGGTTCGCGTGTA	14	1	B2	AGCAGTTAGATCCACTCCCTGAGGT	GTCACCTATGCTGGGTTCGCGTGTATTACACTCGGACCTCGTCGACATGCATTGCTCCTGCAGTTCCGTTGCTCTGTCTTCCTCCTAAGTTTCGAGCTGGACTCAGTGAGCAGTTAGATCCACTCCCTGAGGT	GTCACCTATGCTGGGTTCGCGTGTATTACACTCGGACCTCGTCGACATGCATTGCTCCTGCAGTTCCGTTGCTCTGTCTTCCTCCTAAGTTTCGAGCTGGACTCAGTGAGCAGTTAGATCCACTCCCTGAGGTTTTGGTCGTGC
ENST00000356239	ENSG00000127914	AKAP9	set16	ENSG00000127914	AKAP9	-46	9640	9667	28	CATACTGCTGAGCTCCACTTGCATCTCC	0.932151	-54.3785	0.535714	1	1	1	0	1	1	4	1	1	0	13	1	B1	GTCACCTATGCTGGGTTCGCGTGTA	14	1	B2	AGCAGTTAGATCCACTCCCTGAGGT	GTCACCTATGCTGGGTTCGCGTGTATTACACTCGGACCTCGTCGACATGCATTCATACTGCTGAGCTCCACTTGCATCTCCCCTCCTAAGTTTCGAGCTGGACTCAGTGAGCAGTTAGATCCACTCCCTGAGGT	GTCACCTATGCTGGGTTCGCGTGTATTACACTCGGACCTCGTCGACATGCATTCATACTGCTGAGCTCCACTTGCATCTCCCCTCCTAAGTTTCGAGCTGGACTCAGTGAGCAGTTAGATCCACTCCCTGAGGTTGTCACAGTG
ENST00000356239	ENSG00000127914	AKAP9	set16	ENSG00000127914	AKAP9	-46	5357	5387	31	AAATCTCAGGAGGCACATCTTCAGGTTTTCT	0.932151	-54.8785	0.419355	1	1	1	1	1	1	5	1	1	0	13	1	B1	GTCACCTATGCTGGGTTCGCGTGTA	14	1	B2	AGCAGTTAGATCCACTCCCTGAGGT	GTCACCTATGCTGGGTTCGCGTGTATTACACTCGGACCTCGTCGACATGCATTAAATCTCAGGAGGCACATCTTCAGGTTTTCTCCTCCTAAGTTTCGAGCTGGACTCAGTGAGCAGTTAGATCCACTCCCTGAGGT	GTCACCTATGCTGGGTTCGCGTGTATTACACTCGGACCTCGTCGACATGCATTAAATCTCAGGAGGCACATCTTCAGGTTTTCTCCTCCTAAGTTTCGAGCTGGACTCAGTGAGCAGTTAGATCCACTCCCTGAGGTAGTCACT
ENST00000356239	ENSG00000127914	AKAP9	set16	ENSG00000127914	AKAP9	-46	9573	9603	31	AAGAGTTCTTGGCTTGGTTTCTCACTCTCTT	0.972151	-54.7785	0.419355	1	1	1	0	1	1	4	1	1	0	13	1	B1	GTCACCTATGCTGGGTTCGCGTGTA	14	1	B2	AGCAGTTAGATCCACTCCCTGAGGT	GTCACCTATGCTGGGTTCGCGTGTATTACACTCGGACCTCGTCGACATGCATTAAGAGTTCTTGGCTTGGTTTCTCACTCTCTTCCTCCTAAGTTTCGAGCTGGACTCAGTGAGCAGTTAGATCCACTCCCTGAGGT	GTCACCTATGCTGGGTTCGCGTGTATTACACTCGGACCTCGTCGACATGCATTAAGAGTTCTTGGCTTGGTTTCTCACTCTCTTCCTCCTAAGTTTCGAGCTGGACTCAGTGAGCAGTTAGATCCACTCCCTGAGGTAGAGACA
ENST00000356239	ENSG00000127914	AKAP9	set16	ENSG00000127914	AKAP9	-46	9474	9502	29	CCTTCTATCTGCTTTCTGGAGGCATTCCA	0.972151	-53.9785	0.482759	1	1	1	0	1	1	4	1	1	0	13	1	B1	GTCACCTATGCTGGGTTCGCGTGTA	14	1	B2	AGCAGTTAGATCCACTCCCTGAGGT	GTCACCTATGCTGGGTTCGCGTGTATTACACTCGGACCTCGTCGACATGCATTCCTTCTATCTGCTTTCTGGAGGCATTCCACCTCCTAAGTTTCGAGCTGGACTCAGTGAGCAGTTAGATCCACTCCCTGAGGT	GTCACCTATGCTGGGTTCGCGTGTATTACACTCGGACCTCGTCGACATGCATTCCTTCTATCTGCTTTCTGGAGGCATTCCACCTCCTAAGTTTCGAGCTGGACTCAGTGAGCAGTTAGATCCACTCCCTGAGGTCTATCCGAC
ENST00000356239	ENSG00000127914	AKAP9	set16	ENSG00000127914	AKAP9	-46	9442	9472	31	AGCTGCTTGATATTCAACACCCTGTTCTTGT	0.922151	-54.7785	0.419355	1	1	1	0	1	1	4	1	1	0	13	1	B1	GTCACCTATGCTGGGTTCGCGTGTA	14	1	B2	AGCAGTTAGATCCACTCCCTGAGGT	GTCACCTATGCTGGGTTCGCGTGTATTACACTCGGACCTCGTCGACATGCATTAGCTGCTTGATATTCAACACCCTGTTCTTGTCCTCCTAAGTTTCGAGCTGGACTCAGTGAGCAGTTAGATCCACTCCCTGAGGT	GTCACCTATGCTGGGTTCGCGTGTATTACACTCGGACCTCGTCGACATGCATTAGCTGCTTGATATTCAACACCCTGTTCTTGTCCTCCTAAGTTTCGAGCTGGACTCAGTGAGCAGTTAGATCCACTCCCTGAGGTGGTGCTT
ENST00000356239	ENSG00000127914	AKAP9	set16	ENSG00000127914	AKAP9	-46	9379	9406	28	ATCTGTAGTACCTAGAGCTGTCAGCTCC	0.947849	-53.5785	0.5	1	1	1	0	1	1	4	1	1	0	13	1	B1	GTCACCTATGCTGGGTTCGCGTGTA	14	1	B2	AGCAGTTAGATCCACTCCCTGAGGT	GTCACCTATGCTGGGTTCGCGTGTATTACACTCGGACCTCGTCGACATGCATTATCTGTAGTACCTAGAGCTGTCAGCTCCCCTCCTAAGTTTCGAGCTGGACTCAGTGAGCAGTTAGATCCACTCCCTGAGGT	GTCACCTATGCTGGGTTCGCGTGTATTACACTCGGACCTCGTCGACATGCATTATCTGTAGTACCTAGAGCTGTCAGCTCCCCTCCTAAGTTTCGAGCTGGACTCAGTGAGCAGTTAGATCCACTCCCTGAGGTCACAAGCCGG
ENST00000356239	ENSG00000127914	AKAP9	set16	ENSG00000127914	AKAP9	-46	9119	9146	28	CCTCTCCATCACTATAGGGAGACTCAGT	0.937849	-53.1785	0.5	1	1	1	1	1	0	4	1	1	0	13	1	B1	GTCACCTATGCTGGGTTCGCGTGTA	14	1	B2	AGCAGTTAGATCCACTCCCTGAGGT	GTCACCTATGCTGGGTTCGCGTGTATTACACTCGGACCTCGTCGACATGCATTCCTCTCCATCACTATAGGGAGACTCAGTCCTCCTAAGTTTCGAGCTGGACTCAGTGAGCAGTTAGATCCACTCCCTGAGGT	GTCACCTATGCTGGGTTCGCGTGTATTACACTCGGACCTCGTCGACATGCATTCCTCTCCATCACTATAGGGAGACTCAGTCCTCCTAAGTTTCGAGCTGGACTCAGTGAGCAGTTAGATCCACTCCCTGAGGTCGCTTGGGTT
ENST00000356239	ENSG00000127914	AKAP9	set16	ENSG00000127914	AKAP9	-46	9020	9051	32	GAATCTGTTGCACTTTCACTTTCTTCTCCTCG	0.922151	-55.4785	0.4375	1	1	1	0	1	1	4	1	1	0	13	1	B1	GTCACCTATGCTGGGTTCGCGTGTA	14	1	B2	AGCAGTTAGATCCACTCCCTGAGGT	GTCACCTATGCTGGGTTCGCGTGTATTACACTCGGACCTCGTCGACATGCATTGAATCTGTTGCACTTTCACTTTCTTCTCCTCGCCTCCTAAGTTTCGAGCTGGACTCAGTGAGCAGTTAGATCCACTCCCTGAGGT	GTCACCTATGCTGGGTTCGCGTGTATTACACTCGGACCTCGTCGACATGCATTGAATCTGTTGCACTTTCACTTTCTTCTCCTCGCCTCCTAAGTTTCGAGCTGGACTCAGTGAGCAGTTAGATCCACTCCCTGAGGTCGGCAC
ENST00000356239	ENSG00000127914	AKAP9	set16	ENSG00000127914	AKAP9	-46	9898	9925	28	GGCTTTCTCTTTCTCCAAAGCCCACTGG	0.952151	-53.7785	0.535714	1	1	1	0	1	1	4	1	1	0	13	1	B1	GTCACCTATGCTGGGTTCGCGTGTA	14	1	B2	AGCAGTTAGATCCACTCCCTGAGGT	GTCACCTATGCTGGGTTCGCGTGTATTACACTCGGACCTCGTCGACATGCATTGGCTTTCTCTTTCTCCAAAGCCCACTGGCCTCCTAAGTTTCGAGCTGGACTCAGTGAGCAGTTAGATCCACTCCCTGAGGT	GTCACCTATGCTGGGTTCGCGTGTATTACACTCGGACCTCGTCGACATGCATTGGCTTTCTCTTTCTCCAAAGCCCACTGGCCTCCTAAGTTTCGAGCTGGACTCAGTGAGCAGTTAGATCCACTCCCTGAGGTCCGCAGTCAA
ENST00000356239	ENSG00000127914	AKAP9	set16	ENSG00000127914	AKAP9	-46	2353	2385	33	TCTTCTGACTTTGAATTTACAAGAGACTGCTGT	0.997849	-54.9785	0.363636	1	1	1	1	1	1	5	1	1	0	13	1	B1	GTCACCTATGCTGGGTTCGCGTGTA	14	1	B2	AGCAGTTAGATCCACTCCCTGAGGT	GTCACCTATGCTGGGTTCGCGTGTATTACACTCGGACCTCGTCGACATGCATTTCTTCTGACTTTGAATTTACAAGAGACTGCTGTCCTCCTAAGTTTCGAGCTGGACTCAGTGAGCAGTTAGATCCACTCCCTGAGGT	GTCACCTATGCTGGGTTCGCGTGTATTACACTCGGACCTCGTCGACATGCATTTCTTCTGACTTTGAATTTACAAGAGACTGCTGTCCTCCTAAGTTTCGAGCTGGACTCAGTGAGCAGTTAGATCCACTCCCTGAGGTGGTTG
ENST00000356239	ENSG00000127914	AKAP9	set16	ENSG00000127914	AKAP9	-46	11477	11505	29	GTGATCACCTCTAGATCCGTGAAAGCTGG	0.912151	-54.7785	0.517241	1	1	1	1	1	0	4	1	1	0	13	1	B1	GTCACCTATGCTGGGTTCGCGTGTA	14	1	B2	AGCAGTTAGATCCACTCCCTGAGGT	GTCACCTATGCTGGGTTCGCGTGTATTACACTCGGACCTCGTCGACATGCATTGTGATCACCTCTAGATCCGTGAAAGCTGGCCTCCTAAGTTTCGAGCTGGACTCAGTGAGCAGTTAGATCCACTCCCTGAGGT	GTCACCTATGCTGGGTTCGCGTGTATTACACTCGGACCTCGTCGACATGCATTGTGATCACCTCTAGATCCGTGAAAGCTGGCCTCCTAAGTTTCGAGCTGGACTCAGTGAGCAGTTAGATCCACTCCCTGAGGTCTAAAGTGC
ENST00000356239	ENSG00000127914	AKAP9	set16	ENSG00000127914	AKAP9	-46	1907	1940	34	CTGTACTAAGGGACTTATGTGCTTCATTAAGTTT	0.967849	-54.3785	0.352941	1	1	1	1	1	1	5	1	1	0	13	1	B1	GTCACCTATGCTGGGTTCGCGTGTA	14	1	B2	AGCAGTTAGATCCACTCCCTGAGGT	GTCACCTATGCTGGGTTCGCGTGTATTACACTCGGACCTCGTCGACATGCATTCTGTACTAAGGGACTTATGTGCTTCATTAAGTTTCCTCCTAAGTTTCGAGCTGGACTCAGTGAGCAGTTAGATCCACTCCCTGAGGT	GTCACCTATGCTGGGTTCGCGTGTATTACACTCGGACCTCGTCGACATGCATTCTGTACTAAGGGACTTATGTGCTTCATTAAGTTTCCTCCTAAGTTTCGAGCTGGACTCAGTGAGCAGTTAGATCCACTCCCTGAGGTTTAG
ENST00000356239	ENSG00000127914	AKAP9	set16	ENSG00000127914	AKAP9	-46	11363	11395	33	CTTCTGGTAAATGAGAGCCTTTCGAAAACTTTC	0.947849	-54.1785	0.393939	1	1	0	1	1	1	4	1	1	0	13	1	B1	GTCACCTATGCTGGGTTCGCGTGTA	14	1	B2	AGCAGTTAGATCCACTCCCTGAGGT	GTCACCTATGCTGGGTTCGCGTGTATTACACTCGGACCTCGTCGACATGCATTCTTCTGGTAAATGAGAGCCTTTCGAAAACTTTCCCTCCTAAGTTTCGAGCTGGACTCAGTGAGCAGTTAGATCCACTCCCTGAGGT	GTCACCTATGCTGGGTTCGCGTGTATTACACTCGGACCTCGTCGACATGCATTCTTCTGGTAAATGAGAGCCTTTCGAAAACTTTCCCTCCTAAGTTTCGAGCTGGACTCAGTGAGCAGTTAGATCCACTCCCTGAGGTGGAAA
ENST00000356239	ENSG00000127914	AKAP9	set16	ENSG00000127914	AKAP9	-46	11225	11255	31	CTTCAGCCTCTGCCCTTTTCAAAGATTTCTG	0.972151	-54.3785	0.451613	1	1	1	0	1	1	4	1	1	0	13	1	B1	GTCACCTATGCTGGGTTCGCGTGTA	14	1	B2	AGCAGTTAGATCCACTCCCTGAGGT	GTCACCTATGCTGGGTTCGCGTGTATTACACTCGGACCTCGTCGACATGCATTCTTCAGCCTCTGCCCTTTTCAAAGATTTCTGCCTCCTAAGTTTCGAGCTGGACTCAGTGAGCAGTTAGATCCACTCCCTGAGGT	GTCACCTATGCTGGGTTCGCGTGTATTACACTCGGACCTCGTCGACATGCATTCTTCAGCCTCTGCCCTTTTCAAAGATTTCTGCCTCCTAAGTTTCGAGCTGGACTCAGTGAGCAGTTAGATCCACTCCCTGAGGTACAATGC
ENST00000356239	ENSG00000127914	AKAP9	set16	ENSG00000127914	AKAP9	-46	9605	9638	34	GCATTTGAGACTGCTTCTGCTGTATATTATATTC	0.957849	-54.6785	0.352941	1	1	1	0	1	1	4	1	1	0	13	1	B1	GTCACCTATGCTGGGTTCGCGTGTA	14	1	B2	AGCAGTTAGATCCACTCCCTGAGGT	GTCACCTATGCTGGGTTCGCGTGTATTACACTCGGACCTCGTCGACATGCATTGCATTTGAGACTGCTTCTGCTGTATATTATATTCCCTCCTAAGTTTCGAGCTGGACTCAGTGAGCAGTTAGATCCACTCCCTGAGGT	GTCACCTATGCTGGGTTCGCGTGTATTACACTCGGACCTCGTCGACATGCATTGCATTTGAGACTGCTTCTGCTGTATATTATATTCCCTCCTAAGTTTCGAGCTGGACTCAGTGAGCAGTTAGATCCACTCCCTGAGGTGTCC
ENST00000356239	ENSG00000127914	AKAP9	set16	ENSG00000127914	AKAP9	-46	11031	11063	33	AGTCATTCTTCTCTTCAGTCAGTTGACTGATAT	0.992151	-55.2785	0.363636	1	1	1	0	1	1	4	1	1	0	13	1	B1	GTCACCTATGCTGGGTTCGCGTGTA	14	1	B2	AGCAGTTAGATCCACTCCCTGAGGT	GTCACCTATGCTGGGTTCGCGTGTATTACACTCGGACCTCGTCGACATGCATTAGTCATTCTTCTCTTCAGTCAGTTGACTGATATCCTCCTAAGTTTCGAGCTGGACTCAGTGAGCAGTTAGATCCACTCCCTGAGGT	GTCACCTATGCTGGGTTCGCGTGTATTACACTCGGACCTCGTCGACATGCATTAGTCATTCTTCTCTTCAGTCAGTTGACTGATATCCTCCTAAGTTTCGAGCTGGACTCAGTGAGCAGTTAGATCCACTCCCTGAGGTTGCCA
ENST00000356239	ENSG00000127914	AKAP9	set16	ENSG00000127914	AKAP9	-46	11001	11029	29	CCCTGTCAGCTCAGCATTTTGTCTCAGTA	0.982151	-53.9785	0.482759	1	1	1	0	1	1	4	1	1	0	13	1	B1	GTCACCTATGCTGGGTTCGCGTGTA	14	1	B2	AGCAGTTAGATCCACTCCCTGAGGT	GTCACCTATGCTGGGTTCGCGTGTATTACACTCGGACCTCGTCGACATGCATTCCCTGTCAGCTCAGCATTTTGTCTCAGTACCTCCTAAGTTTCGAGCTGGACTCAGTGAGCAGTTAGATCCACTCCCTGAGGT	GTCACCTATGCTGGGTTCGCGTGTATTACACTCGGACCTCGTCGACATGCATTCCCTGTCAGCTCAGCATTTTGTCTCAGTACCTCCTAAGTTTCGAGCTGGACTCAGTGAGCAGTTAGATCCACTCCCTGAGGTCAGAACGGG
ENST00000356239	ENSG00000127914	AKAP9	set16	ENSG00000127914	AKAP9	-46	10941	10966	26	GGACACCAAGCTGGGCTCTTCACCTT	0.972151	-53.0785	0.576923	1	1	1	0	1	1	4	1	1	0	13	1	B1	GTCACCTATGCTGGGTTCGCGTGTA	14	1	B2	AGCAGTTAGATCCACTCCCTGAGGT	GTCACCTATGCTGGGTTCGCGTGTATTACACTCGGACCTCGTCGACATGCATTGGACACCAAGCTGGGCTCTTCACCTTCCTCCTAAGTTTCGAGCTGGACTCAGTGAGCAGTTAGATCCACTCCCTGAGGT	GTCACCTATGCTGGGTTCGCGTGTATTACACTCGGACCTCGTCGACATGCATTGGACACCAAGCTGGGCTCTTCACCTTCCTCCTAAGTTTCGAGCTGGACTCAGTGAGCAGTTAGATCCACTCCCTGAGGTGTGAGGTGGGGT
ENST00000356239	ENSG00000127914	AKAP9	set16	ENSG00000127914	AKAP9	-46	10835	10864	30	TGCTGTTTCAAACTGTAGTCTCTCAGAGGC	0.902151	-55.3785	0.466667	1	1	1	0	1	1	4	1	1	0	13	1	B1	GTCACCTATGCTGGGTTCGCGTGTA	14	1	B2	AGCAGTTAGATCCACTCCCTGAGGT	GTCACCTATGCTGGGTTCGCGTGTATTACACTCGGACCTCGTCGACATGCATTTGCTGTTTCAAACTGTAGTCTCTCAGAGGCCCTCCTAAGTTTCGAGCTGGACTCAGTGAGCAGTTAGATCCACTCCCTGAGGT	GTCACCTATGCTGGGTTCGCGTGTATTACACTCGGACCTCGTCGACATGCATTTGCTGTTTCAAACTGTAGTCTCTCAGAGGCCCTCCTAAGTTTCGAGCTGGACTCAGTGAGCAGTTAGATCCACTCCCTGAGGTTATTAGGC
ENST00000356239	ENSG00000127914	AKAP9	set16	ENSG00000127914	AKAP9	-46	10804	10833	30	TTCTGGGGTAGAACCTGTAGTTTTGAAGCT	0.987849	-53.6785	0.433333	1	1	1	0	1	1	4	1	1	0	13	1	B1	GTCACCTATGCTGGGTTCGCGTGTA	14	1	B2	AGCAGTTAGATCCACTCCCTGAGGT	GTCACCTATGCTGGGTTCGCGTGTATTACACTCGGACCTCGTCGACATGCATTTTCTGGGGTAGAACCTGTAGTTTTGAAGCTCCTCCTAAGTTTCGAGCTGGACTCAGTGAGCAGTTAGATCCACTCCCTGAGGT	GTCACCTATGCTGGGTTCGCGTGTATTACACTCGGACCTCGTCGACATGCATTTTCTGGGGTAGAACCTGTAGTTTTGAAGCTCCTCCTAAGTTTCGAGCTGGACTCAGTGAGCAGTTAGATCCACTCCCTGAGGTCATGGCAT
ENST00000356239	ENSG00000127914	AKAP9	set16	ENSG00000127914	AKAP9	-46	10737	10765	29	ATTACAGCCGGTTCCTCCTCCATTCATTT	0.907849	-52.2785	0.448276	1	1	1	0	1	1	4	1	1	0	13	1	B1	GTCACCTATGCTGGGTTCGCGTGTA	14	1	B2	AGCAGTTAGATCCACTCCCTGAGGT	GTCACCTATGCTGGGTTCGCGTGTATTACACTCGGACCTCGTCGACATGCATTATTACAGCCGGTTCCTCCTCCATTCATTTCCTCCTAAGTTTCGAGCTGGACTCAGTGAGCAGTTAGATCCACTCCCTGAGGT	GTCACCTATGCTGGGTTCGCGTGTATTACACTCGGACCTCGTCGACATGCATTATTACAGCCGGTTCCTCCTCCATTCATTTCCTCCTAAGTTTCGAGCTGGACTCAGTGAGCAGTTAGATCCACTCCCTGAGGTAATCTTCTT
ENST00000356239	ENSG00000127914	AKAP9	set16	ENSG00000127914	AKAP9	-46	10634	10660	27	ACTGGTTAAGCTCCACGTGGTTGGCTC	0.952151	-53.4785	0.555556	1	1	1	0	1	1	4	1	1	0	13	1	B1	GTCACCTATGCTGGGTTCGCGTGTA	14	1	B2	AGCAGTTAGATCCACTCCCTGAGGT	GTCACCTATGCTGGGTTCGCGTGTATTACACTCGGACCTCGTCGACATGCATTACTGGTTAAGCTCCACGTGGTTGGCTCCCTCCTAAGTTTCGAGCTGGACTCAGTGAGCAGTTAGATCCACTCCCTGAGGT	GTCACCTATGCTGGGTTCGCGTGTATTACACTCGGACCTCGTCGACATGCATTACTGGTTAAGCTCCACGTGGTTGGCTCCCTCCTAAGTTTCGAGCTGGACTCAGTGAGCAGTTAGATCCACTCCCTGAGGTCCGGCCAGTAC
ENST00000356239	ENSG00000127914	AKAP9	set16	ENSG00000127914	AKAP9	-46	10533	10561	29	CTGCATGATTCCTTGTAGTCGCTGTCCTT	0.967849	-53.3785	0.482759	1	1	1	0	1	1	4	1	1	0	13	1	B1	GTCACCTATGCTGGGTTCGCGTGTA	14	1	B2	AGCAGTTAGATCCACTCCCTGAGGT	GTCACCTATGCTGGGTTCGCGTGTATTACACTCGGACCTCGTCGACATGCATTCTGCATGATTCCTTGTAGTCGCTGTCCTTCCTCCTAAGTTTCGAGCTGGACTCAGTGAGCAGTTAGATCCACTCCCTGAGGT	GTCACCTATGCTGGGTTCGCGTGTATTACACTCGGACCTCGTCGACATGCATTCTGCATGATTCCTTGTAGTCGCTGTCCTTCCTCCTAAGTTTCGAGCTGGACTCAGTGAGCAGTTAGATCCACTCCCTGAGGTCGACAGGTC
ENST00000356239	ENSG00000127914	AKAP9	set16	ENSG00000127914	AKAP9	-46	10467	10494	28	AGCTGGCGCTGAAGATCTTCCACTTTGG	0.922151	-54.2785	0.535714	1	1	1	0	1	1	4	1	1	0	13	1	B1	GTCACCTATGCTGGGTTCGCGTGTA	14	1	B2	AGCAGTTAGATCCACTCCCTGAGGT	GTCACCTATGCTGGGTTCGCGTGTATTACACTCGGACCTCGTCGACATGCATTAGCTGGCGCTGAAGATCTTCCACTTTGGCCTCCTAAGTTTCGAGCTGGACTCAGTGAGCAGTTAGATCCACTCCCTGAGGT	GTCACCTATGCTGGGTTCGCGTGTATTACACTCGGACCTCGTCGACATGCATTAGCTGGCGCTGAAGATCTTCCACTTTGGCCTCCTAAGTTTCGAGCTGGACTCAGTGAGCAGTTAGATCCACTCCCTGAGGTCAACACTGAG
ENST00000356239	ENSG00000127914	AKAP9	set16	ENSG00000127914	AKAP9	-46	10436	10465	30	CTGGAGCTCATGCATTTTTTTCTGTCCCTC	0.982151	-53.9785	0.466667	1	1	1	0	1	1	4	1	1	0	13	1	B1	GTCACCTATGCTGGGTTCGCGTGTA	14	1	B2	AGCAGTTAGATCCACTCCCTGAGGT	GTCACCTATGCTGGGTTCGCGTGTATTACACTCGGACCTCGTCGACATGCATTCTGGAGCTCATGCATTTTTTTCTGTCCCTCCCTCCTAAGTTTCGAGCTGGACTCAGTGAGCAGTTAGATCCACTCCCTGAGGT	GTCACCTATGCTGGGTTCGCGTGTATTACACTCGGACCTCGTCGACATGCATTCTGGAGCTCATGCATTTTTTTCTGTCCCTCCCTCCTAAGTTTCGAGCTGGACTCAGTGAGCAGTTAGATCCACTCCCTGAGGTCACTTGCT
ENST00000356239	ENSG00000127914	AKAP9	set16	ENSG00000127914	AKAP9	-46	10409	10434	26	GTGTTGGCCTCCTGTTCTGTCTGCAG	0.917849	-52.0785	0.576923	1	1	1	0	1	1	4	1	1	0	13	1	B1	GTCACCTATGCTGGGTTCGCGTGTA	14	1	B2	AGCAGTTAGATCCACTCCCTGAGGT	GTCACCTATGCTGGGTTCGCGTGTATTACACTCGGACCTCGTCGACATGCATTGTGTTGGCCTCCTGTTCTGTCTGCAGCCTCCTAAGTTTCGAGCTGGACTCAGTGAGCAGTTAGATCCACTCCCTGAGGT	GTCACCTATGCTGGGTTCGCGTGTATTACACTCGGACCTCGTCGACATGCATTGTGTTGGCCTCCTGTTCTGTCTGCAGCCTCCTAAGTTTCGAGCTGGACTCAGTGAGCAGTTAGATCCACTCCCTGAGGTATTATTCCAGTG
ENST00000356239	ENSG00000127914	AKAP9	set16	ENSG00000127914	AKAP9	-46	6771	6801	31	TCTAGGGACAATTCTGGTTTAGCTTCTACAG	0.947849	-53.7785	0.419355	1	1	1	1	1	1	5	1	1	0	13	1	B1	GTCACCTATGCTGGGTTCGCGTGTA	14	1	B2	AGCAGTTAGATCCACTCCCTGAGGT	GTCACCTATGCTGGGTTCGCGTGTATTACACTCGGACCTCGTCGACATGCATTTCTAGGGACAATTCTGGTTTAGCTTCTACAGCCTCCTAAGTTTCGAGCTGGACTCAGTGAGCAGTTAGATCCACTCCCTGAGGT	GTCACCTATGCTGGGTTCGCGTGTATTACACTCGGACCTCGTCGACATGCATTTCTAGGGACAATTCTGGTTTAGCTTCTACAGCCTCCTAAGTTTCGAGCTGGACTCAGTGAGCAGTTAGATCCACTCCCTGAGGTCTGTGAC
ENST00000356239	ENSG00000127914	AKAP9	set16	ENSG00000127914	AKAP9	-46	5555	5584	30	ACATGACTTTACAGATGCCTCTGCTTCTGA	0.992151	-54.2785	0.433333	1	1	1	1	1	1	5	1	1	0	13	1	B1	GTCACCTATGCTGGGTTCGCGTGTA	14	1	B2	AGCAGTTAGATCCACTCCCTGAGGT	GTCACCTATGCTGGGTTCGCGTGTATTACACTCGGACCTCGTCGACATGCATTACATGACTTTACAGATGCCTCTGCTTCTGACCTCCTAAGTTTCGAGCTGGACTCAGTGAGCAGTTAGATCCACTCCCTGAGGT	GTCACCTATGCTGGGTTCGCGTGTATTACACTCGGACCTCGTCGACATGCATTACATGACTTTACAGATGCCTCTGCTTCTGACCTCCTAAGTTTCGAGCTGGACTCAGTGAGCAGTTAGATCCACTCCCTGAGGTATAACAAG
ENST00000356239	ENSG00000127914	AKAP9	set16	ENSG00000127914	AKAP9	-46	10377	10407	31	GTTTTCCTGTGAACCTGCCTATCTTTTTCCA	0.992151	-53.8785	0.419355	1	1	1	0	1	1	4	1	1	0	13	1	B1	GTCACCTATGCTGGGTTCGCGTGTA	14	1	B2	AGCAGTTAGATCCACTCCCTGAGGT	GTCACCTATGCTGGGTTCGCGTGTATTACACTCGGACCTCGTCGACATGCATTGTTTTCCTGTGAACCTGCCTATCTTTTTCCACCTCCTAAGTTTCGAGCTGGACTCAGTGAGCAGTTAGATCCACTCCCTGAGGT	GTCACCTATGCTGGGTTCGCGTGTATTACACTCGGACCTCGTCGACATGCATTGTTTTCCTGTGAACCTGCCTATCTTTTTCCACCTCCTAAGTTTCGAGCTGGACTCAGTGAGCAGTTAGATCCACTCCCTGAGGTAAGGGGT
ENST00000356239	ENSG00000127914	AKAP9	set16	ENSG00000127914	AKAP9	-46	10274	10304	31	GTTTTTCCTCTAGCTGTTTCTGCAGCTCTTT	0.947849	-53.9785	0.419355	1	1	1	0	1	1	4	1	1	0	13	1	B1	GTCACCTATGCTGGGTTCGCGTGTA	14	1	B2	AGCAGTTAGATCCACTCCCTGAGGT	GTCACCTATGCTGGGTTCGCGTGTATTACACTCGGACCTCGTCGACATGCATTGTTTTTCCTCTAGCTGTTTCTGCAGCTCTTTCCTCCTAAGTTTCGAGCTGGACTCAGTGAGCAGTTAGATCCACTCCCTGAGGT	GTCACCTATGCTGGGTTCGCGTGTATTACACTCGGACCTCGTCGACATGCATTGTTTTTCCTCTAGCTGTTTCTGCAGCTCTTTCCTCCTAAGTTTCGAGCTGGACTCAGTGAGCAGTTAGATCCACTCCCTGAGGTTGGTATG
ENST00000356239	ENSG00000127914	AKAP9	set16	ENSG00000127914	AKAP9	-46	10248	10272	25	AGTAGGTCCTCTGAGGGCAAGGGTG	0.917849	-51.7785	0.6	1	1	1	0	1	1	4	1	1	0	13	1	B1	GTCACCTATGCTGGGTTCGCGTGTA	14	1	B2	AGCAGTTAGATCCACTCCCTGAGGT	GTCACCTATGCTGGGTTCGCGTGTATTACACTCGGACCTCGTCGACATGCATTAGTAGGTCCTCTGAGGGCAAGGGTGCCTCCTAAGTTTCGAGCTGGACTCAGTGAGCAGTTAGATCCACTCCCTGAGGT	GTCACCTATGCTGGGTTCGCGTGTATTACACTCGGACCTCGTCGACATGCATTAGTAGGTCCTCTGAGGGCAAGGGTGCCTCCTAAGTTTCGAGCTGGACTCAGTGAGCAGTTAGATCCACTCCCTGAGGTATCCAGGCTGTAA
ENST00000356239	ENSG00000127914	AKAP9	set16	ENSG00000127914	AKAP9	-46	10194	10218	25	TGCAGCTGTGCGTGCAATTCCCGCT	0.957849	-52.0785	0.6	1	1	1	0	1	1	4	1	1	0	13	1	B1	GTCACCTATGCTGGGTTCGCGTGTA	14	1	B2	AGCAGTTAGATCCACTCCCTGAGGT	GTCACCTATGCTGGGTTCGCGTGTATTACACTCGGACCTCGTCGACATGCATTTGCAGCTGTGCGTGCAATTCCCGCTCCTCCTAAGTTTCGAGCTGGACTCAGTGAGCAGTTAGATCCACTCCCTGAGGT	GTCACCTATGCTGGGTTCGCGTGTATTACACTCGGACCTCGTCGACATGCATTTGCAGCTGTGCGTGCAATTCCCGCTCCTCCTAAGTTTCGAGCTGGACTCAGTGAGCAGTTAGATCCACTCCCTGAGGTTATCACGAGTGAG
ENST00000356239	ENSG00000127914	AKAP9	set16	ENSG00000127914	AKAP9	-46	153	179	27	AAAGGTCGATTTGGACGGAGGTGGGAC	0.982151	-52.9785	0.555556	1	1	1	1	1	1	5	1	1	0	13	1	B1	GTCACCTATGCTGGGTTCGCGTGTA	14	1	B2	AGCAGTTAGATCCACTCCCTGAGGT	GTCACCTATGCTGGGTTCGCGTGTATTACACTCGGACCTCGTCGACATGCATTAAAGGTCGATTTGGACGGAGGTGGGACCCTCCTAAGTTTCGAGCTGGACTCAGTGAGCAGTTAGATCCACTCCCTGAGGT	GTCACCTATGCTGGGTTCGCGTGTATTACACTCGGACCTCGTCGACATGCATTAAAGGTCGATTTGGACGGAGGTGGGACCCTCCTAAGTTTCGAGCTGGACTCAGTGAGCAGTTAGATCCACTCCCTGAGGTCTGACGCGTGT
ENST00000356239	ENSG00000127914	AKAP9	set16	ENSG00000127914	AKAP9	-46	77	102	26	GAAGTGGAAGCAGTCTCCGCGCTCAC	0.972151	-53.6785	0.615385	1	1	1	1	1	1	5	1	1	0	13	1	B1	GTCACCTATGCTGGGTTCGCGTGTA	14	1	B2	AGCAGTTAGATCCACTCCCTGAGGT	GTCACCTATGCTGGGTTCGCGTGTATTACACTCGGACCTCGTCGACATGCATTGAAGTGGAAGCAGTCTCCGCGCTCACCCTCCTAAGTTTCGAGCTGGACTCAGTGAGCAGTTAGATCCACTCCCTGAGGT	GTCACCTATGCTGGGTTCGCGTGTATTACACTCGGACCTCGTCGACATGCATTGAAGTGGAAGCAGTCTCCGCGCTCACCCTCCTAAGTTTCGAGCTGGACTCAGTGAGCAGTTAGATCCACTCCCTGAGGTCTAAGTGGTCGT
ENST00000356239	ENSG00000127914	AKAP9	set16	ENSG00000127914	AKAP9	-46	11887	11915	29	TAGTTCCAAGTCGTCTTTGCAGTGCCTCT	0.942151	-54.4785	0.482759	1	1	1	0	1	1	4	1	1	0	13	1	B1	GTCACCTATGCTGGGTTCGCGTGTA	14	1	B2	AGCAGTTAGATCCACTCCCTGAGGT	GTCACCTATGCTGGGTTCGCGTGTATTACACTCGGACCTCGTCGACATGCATTTAGTTCCAAGTCGTCTTTGCAGTGCCTCTCCTCCTAAGTTTCGAGCTGGACTCAGTGAGCAGTTAGATCCACTCCCTGAGGT	GTCACCTATGCTGGGTTCGCGTGTATTACACTCGGACCTCGTCGACATGCATTTAGTTCCAAGTCGTCTTTGCAGTGCCTCTCCTCCTAAGTTTCGAGCTGGACTCAGTGAGCAGTTAGATCCACTCCCTGAGGTGGGCGTTAT
ENST00000356239	ENSG00000127914	AKAP9	set16	ENSG00000127914	AKAP9	-46	11856	11885	30	GCCGAGTGATATAATCTGTTAGGGCTCTGT	0.922151	-54.8785	0.466667	1	1	1	0	1	1	4	1	1	0	13	1	B1	GTCACCTATGCTGGGTTCGCGTGTA	14	1	B2	AGCAGTTAGATCCACTCCCTGAGGT	GTCACCTATGCTGGGTTCGCGTGTATTACACTCGGACCTCGTCGACATGCATTGCCGAGTGATATAATCTGTTAGGGCTCTGTCCTCCTAAGTTTCGAGCTGGACTCAGTGAGCAGTTAGATCCACTCCCTGAGGT	GTCACCTATGCTGGGTTCGCGTGTATTACACTCGGACCTCGTCGACATGCATTGCCGAGTGATATAATCTGTTAGGGCTCTGTCCTCCTAAGTTTCGAGCTGGACTCAGTGAGCAGTTAGATCCACTCCCTGAGGTCATTTGAA
ENST00000356239	ENSG00000127914	AKAP9	set16	ENSG00000127914	AKAP9	-46	9863	9896	34	GCTCTCTTGATTTTTTCTGTTCACTTGCTAATGT	0.997849	-54.9785	0.352941	1	1	1	0	1	1	4	1	1	0	13	1	B1	GTCACCTATGCTGGGTTCGCGTGTA	14	1	B2	AGCAGTTAGATCCACTCCCTGAGGT	GTCACCTATGCTGGGTTCGCGTGTATTACACTCGGACCTCGTCGACATGCATTGCTCTCTTGATTTTTTCTGTTCACTTGCTAATGTCCTCCTAAGTTTCGAGCTGGACTCAGTGAGCAGTTAGATCCACTCCCTGAGGT	GTCACCTATGCTGGGTTCGCGTGTATTACACTCGGACCTCGTCGACATGCATTGCTCTCTTGATTTTTTCTGTTCACTTGCTAATGTCCTCCTAAGTTTCGAGCTGGACTCAGTGAGCAGTTAGATCCACTCCCTGAGGTCCGG
ENST00000356239	ENSG00000127914	AKAP9	set16	ENSG00000127914	AKAP9	-46	11535	11560	26	TGCAATGGATACTCTGACGGCCGACC	0.967849	-52.4785	0.576923	1	1	1	1	1	1	5	1	1	0	13	1	B1	GTCACCTATGCTGGGTTCGCGTGTA	14	1	B2	AGCAGTTAGATCCACTCCCTGAGGT	GTCACCTATGCTGGGTTCGCGTGTATTACACTCGGACCTCGTCGACATGCATTTGCAATGGATACTCTGACGGCCGACCCCTCCTAAGTTTCGAGCTGGACTCAGTGAGCAGTTAGATCCACTCCCTGAGGT	GTCACCTATGCTGGGTTCGCGTGTATTACACTCGGACCTCGTCGACATGCATTTGCAATGGATACTCTGACGGCCGACCCCTCCTAAGTTTCGAGCTGGACTCAGTGAGCAGTTAGATCCACTCCCTGAGGTAGCGCTCATGTG
ENST00000356239	ENSG00000127914	AKAP9	set16	ENSG00000127914	AKAP9	-46	11425	11451	27	GCCAAGGTGGCATCTTCACATTCCTGG	0.972151	-52.9785	0.555556	1	1	1	0	1	1	4	1	1	0	13	1	B1	GTCACCTATGCTGGGTTCGCGTGTA	14	1	B2	AGCAGTTAGATCCACTCCCTGAGGT	GTCACCTATGCTGGGTTCGCGTGTATTACACTCGGACCTCGTCGACATGCATTGCCAAGGTGGCATCTTCACATTCCTGGCCTCCTAAGTTTCGAGCTGGACTCAGTGAGCAGTTAGATCCACTCCCTGAGGT	GTCACCTATGCTGGGTTCGCGTGTATTACACTCGGACCTCGTCGACATGCATTGCCAAGGTGGCATCTTCACATTCCTGGCCTCCTAAGTTTCGAGCTGGACTCAGTGAGCAGTTAGATCCACTCCCTGAGGTTATTCGCTGCG
ENST00000356239	ENSG00000127914	AKAP9	set16	ENSG00000127914	AKAP9	-46	1810	1838	29	CAAGGTCTTCAAGCTGTCTCTGTAGAGCA	0.987849	-54.0785	0.482759	1	1	1	1	1	1	5	1	1	0	13	1	B1	GTCACCTATGCTGGGTTCGCGTGTA	14	1	B2	AGCAGTTAGATCCACTCCCTGAGGT	GTCACCTATGCTGGGTTCGCGTGTATTACACTCGGACCTCGTCGACATGCATTCAAGGTCTTCAAGCTGTCTCTGTAGAGCACCTCCTAAGTTTCGAGCTGGACTCAGTGAGCAGTTAGATCCACTCCCTGAGGT	GTCACCTATGCTGGGTTCGCGTGTATTACACTCGGACCTCGTCGACATGCATTCAAGGTCTTCAAGCTGTCTCTGTAGAGCACCTCCTAAGTTTCGAGCTGGACTCAGTGAGCAGTTAGATCCACTCCCTGAGGTCTGGCTCGT
ENST00000356239	ENSG00000127914	AKAP9	set16	ENSG00000127914	AKAP9	-46	1535	1561	27	ATACATCTCATCCAGCTCTGCCCGGAG	0.962151	-53.6785	0.555556	1	1	1	1	1	1	5	1	1	0	13	1	B1	GTCACCTATGCTGGGTTCGCGTGTA	14	1	B2	AGCAGTTAGATCCACTCCCTGAGGT	GTCACCTATGCTGGGTTCGCGTGTATTACACTCGGACCTCGTCGACATGCATTATACATCTCATCCAGCTCTGCCCGGAGCCTCCTAAGTTTCGAGCTGGACTCAGTGAGCAGTTAGATCCACTCCCTGAGGT	GTCACCTATGCTGGGTTCGCGTGTATTACACTCGGACCTCGTCGACATGCATTATACATCTCATCCAGCTCTGCCCGGAGCCTCCTAAGTTTCGAGCTGGACTCAGTGAGCAGTTAGATCCACTCCCTGAGGTGTATTCGCTTA
ENST00000356239	ENSG00000127914	AKAP9	set16	ENSG00000127914	AKAP9	-46	960	992	33	TCAGAGTTTCACTAGCCTGTAATTGCTGAAATT	0.982151	-54.8785	0.363636	1	1	1	1	1	1	5	1	1	0	13	1	B1	GTCACCTATGCTGGGTTCGCGTGTA	14	1	B2	AGCAGTTAGATCCACTCCCTGAGGT	GTCACCTATGCTGGGTTCGCGTGTATTACACTCGGACCTCGTCGACATGCATTTCAGAGTTTCACTAGCCTGTAATTGCTGAAATTCCTCCTAAGTTTCGAGCTGGACTCAGTGAGCAGTTAGATCCACTCCCTGAGGT	GTCACCTATGCTGGGTTCGCGTGTATTACACTCGGACCTCGTCGACATGCATTTCAGAGTTTCACTAGCCTGTAATTGCTGAAATTCCTCCTAAGTTTCGAGCTGGACTCAGTGAGCAGTTAGATCCACTCCCTGAGGTTCTGA
ENST00000356239	ENSG00000127914	AKAP9	set16	ENSG00000127914	AKAP9	-46	853	886	34	TTGTTGTAAATTAGCAGTGAGCTGGGTTATAATG	0.992151	-54.4785	0.352941	1	1	1	1	1	1	5	1	1	0	13	1	B1	GTCACCTATGCTGGGTTCGCGTGTA	14	1	B2	AGCAGTTAGATCCACTCCCTGAGGT	GTCACCTATGCTGGGTTCGCGTGTATTACACTCGGACCTCGTCGACATGCATTTTGTTGTAAATTAGCAGTGAGCTGGGTTATAATGCCTCCTAAGTTTCGAGCTGGACTCAGTGAGCAGTTAGATCCACTCCCTGAGGT	GTCACCTATGCTGGGTTCGCGTGTATTACACTCGGACCTCGTCGACATGCATTTTGTTGTAAATTAGCAGTGAGCTGGGTTATAATGCCTCCTAAGTTTCGAGCTGGACTCAGTGAGCAGTTAGATCCACTCCCTGAGGTTGGG
ENST00000356239	ENSG00000127914	AKAP9	set16	ENSG00000127914	AKAP9	-46	698	728	31	ACTCACTTTCCATCATCTCTAGATGAGTCGG	0.892151	-55.6785	0.451613	1	1	1	1	1	1	5	1	1	0	13	1	B1	GTCACCTATGCTGGGTTCGCGTGTA	14	1	B2	AGCAGTTAGATCCACTCCCTGAGGT	GTCACCTATGCTGGGTTCGCGTGTATTACACTCGGACCTCGTCGACATGCATTACTCACTTTCCATCATCTCTAGATGAGTCGGCCTCCTAAGTTTCGAGCTGGACTCAGTGAGCAGTTAGATCCACTCCCTGAGGT	GTCACCTATGCTGGGTTCGCGTGTATTACACTCGGACCTCGTCGACATGCATTACTCACTTTCCATCATCTCTAGATGAGTCGGCCTCCTAAGTTTCGAGCTGGACTCAGTGAGCAGTTAGATCCACTCCCTGAGGTCGGACCA
ENST00000356239	ENSG00000127914	AKAP9	set16	ENSG00000127914	AKAP9	-46	181	207	27	GGTTGAGGGGTGGTTGGGGATAGAAAG	0.982151	-52.6785	0.555556	1	1	1	1	1	1	5	1	1	0	13	1	B1	GTCACCTATGCTGGGTTCGCGTGTA	14	1	B2	AGCAGTTAGATCCACTCCCTGAGGT	GTCACCTATGCTGGGTTCGCGTGTATTACACTCGGACCTCGTCGACATGCATTGGTTGAGGGGTGGTTGGGGATAGAAAGCCTCCTAAGTTTCGAGCTGGACTCAGTGAGCAGTTAGATCCACTCCCTGAGGT	GTCACCTATGCTGGGTTCGCGTGTATTACACTCGGACCTCGTCGACATGCATTGGTTGAGGGGTGGTTGGGGATAGAAAGCCTCCTAAGTTTCGAGCTGGACTCAGTGAGCAGTTAGATCCACTCCCTGAGGTCTCAATCCACT
ENST00000356239	ENSG00000127914	AKAP9	set16	ENSG00000127914	AKAP9	-46	8835	8863	29	TATCACTGCCTTCAAGGTACCACATTCCT	0.957849	-52.9785	0.448276	1	1	1	1	1	1	5	1	1	0	13	1	B1	GTCACCTATGCTGGGTTCGCGTGTA	14	1	B2	AGCAGTTAGATCCACTCCCTGAGGT	GTCACCTATGCTGGGTTCGCGTGTATTACACTCGGACCTCGTCGACATGCATTTATCACTGCCTTCAAGGTACCACATTCCTCCTCCTAAGTTTCGAGCTGGACTCAGTGAGCAGTTAGATCCACTCCCTGAGGT	GTCACCTATGCTGGGTTCGCGTGTATTACACTCGGACCTCGTCGACATGCATTTATCACTGCCTTCAAGGTACCACATTCCTCCTCCTAAGTTTCGAGCTGGACTCAGTGAGCAGTTAGATCCACTCCCTGAGGTTTTCGTAGA
ENST00000356239	ENSG00000127914	AKAP9	set16	ENSG00000127914	AKAP9	-46	8664	8695	32	TTCAGTAACTTCTTCTGAGGAACATTCACTCT	0.927849	-54.0785	0.375	1	1	1	1	1	1	5	1	1	0	13	1	B1	GTCACCTATGCTGGGTTCGCGTGTA	14	1	B2	AGCAGTTAGATCCACTCCCTGAGGT	GTCACCTATGCTGGGTTCGCGTGTATTACACTCGGACCTCGTCGACATGCATTTTCAGTAACTTCTTCTGAGGAACATTCACTCTCCTCCTAAGTTTCGAGCTGGACTCAGTGAGCAGTTAGATCCACTCCCTGAGGT	GTCACCTATGCTGGGTTCGCGTGTATTACACTCGGACCTCGTCGACATGCATTTTCAGTAACTTCTTCTGAGGAACATTCACTCTCCTCCTAAGTTTCGAGCTGGACTCAGTGAGCAGTTAGATCCACTCCCTGAGGTAGTTAC
ENST00000356239	ENSG00000127914	AKAP9	set16	ENSG00000127914	AKAP9	-46	8254	8287	34	TTCATTGCTATGAAATAGCTCAGTAGTTGTCTTG	0.987849	-54.8785	0.352941	1	1	1	1	1	1	5	1	1	0	13	1	B1	GTCACCTATGCTGGGTTCGCGTGTA	14	1	B2	AGCAGTTAGATCCACTCCCTGAGGT	GTCACCTATGCTGGGTTCGCGTGTATTACACTCGGACCTCGTCGACATGCATTTTCATTGCTATGAAATAGCTCAGTAGTTGTCTTGCCTCCTAAGTTTCGAGCTGGACTCAGTGAGCAGTTAGATCCACTCCCTGAGGT	GTCACCTATGCTGGGTTCGCGTGTATTACACTCGGACCTCGTCGACATGCATTTTCATTGCTATGAAATAGCTCAGTAGTTGTCTTGCCTCCTAAGTTTCGAGCTGGACTCAGTGAGCAGTTAGATCCACTCCCTGAGGTACCT
ENST00000356239	ENSG00000127914	AKAP9	set16	ENSG00000127914	AKAP9	-46	7756	7786	31	GGTAAGTTCTAAGTCCTTTGCACTAACAGTG	0.857849	-52.6785	0.419355	1	1	1	1	1	1	5	1	1	0	13	1	B1	GTCACCTATGCTGGGTTCGCGTGTA	14	1	B2	AGCAGTTAGATCCACTCCCTGAGGT	GTCACCTATGCTGGGTTCGCGTGTATTACACTCGGACCTCGTCGACATGCATTGGTAAGTTCTAAGTCCTTTGCACTAACAGTGCCTCCTAAGTTTCGAGCTGGACTCAGTGAGCAGTTAGATCCACTCCCTGAGGT	GTCACCTATGCTGGGTTCGCGTGTATTACACTCGGACCTCGTCGACATGCATTGGTAAGTTCTAAGTCCTTTGCACTAACAGTGCCTCCTAAGTTTCGAGCTGGACTCAGTGAGCAGTTAGATCCACTCCCTGAGGTCGACGAA
ENST00000356239	ENSG00000127914	AKAP9	set16	ENSG00000127914	AKAP9	-46	11695	11726	32	TAGTATGTCTTGGTTCTCCATATAACTCCAGC	0.912151	-55.3785	0.40625	1	1	1	0	1	1	4	1	1	0	13	1	B1	GTCACCTATGCTGGGTTCGCGTGTA	14	1	B2	AGCAGTTAGATCCACTCCCTGAGGT	GTCACCTATGCTGGGTTCGCGTGTATTACACTCGGACCTCGTCGACATGCATTTAGTATGTCTTGGTTCTCCATATAACTCCAGCCCTCCTAAGTTTCGAGCTGGACTCAGTGAGCAGTTAGATCCACTCCCTGAGGT	GTCACCTATGCTGGGTTCGCGTGTATTACACTCGGACCTCGTCGACATGCATTTAGTATGTCTTGGTTCTCCATATAACTCCAGCCCTCCTAAGTTTCGAGCTGGACTCAGTGAGCAGTTAGATCCACTCCCTGAGGTGGCCCT
ENST00000356239	ENSG00000127914	AKAP9	set16	ENSG00000127914	AKAP9	-46	7402	7430	29	AGGCCAGCTTTTCAGCTATAACCACATCC	0.942151	-54.0785	0.482759	1	1	1	1	1	1	5	1	1	0	13	1	B1	GTCACCTATGCTGGGTTCGCGTGTA	14	1	B2	AGCAGTTAGATCCACTCCCTGAGGT	GTCACCTATGCTGGGTTCGCGTGTATTACACTCGGACCTCGTCGACATGCATTAGGCCAGCTTTTCAGCTATAACCACATCCCCTCCTAAGTTTCGAGCTGGACTCAGTGAGCAGTTAGATCCACTCCCTGAGGT	GTCACCTATGCTGGGTTCGCGTGTATTACACTCGGACCTCGTCGACATGCATTAGGCCAGCTTTTCAGCTATAACCACATCCCCTCCTAAGTTTCGAGCTGGACTCAGTGAGCAGTTAGATCCACTCCCTGAGGTGCGTAAGGT
ENST00000356239	ENSG00000127914	AKAP9	set16	ENSG00000127914	AKAP9	-46	7333	7365	33	GAATGAGCATTCATTGATGTCTTCTGTCCAATA	0.997849	-54.5785	0.363636	1	1	1	1	1	1	5	1	1	0	13	1	B1	GTCACCTATGCTGGGTTCGCGTGTA	14	1	B2	AGCAGTTAGATCCACTCCCTGAGGT	GTCACCTATGCTGGGTTCGCGTGTATTACACTCGGACCTCGTCGACATGCATTGAATGAGCATTCATTGATGTCTTCTGTCCAATACCTCCTAAGTTTCGAGCTGGACTCAGTGAGCAGTTAGATCCACTCCCTGAGGT	GTCACCTATGCTGGGTTCGCGTGTATTACACTCGGACCTCGTCGACATGCATTGAATGAGCATTCATTGATGTCTTCTGTCCAATACCTCCTAAGTTTCGAGCTGGACTCAGTGAGCAGTTAGATCCACTCCCTGAGGTGTGGG
ENST00000356239	ENSG00000127914	AKAP9	set16	ENSG00000127914	AKAP9	-46	11159	11186	28	AGGCAATGATGGCTTCAATGTTGGCACC	0.972151	-53.0785	0.5	1	1	1	1	1	1	5	1	1	0	13	1	B1	GTCACCTATGCTGGGTTCGCGTGTA	14	1	B2	AGCAGTTAGATCCACTCCCTGAGGT	GTCACCTATGCTGGGTTCGCGTGTATTACACTCGGACCTCGTCGACATGCATTAGGCAATGATGGCTTCAATGTTGGCACCCCTCCTAAGTTTCGAGCTGGACTCAGTGAGCAGTTAGATCCACTCCCTGAGGT	GTCACCTATGCTGGGTTCGCGTGTATTACACTCGGACCTCGTCGACATGCATTAGGCAATGATGGCTTCAATGTTGGCACCCCTCCTAAGTTTCGAGCTGGACTCAGTGAGCAGTTAGATCCACTCCCTGAGGTATCATATTTG
ENST00000356239	ENSG00000127914	AKAP9	set16	ENSG00000127914	AKAP9	-46	10343	10375	33	TTGCTGTCGTGTTTGCAAAGAATCCAGTTTATA	0.997849	-54.2785	0.363636	1	1	1	1	1	1	5	1	1	0	13	1	B1	GTCACCTATGCTGGGTTCGCGTGTA	14	1	B2	AGCAGTTAGATCCACTCCCTGAGGT	GTCACCTATGCTGGGTTCGCGTGTATTACACTCGGACCTCGTCGACATGCATTTTGCTGTCGTGTTTGCAAAGAATCCAGTTTATACCTCCTAAGTTTCGAGCTGGACTCAGTGAGCAGTTAGATCCACTCCCTGAGGT	GTCACCTATGCTGGGTTCGCGTGTATTACACTCGGACCTCGTCGACATGCATTTTGCTGTCGTGTTTGCAAAGAATCCAGTTTATACCTCCTAAGTTTCGAGCTGGACTCAGTGAGCAGTTAGATCCACTCCCTGAGGTTCGGC
ENST00000356239	ENSG00000127914	AKAP9	set16	ENSG00000127914	AKAP9	-46	11096	11122	27	AGCTCCTGTCTGTCGATACCACCTGAT	0.937849	-52.7785	0.518519	1	1	1	0	1	1	4	1	1	0	13	1	B1	GTCACCTATGCTGGGTTCGCGTGTA	14	1	B2	AGCAGTTAGATCCACTCCCTGAGGT	GTCACCTATGCTGGGTTCGCGTGTATTACACTCGGACCTCGTCGACATGCATTAGCTCCTGTCTGTCGATACCACCTGATCCTCCTAAGTTTCGAGCTGGACTCAGTGAGCAGTTAGATCCACTCCCTGAGGT	GTCACCTATGCTGGGTTCGCGTGTATTACACTCGGACCTCGTCGACATGCATTAGCTCCTGTCTGTCGATACCACCTGATCCTCCTAAGTTTCGAGCTGGACTCAGTGAGCAGTTAGATCCACTCCCTGAGGTGTACAGGTGTA
ENST00000356239	ENSG00000127914	AKAP9	set16	ENSG00000127914	AKAP9	-46	11065	11094	30	TGCTCTTCCAGCTTCATAACCATGTTCCTT	0.982151	-53.9785	0.433333	1	1	1	0	1	1	4	1	1	0	13	1	B1	GTCACCTATGCTGGGTTCGCGTGTA	14	1	B2	AGCAGTTAGATCCACTCCCTGAGGT	GTCACCTATGCTGGGTTCGCGTGTATTACACTCGGACCTCGTCGACATGCATTTGCTCTTCCAGCTTCATAACCATGTTCCTTCCTCCTAAGTTTCGAGCTGGACTCAGTGAGCAGTTAGATCCACTCCCTGAGGT	GTCACCTATGCTGGGTTCGCGTGTATTACACTCGGACCTCGTCGACATGCATTTGCTCTTCCAGCTTCATAACCATGTTCCTTCCTCCTAAGTTTCGAGCTGGACTCAGTGAGCAGTTAGATCCACTCCCTGAGGTGCACTGCG
ENST00000356239	ENSG00000127914	AKAP9	set16	ENSG00000127914	AKAP9	-46	9053	9086	34	CAGCTCTCAGTAATCCCTTTATTTTCTTTGGAAA	0.977849	-54.4785	0.352941	1	1	1	1	1	1	5	1	1	0	13	1	B1	GTCACCTATGCTGGGTTCGCGTGTA	14	1	B2	AGCAGTTAGATCCACTCCCTGAGGT	GTCACCTATGCTGGGTTCGCGTGTATTACACTCGGACCTCGTCGACATGCATTCAGCTCTCAGTAATCCCTTTATTTTCTTTGGAAACCTCCTAAGTTTCGAGCTGGACTCAGTGAGCAGTTAGATCCACTCCCTGAGGT	GTCACCTATGCTGGGTTCGCGTGTATTACACTCGGACCTCGTCGACATGCATTCAGCTCTCAGTAATCCCTTTATTTTCTTTGGAAACCTCCTAAGTTTCGAGCTGGACTCAGTGAGCAGTTAGATCCACTCCCTGAGGTCCAT
ENST00000356239	ENSG00000127914	AKAP9	set16	ENSG00000127914	AKAP9	-46	8926	8956	31	TCCAGAATCACTGGAGCATATTTCTCTAGTC	0.992151	-54.6785	0.419355	1	1	1	1	1	1	5	1	1	0	13	1	B1	GTCACCTATGCTGGGTTCGCGTGTA	14	1	B2	AGCAGTTAGATCCACTCCCTGAGGT	GTCACCTATGCTGGGTTCGCGTGTATTACACTCGGACCTCGTCGACATGCATTTCCAGAATCACTGGAGCATATTTCTCTAGTCCCTCCTAAGTTTCGAGCTGGACTCAGTGAGCAGTTAGATCCACTCCCTGAGGT	GTCACCTATGCTGGGTTCGCGTGTATTACACTCGGACCTCGTCGACATGCATTTCCAGAATCACTGGAGCATATTTCTCTAGTCCCTCCTAAGTTTCGAGCTGGACTCAGTGAGCAGTTAGATCCACTCCCTGAGGTATGAGAC
ENST00000356239	ENSG00000127914	AKAP9	set16	ENSG00000127914	AKAP9	-46	7650	7682	33	ATGTCTGATTTTCTAGGGATTTAAGAGCATCCT	0.972151	-54.9785	0.363636	1	1	1	1	1	1	5	1	1	0	13	1	B1	GTCACCTATGCTGGGTTCGCGTGTA	14	1	B2	AGCAGTTAGATCCACTCCCTGAGGT	GTCACCTATGCTGGGTTCGCGTGTATTACACTCGGACCTCGTCGACATGCATTATGTCTGATTTTCTAGGGATTTAAGAGCATCCTCCTCCTAAGTTTCGAGCTGGACTCAGTGAGCAGTTAGATCCACTCCCTGAGGT	GTCACCTATGCTGGGTTCGCGTGTATTACACTCGGACCTCGTCGACATGCATTATGTCTGATTTTCTAGGGATTTAAGAGCATCCTCCTCCTAAGTTTCGAGCTGGACTCAGTGAGCAGTTAGATCCACTCCCTGAGGTAATAG
ENST00000356239	ENSG00000127914	AKAP9	set16	ENSG00000127914	AKAP9	-46	11629	11657	29	CACCTTGATTCAGTCCAAAGCCATCTCTG	0.917849	-52.6785	0.482759	1	1	1	1	1	1	5	1	1	0	13	1	B1	GTCACCTATGCTGGGTTCGCGTGTA	14	1	B2	AGCAGTTAGATCCACTCCCTGAGGT	GTCACCTATGCTGGGTTCGCGTGTATTACACTCGGACCTCGTCGACATGCATTCACCTTGATTCAGTCCAAAGCCATCTCTGCCTCCTAAGTTTCGAGCTGGACTCAGTGAGCAGTTAGATCCACTCCCTGAGGT	GTCACCTATGCTGGGTTCGCGTGTATTACACTCGGACCTCGTCGACATGCATTCACCTTGATTCAGTCCAAAGCCATCTCTGCCTCCTAAGTTTCGAGCTGGACTCAGTGAGCAGTTAGATCCACTCCCTGAGGTCGTCTATAA
ENST00000356239	ENSG00000127914	AKAP9	set16	ENSG00000127914	AKAP9	-46	10220	10246	27	CCGAGACTGTCCAGTACCATCACTGCT	0.982151	-53.4785	0.555556	1	1	1	1	1	1	5	1	1	0	13	1	B1	GTCACCTATGCTGGGTTCGCGTGTA	14	1	B2	AGCAGTTAGATCCACTCCCTGAGGT	GTCACCTATGCTGGGTTCGCGTGTATTACACTCGGACCTCGTCGACATGCATTCCGAGACTGTCCAGTACCATCACTGCTCCTCCTAAGTTTCGAGCTGGACTCAGTGAGCAGTTAGATCCACTCCCTGAGGT	GTCACCTATGCTGGGTTCGCGTGTATTACACTCGGACCTCGTCGACATGCATTCCGAGACTGTCCAGTACCATCACTGCTCCTCCTAAGTTTCGAGCTGGACTCAGTGAGCAGTTAGATCCACTCCCTGAGGTCCGGCCATAGG
ENST00000356239	ENSG00000127914	AKAP9	set16	ENSG00000127914	AKAP9	-46	7047	7076	30	ATAGCACATGTTGGTCTTGAGTAGACATGG	0.917849	-52.8785	0.433333	1	1	1	1	1	1	5	1	1	0	13	1	B1	GTCACCTATGCTGGGTTCGCGTGTA	14	1	B2	AGCAGTTAGATCCACTCCCTGAGGT	GTCACCTATGCTGGGTTCGCGTGTATTACACTCGGACCTCGTCGACATGCATTATAGCACATGTTGGTCTTGAGTAGACATGGCCTCCTAAGTTTCGAGCTGGACTCAGTGAGCAGTTAGATCCACTCCCTGAGGT	GTCACCTATGCTGGGTTCGCGTGTATTACACTCGGACCTCGTCGACATGCATTATAGCACATGTTGGTCTTGAGTAGACATGGCCTCCTAAGTTTCGAGCTGGACTCAGTGAGCAGTTAGATCCACTCCCTGAGGTCGTCCGGT
ENST00000356239	ENSG00000127914	AKAP9	set16	ENSG00000127914	AKAP9	-46	7015	7045	31	ATCAGATTCCTTTATGGCAAGTCCCAGTTTC	0.982151	-54.0785	0.419355	1	1	1	1	1	1	5	1	1	0	13	1	B1	GTCACCTATGCTGGGTTCGCGTGTA	14	1	B2	AGCAGTTAGATCCACTCCCTGAGGT	GTCACCTATGCTGGGTTCGCGTGTATTACACTCGGACCTCGTCGACATGCATTATCAGATTCCTTTATGGCAAGTCCCAGTTTCCCTCCTAAGTTTCGAGCTGGACTCAGTGAGCAGTTAGATCCACTCCCTGAGGT	GTCACCTATGCTGGGTTCGCGTGTATTACACTCGGACCTCGTCGACATGCATTATCAGATTCCTTTATGGCAAGTCCCAGTTTCCCTCCTAAGTTTCGAGCTGGACTCAGTGAGCAGTTAGATCCACTCCCTGAGGTTTTGATT
ENST00000356239	ENSG00000127914	AKAP9	set16	ENSG00000127914	AKAP9	-46	11507	11533	27	AAACCTGGTGAAGCCCTTTGGGCGATT	0.947849	-51.9785	0.518519	1	1	1	1	1	1	5	1	1	0	13	1	B1	GTCACCTATGCTGGGTTCGCGTGTA	14	1	B2	AGCAGTTAGATCCACTCCCTGAGGT	GTCACCTATGCTGGGTTCGCGTGTATTACACTCGGACCTCGTCGACATGCATTAAACCTGGTGAAGCCCTTTGGGCGATTCCTCCTAAGTTTCGAGCTGGACTCAGTGAGCAGTTAGATCCACTCCCTGAGGT	GTCACCTATGCTGGGTTCGCGTGTATTACACTCGGACCTCGTCGACATGCATTAAACCTGGTGAAGCCCTTTGGGCGATTCCTCCTAAGTTTCGAGCTGGACTCAGTGAGCAGTTAGATCCACTCCCTGAGGTCAGGCGCTACA
ENST00000356239	ENSG00000127914	AKAP9	set16	ENSG00000127914	AKAP9	-46	10162	10192	31	CCTATCTAGGGTACTACTCATTTCCCGAATT	0.917849	-53.1785	0.419355	1	1	1	1	1	1	5	1	1	0	13	1	B1	GTCACCTATGCTGGGTTCGCGTGTA	14	1	B2	AGCAGTTAGATCCACTCCCTGAGGT	GTCACCTATGCTGGGTTCGCGTGTATTACACTCGGACCTCGTCGACATGCATTCCTATCTAGGGTACTACTCATTTCCCGAATTCCTCCTAAGTTTCGAGCTGGACTCAGTGAGCAGTTAGATCCACTCCCTGAGGT	GTCACCTATGCTGGGTTCGCGTGTATTACACTCGGACCTCGTCGACATGCATTCCTATCTAGGGTACTACTCATTTCCCGAATTCCTCCTAAGTTTCGAGCTGGACTCAGTGAGCAGTTAGATCCACTCCCTGAGGTGTTCCAT
ENST00000357681	ENSG00000058668	ATP2B4	set16	ENSG00000058668	ATP2B4	-46	5611	5641	31	AGGTTTTCTCAGATCATGCTAGAATGGCTCT	0.932151	-55.1785	0.419355	1	1	1	1	1	1	5	1	1	0	15	1	B3	ACAGTGTCGTGGCTCCTCTCCAATC	16	1	B4	TCCGGATCATCTTTCCCTGTTCAGC	ACAGTGTCGTGGCTCCTCTCCAATCTTACACTCGGACCTCGTCGACATGCATTAGGTTTTCTCAGATCATGCTAGAATGGCTCTCCTCCTAAGTTTCGAGCTGGACTCAGTGTCCGGATCATCTTTCCCTGTTCAGC	ACAGTGTCGTGGCTCCTCTCCAATCTTACACTCGGACCTCGTCGACATGCATTAGGTTTTCTCAGATCATGCTAGAATGGCTCTCCTCCTAAGTTTCGAGCTGGACTCAGTGTCCGGATCATCTTTCCCTGTTCAGCGATTCAG
ENST00000357681	ENSG00000058668	ATP2B4	set16	ENSG00000058668	ATP2B4	-46	6144	6171	28	TGACTCTCATCACTCTAGAAAGGGGGGT	0.942151	-54.1785	0.5	1	1	1	1	1	1	5	1	1	0	15	1	B3	ACAGTGTCGTGGCTCCTCTCCAATC	16	1	B4	TCCGGATCATCTTTCCCTGTTCAGC	ACAGTGTCGTGGCTCCTCTCCAATCTTACACTCGGACCTCGTCGACATGCATTTGACTCTCATCACTCTAGAAAGGGGGGTCCTCCTAAGTTTCGAGCTGGACTCAGTGTCCGGATCATCTTTCCCTGTTCAGC	ACAGTGTCGTGGCTCCTCTCCAATCTTACACTCGGACCTCGTCGACATGCATTTGACTCTCATCACTCTAGAAAGGGGGGTCCTCCTAAGTTTCGAGCTGGACTCAGTGTCCGGATCATCTTTCCCTGTTCAGCGATGTTCTAT
ENST00000357681	ENSG00000058668	ATP2B4	set16	ENSG00000058668	ATP2B4	-46	6113	6142	30	GGCTTCATTTATCTAATGGGAGGTGAGAGT	0.937849	-53.2785	0.433333	1	1	1	1	1	1	5	1	1	0	15	1	B3	ACAGTGTCGTGGCTCCTCTCCAATC	16	1	B4	TCCGGATCATCTTTCCCTGTTCAGC	ACAGTGTCGTGGCTCCTCTCCAATCTTACACTCGGACCTCGTCGACATGCATTGGCTTCATTTATCTAATGGGAGGTGAGAGTCCTCCTAAGTTTCGAGCTGGACTCAGTGTCCGGATCATCTTTCCCTGTTCAGC	ACAGTGTCGTGGCTCCTCTCCAATCTTACACTCGGACCTCGTCGACATGCATTGGCTTCATTTATCTAATGGGAGGTGAGAGTCCTCCTAAGTTTCGAGCTGGACTCAGTGTCCGGATCATCTTTCCCTGTTCAGCTTAGAGGG
ENST00000357681	ENSG00000058668	ATP2B4	set16	ENSG00000058668	ATP2B4	-46	4688	4717	30	AGTAGATTCTACCATGACCTGAATGGGGTT	0.972151	-53.8785	0.433333	1	1	1	1	1	1	5	1	1	0	15	1	B3	ACAGTGTCGTGGCTCCTCTCCAATC	16	1	B4	TCCGGATCATCTTTCCCTGTTCAGC	ACAGTGTCGTGGCTCCTCTCCAATCTTACACTCGGACCTCGTCGACATGCATTAGTAGATTCTACCATGACCTGAATGGGGTTCCTCCTAAGTTTCGAGCTGGACTCAGTGTCCGGATCATCTTTCCCTGTTCAGC	ACAGTGTCGTGGCTCCTCTCCAATCTTACACTCGGACCTCGTCGACATGCATTAGTAGATTCTACCATGACCTGAATGGGGTTCCTCCTAAGTTTCGAGCTGGACTCAGTGTCCGGATCATCTTTCCCTGTTCAGCATGGAAAC
ENST00000357681	ENSG00000058668	ATP2B4	set16	ENSG00000058668	ATP2B4	-46	5530	5556	27	TGGAGAGCCTTGGCAGATGGCTTTGAA	0.992151	-53.1785	0.518519	1	1	1	1	1	1	5	1	1	0	15	1	B3	ACAGTGTCGTGGCTCCTCTCCAATC	16	1	B4	TCCGGATCATCTTTCCCTGTTCAGC	ACAGTGTCGTGGCTCCTCTCCAATCTTACACTCGGACCTCGTCGACATGCATTTGGAGAGCCTTGGCAGATGGCTTTGAACCTCCTAAGTTTCGAGCTGGACTCAGTGTCCGGATCATCTTTCCCTGTTCAGC	ACAGTGTCGTGGCTCCTCTCCAATCTTACACTCGGACCTCGTCGACATGCATTTGGAGAGCCTTGGCAGATGGCTTTGAACCTCCTAAGTTTCGAGCTGGACTCAGTGTCCGGATCATCTTTCCCTGTTCAGCGCATGTTGCAG
ENST00000357681	ENSG00000058668	ATP2B4	set16	ENSG00000058668	ATP2B4	-46	8666	8697	32	TTACAAGTGGGCATGAGTTTTTATTCTCAGTG	0.857849	-52.5785	0.375	1	1	1	0	1	1	4	1	1	0	15	1	B3	ACAGTGTCGTGGCTCCTCTCCAATC	16	1	B4	TCCGGATCATCTTTCCCTGTTCAGC	ACAGTGTCGTGGCTCCTCTCCAATCTTACACTCGGACCTCGTCGACATGCATTTTACAAGTGGGCATGAGTTTTTATTCTCAGTGCCTCCTAAGTTTCGAGCTGGACTCAGTGTCCGGATCATCTTTCCCTGTTCAGC	ACAGTGTCGTGGCTCCTCTCCAATCTTACACTCGGACCTCGTCGACATGCATTTTACAAGTGGGCATGAGTTTTTATTCTCAGTGCCTCCTAAGTTTCGAGCTGGACTCAGTGTCCGGATCATCTTTCCCTGTTCAGCATTGTT
ENST00000357681	ENSG00000058668	ATP2B4	set16	ENSG00000058668	ATP2B4	-46	8567	8595	29	TCCTCTTCTTCTTCTGGTCTCAGTGGAAC	0.972151	-54.4785	0.482759	1	1	1	0	1	1	4	1	1	0	15	1	B3	ACAGTGTCGTGGCTCCTCTCCAATC	16	1	B4	TCCGGATCATCTTTCCCTGTTCAGC	ACAGTGTCGTGGCTCCTCTCCAATCTTACACTCGGACCTCGTCGACATGCATTTCCTCTTCTTCTTCTGGTCTCAGTGGAACCCTCCTAAGTTTCGAGCTGGACTCAGTGTCCGGATCATCTTTCCCTGTTCAGC	ACAGTGTCGTGGCTCCTCTCCAATCTTACACTCGGACCTCGTCGACATGCATTTCCTCTTCTTCTTCTGGTCTCAGTGGAACCCTCCTAAGTTTCGAGCTGGACTCAGTGTCCGGATCATCTTTCCCTGTTCAGCTCATGGTTT
ENST00000357681	ENSG00000058668	ATP2B4	set16	ENSG00000058668	ATP2B4	-46	8099	8128	30	CATCTCCTTCCATCTCTCCTAATCAAGAGC	0.992151	-54.4785	0.466667	1	1	1	1	1	0	4	1	1	0	15	1	B3	ACAGTGTCGTGGCTCCTCTCCAATC	16	1	B4	TCCGGATCATCTTTCCCTGTTCAGC	ACAGTGTCGTGGCTCCTCTCCAATCTTACACTCGGACCTCGTCGACATGCATTCATCTCCTTCCATCTCTCCTAATCAAGAGCCCTCCTAAGTTTCGAGCTGGACTCAGTGTCCGGATCATCTTTCCCTGTTCAGC	ACAGTGTCGTGGCTCCTCTCCAATCTTACACTCGGACCTCGTCGACATGCATTCATCTCCTTCCATCTCTCCTAATCAAGAGCCCTCCTAAGTTTCGAGCTGGACTCAGTGTCCGGATCATCTTTCCCTGTTCAGCTGTTTATA
ENST00000357681	ENSG00000058668	ATP2B4	set16	ENSG00000058668	ATP2B4	-46	7242	7267	26	GGGGGTTGGGGGGAAGATTCATTTCC	0.992151	-52.0785	0.576923	1	1	1	0	1	1	4	1	1	0	15	1	B3	ACAGTGTCGTGGCTCCTCTCCAATC	16	1	B4	TCCGGATCATCTTTCCCTGTTCAGC	ACAGTGTCGTGGCTCCTCTCCAATCTTACACTCGGACCTCGTCGACATGCATTGGGGGTTGGGGGGAAGATTCATTTCCCCTCCTAAGTTTCGAGCTGGACTCAGTGTCCGGATCATCTTTCCCTGTTCAGC	ACAGTGTCGTGGCTCCTCTCCAATCTTACACTCGGACCTCGTCGACATGCATTGGGGGTTGGGGGGAAGATTCATTTCCCCTCCTAAGTTTCGAGCTGGACTCAGTGTCCGGATCATCTTTCCCTGTTCAGCTGCGGACTTTAA
ENST00000357681	ENSG00000058668	ATP2B4	set16	ENSG00000058668	ATP2B4	-46	7216	7240	25	GACAGCTGTGTCCCTTGCTGGGTGT	0.967849	-52.1785	0.6	1	1	1	0	1	1	4	1	1	0	15	1	B3	ACAGTGTCGTGGCTCCTCTCCAATC	16	1	B4	TCCGGATCATCTTTCCCTGTTCAGC	ACAGTGTCGTGGCTCCTCTCCAATCTTACACTCGGACCTCGTCGACATGCATTGACAGCTGTGTCCCTTGCTGGGTGTCCTCCTAAGTTTCGAGCTGGACTCAGTGTCCGGATCATCTTTCCCTGTTCAGC	ACAGTGTCGTGGCTCCTCTCCAATCTTACACTCGGACCTCGTCGACATGCATTGACAGCTGTGTCCCTTGCTGGGTGTCCTCCTAAGTTTCGAGCTGGACTCAGTGTCCGGATCATCTTTCCCTGTTCAGCCCCCTAGGGTATC
ENST00000357681	ENSG00000058668	ATP2B4	set16	ENSG00000058668	ATP2B4	-46	7184	7214	31	TTCCTGACTATCCACAGTTTACTACCCGTTT	0.972151	-54.1785	0.419355	1	1	1	0	1	1	4	1	1	0	15	1	B3	ACAGTGTCGTGGCTCCTCTCCAATC	16	1	B4	TCCGGATCATCTTTCCCTGTTCAGC	ACAGTGTCGTGGCTCCTCTCCAATCTTACACTCGGACCTCGTCGACATGCATTTTCCTGACTATCCACAGTTTACTACCCGTTTCCTCCTAAGTTTCGAGCTGGACTCAGTGTCCGGATCATCTTTCCCTGTTCAGC	ACAGTGTCGTGGCTCCTCTCCAATCTTACACTCGGACCTCGTCGACATGCATTTTCCTGACTATCCACAGTTTACTACCCGTTTCCTCCTAAGTTTCGAGCTGGACTCAGTGTCCGGATCATCTTTCCCTGTTCAGCTTTCTAA
ENST00000357681	ENSG00000058668	ATP2B4	set16	ENSG00000058668	ATP2B4	-46	4877	4906	30	ATCTCTACCGCAACATATTTCACTTGGGGA	0.987849	-53.4785	0.433333	1	1	1	1	1	1	5	1	1	0	15	1	B3	ACAGTGTCGTGGCTCCTCTCCAATC	16	1	B4	TCCGGATCATCTTTCCCTGTTCAGC	ACAGTGTCGTGGCTCCTCTCCAATCTTACACTCGGACCTCGTCGACATGCATTATCTCTACCGCAACATATTTCACTTGGGGACCTCCTAAGTTTCGAGCTGGACTCAGTGTCCGGATCATCTTTCCCTGTTCAGC	ACAGTGTCGTGGCTCCTCTCCAATCTTACACTCGGACCTCGTCGACATGCATTATCTCTACCGCAACATATTTCACTTGGGGACCTCCTAAGTTTCGAGCTGGACTCAGTGTCCGGATCATCTTTCCCTGTTCAGCGGACAAGT
ENST00000357681	ENSG00000058668	ATP2B4	set16	ENSG00000058668	ATP2B4	-46	4599	4626	28	TCTTGCCTCTTCATGGTCAGGTAGAGGT	0.942151	-54.1785	0.5	1	1	1	0	1	1	4	1	1	0	15	1	B3	ACAGTGTCGTGGCTCCTCTCCAATC	16	1	B4	TCCGGATCATCTTTCCCTGTTCAGC	ACAGTGTCGTGGCTCCTCTCCAATCTTACACTCGGACCTCGTCGACATGCATTTCTTGCCTCTTCATGGTCAGGTAGAGGTCCTCCTAAGTTTCGAGCTGGACTCAGTGTCCGGATCATCTTTCCCTGTTCAGC	ACAGTGTCGTGGCTCCTCTCCAATCTTACACTCGGACCTCGTCGACATGCATTTCTTGCCTCTTCATGGTCAGGTAGAGGTCCTCCTAAGTTTCGAGCTGGACTCAGTGTCCGGATCATCTTTCCCTGTTCAGCTGGTACAGGC
ENST00000357681	ENSG00000058668	ATP2B4	set16	ENSG00000058668	ATP2B4	-46	6805	6830	26	GGTTATGTGCTCCCTTCCACAGGGCT	0.952151	-53.0785	0.576923	1	1	1	0	1	1	4	1	1	0	15	1	B3	ACAGTGTCGTGGCTCCTCTCCAATC	16	1	B4	TCCGGATCATCTTTCCCTGTTCAGC	ACAGTGTCGTGGCTCCTCTCCAATCTTACACTCGGACCTCGTCGACATGCATTGGTTATGTGCTCCCTTCCACAGGGCTCCTCCTAAGTTTCGAGCTGGACTCAGTGTCCGGATCATCTTTCCCTGTTCAGC	ACAGTGTCGTGGCTCCTCTCCAATCTTACACTCGGACCTCGTCGACATGCATTGGTTATGTGCTCCCTTCCACAGGGCTCCTCCTAAGTTTCGAGCTGGACTCAGTGTCCGGATCATCTTTCCCTGTTCAGCCAAAAATGAAGA
ENST00000357681	ENSG00000058668	ATP2B4	set16	ENSG00000058668	ATP2B4	-46	6203	6230	28	GTGGATCAGGTCATCTTCCTCTCACATG	0.897849	-52.4785	0.5	1	1	1	0	1	1	4	1	1	0	15	1	B3	ACAGTGTCGTGGCTCCTCTCCAATC	16	1	B4	TCCGGATCATCTTTCCCTGTTCAGC	ACAGTGTCGTGGCTCCTCTCCAATCTTACACTCGGACCTCGTCGACATGCATTGTGGATCAGGTCATCTTCCTCTCACATGCCTCCTAAGTTTCGAGCTGGACTCAGTGTCCGGATCATCTTTCCCTGTTCAGC	ACAGTGTCGTGGCTCCTCTCCAATCTTACACTCGGACCTCGTCGACATGCATTGTGGATCAGGTCATCTTCCTCTCACATGCCTCCTAAGTTTCGAGCTGGACTCAGTGTCCGGATCATCTTTCCCTGTTCAGCCCGCAGTAGG
ENST00000357681	ENSG00000058668	ATP2B4	set16	ENSG00000058668	ATP2B4	-46	7805	7831	27	GCTTTTCCACACAAGCGAGTGTGCCAC	0.977849	-52.7785	0.555556	1	1	1	1	1	1	5	1	1	0	15	1	B3	ACAGTGTCGTGGCTCCTCTCCAATC	16	1	B4	TCCGGATCATCTTTCCCTGTTCAGC	ACAGTGTCGTGGCTCCTCTCCAATCTTACACTCGGACCTCGTCGACATGCATTGCTTTTCCACACAAGCGAGTGTGCCACCCTCCTAAGTTTCGAGCTGGACTCAGTGTCCGGATCATCTTTCCCTGTTCAGC	ACAGTGTCGTGGCTCCTCTCCAATCTTACACTCGGACCTCGTCGACATGCATTGCTTTTCCACACAAGCGAGTGTGCCACCCTCCTAAGTTTCGAGCTGGACTCAGTGTCCGGATCATCTTTCCCTGTTCAGCGGCAGCCAGCG
ENST00000357681	ENSG00000058668	ATP2B4	set16	ENSG00000058668	ATP2B4	-46	367	397	31	ACTGGATCTCTCTCTTTCTAGCAAAGATCCA	0.942151	-55.3785	0.419355	1	1	1	1	1	1	5	1	1	0	15	1	B3	ACAGTGTCGTGGCTCCTCTCCAATC	16	1	B4	TCCGGATCATCTTTCCCTGTTCAGC	ACAGTGTCGTGGCTCCTCTCCAATCTTACACTCGGACCTCGTCGACATGCATTACTGGATCTCTCTCTTTCTAGCAAAGATCCACCTCCTAAGTTTCGAGCTGGACTCAGTGTCCGGATCATCTTTCCCTGTTCAGC	ACAGTGTCGTGGCTCCTCTCCAATCTTACACTCGGACCTCGTCGACATGCATTACTGGATCTCTCTCTTTCTAGCAAAGATCCACCTCCTAAGTTTCGAGCTGGACTCAGTGTCCGGATCATCTTTCCCTGTTCAGCGCAGTGG
ENST00000357681	ENSG00000058668	ATP2B4	set16	ENSG00000058668	ATP2B4	-46	261	286	26	GTGGCAACCAAGCTAGAGACGCTGGC	0.912151	-53.9785	0.615385	1	1	1	1	1	1	5	1	1	0	15	1	B3	ACAGTGTCGTGGCTCCTCTCCAATC	16	1	B4	TCCGGATCATCTTTCCCTGTTCAGC	ACAGTGTCGTGGCTCCTCTCCAATCTTACACTCGGACCTCGTCGACATGCATTGTGGCAACCAAGCTAGAGACGCTGGCCCTCCTAAGTTTCGAGCTGGACTCAGTGTCCGGATCATCTTTCCCTGTTCAGC	ACAGTGTCGTGGCTCCTCTCCAATCTTACACTCGGACCTCGTCGACATGCATTGTGGCAACCAAGCTAGAGACGCTGGCCCTCCTAAGTTTCGAGCTGGACTCAGTGTCCGGATCATCTTTCCCTGTTCAGCATGCTGTAATAT
ENST00000357681	ENSG00000058668	ATP2B4	set16	ENSG00000058668	ATP2B4	-46	4178	4206	29	AATGCTTTCGTGGAGGGAACTATGGAACG	0.927849	-52.5785	0.482759	1	1	1	1	1	1	5	1	1	0	15	1	B3	ACAGTGTCGTGGCTCCTCTCCAATC	16	1	B4	TCCGGATCATCTTTCCCTGTTCAGC	ACAGTGTCGTGGCTCCTCTCCAATCTTACACTCGGACCTCGTCGACATGCATTAATGCTTTCGTGGAGGGAACTATGGAACGCCTCCTAAGTTTCGAGCTGGACTCAGTGTCCGGATCATCTTTCCCTGTTCAGC	ACAGTGTCGTGGCTCCTCTCCAATCTTACACTCGGACCTCGTCGACATGCATTAATGCTTTCGTGGAGGGAACTATGGAACGCCTCCTAAGTTTCGAGCTGGACTCAGTGTCCGGATCATCTTTCCCTGTTCAGCGGAGGCTCG
ENST00000357681	ENSG00000058668	ATP2B4	set16	ENSG00000058668	ATP2B4	-46	3986	4012	27	GGGATCGGGTAGGTATTGCGGAGATGA	0.952151	-53.4785	0.555556	1	1	1	1	1	1	5	1	1	0	15	1	B3	ACAGTGTCGTGGCTCCTCTCCAATC	16	1	B4	TCCGGATCATCTTTCCCTGTTCAGC	ACAGTGTCGTGGCTCCTCTCCAATCTTACACTCGGACCTCGTCGACATGCATTGGGATCGGGTAGGTATTGCGGAGATGACCTCCTAAGTTTCGAGCTGGACTCAGTGTCCGGATCATCTTTCCCTGTTCAGC	ACAGTGTCGTGGCTCCTCTCCAATCTTACACTCGGACCTCGTCGACATGCATTGGGATCGGGTAGGTATTGCGGAGATGACCTCCTAAGTTTCGAGCTGGACTCAGTGTCCGGATCATCTTTCCCTGTTCAGCATGTTCAACGA
ENST00000357681	ENSG00000058668	ATP2B4	set16	ENSG00000058668	ATP2B4	-46	3533	3559	27	GCCGCTTCAACAGAGATTCCGTAGGGG	0.912151	-53.9785	0.592593	1	1	1	1	1	1	5	1	1	0	15	1	B3	ACAGTGTCGTGGCTCCTCTCCAATC	16	1	B4	TCCGGATCATCTTTCCCTGTTCAGC	ACAGTGTCGTGGCTCCTCTCCAATCTTACACTCGGACCTCGTCGACATGCATTGCCGCTTCAACAGAGATTCCGTAGGGGCCTCCTAAGTTTCGAGCTGGACTCAGTGTCCGGATCATCTTTCCCTGTTCAGC	ACAGTGTCGTGGCTCCTCTCCAATCTTACACTCGGACCTCGTCGACATGCATTGCCGCTTCAACAGAGATTCCGTAGGGGCCTCCTAAGTTTCGAGCTGGACTCAGTGTCCGGATCATCTTTCCCTGTTCAGCGTCCCATGATG
ENST00000357681	ENSG00000058668	ATP2B4	set16	ENSG00000058668	ATP2B4	-46	3506	3531	26	CTCTGTGGCCAGGGCCAATGAAGCAA	0.972151	-52.7785	0.576923	1	1	1	1	1	1	5	1	1	0	15	1	B3	ACAGTGTCGTGGCTCCTCTCCAATC	16	1	B4	TCCGGATCATCTTTCCCTGTTCAGC	ACAGTGTCGTGGCTCCTCTCCAATCTTACACTCGGACCTCGTCGACATGCATTCTCTGTGGCCAGGGCCAATGAAGCAACCTCCTAAGTTTCGAGCTGGACTCAGTGTCCGGATCATCTTTCCCTGTTCAGC	ACAGTGTCGTGGCTCCTCTCCAATCTTACACTCGGACCTCGTCGACATGCATTCTCTGTGGCCAGGGCCAATGAAGCAACCTCCTAAGTTTCGAGCTGGACTCAGTGTCCGGATCATCTTTCCCTGTTCAGCGTAATAGGTGTG
ENST00000357681	ENSG00000058668	ATP2B4	set16	ENSG00000058668	ATP2B4	-46	3445	3472	28	GCACAGCTTTCAATGGGGAATCCTGAGT	0.997849	-53.1785	0.5	1	1	1	1	1	1	5	1	1	0	15	1	B3	ACAGTGTCGTGGCTCCTCTCCAATC	16	1	B4	TCCGGATCATCTTTCCCTGTTCAGC	ACAGTGTCGTGGCTCCTCTCCAATCTTACACTCGGACCTCGTCGACATGCATTGCACAGCTTTCAATGGGGAATCCTGAGTCCTCCTAAGTTTCGAGCTGGACTCAGTGTCCGGATCATCTTTCCCTGTTCAGC	ACAGTGTCGTGGCTCCTCTCCAATCTTACACTCGGACCTCGTCGACATGCATTGCACAGCTTTCAATGGGGAATCCTGAGTCCTCCTAAGTTTCGAGCTGGACTCAGTGTCCGGATCATCTTTCCCTGTTCAGCGAGCCGGGTA
ENST00000357681	ENSG00000058668	ATP2B4	set16	ENSG00000058668	ATP2B4	-46	2896	2926	31	CAGTAATGCCAGCTTGTTTGCATTTGGCAAT	0.997849	-53.3785	0.419355	1	1	1	1	1	1	5	1	1	0	15	1	B3	ACAGTGTCGTGGCTCCTCTCCAATC	16	1	B4	TCCGGATCATCTTTCCCTGTTCAGC	ACAGTGTCGTGGCTCCTCTCCAATCTTACACTCGGACCTCGTCGACATGCATTCAGTAATGCCAGCTTGTTTGCATTTGGCAATCCTCCTAAGTTTCGAGCTGGACTCAGTGTCCGGATCATCTTTCCCTGTTCAGC	ACAGTGTCGTGGCTCCTCTCCAATCTTACACTCGGACCTCGTCGACATGCATTCAGTAATGCCAGCTTGTTTGCATTTGGCAATCCTCCTAAGTTTCGAGCTGGACTCAGTGTCCGGATCATCTTTCCCTGTTCAGCATATCCT
ENST00000357681	ENSG00000058668	ATP2B4	set16	ENSG00000058668	ATP2B4	-46	5292	5318	27	AGGCTGATCTCCCTGGCACTTAAGAAC	0.897849	-52.2785	0.518519	1	1	1	1	1	1	5	1	1	0	15	1	B3	ACAGTGTCGTGGCTCCTCTCCAATC	16	1	B4	TCCGGATCATCTTTCCCTGTTCAGC	ACAGTGTCGTGGCTCCTCTCCAATCTTACACTCGGACCTCGTCGACATGCATTAGGCTGATCTCCCTGGCACTTAAGAACCCTCCTAAGTTTCGAGCTGGACTCAGTGTCCGGATCATCTTTCCCTGTTCAGC	ACAGTGTCGTGGCTCCTCTCCAATCTTACACTCGGACCTCGTCGACATGCATTAGGCTGATCTCCCTGGCACTTAAGAACCCTCCTAAGTTTCGAGCTGGACTCAGTGTCCGGATCATCTTTCCCTGTTCAGCTCCGAACTCTT
ENST00000357681	ENSG00000058668	ATP2B4	set16	ENSG00000058668	ATP2B4	-46	8013	8042	30	CTAAGTGAAAGGGCGTCTGGTCTATTCAGA	0.972151	-54.3785	0.466667	1	1	1	1	1	1	5	1	1	0	15	1	B3	ACAGTGTCGTGGCTCCTCTCCAATC	16	1	B4	TCCGGATCATCTTTCCCTGTTCAGC	ACAGTGTCGTGGCTCCTCTCCAATCTTACACTCGGACCTCGTCGACATGCATTCTAAGTGAAAGGGCGTCTGGTCTATTCAGACCTCCTAAGTTTCGAGCTGGACTCAGTGTCCGGATCATCTTTCCCTGTTCAGC	ACAGTGTCGTGGCTCCTCTCCAATCTTACACTCGGACCTCGTCGACATGCATTCTAAGTGAAAGGGCGTCTGGTCTATTCAGACCTCCTAAGTTTCGAGCTGGACTCAGTGTCCGGATCATCTTTCCCTGTTCAGCTTAGCCTG
ENST00000357681	ENSG00000058668	ATP2B4	set16	ENSG00000058668	ATP2B4	-46	4439	4466	28	ACTGATGTCTCTAGGCTCTGTAGAGAGC	0.937849	-53.7785	0.5	1	1	1	0	1	1	4	1	1	0	15	1	B3	ACAGTGTCGTGGCTCCTCTCCAATC	16	1	B4	TCCGGATCATCTTTCCCTGTTCAGC	ACAGTGTCGTGGCTCCTCTCCAATCTTACACTCGGACCTCGTCGACATGCATTACTGATGTCTCTAGGCTCTGTAGAGAGCCCTCCTAAGTTTCGAGCTGGACTCAGTGTCCGGATCATCTTTCCCTGTTCAGC	ACAGTGTCGTGGCTCCTCTCCAATCTTACACTCGGACCTCGTCGACATGCATTACTGATGTCTCTAGGCTCTGTAGAGAGCCCTCCTAAGTTTCGAGCTGGACTCAGTGTCCGGATCATCTTTCCCTGTTCAGCGCAATGATCA
ENST00000357681	ENSG00000058668	ATP2B4	set16	ENSG00000058668	ATP2B4	-46	4382	4412	31	TTGCAATCCACCGCATTGTTGTTTGTATTGG	0.977849	-52.8785	0.419355	1	1	1	0	1	1	4	1	1	0	15	1	B3	ACAGTGTCGTGGCTCCTCTCCAATC	16	1	B4	TCCGGATCATCTTTCCCTGTTCAGC	ACAGTGTCGTGGCTCCTCTCCAATCTTACACTCGGACCTCGTCGACATGCATTTTGCAATCCACCGCATTGTTGTTTGTATTGGCCTCCTAAGTTTCGAGCTGGACTCAGTGTCCGGATCATCTTTCCCTGTTCAGC	ACAGTGTCGTGGCTCCTCTCCAATCTTACACTCGGACCTCGTCGACATGCATTTTGCAATCCACCGCATTGTTGTTTGTATTGGCCTCCTAAGTTTCGAGCTGGACTCAGTGTCCGGATCATCTTTCCCTGTTCAGCAGACCCC
ENST00000357681	ENSG00000058668	ATP2B4	set16	ENSG00000058668	ATP2B4	-46	6029	6054	26	TCCTGCAAACGTGGCTCCACGTTGTC	0.947849	-52.1785	0.576923	1	1	1	0	1	1	4	1	1	0	15	1	B3	ACAGTGTCGTGGCTCCTCTCCAATC	16	1	B4	TCCGGATCATCTTTCCCTGTTCAGC	ACAGTGTCGTGGCTCCTCTCCAATCTTACACTCGGACCTCGTCGACATGCATTTCCTGCAAACGTGGCTCCACGTTGTCCCTCCTAAGTTTCGAGCTGGACTCAGTGTCCGGATCATCTTTCCCTGTTCAGC	ACAGTGTCGTGGCTCCTCTCCAATCTTACACTCGGACCTCGTCGACATGCATTTCCTGCAAACGTGGCTCCACGTTGTCCCTCCTAAGTTTCGAGCTGGACTCAGTGTCCGGATCATCTTTCCCTGTTCAGCAAATGGTTGGCA
ENST00000357681	ENSG00000058668	ATP2B4	set16	ENSG00000058668	ATP2B4	-46	4628	4660	33	TCAAGCTTAAGTTGAAATCCTTGTAAGTCTGTG	0.897849	-53.5785	0.363636	1	1	1	1	1	1	5	1	1	0	15	1	B3	ACAGTGTCGTGGCTCCTCTCCAATC	16	1	B4	TCCGGATCATCTTTCCCTGTTCAGC	ACAGTGTCGTGGCTCCTCTCCAATCTTACACTCGGACCTCGTCGACATGCATTTCAAGCTTAAGTTGAAATCCTTGTAAGTCTGTGCCTCCTAAGTTTCGAGCTGGACTCAGTGTCCGGATCATCTTTCCCTGTTCAGC	ACAGTGTCGTGGCTCCTCTCCAATCTTACACTCGGACCTCGTCGACATGCATTTCAAGCTTAAGTTGAAATCCTTGTAAGTCTGTGCCTCCTAAGTTTCGAGCTGGACTCAGTGTCCGGATCATCTTTCCCTGTTCAGCGGAGG
ENST00000357681	ENSG00000058668	ATP2B4	set16	ENSG00000058668	ATP2B4	-46	4239	4265	27	ATGGCGAATTCAGGGTGGGTCATGAAG	0.867849	-51.2785	0.518519	1	1	1	1	1	1	5	1	1	0	15	1	B3	ACAGTGTCGTGGCTCCTCTCCAATC	16	1	B4	TCCGGATCATCTTTCCCTGTTCAGC	ACAGTGTCGTGGCTCCTCTCCAATCTTACACTCGGACCTCGTCGACATGCATTATGGCGAATTCAGGGTGGGTCATGAAGCCTCCTAAGTTTCGAGCTGGACTCAGTGTCCGGATCATCTTTCCCTGTTCAGC	ACAGTGTCGTGGCTCCTCTCCAATCTTACACTCGGACCTCGTCGACATGCATTATGGCGAATTCAGGGTGGGTCATGAAGCCTCCTAAGTTTCGAGCTGGACTCAGTGTCCGGATCATCTTTCCCTGTTCAGCTGCAAGTTCTC
ENST00000357681	ENSG00000058668	ATP2B4	set16	ENSG00000058668	ATP2B4	-46	4041	4067	27	TCCTTGGTGATCTCCTCTTTGGTGGTG	0.897849	-51.8785	0.518519	1	1	1	0	1	1	4	1	1	0	15	1	B3	ACAGTGTCGTGGCTCCTCTCCAATC	16	1	B4	TCCGGATCATCTTTCCCTGTTCAGC	ACAGTGTCGTGGCTCCTCTCCAATCTTACACTCGGACCTCGTCGACATGCATTTCCTTGGTGATCTCCTCTTTGGTGGTGCCTCCTAAGTTTCGAGCTGGACTCAGTGTCCGGATCATCTTTCCCTGTTCAGC	ACAGTGTCGTGGCTCCTCTCCAATCTTACACTCGGACCTCGTCGACATGCATTTCCTTGGTGATCTCCTCTTTGGTGGTGCCTCCTAAGTTTCGAGCTGGACTCAGTGTCCGGATCATCTTTCCCTGTTCAGCCATACATGATA
ENST00000357681	ENSG00000058668	ATP2B4	set16	ENSG00000058668	ATP2B4	-46	3901	3928	28	GGCTGAGGCTTGTACAACTGAAGGGTTT	0.967849	-52.8785	0.5	1	1	1	0	1	1	4	1	1	0	15	1	B3	ACAGTGTCGTGGCTCCTCTCCAATC	16	1	B4	TCCGGATCATCTTTCCCTGTTCAGC	ACAGTGTCGTGGCTCCTCTCCAATCTTACACTCGGACCTCGTCGACATGCATTGGCTGAGGCTTGTACAACTGAAGGGTTTCCTCCTAAGTTTCGAGCTGGACTCAGTGTCCGGATCATCTTTCCCTGTTCAGC	ACAGTGTCGTGGCTCCTCTCCAATCTTACACTCGGACCTCGTCGACATGCATTGGCTGAGGCTTGTACAACTGAAGGGTTTCCTCCTAAGTTTCGAGCTGGACTCAGTGTCCGGATCATCTTTCCCTGTTCAGCACCCGTCCAC
ENST00000357681	ENSG00000058668	ATP2B4	set16	ENSG00000058668	ATP2B4	-46	3689	3715	27	GTGAATGTAGAGGTGCCTTCCTCCCAC	0.962151	-53.4785	0.555556	1	1	1	0	1	1	4	1	1	0	15	1	B3	ACAGTGTCGTGGCTCCTCTCCAATC	16	1	B4	TCCGGATCATCTTTCCCTGTTCAGC	ACAGTGTCGTGGCTCCTCTCCAATCTTACACTCGGACCTCGTCGACATGCATTGTGAATGTAGAGGTGCCTTCCTCCCACCCTCCTAAGTTTCGAGCTGGACTCAGTGTCCGGATCATCTTTCCCTGTTCAGC	ACAGTGTCGTGGCTCCTCTCCAATCTTACACTCGGACCTCGTCGACATGCATTGTGAATGTAGAGGTGCCTTCCTCCCACCCTCCTAAGTTTCGAGCTGGACTCAGTGTCCGGATCATCTTTCCCTGTTCAGCCTACCCTCTTG
ENST00000357681	ENSG00000058668	ATP2B4	set16	ENSG00000058668	ATP2B4	-46	3590	3618	29	GCCCAAGATGTTCTTCATCATAGTGCGTG	0.917849	-52.6785	0.482759	1	1	1	0	1	1	4	1	1	0	15	1	B3	ACAGTGTCGTGGCTCCTCTCCAATC	16	1	B4	TCCGGATCATCTTTCCCTGTTCAGC	ACAGTGTCGTGGCTCCTCTCCAATCTTACACTCGGACCTCGTCGACATGCATTGCCCAAGATGTTCTTCATCATAGTGCGTGCCTCCTAAGTTTCGAGCTGGACTCAGTGTCCGGATCATCTTTCCCTGTTCAGC	ACAGTGTCGTGGCTCCTCTCCAATCTTACACTCGGACCTCGTCGACATGCATTGCCCAAGATGTTCTTCATCATAGTGCGTGCCTCCTAAGTTTCGAGCTGGACTCAGTGTCCGGATCATCTTTCCCTGTTCAGCGCGCTTGAC
ENST00000357681	ENSG00000058668	ATP2B4	set16	ENSG00000058668	ATP2B4	-46	3561	3588	28	GATCAGAGGCTTATTTCGGCCATAGGGG	0.962151	-53.5785	0.535714	1	1	1	0	1	1	4	1	1	0	15	1	B3	ACAGTGTCGTGGCTCCTCTCCAATC	16	1	B4	TCCGGATCATCTTTCCCTGTTCAGC	ACAGTGTCGTGGCTCCTCTCCAATCTTACACTCGGACCTCGTCGACATGCATTGATCAGAGGCTTATTTCGGCCATAGGGGCCTCCTAAGTTTCGAGCTGGACTCAGTGTCCGGATCATCTTTCCCTGTTCAGC	ACAGTGTCGTGGCTCCTCTCCAATCTTACACTCGGACCTCGTCGACATGCATTGATCAGAGGCTTATTTCGGCCATAGGGGCCTCCTAAGTTTCGAGCTGGACTCAGTGTCCGGATCATCTTTCCCTGTTCAGCGTAGATATGT
ENST00000357681	ENSG00000058668	ATP2B4	set16	ENSG00000058668	ATP2B4	-46	1507	1533	27	GATCAGGATTCCATCTGCAGGCAGCAG	0.982151	-53.4785	0.555556	1	1	1	1	1	1	5	1	1	0	15	1	B3	ACAGTGTCGTGGCTCCTCTCCAATC	16	1	B4	TCCGGATCATCTTTCCCTGTTCAGC	ACAGTGTCGTGGCTCCTCTCCAATCTTACACTCGGACCTCGTCGACATGCATTGATCAGGATTCCATCTGCAGGCAGCAGCCTCCTAAGTTTCGAGCTGGACTCAGTGTCCGGATCATCTTTCCCTGTTCAGC	ACAGTGTCGTGGCTCCTCTCCAATCTTACACTCGGACCTCGTCGACATGCATTGATCAGGATTCCATCTGCAGGCAGCAGCCTCCTAAGTTTCGAGCTGGACTCAGTGTCCGGATCATCTTTCCCTGTTCAGCTGCGTGTCGTA
ENST00000357681	ENSG00000058668	ATP2B4	set16	ENSG00000058668	ATP2B4	-46	8387	8413	27	CACACACTGGACTGGGGTATACGTTGC	0.967849	-52.3785	0.555556	1	1	1	1	1	1	5	1	1	0	15	1	B3	ACAGTGTCGTGGCTCCTCTCCAATC	16	1	B4	TCCGGATCATCTTTCCCTGTTCAGC	ACAGTGTCGTGGCTCCTCTCCAATCTTACACTCGGACCTCGTCGACATGCATTCACACACTGGACTGGGGTATACGTTGCCCTCCTAAGTTTCGAGCTGGACTCAGTGTCCGGATCATCTTTCCCTGTTCAGC	ACAGTGTCGTGGCTCCTCTCCAATCTTACACTCGGACCTCGTCGACATGCATTCACACACTGGACTGGGGTATACGTTGCCCTCCTAAGTTTCGAGCTGGACTCAGTGTCCGGATCATCTTTCCCTGTTCAGCCTTTGGGTGCG
ENST00000357681	ENSG00000058668	ATP2B4	set16	ENSG00000058668	ATP2B4	-46	4756	4780	25	GGGGTGGGGTGATGCCAAGAGGATT	0.992151	-52.0785	0.6	1	1	1	0	1	1	4	1	1	0	15	1	B3	ACAGTGTCGTGGCTCCTCTCCAATC	16	1	B4	TCCGGATCATCTTTCCCTGTTCAGC	ACAGTGTCGTGGCTCCTCTCCAATCTTACACTCGGACCTCGTCGACATGCATTGGGGTGGGGTGATGCCAAGAGGATTCCTCCTAAGTTTCGAGCTGGACTCAGTGTCCGGATCATCTTTCCCTGTTCAGC	ACAGTGTCGTGGCTCCTCTCCAATCTTACACTCGGACCTCGTCGACATGCATTGGGGTGGGGTGATGCCAAGAGGATTCCTCCTAAGTTTCGAGCTGGACTCAGTGTCCGGATCATCTTTCCCTGTTCAGCGATTAATGGTTAA
ENST00000357681	ENSG00000058668	ATP2B4	set16	ENSG00000058668	ATP2B4	-46	7952	7980	29	CATTTATAAGTGCCCACCCTCACCAATGC	0.987849	-52.7785	0.482759	1	1	1	1	1	1	5	1	1	0	15	1	B3	ACAGTGTCGTGGCTCCTCTCCAATC	16	1	B4	TCCGGATCATCTTTCCCTGTTCAGC	ACAGTGTCGTGGCTCCTCTCCAATCTTACACTCGGACCTCGTCGACATGCATTCATTTATAAGTGCCCACCCTCACCAATGCCCTCCTAAGTTTCGAGCTGGACTCAGTGTCCGGATCATCTTTCCCTGTTCAGC	ACAGTGTCGTGGCTCCTCTCCAATCTTACACTCGGACCTCGTCGACATGCATTCATTTATAAGTGCCCACCCTCACCAATGCCCTCCTAAGTTTCGAGCTGGACTCAGTGTCCGGATCATCTTTCCCTGTTCAGCATACAACAC
ENST00000357681	ENSG00000058668	ATP2B4	set16	ENSG00000058668	ATP2B4	-46	7924	7950	27	TCGGGGGTGGTCCCTAGATATGAAAGG	0.942151	-53.2785	0.555556	1	1	1	1	1	1	5	1	1	0	15	1	B3	ACAGTGTCGTGGCTCCTCTCCAATC	16	1	B4	TCCGGATCATCTTTCCCTGTTCAGC	ACAGTGTCGTGGCTCCTCTCCAATCTTACACTCGGACCTCGTCGACATGCATTTCGGGGGTGGTCCCTAGATATGAAAGGCCTCCTAAGTTTCGAGCTGGACTCAGTGTCCGGATCATCTTTCCCTGTTCAGC	ACAGTGTCGTGGCTCCTCTCCAATCTTACACTCGGACCTCGTCGACATGCATTTCGGGGGTGGTCCCTAGATATGAAAGGCCTCCTAAGTTTCGAGCTGGACTCAGTGTCCGGATCATCTTTCCCTGTTCAGCTTCATGAAATT
ENST00000357681	ENSG00000058668	ATP2B4	set16	ENSG00000058668	ATP2B4	-46	7894	7922	29	GAGGAAGTCTCTGCATACTGTGATGGTAC	0.977849	-53.7785	0.482759	1	1	1	1	1	1	5	1	1	0	15	1	B3	ACAGTGTCGTGGCTCCTCTCCAATC	16	1	B4	TCCGGATCATCTTTCCCTGTTCAGC	ACAGTGTCGTGGCTCCTCTCCAATCTTACACTCGGACCTCGTCGACATGCATTGAGGAAGTCTCTGCATACTGTGATGGTACCCTCCTAAGTTTCGAGCTGGACTCAGTGTCCGGATCATCTTTCCCTGTTCAGC	ACAGTGTCGTGGCTCCTCTCCAATCTTACACTCGGACCTCGTCGACATGCATTGAGGAAGTCTCTGCATACTGTGATGGTACCCTCCTAAGTTTCGAGCTGGACTCAGTGTCCGGATCATCTTTCCCTGTTCAGCGGTCTCACT
ENST00000357681	ENSG00000058668	ATP2B4	set16	ENSG00000058668	ATP2B4	-46	634	660	27	CGTATGAAGTCTGGCAGCGAGAGGAGG	0.962151	-53.8785	0.592593	1	1	1	1	1	1	5	1	1	0	15	1	B3	ACAGTGTCGTGGCTCCTCTCCAATC	16	1	B4	TCCGGATCATCTTTCCCTGTTCAGC	ACAGTGTCGTGGCTCCTCTCCAATCTTACACTCGGACCTCGTCGACATGCATTCGTATGAAGTCTGGCAGCGAGAGGAGGCCTCCTAAGTTTCGAGCTGGACTCAGTGTCCGGATCATCTTTCCCTGTTCAGC	ACAGTGTCGTGGCTCCTCTCCAATCTTACACTCGGACCTCGTCGACATGCATTCGTATGAAGTCTGGCAGCGAGAGGAGGCCTCCTAAGTTTCGAGCTGGACTCAGTGTCCGGATCATCTTTCCCTGTTCAGCCGCCAGTGCAG
ENST00000357681	ENSG00000058668	ATP2B4	set16	ENSG00000058668	ATP2B4	-46	7568	7593	26	CTGTCACTCAGGGCTAGAACCAGCCA	0.997849	-52.9785	0.576923	1	1	1	1	1	1	5	1	1	0	15	1	B3	ACAGTGTCGTGGCTCCTCTCCAATC	16	1	B4	TCCGGATCATCTTTCCCTGTTCAGC	ACAGTGTCGTGGCTCCTCTCCAATCTTACACTCGGACCTCGTCGACATGCATTCTGTCACTCAGGGCTAGAACCAGCCACCTCCTAAGTTTCGAGCTGGACTCAGTGTCCGGATCATCTTTCCCTGTTCAGC	ACAGTGTCGTGGCTCCTCTCCAATCTTACACTCGGACCTCGTCGACATGCATTCTGTCACTCAGGGCTAGAACCAGCCACCTCCTAAGTTTCGAGCTGGACTCAGTGTCCGGATCATCTTTCCCTGTTCAGCAAACGTGGGCAG
ENST00000357681	ENSG00000058668	ATP2B4	set16	ENSG00000058668	ATP2B4	-46	7269	7298	30	AGGAAAGATTCTGTCTATCCATCTGCATGG	0.917849	-53.0785	0.433333	1	1	1	1	1	1	5	1	1	0	15	1	B3	ACAGTGTCGTGGCTCCTCTCCAATC	16	1	B4	TCCGGATCATCTTTCCCTGTTCAGC	ACAGTGTCGTGGCTCCTCTCCAATCTTACACTCGGACCTCGTCGACATGCATTAGGAAAGATTCTGTCTATCCATCTGCATGGCCTCCTAAGTTTCGAGCTGGACTCAGTGTCCGGATCATCTTTCCCTGTTCAGC	ACAGTGTCGTGGCTCCTCTCCAATCTTACACTCGGACCTCGTCGACATGCATTAGGAAAGATTCTGTCTATCCATCTGCATGGCCTCCTAAGTTTCGAGCTGGACTCAGTGTCCGGATCATCTTTCCCTGTTCAGCGCGTTCCT
ENST00000357681	ENSG00000058668	ATP2B4	set16	ENSG00000058668	ATP2B4	-46	7055	7087	33	TATTAACTTATGCCATATTTACCCACTGCCAGT	0.932151	-54.6785	0.363636	1	1	1	1	1	1	5	1	1	0	15	1	B3	ACAGTGTCGTGGCTCCTCTCCAATC	16	1	B4	TCCGGATCATCTTTCCCTGTTCAGC	ACAGTGTCGTGGCTCCTCTCCAATCTTACACTCGGACCTCGTCGACATGCATTTATTAACTTATGCCATATTTACCCACTGCCAGTCCTCCTAAGTTTCGAGCTGGACTCAGTGTCCGGATCATCTTTCCCTGTTCAGC	ACAGTGTCGTGGCTCCTCTCCAATCTTACACTCGGACCTCGTCGACATGCATTTATTAACTTATGCCATATTTACCCACTGCCAGTCCTCCTAAGTTTCGAGCTGGACTCAGTGTCCGGATCATCTTTCCCTGTTCAGCTTGTT
ENST00000357681	ENSG00000058668	ATP2B4	set16	ENSG00000058668	ATP2B4	-46	6323	6352	30	TCCTACGATGATGGATTATGTAGTCATGGG	0.907849	-52.6785	0.433333	1	1	1	1	1	1	5	1	1	0	15	1	B3	ACAGTGTCGTGGCTCCTCTCCAATC	16	1	B4	TCCGGATCATCTTTCCCTGTTCAGC	ACAGTGTCGTGGCTCCTCTCCAATCTTACACTCGGACCTCGTCGACATGCATTTCCTACGATGATGGATTATGTAGTCATGGGCCTCCTAAGTTTCGAGCTGGACTCAGTGTCCGGATCATCTTTCCCTGTTCAGC	ACAGTGTCGTGGCTCCTCTCCAATCTTACACTCGGACCTCGTCGACATGCATTTCCTACGATGATGGATTATGTAGTCATGGGCCTCCTAAGTTTCGAGCTGGACTCAGTGTCCGGATCATCTTTCCCTGTTCAGCCTGGACCG
ENST00000357681	ENSG00000058668	ATP2B4	set16	ENSG00000058668	ATP2B4	-46	6261	6286	26	TGTGGACAGCTCAGGTGAAAGGGGTG	0.982151	-52.7785	0.576923	1	1	1	1	1	1	5	1	1	0	15	1	B3	ACAGTGTCGTGGCTCCTCTCCAATC	16	1	B4	TCCGGATCATCTTTCCCTGTTCAGC	ACAGTGTCGTGGCTCCTCTCCAATCTTACACTCGGACCTCGTCGACATGCATTTGTGGACAGCTCAGGTGAAAGGGGTGCCTCCTAAGTTTCGAGCTGGACTCAGTGTCCGGATCATCTTTCCCTGTTCAGC	ACAGTGTCGTGGCTCCTCTCCAATCTTACACTCGGACCTCGTCGACATGCATTTGTGGACAGCTCAGGTGAAAGGGGTGCCTCCTAAGTTTCGAGCTGGACTCAGTGTCCGGATCATCTTTCCCTGTTCAGCATTTGGCTCTAG
ENST00000357681	ENSG00000058668	ATP2B4	set16	ENSG00000058668	ATP2B4	-46	5442	5470	29	TAGATTTGGCAGCGTCTGGTCCTCAATAT	0.907849	-52.6785	0.448276	1	1	1	0	1	1	4	1	1	0	15	1	B3	ACAGTGTCGTGGCTCCTCTCCAATC	16	1	B4	TCCGGATCATCTTTCCCTGTTCAGC	ACAGTGTCGTGGCTCCTCTCCAATCTTACACTCGGACCTCGTCGACATGCATTTAGATTTGGCAGCGTCTGGTCCTCAATATCCTCCTAAGTTTCGAGCTGGACTCAGTGTCCGGATCATCTTTCCCTGTTCAGC	ACAGTGTCGTGGCTCCTCTCCAATCTTACACTCGGACCTCGTCGACATGCATTTAGATTTGGCAGCGTCTGGTCCTCAATATCCTCCTAAGTTTCGAGCTGGACTCAGTGTCCGGATCATCTTTCCCTGTTCAGCTAGGACAGC
ENST00000357681	ENSG00000058668	ATP2B4	set16	ENSG00000058668	ATP2B4	-46	5385	5415	31	TACCCAGTTCATTCTTTTGCCACCACTTTAG	0.977849	-53.3785	0.419355	1	1	1	0	1	1	4	1	1	0	15	1	B3	ACAGTGTCGTGGCTCCTCTCCAATC	16	1	B4	TCCGGATCATCTTTCCCTGTTCAGC	ACAGTGTCGTGGCTCCTCTCCAATCTTACACTCGGACCTCGTCGACATGCATTTACCCAGTTCATTCTTTTGCCACCACTTTAGCCTCCTAAGTTTCGAGCTGGACTCAGTGTCCGGATCATCTTTCCCTGTTCAGC	ACAGTGTCGTGGCTCCTCTCCAATCTTACACTCGGACCTCGTCGACATGCATTTACCCAGTTCATTCTTTTGCCACCACTTTAGCCTCCTAAGTTTCGAGCTGGACTCAGTGTCCGGATCATCTTTCCCTGTTCAGCACAGTTC
ENST00000357681	ENSG00000058668	ATP2B4	set16	ENSG00000058668	ATP2B4	-46	5124	5152	29	GTTCTTTTGGGCCAAAAGGGAGAAGGATC	0.977849	-53.0785	0.482759	1	1	0	1	1	1	4	1	1	0	15	1	B3	ACAGTGTCGTGGCTCCTCTCCAATC	16	1	B4	TCCGGATCATCTTTCCCTGTTCAGC	ACAGTGTCGTGGCTCCTCTCCAATCTTACACTCGGACCTCGTCGACATGCATTGTTCTTTTGGGCCAAAAGGGAGAAGGATCCCTCCTAAGTTTCGAGCTGGACTCAGTGTCCGGATCATCTTTCCCTGTTCAGC	ACAGTGTCGTGGCTCCTCTCCAATCTTACACTCGGACCTCGTCGACATGCATTGTTCTTTTGGGCCAAAAGGGAGAAGGATCCCTCCTAAGTTTCGAGCTGGACTCAGTGTCCGGATCATCTTTCCCTGTTCAGCTTGCGGCCT
ENST00000357681	ENSG00000058668	ATP2B4	set16	ENSG00000058668	ATP2B4	-46	1476	1505	30	TCACCGTATTTGACTTGGGCAATATCACCA	0.982151	-53.4785	0.433333	1	1	1	1	1	1	5	1	1	0	15	1	B3	ACAGTGTCGTGGCTCCTCTCCAATC	16	1	B4	TCCGGATCATCTTTCCCTGTTCAGC	ACAGTGTCGTGGCTCCTCTCCAATCTTACACTCGGACCTCGTCGACATGCATTTCACCGTATTTGACTTGGGCAATATCACCACCTCCTAAGTTTCGAGCTGGACTCAGTGTCCGGATCATCTTTCCCTGTTCAGC	ACAGTGTCGTGGCTCCTCTCCAATCTTACACTCGGACCTCGTCGACATGCATTTCACCGTATTTGACTTGGGCAATATCACCACCTCCTAAGTTTCGAGCTGGACTCAGTGTCCGGATCATCTTTCCCTGTTCAGCACTAACCC
ENST00000357681	ENSG00000058668	ATP2B4	set16	ENSG00000058668	ATP2B4	-46	2642	2670	29	GTCCAGGATTCGATTACACTTGCGCAAGA	0.967849	-53.3785	0.482759	1	1	1	1	1	1	5	1	1	0	15	1	B3	ACAGTGTCGTGGCTCCTCTCCAATC	16	1	B4	TCCGGATCATCTTTCCCTGTTCAGC	ACAGTGTCGTGGCTCCTCTCCAATCTTACACTCGGACCTCGTCGACATGCATTGTCCAGGATTCGATTACACTTGCGCAAGACCTCCTAAGTTTCGAGCTGGACTCAGTGTCCGGATCATCTTTCCCTGTTCAGC	ACAGTGTCGTGGCTCCTCTCCAATCTTACACTCGGACCTCGTCGACATGCATTGTCCAGGATTCGATTACACTTGCGCAAGACCTCCTAAGTTTCGAGCTGGACTCAGTGTCCGGATCATCTTTCCCTGTTCAGCCACTTGCCA
ENST00000357681	ENSG00000058668	ATP2B4	set16	ENSG00000058668	ATP2B4	-46	2588	2613	26	ACGGAAGCCACCGTTGGGATTCCTGA	0.962151	-52.8785	0.576923	1	1	1	1	1	1	5	1	1	0	15	1	B3	ACAGTGTCGTGGCTCCTCTCCAATC	16	1	B4	TCCGGATCATCTTTCCCTGTTCAGC	ACAGTGTCGTGGCTCCTCTCCAATCTTACACTCGGACCTCGTCGACATGCATTACGGAAGCCACCGTTGGGATTCCTGACCTCCTAAGTTTCGAGCTGGACTCAGTGTCCGGATCATCTTTCCCTGTTCAGC	ACAGTGTCGTGGCTCCTCTCCAATCTTACACTCGGACCTCGTCGACATGCATTACGGAAGCCACCGTTGGGATTCCTGACCTCCTAAGTTTCGAGCTGGACTCAGTGTCCGGATCATCTTTCCCTGTTCAGCATTAGAATTTAT
ENST00000357681	ENSG00000058668	ATP2B4	set16	ENSG00000058668	ATP2B4	-46	2528	2558	31	TTAAAGGTGTACACCTTGTAGAGCTTCTCCT	0.952151	-54.7785	0.419355	1	1	1	1	1	1	5	1	1	0	15	1	B3	ACAGTGTCGTGGCTCCTCTCCAATC	16	1	B4	TCCGGATCATCTTTCCCTGTTCAGC	ACAGTGTCGTGGCTCCTCTCCAATCTTACACTCGGACCTCGTCGACATGCATTTTAAAGGTGTACACCTTGTAGAGCTTCTCCTCCTCCTAAGTTTCGAGCTGGACTCAGTGTCCGGATCATCTTTCCCTGTTCAGC	ACAGTGTCGTGGCTCCTCTCCAATCTTACACTCGGACCTCGTCGACATGCATTTTAAAGGTGTACACCTTGTAGAGCTTCTCCTCCTCCTAAGTTTCGAGCTGGACTCAGTGTCCGGATCATCTTTCCCTGTTCAGCTCCTTGC
ENST00000357681	ENSG00000058668	ATP2B4	set16	ENSG00000058668	ATP2B4	-46	4294	4322	29	TCAGGATTTTCCTCCTCTTCCTCATCCAG	0.972151	-54.0785	0.482759	1	1	1	0	1	1	4	1	1	0	15	1	B3	ACAGTGTCGTGGCTCCTCTCCAATC	16	1	B4	TCCGGATCATCTTTCCCTGTTCAGC	ACAGTGTCGTGGCTCCTCTCCAATCTTACACTCGGACCTCGTCGACATGCATTTCAGGATTTTCCTCCTCTTCCTCATCCAGCCTCCTAAGTTTCGAGCTGGACTCAGTGTCCGGATCATCTTTCCCTGTTCAGC	ACAGTGTCGTGGCTCCTCTCCAATCTTACACTCGGACCTCGTCGACATGCATTTCAGGATTTTCCTCCTCTTCCTCATCCAGCCTCCTAAGTTTCGAGCTGGACTCAGTGTCCGGATCATCTTTCCCTGTTCAGCACACCGGAA
ENST00000357681	ENSG00000058668	ATP2B4	set16	ENSG00000058668	ATP2B4	-46	5939	5964	26	GGGATGCTTTGGGCAGTATTCAGGGG	0.957849	-51.8785	0.576923	1	1	1	0	1	1	4	1	1	0	15	1	B3	ACAGTGTCGTGGCTCCTCTCCAATC	16	1	B4	TCCGGATCATCTTTCCCTGTTCAGC	ACAGTGTCGTGGCTCCTCTCCAATCTTACACTCGGACCTCGTCGACATGCATTGGGATGCTTTGGGCAGTATTCAGGGGCCTCCTAAGTTTCGAGCTGGACTCAGTGTCCGGATCATCTTTCCCTGTTCAGC	ACAGTGTCGTGGCTCCTCTCCAATCTTACACTCGGACCTCGTCGACATGCATTGGGATGCTTTGGGCAGTATTCAGGGGCCTCCTAAGTTTCGAGCTGGACTCAGTGTCCGGATCATCTTTCCCTGTTCAGCTGCATGTCGGCG
ENST00000357681	ENSG00000058668	ATP2B4	set16	ENSG00000058668	ATP2B4	-46	5884	5908	25	AGCTGGAGCATGTGGCTGAAGCGGG	0.922151	-53.3785	0.64	1	1	1	0	1	1	4	1	1	0	15	1	B3	ACAGTGTCGTGGCTCCTCTCCAATC	16	1	B4	TCCGGATCATCTTTCCCTGTTCAGC	ACAGTGTCGTGGCTCCTCTCCAATCTTACACTCGGACCTCGTCGACATGCATTAGCTGGAGCATGTGGCTGAAGCGGGCCTCCTAAGTTTCGAGCTGGACTCAGTGTCCGGATCATCTTTCCCTGTTCAGC	ACAGTGTCGTGGCTCCTCTCCAATCTTACACTCGGACCTCGTCGACATGCATTAGCTGGAGCATGTGGCTGAAGCGGGCCTCCTAAGTTTCGAGCTGGACTCAGTGTCCGGATCATCTTTCCCTGTTCAGCAGCATATATGGTA
ENST00000357681	ENSG00000058668	ATP2B4	set16	ENSG00000058668	ATP2B4	-46	5829	5857	29	TGCGGGGGGTCTTTTTCTCGTTTAAGTTG	0.917849	-52.2785	0.482759	1	1	1	0	1	1	4	1	1	0	15	1	B3	ACAGTGTCGTGGCTCCTCTCCAATC	16	1	B4	TCCGGATCATCTTTCCCTGTTCAGC	ACAGTGTCGTGGCTCCTCTCCAATCTTACACTCGGACCTCGTCGACATGCATTTGCGGGGGGTCTTTTTCTCGTTTAAGTTGCCTCCTAAGTTTCGAGCTGGACTCAGTGTCCGGATCATCTTTCCCTGTTCAGC	ACAGTGTCGTGGCTCCTCTCCAATCTTACACTCGGACCTCGTCGACATGCATTTGCGGGGGGTCTTTTTCTCGTTTAAGTTGCCTCCTAAGTTTCGAGCTGGACTCAGTGTCCGGATCATCTTTCCCTGTTCAGCATGTCAGCT
ENST00000357681	ENSG00000058668	ATP2B4	set16	ENSG00000058668	ATP2B4	-46	5800	5827	28	CAAAATGTCACAGGGGCCTCCCACTTTG	0.942151	-53.1785	0.535714	1	1	0	1	1	1	4	1	1	0	15	1	B3	ACAGTGTCGTGGCTCCTCTCCAATC	16	1	B4	TCCGGATCATCTTTCCCTGTTCAGC	ACAGTGTCGTGGCTCCTCTCCAATCTTACACTCGGACCTCGTCGACATGCATTCAAAATGTCACAGGGGCCTCCCACTTTGCCTCCTAAGTTTCGAGCTGGACTCAGTGTCCGGATCATCTTTCCCTGTTCAGC	ACAGTGTCGTGGCTCCTCTCCAATCTTACACTCGGACCTCGTCGACATGCATTCAAAATGTCACAGGGGCCTCCCACTTTGCCTCCTAAGTTTCGAGCTGGACTCAGTGTCCGGATCATCTTTCCCTGTTCAGCTTTATGGAGA
ENST00000357681	ENSG00000058668	ATP2B4	set16	ENSG00000058668	ATP2B4	-46	5643	5669	27	AAGCTCAAGGTTTCTGGCCTCTGCAGG	0.952151	-53.6785	0.555556	1	1	1	0	1	1	4	1	1	0	15	1	B3	ACAGTGTCGTGGCTCCTCTCCAATC	16	1	B4	TCCGGATCATCTTTCCCTGTTCAGC	ACAGTGTCGTGGCTCCTCTCCAATCTTACACTCGGACCTCGTCGACATGCATTAAGCTCAAGGTTTCTGGCCTCTGCAGGCCTCCTAAGTTTCGAGCTGGACTCAGTGTCCGGATCATCTTTCCCTGTTCAGC	ACAGTGTCGTGGCTCCTCTCCAATCTTACACTCGGACCTCGTCGACATGCATTAAGCTCAAGGTTTCTGGCCTCTGCAGGCCTCCTAAGTTTCGAGCTGGACTCAGTGTCCGGATCATCTTTCCCTGTTCAGCTCATCCTACTT
ENST00000357681	ENSG00000058668	ATP2B4	set16	ENSG00000058668	ATP2B4	-46	1651	1675	25	CAACAGCTGTCACCACCATCCGGCC	0.972151	-52.4785	0.64	1	1	1	1	1	1	5	1	1	0	15	1	B3	ACAGTGTCGTGGCTCCTCTCCAATC	16	1	B4	TCCGGATCATCTTTCCCTGTTCAGC	ACAGTGTCGTGGCTCCTCTCCAATCTTACACTCGGACCTCGTCGACATGCATTCAACAGCTGTCACCACCATCCGGCCCCTCCTAAGTTTCGAGCTGGACTCAGTGTCCGGATCATCTTTCCCTGTTCAGC	ACAGTGTCGTGGCTCCTCTCCAATCTTACACTCGGACCTCGTCGACATGCATTCAACAGCTGTCACCACCATCCGGCCCCTCCTAAGTTTCGAGCTGGACTCAGTGTCCGGATCATCTTTCCCTGTTCAGCCTACCGCGTAGTC
ENST00000357681	ENSG00000058668	ATP2B4	set16	ENSG00000058668	ATP2B4	-46	1535	1565	31	GAGCTCTCATCAATCTTCAGATCATTCCCTT	0.992151	-54.6785	0.419355	1	1	1	1	1	1	5	1	1	0	15	1	B3	ACAGTGTCGTGGCTCCTCTCCAATC	16	1	B4	TCCGGATCATCTTTCCCTGTTCAGC	ACAGTGTCGTGGCTCCTCTCCAATCTTACACTCGGACCTCGTCGACATGCATTGAGCTCTCATCAATCTTCAGATCATTCCCTTCCTCCTAAGTTTCGAGCTGGACTCAGTGTCCGGATCATCTTTCCCTGTTCAGC	ACAGTGTCGTGGCTCCTCTCCAATCTTACACTCGGACCTCGTCGACATGCATTGAGCTCTCATCAATCTTCAGATCATTCCCTTCCTCCTAAGTTTCGAGCTGGACTCAGTGTCCGGATCATCTTTCCCTGTTCAGCCTGCTTC
ENST00000357681	ENSG00000058668	ATP2B4	set16	ENSG00000058668	ATP2B4	-46	1215	1244	30	AGTTCATTTTCTTCACCAGCAGGGCGATAA	0.967849	-53.3785	0.433333	1	1	1	1	1	1	5	1	1	0	15	1	B3	ACAGTGTCGTGGCTCCTCTCCAATC	16	1	B4	TCCGGATCATCTTTCCCTGTTCAGC	ACAGTGTCGTGGCTCCTCTCCAATCTTACACTCGGACCTCGTCGACATGCATTAGTTCATTTTCTTCACCAGCAGGGCGATAACCTCCTAAGTTTCGAGCTGGACTCAGTGTCCGGATCATCTTTCCCTGTTCAGC	ACAGTGTCGTGGCTCCTCTCCAATCTTACACTCGGACCTCGTCGACATGCATTAGTTCATTTTCTTCACCAGCAGGGCGATAACCTCCTAAGTTTCGAGCTGGACTCAGTGTCCGGATCATCTTTCCCTGTTCAGCGCTGCGGG
ENST00000357681	ENSG00000058668	ATP2B4	set16	ENSG00000058668	ATP2B4	-46	1013	1040	28	ACAGGGGAGGTTTTCAGTCTACTGCAGA	0.952151	-53.9785	0.5	1	1	1	1	1	1	5	1	1	0	15	1	B3	ACAGTGTCGTGGCTCCTCTCCAATC	16	1	B4	TCCGGATCATCTTTCCCTGTTCAGC	ACAGTGTCGTGGCTCCTCTCCAATCTTACACTCGGACCTCGTCGACATGCATTACAGGGGAGGTTTTCAGTCTACTGCAGACCTCCTAAGTTTCGAGCTGGACTCAGTGTCCGGATCATCTTTCCCTGTTCAGC	ACAGTGTCGTGGCTCCTCTCCAATCTTACACTCGGACCTCGTCGACATGCATTACAGGGGAGGTTTTCAGTCTACTGCAGACCTCCTAAGTTTCGAGCTGGACTCAGTGTCCGGATCATCTTTCCCTGTTCAGCACTTGGTAAG
ENST00000357681	ENSG00000058668	ATP2B4	set16	ENSG00000058668	ATP2B4	-46	1449	1474	26	CCACAATCTCAGCCACAGGGAGCTGG	0.902151	-53.6785	0.615385	1	1	1	1	1	1	5	1	1	0	15	1	B3	ACAGTGTCGTGGCTCCTCTCCAATC	16	1	B4	TCCGGATCATCTTTCCCTGTTCAGC	ACAGTGTCGTGGCTCCTCTCCAATCTTACACTCGGACCTCGTCGACATGCATTCCACAATCTCAGCCACAGGGAGCTGGCCTCCTAAGTTTCGAGCTGGACTCAGTGTCCGGATCATCTTTCCCTGTTCAGC	ACAGTGTCGTGGCTCCTCTCCAATCTTACACTCGGACCTCGTCGACATGCATTCCACAATCTCAGCCACAGGGAGCTGGCCTCCTAAGTTTCGAGCTGGACTCAGTGTCCGGATCATCTTTCCCTGTTCAGCACCAATTCCACG
ENST00000357681	ENSG00000058668	ATP2B4	set16	ENSG00000058668	ATP2B4	-46	1419	1447	29	TGAGTTGACCGTTTCGGATGATGGAGAAC	0.977849	-53.3785	0.482759	1	1	1	1	1	1	5	1	1	0	15	1	B3	ACAGTGTCGTGGCTCCTCTCCAATC	16	1	B4	TCCGGATCATCTTTCCCTGTTCAGC	ACAGTGTCGTGGCTCCTCTCCAATCTTACACTCGGACCTCGTCGACATGCATTTGAGTTGACCGTTTCGGATGATGGAGAACCCTCCTAAGTTTCGAGCTGGACTCAGTGTCCGGATCATCTTTCCCTGTTCAGC	ACAGTGTCGTGGCTCCTCTCCAATCTTACACTCGGACCTCGTCGACATGCATTTGAGTTGACCGTTTCGGATGATGGAGAACCCTCCTAAGTTTCGAGCTGGACTCAGTGTCCGGATCATCTTTCCCTGTTCAGCCTGCCGGAA
ENST00000357681	ENSG00000058668	ATP2B4	set16	ENSG00000058668	ATP2B4	-46	4146	4176	31	TTTGACCACTTTGATCTGAGTCTGGATACGG	0.872151	-55.3785	0.451613	1	1	1	0	1	1	4	1	1	0	15	1	B3	ACAGTGTCGTGGCTCCTCTCCAATC	16	1	B4	TCCGGATCATCTTTCCCTGTTCAGC	ACAGTGTCGTGGCTCCTCTCCAATCTTACACTCGGACCTCGTCGACATGCATTTTTGACCACTTTGATCTGAGTCTGGATACGGCCTCCTAAGTTTCGAGCTGGACTCAGTGTCCGGATCATCTTTCCCTGTTCAGC	ACAGTGTCGTGGCTCCTCTCCAATCTTACACTCGGACCTCGTCGACATGCATTTTTGACCACTTTGATCTGAGTCTGGATACGGCCTCCTAAGTTTCGAGCTGGACTCAGTGTCCGGATCATCTTTCCCTGTTCAGCTTTAGTG
ENST00000357681	ENSG00000058668	ATP2B4	set16	ENSG00000058668	ATP2B4	-46	4069	4094	26	TGGTCAATCTCATCCAGTCCCTCGGC	0.982151	-53.0785	0.576923	1	1	1	0	1	1	4	1	1	0	15	1	B3	ACAGTGTCGTGGCTCCTCTCCAATC	16	1	B4	TCCGGATCATCTTTCCCTGTTCAGC	ACAGTGTCGTGGCTCCTCTCCAATCTTACACTCGGACCTCGTCGACATGCATTTGGTCAATCTCATCCAGTCCCTCGGCCCTCCTAAGTTTCGAGCTGGACTCAGTGTCCGGATCATCTTTCCCTGTTCAGC	ACAGTGTCGTGGCTCCTCTCCAATCTTACACTCGGACCTCGTCGACATGCATTTGGTCAATCTCATCCAGTCCCTCGGCCCTCCTAAGTTTCGAGCTGGACTCAGTGTCCGGATCATCTTTCCCTGTTCAGCGTGCTAACTTCC
ENST00000357681	ENSG00000058668	ATP2B4	set16	ENSG00000058668	ATP2B4	-46	4267	4292	26	AGTGGTGTTCGTGGCAACTCCTCCTC	0.977849	-52.6785	0.576923	1	1	1	0	1	1	4	1	1	0	15	1	B3	ACAGTGTCGTGGCTCCTCTCCAATC	16	1	B4	TCCGGATCATCTTTCCCTGTTCAGC	ACAGTGTCGTGGCTCCTCTCCAATCTTACACTCGGACCTCGTCGACATGCATTAGTGGTGTTCGTGGCAACTCCTCCTCCCTCCTAAGTTTCGAGCTGGACTCAGTGTCCGGATCATCTTTCCCTGTTCAGC	ACAGTGTCGTGGCTCCTCTCCAATCTTACACTCGGACCTCGTCGACATGCATTAGTGGTGTTCGTGGCAACTCCTCCTCCCTCCTAAGTTTCGAGCTGGACTCAGTGTCCGGATCATCTTTCCCTGTTCAGCTCGTACGGAGAG
ENST00000357681	ENSG00000058668	ATP2B4	set16	ENSG00000058668	ATP2B4	-46	4208	4237	30	TGTGGATGGACTTTTGGTTGTAGGGTTTCT	0.972151	-53.5785	0.433333	1	1	1	0	1	1	4	1	1	0	15	1	B3	ACAGTGTCGTGGCTCCTCTCCAATC	16	1	B4	TCCGGATCATCTTTCCCTGTTCAGC	ACAGTGTCGTGGCTCCTCTCCAATCTTACACTCGGACCTCGTCGACATGCATTTGTGGATGGACTTTTGGTTGTAGGGTTTCTCCTCCTAAGTTTCGAGCTGGACTCAGTGTCCGGATCATCTTTCCCTGTTCAGC	ACAGTGTCGTGGCTCCTCTCCAATCTTACACTCGGACCTCGTCGACATGCATTTGTGGATGGACTTTTGGTTGTAGGGTTTCTCCTCCTAAGTTTCGAGCTGGACTCAGTGTCCGGATCATCTTTCCCTGTTCAGCCGCTAGTC
ENST00000357681	ENSG00000058668	ATP2B4	set16	ENSG00000058668	ATP2B4	-46	518	547	30	TAGGTAGGTTCCTAGCTTAGACCAACTTGC	0.902151	-55.0785	0.466667	1	1	1	1	1	1	5	1	1	0	15	1	B3	ACAGTGTCGTGGCTCCTCTCCAATC	16	1	B4	TCCGGATCATCTTTCCCTGTTCAGC	ACAGTGTCGTGGCTCCTCTCCAATCTTACACTCGGACCTCGTCGACATGCATTTAGGTAGGTTCCTAGCTTAGACCAACTTGCCCTCCTAAGTTTCGAGCTGGACTCAGTGTCCGGATCATCTTTCCCTGTTCAGC	ACAGTGTCGTGGCTCCTCTCCAATCTTACACTCGGACCTCGTCGACATGCATTTAGGTAGGTTCCTAGCTTAGACCAACTTGCCCTCCTAAGTTTCGAGCTGGACTCAGTGTCCGGATCATCTTTCCCTGTTCAGCCGTCGAGT
ENST00000357681	ENSG00000058668	ATP2B4	set16	ENSG00000058668	ATP2B4	-46	399	425	27	GAGGAGAGCTTCCTGGATACCGATGAC	0.977849	-53.3785	0.555556	1	1	1	1	1	1	5	1	1	0	15	1	B3	ACAGTGTCGTGGCTCCTCTCCAATC	16	1	B4	TCCGGATCATCTTTCCCTGTTCAGC	ACAGTGTCGTGGCTCCTCTCCAATCTTACACTCGGACCTCGTCGACATGCATTGAGGAGAGCTTCCTGGATACCGATGACCCTCCTAAGTTTCGAGCTGGACTCAGTGTCCGGATCATCTTTCCCTGTTCAGC	ACAGTGTCGTGGCTCCTCTCCAATCTTACACTCGGACCTCGTCGACATGCATTGAGGAGAGCTTCCTGGATACCGATGACCCTCCTAAGTTTCGAGCTGGACTCAGTGTCCGGATCATCTTTCCCTGTTCAGCATCGTTACCTC
ENST00000357681	ENSG00000058668	ATP2B4	set16	ENSG00000058668	ATP2B4	-46	1944	1969	26	GAGCAGACATGAGCAGACCGGCTTTC	0.897849	-52.2785	0.576923	1	1	1	1	1	1	5	1	1	0	15	1	B3	ACAGTGTCGTGGCTCCTCTCCAATC	16	1	B4	TCCGGATCATCTTTCCCTGTTCAGC	ACAGTGTCGTGGCTCCTCTCCAATCTTACACTCGGACCTCGTCGACATGCATTGAGCAGACATGAGCAGACCGGCTTTCCCTCCTAAGTTTCGAGCTGGACTCAGTGTCCGGATCATCTTTCCCTGTTCAGC	ACAGTGTCGTGGCTCCTCTCCAATCTTACACTCGGACCTCGTCGACATGCATTGAGCAGACATGAGCAGACCGGCTTTCCCTCCTAAGTTTCGAGCTGGACTCAGTGTCCGGATCATCTTTCCCTGTTCAGCCTCTCAAGGGTG
ENST00000357681	ENSG00000058668	ATP2B4	set16	ENSG00000058668	ATP2B4	-46	870	895	26	CCATCGAGTTGGCAGGCAAGACACGG	0.997849	-52.5785	0.615385	1	1	1	1	1	1	5	1	1	0	15	1	B3	ACAGTGTCGTGGCTCCTCTCCAATC	16	1	B4	TCCGGATCATCTTTCCCTGTTCAGC	ACAGTGTCGTGGCTCCTCTCCAATCTTACACTCGGACCTCGTCGACATGCATTCCATCGAGTTGGCAGGCAAGACACGGCCTCCTAAGTTTCGAGCTGGACTCAGTGTCCGGATCATCTTTCCCTGTTCAGC	ACAGTGTCGTGGCTCCTCTCCAATCTTACACTCGGACCTCGTCGACATGCATTCCATCGAGTTGGCAGGCAAGACACGGCCTCCTAAGTTTCGAGCTGGACTCAGTGTCCGGATCATCTTTCCCTGTTCAGCTCGTGCTGCCTC
ENST00000357681	ENSG00000058668	ATP2B4	set16	ENSG00000058668	ATP2B4	-46	2468	2496	29	CTGCTTCAGATCTGTGACAAAGCCTAGCA	0.992151	-54.0785	0.482759	1	1	1	1	1	1	5	1	1	0	15	1	B3	ACAGTGTCGTGGCTCCTCTCCAATC	16	1	B4	TCCGGATCATCTTTCCCTGTTCAGC	ACAGTGTCGTGGCTCCTCTCCAATCTTACACTCGGACCTCGTCGACATGCATTCTGCTTCAGATCTGTGACAAAGCCTAGCACCTCCTAAGTTTCGAGCTGGACTCAGTGTCCGGATCATCTTTCCCTGTTCAGC	ACAGTGTCGTGGCTCCTCTCCAATCTTACACTCGGACCTCGTCGACATGCATTCTGCTTCAGATCTGTGACAAAGCCTAGCACCTCCTAAGTTTCGAGCTGGACTCAGTGTCCGGATCATCTTTCCCTGTTCAGCTCTCTTGCG
ENST00000357681	ENSG00000058668	ATP2B4	set16	ENSG00000058668	ATP2B4	-46	2038	2066	29	TACTGGATGTAGATGGGAGTACACTCAGG	0.962151	-54.0785	0.482759	1	1	1	1	1	1	5	1	1	0	15	1	B3	ACAGTGTCGTGGCTCCTCTCCAATC	16	1	B4	TCCGGATCATCTTTCCCTGTTCAGC	ACAGTGTCGTGGCTCCTCTCCAATCTTACACTCGGACCTCGTCGACATGCATTTACTGGATGTAGATGGGAGTACACTCAGGCCTCCTAAGTTTCGAGCTGGACTCAGTGTCCGGATCATCTTTCCCTGTTCAGC	ACAGTGTCGTGGCTCCTCTCCAATCTTACACTCGGACCTCGTCGACATGCATTTACTGGATGTAGATGGGAGTACACTCAGGCCTCCTAAGTTTCGAGCTGGACTCAGTGTCCGGATCATCTTTCCCTGTTCAGCACCGATCAA
ENST00000357681	ENSG00000058668	ATP2B4	set16	ENSG00000058668	ATP2B4	-46	2006	2036	31	AGCCATGGTCTGCGATTTATCACAAAGTTGT	0.952151	-54.2785	0.419355	1	1	1	1	1	1	5	1	1	0	15	1	B3	ACAGTGTCGTGGCTCCTCTCCAATC	16	1	B4	TCCGGATCATCTTTCCCTGTTCAGC	ACAGTGTCGTGGCTCCTCTCCAATCTTACACTCGGACCTCGTCGACATGCATTAGCCATGGTCTGCGATTTATCACAAAGTTGTCCTCCTAAGTTTCGAGCTGGACTCAGTGTCCGGATCATCTTTCCCTGTTCAGC	ACAGTGTCGTGGCTCCTCTCCAATCTTACACTCGGACCTCGTCGACATGCATTAGCCATGGTCTGCGATTTATCACAAAGTTGTCCTCCTAAGTTTCGAGCTGGACTCAGTGTCCGGATCATCTTTCCCTGTTCAGCCGCCGCG
ENST00000357681	ENSG00000058668	ATP2B4	set16	ENSG00000058668	ATP2B4	-46	2328	2353	26	GGACTTTGGGCAGGAAGACATCAGGG	0.937849	-51.9785	0.576923	1	1	1	1	1	1	5	1	1	0	15	1	B3	ACAGTGTCGTGGCTCCTCTCCAATC	16	1	B4	TCCGGATCATCTTTCCCTGTTCAGC	ACAGTGTCGTGGCTCCTCTCCAATCTTACACTCGGACCTCGTCGACATGCATTGGACTTTGGGCAGGAAGACATCAGGGCCTCCTAAGTTTCGAGCTGGACTCAGTGTCCGGATCATCTTTCCCTGTTCAGC	ACAGTGTCGTGGCTCCTCTCCAATCTTACACTCGGACCTCGTCGACATGCATTGGACTTTGGGCAGGAAGACATCAGGGCCTCCTAAGTTTCGAGCTGGACTCAGTGTCCGGATCATCTTTCCCTGTTCAGCTGAAGGAATAGA
ENST00000357681	ENSG00000058668	ATP2B4	set16	ENSG00000058668	ATP2B4	-46	2498	2526	29	GGGCACTTCATTACGCACAGCCTGATAAT	0.972151	-53.6785	0.482759	1	1	1	1	1	1	5	1	1	0	15	1	B3	ACAGTGTCGTGGCTCCTCTCCAATC	16	1	B4	TCCGGATCATCTTTCCCTGTTCAGC	ACAGTGTCGTGGCTCCTCTCCAATCTTACACTCGGACCTCGTCGACATGCATTGGGCACTTCATTACGCACAGCCTGATAATCCTCCTAAGTTTCGAGCTGGACTCAGTGTCCGGATCATCTTTCCCTGTTCAGC	ACAGTGTCGTGGCTCCTCTCCAATCTTACACTCGGACCTCGTCGACATGCATTGGGCACTTCATTACGCACAGCCTGATAATCCTCCTAAGTTTCGAGCTGGACTCAGTGTCCGGATCATCTTTCCCTGTTCAGCGACTACACC
ENST00000436367	ENSG00000124788	ATXN1	set16	ENSG00000124788	ATXN1	-46	7864	7888	25	CAAGAAGCCCGGCCTTCGGTACCGA	0.977849	-52.1785	0.64	1	1	1	1	1	1	5	1	1	0	17	1	B5	ATACGTTCGTTTCCTCTGGGTGGGC	18	1	B6	GTTTCACAGTCCCTGTCGATGTGGT	ATACGTTCGTTTCCTCTGGGTGGGCTTACACTCGGACCTCGTCGACATGCATTCAAGAAGCCCGGCCTTCGGTACCGACCTCCTAAGTTTCGAGCTGGACTCAGTGGTTTCACAGTCCCTGTCGATGTGGT	ATACGTTCGTTTCCTCTGGGTGGGCTTACACTCGGACCTCGTCGACATGCATTCAAGAAGCCCGGCCTTCGGTACCGACCTCCTAAGTTTCGAGCTGGACTCAGTGGTTTCACAGTCCCTGTCGATGTGGTTGTCCGGAGTCAA
ENST00000436367	ENSG00000124788	ATXN1	set16	ENSG00000124788	ATXN1	-46	8248	8277	30	AGTTGTTTGGAGTTTCCCTATGCCAGAAAC	0.927849	-52.7785	0.433333	1	1	1	1	1	1	5	1	1	0	17	1	B5	ATACGTTCGTTTCCTCTGGGTGGGC	18	1	B6	GTTTCACAGTCCCTGTCGATGTGGT	ATACGTTCGTTTCCTCTGGGTGGGCTTACACTCGGACCTCGTCGACATGCATTAGTTGTTTGGAGTTTCCCTATGCCAGAAACCCTCCTAAGTTTCGAGCTGGACTCAGTGGTTTCACAGTCCCTGTCGATGTGGT	ATACGTTCGTTTCCTCTGGGTGGGCTTACACTCGGACCTCGTCGACATGCATTAGTTGTTTGGAGTTTCCCTATGCCAGAAACCCTCCTAAGTTTCGAGCTGGACTCAGTGGTTTCACAGTCCCTGTCGATGTGGTCCCGAGCG
ENST00000436367	ENSG00000124788	ATXN1	set16	ENSG00000124788	ATXN1	-46	7728	7760	33	ACAGATGTTAAAGGGTATTGTCAATCGTTTCCT	0.987849	-54.0785	0.363636	1	1	1	1	1	1	5	1	1	0	17	1	B5	ATACGTTCGTTTCCTCTGGGTGGGC	18	1	B6	GTTTCACAGTCCCTGTCGATGTGGT	ATACGTTCGTTTCCTCTGGGTGGGCTTACACTCGGACCTCGTCGACATGCATTACAGATGTTAAAGGGTATTGTCAATCGTTTCCTCCTCCTAAGTTTCGAGCTGGACTCAGTGGTTTCACAGTCCCTGTCGATGTGGT	ATACGTTCGTTTCCTCTGGGTGGGCTTACACTCGGACCTCGTCGACATGCATTACAGATGTTAAAGGGTATTGTCAATCGTTTCCTCCTCCTAAGTTTCGAGCTGGACTCAGTGGTTTCACAGTCCCTGTCGATGTGGTATCTG
ENST00000436367	ENSG00000124788	ATXN1	set16	ENSG00000124788	ATXN1	-46	7581	7613	33	ACTGTTCATCTTGAACATGCAGCATTATATTGC	0.987849	-54.2785	0.363636	1	1	1	1	1	1	5	1	1	0	17	1	B5	ATACGTTCGTTTCCTCTGGGTGGGC	18	1	B6	GTTTCACAGTCCCTGTCGATGTGGT	ATACGTTCGTTTCCTCTGGGTGGGCTTACACTCGGACCTCGTCGACATGCATTACTGTTCATCTTGAACATGCAGCATTATATTGCCCTCCTAAGTTTCGAGCTGGACTCAGTGGTTTCACAGTCCCTGTCGATGTGGT	ATACGTTCGTTTCCTCTGGGTGGGCTTACACTCGGACCTCGTCGACATGCATTACTGTTCATCTTGAACATGCAGCATTATATTGCCCTCCTAAGTTTCGAGCTGGACTCAGTGGTTTCACAGTCCCTGTCGATGTGGTTTAGC
ENST00000436367	ENSG00000124788	ATXN1	set16	ENSG00000124788	ATXN1	-46	1792	1816	25	TTTCTTGGTGGCCTCCCGAGGGACA	0.982151	-52.4785	0.6	1	1	1	0	1	1	4	1	1	0	17	1	B5	ATACGTTCGTTTCCTCTGGGTGGGC	18	1	B6	GTTTCACAGTCCCTGTCGATGTGGT	ATACGTTCGTTTCCTCTGGGTGGGCTTACACTCGGACCTCGTCGACATGCATTTTTCTTGGTGGCCTCCCGAGGGACACCTCCTAAGTTTCGAGCTGGACTCAGTGGTTTCACAGTCCCTGTCGATGTGGT	ATACGTTCGTTTCCTCTGGGTGGGCTTACACTCGGACCTCGTCGACATGCATTTTTCTTGGTGGCCTCCCGAGGGACACCTCCTAAGTTTCGAGCTGGACTCAGTGGTTTCACAGTCCCTGTCGATGTGGTCCATTAGTAGTAT
ENST00000436367	ENSG00000124788	ATXN1	set16	ENSG00000124788	ATXN1	-46	7833	7862	30	AGCTCTGCTTCCTCACCCATATCTGAAATA	0.982151	-54.2785	0.433333	1	1	1	1	1	1	5	1	1	0	17	1	B5	ATACGTTCGTTTCCTCTGGGTGGGC	18	1	B6	GTTTCACAGTCCCTGTCGATGTGGT	ATACGTTCGTTTCCTCTGGGTGGGCTTACACTCGGACCTCGTCGACATGCATTAGCTCTGCTTCCTCACCCATATCTGAAATACCTCCTAAGTTTCGAGCTGGACTCAGTGGTTTCACAGTCCCTGTCGATGTGGT	ATACGTTCGTTTCCTCTGGGTGGGCTTACACTCGGACCTCGTCGACATGCATTAGCTCTGCTTCCTCACCCATATCTGAAATACCTCCTAAGTTTCGAGCTGGACTCAGTGGTTTCACAGTCCCTGTCGATGTGGTTGTAGAGA
ENST00000436367	ENSG00000124788	ATXN1	set16	ENSG00000124788	ATXN1	-46	9448	9477	30	TATCTGCAGTGGAAGACTTGAGTCCTTTCA	0.992151	-54.2785	0.433333	1	1	1	1	1	1	5	1	1	0	17	1	B5	ATACGTTCGTTTCCTCTGGGTGGGC	18	1	B6	GTTTCACAGTCCCTGTCGATGTGGT	ATACGTTCGTTTCCTCTGGGTGGGCTTACACTCGGACCTCGTCGACATGCATTTATCTGCAGTGGAAGACTTGAGTCCTTTCACCTCCTAAGTTTCGAGCTGGACTCAGTGGTTTCACAGTCCCTGTCGATGTGGT	ATACGTTCGTTTCCTCTGGGTGGGCTTACACTCGGACCTCGTCGACATGCATTTATCTGCAGTGGAAGACTTGAGTCCTTTCACCTCCTAAGTTTCGAGCTGGACTCAGTGGTTTCACAGTCCCTGTCGATGTGGTAACCCCCC
ENST00000436367	ENSG00000124788	ATXN1	set16	ENSG00000124788	ATXN1	-46	6424	6453	30	TGCGTCTTAGAAATGAATCTGCCTCCTTCC	0.922151	-54.8785	0.466667	1	1	1	0	1	1	4	1	1	0	17	1	B5	ATACGTTCGTTTCCTCTGGGTGGGC	18	1	B6	GTTTCACAGTCCCTGTCGATGTGGT	ATACGTTCGTTTCCTCTGGGTGGGCTTACACTCGGACCTCGTCGACATGCATTTGCGTCTTAGAAATGAATCTGCCTCCTTCCCCTCCTAAGTTTCGAGCTGGACTCAGTGGTTTCACAGTCCCTGTCGATGTGGT	ATACGTTCGTTTCCTCTGGGTGGGCTTACACTCGGACCTCGTCGACATGCATTTGCGTCTTAGAAATGAATCTGCCTCCTTCCCCTCCTAAGTTTCGAGCTGGACTCAGTGGTTTCACAGTCCCTGTCGATGTGGTAACTCCAA
ENST00000436367	ENSG00000124788	ATXN1	set16	ENSG00000124788	ATXN1	-46	7457	7484	28	CTTCTGGACACGTCAGTGTACCACACAC	0.982151	-53.4785	0.535714	1	1	1	1	1	1	5	1	1	0	17	1	B5	ATACGTTCGTTTCCTCTGGGTGGGC	18	1	B6	GTTTCACAGTCCCTGTCGATGTGGT	ATACGTTCGTTTCCTCTGGGTGGGCTTACACTCGGACCTCGTCGACATGCATTCTTCTGGACACGTCAGTGTACCACACACCCTCCTAAGTTTCGAGCTGGACTCAGTGGTTTCACAGTCCCTGTCGATGTGGT	ATACGTTCGTTTCCTCTGGGTGGGCTTACACTCGGACCTCGTCGACATGCATTCTTCTGGACACGTCAGTGTACCACACACCCTCCTAAGTTTCGAGCTGGACTCAGTGGTTTCACAGTCCCTGTCGATGTGGTATTAGGATCT
ENST00000436367	ENSG00000124788	ATXN1	set16	ENSG00000124788	ATXN1	-46	7376	7400	25	GGAGAAGGAGGGATGCTGCCACTTC	0.887849	-51.6785	0.6	1	1	1	1	1	1	5	1	1	0	17	1	B5	ATACGTTCGTTTCCTCTGGGTGGGC	18	1	B6	GTTTCACAGTCCCTGTCGATGTGGT	ATACGTTCGTTTCCTCTGGGTGGGCTTACACTCGGACCTCGTCGACATGCATTGGAGAAGGAGGGATGCTGCCACTTCCCTCCTAAGTTTCGAGCTGGACTCAGTGGTTTCACAGTCCCTGTCGATGTGGT	ATACGTTCGTTTCCTCTGGGTGGGCTTACACTCGGACCTCGTCGACATGCATTGGAGAAGGAGGGATGCTGCCACTTCCCTCCTAAGTTTCGAGCTGGACTCAGTGGTTTCACAGTCCCTGTCGATGTGGTCCGACGTTTAGCT
ENST00000436367	ENSG00000124788	ATXN1	set16	ENSG00000124788	ATXN1	-46	4758	4786	29	AGTTTCTCTGCCAACTCTGCATATGCCTT	0.927849	-52.9785	0.448276	1	1	1	0	1	1	4	1	1	0	17	1	B5	ATACGTTCGTTTCCTCTGGGTGGGC	18	1	B6	GTTTCACAGTCCCTGTCGATGTGGT	ATACGTTCGTTTCCTCTGGGTGGGCTTACACTCGGACCTCGTCGACATGCATTAGTTTCTCTGCCAACTCTGCATATGCCTTCCTCCTAAGTTTCGAGCTGGACTCAGTGGTTTCACAGTCCCTGTCGATGTGGT	ATACGTTCGTTTCCTCTGGGTGGGCTTACACTCGGACCTCGTCGACATGCATTAGTTTCTCTGCCAACTCTGCATATGCCTTCCTCCTAAGTTTCGAGCTGGACTCAGTGGTTTCACAGTCCCTGTCGATGTGGTACGGTCACT
ENST00000436367	ENSG00000124788	ATXN1	set16	ENSG00000124788	ATXN1	-46	4788	4819	32	AATGAGTATTCTCTTCTCCATCCCTTTTCTCT	0.937849	-54.0785	0.375	1	1	1	0	1	1	4	1	1	0	17	1	B5	ATACGTTCGTTTCCTCTGGGTGGGC	18	1	B6	GTTTCACAGTCCCTGTCGATGTGGT	ATACGTTCGTTTCCTCTGGGTGGGCTTACACTCGGACCTCGTCGACATGCATTAATGAGTATTCTCTTCTCCATCCCTTTTCTCTCCTCCTAAGTTTCGAGCTGGACTCAGTGGTTTCACAGTCCCTGTCGATGTGGT	ATACGTTCGTTTCCTCTGGGTGGGCTTACACTCGGACCTCGTCGACATGCATTAATGAGTATTCTCTTCTCCATCCCTTTTCTCTCCTCCTAAGTTTCGAGCTGGACTCAGTGGTTTCACAGTCCCTGTCGATGTGGTGTGTGC
ENST00000436367	ENSG00000124788	ATXN1	set16	ENSG00000124788	ATXN1	-46	6368	6392	25	GTGACAGGGGACACTGCGGTTCCTC	0.962151	-52.9785	0.64	1	1	1	0	1	1	4	1	1	0	17	1	B5	ATACGTTCGTTTCCTCTGGGTGGGC	18	1	B6	GTTTCACAGTCCCTGTCGATGTGGT	ATACGTTCGTTTCCTCTGGGTGGGCTTACACTCGGACCTCGTCGACATGCATTGTGACAGGGGACACTGCGGTTCCTCCCTCCTAAGTTTCGAGCTGGACTCAGTGGTTTCACAGTCCCTGTCGATGTGGT	ATACGTTCGTTTCCTCTGGGTGGGCTTACACTCGGACCTCGTCGACATGCATTGTGACAGGGGACACTGCGGTTCCTCCCTCCTAAGTTTCGAGCTGGACTCAGTGGTTTCACAGTCCCTGTCGATGTGGTTTCCACAGTTAGT
ENST00000436367	ENSG00000124788	ATXN1	set16	ENSG00000124788	ATXN1	-46	5978	6008	31	TATTGCTCCAAACCATGTGTGTTTTCCCATC	0.942151	-53.9785	0.419355	1	1	1	0	1	1	4	1	1	0	17	1	B5	ATACGTTCGTTTCCTCTGGGTGGGC	18	1	B6	GTTTCACAGTCCCTGTCGATGTGGT	ATACGTTCGTTTCCTCTGGGTGGGCTTACACTCGGACCTCGTCGACATGCATTTATTGCTCCAAACCATGTGTGTTTTCCCATCCCTCCTAAGTTTCGAGCTGGACTCAGTGGTTTCACAGTCCCTGTCGATGTGGT	ATACGTTCGTTTCCTCTGGGTGGGCTTACACTCGGACCTCGTCGACATGCATTTATTGCTCCAAACCATGTGTGTTTTCCCATCCCTCCTAAGTTTCGAGCTGGACTCAGTGGTTTCACAGTCCCTGTCGATGTGGTAACCTTA
ENST00000436367	ENSG00000124788	ATXN1	set16	ENSG00000124788	ATXN1	-46	5069	5096	28	TTTCTAAGAGCCCGCTAAGACCTGGCTT	0.977849	-53.3785	0.5	1	1	1	0	1	1	4	1	1	0	17	1	B5	ATACGTTCGTTTCCTCTGGGTGGGC	18	1	B6	GTTTCACAGTCCCTGTCGATGTGGT	ATACGTTCGTTTCCTCTGGGTGGGCTTACACTCGGACCTCGTCGACATGCATTTTTCTAAGAGCCCGCTAAGACCTGGCTTCCTCCTAAGTTTCGAGCTGGACTCAGTGGTTTCACAGTCCCTGTCGATGTGGT	ATACGTTCGTTTCCTCTGGGTGGGCTTACACTCGGACCTCGTCGACATGCATTTTTCTAAGAGCCCGCTAAGACCTGGCTTCCTCCTAAGTTTCGAGCTGGACTCAGTGGTTTCACAGTCCCTGTCGATGTGGTCATTTCCAGA
ENST00000436367	ENSG00000124788	ATXN1	set16	ENSG00000124788	ATXN1	-46	4172	4196	25	CGTGGGTGTTCGCTCTCTCCCTCTC	0.927849	-52.2785	0.64	1	1	1	0	1	1	4	1	1	0	17	1	B5	ATACGTTCGTTTCCTCTGGGTGGGC	18	1	B6	GTTTCACAGTCCCTGTCGATGTGGT	ATACGTTCGTTTCCTCTGGGTGGGCTTACACTCGGACCTCGTCGACATGCATTCGTGGGTGTTCGCTCTCTCCCTCTCCCTCCTAAGTTTCGAGCTGGACTCAGTGGTTTCACAGTCCCTGTCGATGTGGT	ATACGTTCGTTTCCTCTGGGTGGGCTTACACTCGGACCTCGTCGACATGCATTCGTGGGTGTTCGCTCTCTCCCTCTCCCTCCTAAGTTTCGAGCTGGACTCAGTGGTTTCACAGTCCCTGTCGATGTGGTCACCAAGTGTGGC
ENST00000436367	ENSG00000124788	ATXN1	set16	ENSG00000124788	ATXN1	-46	3009	3034	26	GTCGGCCTTTGAGTGCTTCAGCAGGA	0.977849	-52.8785	0.576923	1	1	1	0	1	1	4	1	1	0	17	1	B5	ATACGTTCGTTTCCTCTGGGTGGGC	18	1	B6	GTTTCACAGTCCCTGTCGATGTGGT	ATACGTTCGTTTCCTCTGGGTGGGCTTACACTCGGACCTCGTCGACATGCATTGTCGGCCTTTGAGTGCTTCAGCAGGACCTCCTAAGTTTCGAGCTGGACTCAGTGGTTTCACAGTCCCTGTCGATGTGGT	ATACGTTCGTTTCCTCTGGGTGGGCTTACACTCGGACCTCGTCGACATGCATTGTCGGCCTTTGAGTGCTTCAGCAGGACCTCCTAAGTTTCGAGCTGGACTCAGTGGTTTCACAGTCCCTGTCGATGTGGTCATGCAGAGGCT
ENST00000436367	ENSG00000124788	ATXN1	set16	ENSG00000124788	ATXN1	-46	2952	2983	32	CTTTTTAACAGAGCCGTTCTTCAGGTTCTTGA	0.957849	-53.9785	0.40625	1	1	1	0	1	1	4	1	1	0	17	1	B5	ATACGTTCGTTTCCTCTGGGTGGGC	18	1	B6	GTTTCACAGTCCCTGTCGATGTGGT	ATACGTTCGTTTCCTCTGGGTGGGCTTACACTCGGACCTCGTCGACATGCATTCTTTTTAACAGAGCCGTTCTTCAGGTTCTTGACCTCCTAAGTTTCGAGCTGGACTCAGTGGTTTCACAGTCCCTGTCGATGTGGT	ATACGTTCGTTTCCTCTGGGTGGGCTTACACTCGGACCTCGTCGACATGCATTCTTTTTAACAGAGCCGTTCTTCAGGTTCTTGACCTCCTAAGTTTCGAGCTGGACTCAGTGGTTTCACAGTCCCTGTCGATGTGGTTCAGGC
ENST00000436367	ENSG00000124788	ATXN1	set16	ENSG00000124788	ATXN1	-46	4261	4288	28	TGCTCTCACTGAAGGGCAGTTTGCATCT	0.942151	-54.1785	0.5	1	1	1	0	1	1	4	1	1	0	17	1	B5	ATACGTTCGTTTCCTCTGGGTGGGC	18	1	B6	GTTTCACAGTCCCTGTCGATGTGGT	ATACGTTCGTTTCCTCTGGGTGGGCTTACACTCGGACCTCGTCGACATGCATTTGCTCTCACTGAAGGGCAGTTTGCATCTCCTCCTAAGTTTCGAGCTGGACTCAGTGGTTTCACAGTCCCTGTCGATGTGGT	ATACGTTCGTTTCCTCTGGGTGGGCTTACACTCGGACCTCGTCGACATGCATTTGCTCTCACTGAAGGGCAGTTTGCATCTCCTCCTAAGTTTCGAGCTGGACTCAGTGGTTTCACAGTCCCTGTCGATGTGGTAATCTTATAT
ENST00000436367	ENSG00000124788	ATXN1	set16	ENSG00000124788	ATXN1	-46	6697	6721	25	TGCAAACAGGAGGCTCCTGCCCTCT	0.962151	-53.0785	0.6	1	1	1	0	1	1	4	1	1	0	17	1	B5	ATACGTTCGTTTCCTCTGGGTGGGC	18	1	B6	GTTTCACAGTCCCTGTCGATGTGGT	ATACGTTCGTTTCCTCTGGGTGGGCTTACACTCGGACCTCGTCGACATGCATTTGCAAACAGGAGGCTCCTGCCCTCTCCTCCTAAGTTTCGAGCTGGACTCAGTGGTTTCACAGTCCCTGTCGATGTGGT	ATACGTTCGTTTCCTCTGGGTGGGCTTACACTCGGACCTCGTCGACATGCATTTGCAAACAGGAGGCTCCTGCCCTCTCCTCCTAAGTTTCGAGCTGGACTCAGTGGTTTCACAGTCCCTGTCGATGTGGTTGGTAGCCGGAGG
ENST00000436367	ENSG00000124788	ATXN1	set16	ENSG00000124788	ATXN1	-46	5945	5976	32	TAGTGTTGGTTTAGTGGATCCAGTCAATTCAA	0.987849	-53.8785	0.375	1	1	1	1	1	1	5	1	1	0	17	1	B5	ATACGTTCGTTTCCTCTGGGTGGGC	18	1	B6	GTTTCACAGTCCCTGTCGATGTGGT	ATACGTTCGTTTCCTCTGGGTGGGCTTACACTCGGACCTCGTCGACATGCATTTAGTGTTGGTTTAGTGGATCCAGTCAATTCAACCTCCTAAGTTTCGAGCTGGACTCAGTGGTTTCACAGTCCCTGTCGATGTGGT	ATACGTTCGTTTCCTCTGGGTGGGCTTACACTCGGACCTCGTCGACATGCATTTAGTGTTGGTTTAGTGGATCCAGTCAATTCAACCTCCTAAGTTTCGAGCTGGACTCAGTGGTTTCACAGTCCCTGTCGATGTGGTGCTTAA
ENST00000436367	ENSG00000124788	ATXN1	set16	ENSG00000124788	ATXN1	-46	5676	5701	26	GCAAGAATGAGCCCACCCAGCTCTCT	0.972151	-53.3785	0.576923	1	1	1	1	1	1	5	1	1	0	17	1	B5	ATACGTTCGTTTCCTCTGGGTGGGC	18	1	B6	GTTTCACAGTCCCTGTCGATGTGGT	ATACGTTCGTTTCCTCTGGGTGGGCTTACACTCGGACCTCGTCGACATGCATTGCAAGAATGAGCCCACCCAGCTCTCTCCTCCTAAGTTTCGAGCTGGACTCAGTGGTTTCACAGTCCCTGTCGATGTGGT	ATACGTTCGTTTCCTCTGGGTGGGCTTACACTCGGACCTCGTCGACATGCATTGCAAGAATGAGCCCACCCAGCTCTCTCCTCCTAAGTTTCGAGCTGGACTCAGTGGTTTCACAGTCCCTGTCGATGTGGTGTTGTGACCTGG
ENST00000436367	ENSG00000124788	ATXN1	set16	ENSG00000124788	ATXN1	-46	7143	7171	29	GATCTGAGGTAAGTGGCATCCATCTCTGT	0.932151	-54.5785	0.482759	1	1	1	0	1	1	4	1	1	0	17	1	B5	ATACGTTCGTTTCCTCTGGGTGGGC	18	1	B6	GTTTCACAGTCCCTGTCGATGTGGT	ATACGTTCGTTTCCTCTGGGTGGGCTTACACTCGGACCTCGTCGACATGCATTGATCTGAGGTAAGTGGCATCCATCTCTGTCCTCCTAAGTTTCGAGCTGGACTCAGTGGTTTCACAGTCCCTGTCGATGTGGT	ATACGTTCGTTTCCTCTGGGTGGGCTTACACTCGGACCTCGTCGACATGCATTGATCTGAGGTAAGTGGCATCCATCTCTGTCCTCCTAAGTTTCGAGCTGGACTCAGTGGTTTCACAGTCCCTGTCGATGTGGTGCCGCGGCG
ENST00000436367	ENSG00000124788	ATXN1	set16	ENSG00000124788	ATXN1	-46	3117	3147	31	AATCCCATTTTCTCTGGAAACTTCAGTTCGC	0.947849	-53.4785	0.419355	1	1	1	1	1	1	5	1	1	0	17	1	B5	ATACGTTCGTTTCCTCTGGGTGGGC	18	1	B6	GTTTCACAGTCCCTGTCGATGTGGT	ATACGTTCGTTTCCTCTGGGTGGGCTTACACTCGGACCTCGTCGACATGCATTAATCCCATTTTCTCTGGAAACTTCAGTTCGCCCTCCTAAGTTTCGAGCTGGACTCAGTGGTTTCACAGTCCCTGTCGATGTGGT	ATACGTTCGTTTCCTCTGGGTGGGCTTACACTCGGACCTCGTCGACATGCATTAATCCCATTTTCTCTGGAAACTTCAGTTCGCCCTCCTAAGTTTCGAGCTGGACTCAGTGGTTTCACAGTCCCTGTCGATGTGGTCATAGAC
ENST00000436367	ENSG00000124788	ATXN1	set16	ENSG00000124788	ATXN1	-46	3089	3115	27	ATTCTCAGAGAGCATCTGGGCACTCCC	0.892151	-54.5785	0.555556	1	1	1	1	1	1	5	1	1	0	17	1	B5	ATACGTTCGTTTCCTCTGGGTGGGC	18	1	B6	GTTTCACAGTCCCTGTCGATGTGGT	ATACGTTCGTTTCCTCTGGGTGGGCTTACACTCGGACCTCGTCGACATGCATTATTCTCAGAGAGCATCTGGGCACTCCCCCTCCTAAGTTTCGAGCTGGACTCAGTGGTTTCACAGTCCCTGTCGATGTGGT	ATACGTTCGTTTCCTCTGGGTGGGCTTACACTCGGACCTCGTCGACATGCATTATTCTCAGAGAGCATCTGGGCACTCCCCCTCCTAAGTTTCGAGCTGGACTCAGTGGTTTCACAGTCCCTGTCGATGTGGTTAGCATAGAAT
ENST00000436367	ENSG00000124788	ATXN1	set16	ENSG00000124788	ATXN1	-46	1715	1740	26	AGGGTGAGCGTGTGTGGGATCATCGT	0.962151	-53.0785	0.576923	1	1	1	0	1	1	4	1	1	0	17	1	B5	ATACGTTCGTTTCCTCTGGGTGGGC	18	1	B6	GTTTCACAGTCCCTGTCGATGTGGT	ATACGTTCGTTTCCTCTGGGTGGGCTTACACTCGGACCTCGTCGACATGCATTAGGGTGAGCGTGTGTGGGATCATCGTCCTCCTAAGTTTCGAGCTGGACTCAGTGGTTTCACAGTCCCTGTCGATGTGGT	ATACGTTCGTTTCCTCTGGGTGGGCTTACACTCGGACCTCGTCGACATGCATTAGGGTGAGCGTGTGTGGGATCATCGTCCTCCTAAGTTTCGAGCTGGACTCAGTGGTTTCACAGTCCCTGTCGATGTGGTCGTCGCAGAACA
ENST00000436367	ENSG00000124788	ATXN1	set16	ENSG00000124788	ATXN1	-46	3485	3511	27	ATATGCACCAGTCTCCTGCGACACACC	0.922151	-53.8785	0.555556	1	1	1	1	1	1	5	1	1	0	17	1	B5	ATACGTTCGTTTCCTCTGGGTGGGC	18	1	B6	GTTTCACAGTCCCTGTCGATGTGGT	ATACGTTCGTTTCCTCTGGGTGGGCTTACACTCGGACCTCGTCGACATGCATTATATGCACCAGTCTCCTGCGACACACCCCTCCTAAGTTTCGAGCTGGACTCAGTGGTTTCACAGTCCCTGTCGATGTGGT	ATACGTTCGTTTCCTCTGGGTGGGCTTACACTCGGACCTCGTCGACATGCATTATATGCACCAGTCTCCTGCGACACACCCCTCCTAAGTTTCGAGCTGGACTCAGTGGTTTCACAGTCCCTGTCGATGTGGTAGAGCCCGAGG
ENST00000436367	ENSG00000124788	ATXN1	set16	ENSG00000124788	ATXN1	-46	2727	2754	28	CTGTCTTCAATCCTCTCTACGGTGCTGG	0.967849	-53.2785	0.535714	1	1	1	0	1	1	4	1	1	0	17	1	B5	ATACGTTCGTTTCCTCTGGGTGGGC	18	1	B6	GTTTCACAGTCCCTGTCGATGTGGT	ATACGTTCGTTTCCTCTGGGTGGGCTTACACTCGGACCTCGTCGACATGCATTCTGTCTTCAATCCTCTCTACGGTGCTGGCCTCCTAAGTTTCGAGCTGGACTCAGTGGTTTCACAGTCCCTGTCGATGTGGT	ATACGTTCGTTTCCTCTGGGTGGGCTTACACTCGGACCTCGTCGACATGCATTCTGTCTTCAATCCTCTCTACGGTGCTGGCCTCCTAAGTTTCGAGCTGGACTCAGTGGTTTCACAGTCCCTGTCGATGTGGTTCAATTTAAA
ENST00000436367	ENSG00000124788	ATXN1	set16	ENSG00000124788	ATXN1	-46	2696	2725	30	GTCGATCTTCAGGTCGTTGCTTATCTCTGC	0.872151	-55.7785	0.5	1	1	1	0	1	1	4	1	1	0	17	1	B5	ATACGTTCGTTTCCTCTGGGTGGGC	18	1	B6	GTTTCACAGTCCCTGTCGATGTGGT	ATACGTTCGTTTCCTCTGGGTGGGCTTACACTCGGACCTCGTCGACATGCATTGTCGATCTTCAGGTCGTTGCTTATCTCTGCCCTCCTAAGTTTCGAGCTGGACTCAGTGGTTTCACAGTCCCTGTCGATGTGGT	ATACGTTCGTTTCCTCTGGGTGGGCTTACACTCGGACCTCGTCGACATGCATTGTCGATCTTCAGGTCGTTGCTTATCTCTGCCCTCCTAAGTTTCGAGCTGGACTCAGTGGTTTCACAGTCCCTGTCGATGTGGTGCAAACCC
ENST00000436367	ENSG00000124788	ATXN1	set16	ENSG00000124788	ATXN1	-46	4097	4121	25	TCCCTGTCCACCACAACACCCTGGT	0.922151	-52.7785	0.6	1	1	1	0	1	1	4	1	1	0	17	1	B5	ATACGTTCGTTTCCTCTGGGTGGGC	18	1	B6	GTTTCACAGTCCCTGTCGATGTGGT	ATACGTTCGTTTCCTCTGGGTGGGCTTACACTCGGACCTCGTCGACATGCATTTCCCTGTCCACCACAACACCCTGGTCCTCCTAAGTTTCGAGCTGGACTCAGTGGTTTCACAGTCCCTGTCGATGTGGT	ATACGTTCGTTTCCTCTGGGTGGGCTTACACTCGGACCTCGTCGACATGCATTTCCCTGTCCACCACAACACCCTGGTCCTCCTAAGTTTCGAGCTGGACTCAGTGGTTTCACAGTCCCTGTCGATGTGGTCAAGCCTTCGACA
ENST00000436367	ENSG00000124788	ATXN1	set16	ENSG00000124788	ATXN1	-46	1638	1665	28	CCGGTGTTCTGCGGAGAACTGGAAATGT	0.952151	-53.5785	0.535714	1	1	1	0	1	1	4	1	1	0	17	1	B5	ATACGTTCGTTTCCTCTGGGTGGGC	18	1	B6	GTTTCACAGTCCCTGTCGATGTGGT	ATACGTTCGTTTCCTCTGGGTGGGCTTACACTCGGACCTCGTCGACATGCATTCCGGTGTTCTGCGGAGAACTGGAAATGTCCTCCTAAGTTTCGAGCTGGACTCAGTGGTTTCACAGTCCCTGTCGATGTGGT	ATACGTTCGTTTCCTCTGGGTGGGCTTACACTCGGACCTCGTCGACATGCATTCCGGTGTTCTGCGGAGAACTGGAAATGTCCTCCTAAGTTTCGAGCTGGACTCAGTGGTTTCACAGTCCCTGTCGATGTGGTATCGTTGTAG
ENST00000436367	ENSG00000124788	ATXN1	set16	ENSG00000124788	ATXN1	-46	6665	6695	31	TGCGTTCTTCCTATTTGAAGAGAAAGCTGCC	0.872151	-55.6785	0.451613	1	1	1	1	1	1	5	1	1	0	17	1	B5	ATACGTTCGTTTCCTCTGGGTGGGC	18	1	B6	GTTTCACAGTCCCTGTCGATGTGGT	ATACGTTCGTTTCCTCTGGGTGGGCTTACACTCGGACCTCGTCGACATGCATTTGCGTTCTTCCTATTTGAAGAGAAAGCTGCCCCTCCTAAGTTTCGAGCTGGACTCAGTGGTTTCACAGTCCCTGTCGATGTGGT	ATACGTTCGTTTCCTCTGGGTGGGCTTACACTCGGACCTCGTCGACATGCATTTGCGTTCTTCCTATTTGAAGAGAAAGCTGCCCCTCCTAAGTTTCGAGCTGGACTCAGTGGTTTCACAGTCCCTGTCGATGTGGTAAGCTGT
ENST00000436367	ENSG00000124788	ATXN1	set16	ENSG00000124788	ATXN1	-46	6455	6480	26	TTGACTCCAGGCTACATGGCTCCAGA	0.937849	-52.3785	0.538462	1	1	1	1	1	1	5	1	1	0	17	1	B5	ATACGTTCGTTTCCTCTGGGTGGGC	18	1	B6	GTTTCACAGTCCCTGTCGATGTGGT	ATACGTTCGTTTCCTCTGGGTGGGCTTACACTCGGACCTCGTCGACATGCATTTTGACTCCAGGCTACATGGCTCCAGACCTCCTAAGTTTCGAGCTGGACTCAGTGGTTTCACAGTCCCTGTCGATGTGGT	ATACGTTCGTTTCCTCTGGGTGGGCTTACACTCGGACCTCGTCGACATGCATTTTGACTCCAGGCTACATGGCTCCAGACCTCCTAAGTTTCGAGCTGGACTCAGTGGTTTCACAGTCCCTGTCGATGTGGTTTCCCGAAGTTT
ENST00000436367	ENSG00000124788	ATXN1	set16	ENSG00000124788	ATXN1	-46	2075	2099	25	GATGAGTGGCCTGTTGCACCTCCAG	0.867849	-51.1785	0.6	1	1	1	0	1	1	4	1	1	0	17	1	B5	ATACGTTCGTTTCCTCTGGGTGGGC	18	1	B6	GTTTCACAGTCCCTGTCGATGTGGT	ATACGTTCGTTTCCTCTGGGTGGGCTTACACTCGGACCTCGTCGACATGCATTGATGAGTGGCCTGTTGCACCTCCAGCCTCCTAAGTTTCGAGCTGGACTCAGTGGTTTCACAGTCCCTGTCGATGTGGT	ATACGTTCGTTTCCTCTGGGTGGGCTTACACTCGGACCTCGTCGACATGCATTGATGAGTGGCCTGTTGCACCTCCAGCCTCCTAAGTTTCGAGCTGGACTCAGTGGTTTCACAGTCCCTGTCGATGTGGTGAAACAGGGATCT
ENST00000436367	ENSG00000124788	ATXN1	set16	ENSG00000124788	ATXN1	-46	2049	2073	25	TCAGCTGCGGGCGTGTTGCTGTTGG	0.962151	-52.7785	0.64	1	1	1	0	1	1	4	1	1	0	17	1	B5	ATACGTTCGTTTCCTCTGGGTGGGC	18	1	B6	GTTTCACAGTCCCTGTCGATGTGGT	ATACGTTCGTTTCCTCTGGGTGGGCTTACACTCGGACCTCGTCGACATGCATTTCAGCTGCGGGCGTGTTGCTGTTGGCCTCCTAAGTTTCGAGCTGGACTCAGTGGTTTCACAGTCCCTGTCGATGTGGT	ATACGTTCGTTTCCTCTGGGTGGGCTTACACTCGGACCTCGTCGACATGCATTTCAGCTGCGGGCGTGTTGCTGTTGGCCTCCTAAGTTTCGAGCTGGACTCAGTGGTTTCACAGTCCCTGTCGATGTGGTTCGACAAAATCCA
ENST00000436367	ENSG00000124788	ATXN1	set16	ENSG00000124788	ATXN1	-46	1946	1970	25	GCCTGGACTCGTACGGGTGAGGAAC	0.977849	-52.4785	0.64	1	1	1	0	1	1	4	1	1	0	17	1	B5	ATACGTTCGTTTCCTCTGGGTGGGC	18	1	B6	GTTTCACAGTCCCTGTCGATGTGGT	ATACGTTCGTTTCCTCTGGGTGGGCTTACACTCGGACCTCGTCGACATGCATTGCCTGGACTCGTACGGGTGAGGAACCCTCCTAAGTTTCGAGCTGGACTCAGTGGTTTCACAGTCCCTGTCGATGTGGT	ATACGTTCGTTTCCTCTGGGTGGGCTTACACTCGGACCTCGTCGACATGCATTGCCTGGACTCGTACGGGTGAGGAACCCTCCTAAGTTTCGAGCTGGACTCAGTGGTTTCACAGTCCCTGTCGATGTGGTTCCCTTGCTACCC
ENST00000436367	ENSG00000124788	ATXN1	set16	ENSG00000124788	ATXN1	-46	1843	1868	26	CGTTCAGGACCTCCTTGGCCTGGATG	0.952151	-53.0785	0.615385	1	1	1	0	1	1	4	1	1	0	17	1	B5	ATACGTTCGTTTCCTCTGGGTGGGC	18	1	B6	GTTTCACAGTCCCTGTCGATGTGGT	ATACGTTCGTTTCCTCTGGGTGGGCTTACACTCGGACCTCGTCGACATGCATTCGTTCAGGACCTCCTTGGCCTGGATGCCTCCTAAGTTTCGAGCTGGACTCAGTGGTTTCACAGTCCCTGTCGATGTGGT	ATACGTTCGTTTCCTCTGGGTGGGCTTACACTCGGACCTCGTCGACATGCATTCGTTCAGGACCTCCTTGGCCTGGATGCCTCCTAAGTTTCGAGCTGGACTCAGTGGTTTCACAGTCCCTGTCGATGTGGTACTGAACGACGA
ENST00000436367	ENSG00000124788	ATXN1	set16	ENSG00000124788	ATXN1	-46	1766	1790	25	AGTGGCTGCCGGAGTCGGCGTATTG	0.977849	-52.2785	0.64	1	1	1	0	1	1	4	1	1	0	17	1	B5	ATACGTTCGTTTCCTCTGGGTGGGC	18	1	B6	GTTTCACAGTCCCTGTCGATGTGGT	ATACGTTCGTTTCCTCTGGGTGGGCTTACACTCGGACCTCGTCGACATGCATTAGTGGCTGCCGGAGTCGGCGTATTGCCTCCTAAGTTTCGAGCTGGACTCAGTGGTTTCACAGTCCCTGTCGATGTGGT	ATACGTTCGTTTCCTCTGGGTGGGCTTACACTCGGACCTCGTCGACATGCATTAGTGGCTGCCGGAGTCGGCGTATTGCCTCCTAAGTTTCGAGCTGGACTCAGTGGTTTCACAGTCCCTGTCGATGTGGTTCACACAGTGCGT
ENST00000436367	ENSG00000124788	ATXN1	set16	ENSG00000124788	ATXN1	-46	3060	3087	28	TGGTTGATTCCGTTTTCCTGCTCGGCAT	0.987849	-52.8785	0.5	1	1	1	0	1	1	4	1	1	0	17	1	B5	ATACGTTCGTTTCCTCTGGGTGGGC	18	1	B6	GTTTCACAGTCCCTGTCGATGTGGT	ATACGTTCGTTTCCTCTGGGTGGGCTTACACTCGGACCTCGTCGACATGCATTTGGTTGATTCCGTTTTCCTGCTCGGCATCCTCCTAAGTTTCGAGCTGGACTCAGTGGTTTCACAGTCCCTGTCGATGTGGT	ATACGTTCGTTTCCTCTGGGTGGGCTTACACTCGGACCTCGTCGACATGCATTTGGTTGATTCCGTTTTCCTGCTCGGCATCCTCCTAAGTTTCGAGCTGGACTCAGTGGTTTCACAGTCCCTGTCGATGTGGTTCCACACGTT
ENST00000436367	ENSG00000124788	ATXN1	set16	ENSG00000124788	ATXN1	-46	9878	9908	31	TTGAAACCTCCTTTCGGCTGACACTAATTTG	0.917849	-52.9785	0.419355	1	1	1	1	1	0	4	1	1	0	17	1	B5	ATACGTTCGTTTCCTCTGGGTGGGC	18	1	B6	GTTTCACAGTCCCTGTCGATGTGGT	ATACGTTCGTTTCCTCTGGGTGGGCTTACACTCGGACCTCGTCGACATGCATTTTGAAACCTCCTTTCGGCTGACACTAATTTGCCTCCTAAGTTTCGAGCTGGACTCAGTGGTTTCACAGTCCCTGTCGATGTGGT	ATACGTTCGTTTCCTCTGGGTGGGCTTACACTCGGACCTCGTCGACATGCATTTTGAAACCTCCTTTCGGCTGACACTAATTTGCCTCCTAAGTTTCGAGCTGGACTCAGTGGTTTCACAGTCCCTGTCGATGTGGTCAAGGGG
ENST00000436367	ENSG00000124788	ATXN1	set16	ENSG00000124788	ATXN1	-46	1611	1636	26	GACGTACTGGTTCTGCTGGGCTGGTG	0.932151	-53.4785	0.615385	1	1	1	0	1	1	4	1	1	0	17	1	B5	ATACGTTCGTTTCCTCTGGGTGGGC	18	1	B6	GTTTCACAGTCCCTGTCGATGTGGT	ATACGTTCGTTTCCTCTGGGTGGGCTTACACTCGGACCTCGTCGACATGCATTGACGTACTGGTTCTGCTGGGCTGGTGCCTCCTAAGTTTCGAGCTGGACTCAGTGGTTTCACAGTCCCTGTCGATGTGGT	ATACGTTCGTTTCCTCTGGGTGGGCTTACACTCGGACCTCGTCGACATGCATTGACGTACTGGTTCTGCTGGGCTGGTGCCTCCTAAGTTTCGAGCTGGACTCAGTGGTTTCACAGTCCCTGTCGATGTGGTGCTACGGGGGAG
ENST00000436367	ENSG00000124788	ATXN1	set16	ENSG00000124788	ATXN1	-46	1432	1456	25	GCTCAGACTGCCCATGTTGGCCAGC	0.902151	-53.5785	0.64	1	1	1	0	1	1	4	1	1	0	17	1	B5	ATACGTTCGTTTCCTCTGGGTGGGC	18	1	B6	GTTTCACAGTCCCTGTCGATGTGGT	ATACGTTCGTTTCCTCTGGGTGGGCTTACACTCGGACCTCGTCGACATGCATTGCTCAGACTGCCCATGTTGGCCAGCCCTCCTAAGTTTCGAGCTGGACTCAGTGGTTTCACAGTCCCTGTCGATGTGGT	ATACGTTCGTTTCCTCTGGGTGGGCTTACACTCGGACCTCGTCGACATGCATTGCTCAGACTGCCCATGTTGGCCAGCCCTCCTAAGTTTCGAGCTGGACTCAGTGGTTTCACAGTCCCTGTCGATGTGGTTCCTACGTTGGTA
ENST00000436367	ENSG00000124788	ATXN1	set16	ENSG00000124788	ATXN1	-46	912	937	26	CTTGGGAGGCAGGCATTCGTTGCTCC	0.922151	-53.4785	0.615385	1	1	1	0	1	1	4	1	1	0	17	1	B5	ATACGTTCGTTTCCTCTGGGTGGGC	18	1	B6	GTTTCACAGTCCCTGTCGATGTGGT	ATACGTTCGTTTCCTCTGGGTGGGCTTACACTCGGACCTCGTCGACATGCATTCTTGGGAGGCAGGCATTCGTTGCTCCCCTCCTAAGTTTCGAGCTGGACTCAGTGGTTTCACAGTCCCTGTCGATGTGGT	ATACGTTCGTTTCCTCTGGGTGGGCTTACACTCGGACCTCGTCGACATGCATTCTTGGGAGGCAGGCATTCGTTGCTCCCCTCCTAAGTTTCGAGCTGGACTCAGTGGTTTCACAGTCCCTGTCGATGTGGTCTGACATTGATA
ENST00000436367	ENSG00000124788	ATXN1	set16	ENSG00000124788	ATXN1	-46	6747	6772	26	ACAGAAGCGGTGACAGAGGCTGCTCT	0.972151	-53.6785	0.576923	1	1	1	1	1	1	5	1	1	0	17	1	B5	ATACGTTCGTTTCCTCTGGGTGGGC	18	1	B6	GTTTCACAGTCCCTGTCGATGTGGT	ATACGTTCGTTTCCTCTGGGTGGGCTTACACTCGGACCTCGTCGACATGCATTACAGAAGCGGTGACAGAGGCTGCTCTCCTCCTAAGTTTCGAGCTGGACTCAGTGGTTTCACAGTCCCTGTCGATGTGGT	ATACGTTCGTTTCCTCTGGGTGGGCTTACACTCGGACCTCGTCGACATGCATTACAGAAGCGGTGACAGAGGCTGCTCTCCTCCTAAGTTTCGAGCTGGACTCAGTGGTTTCACAGTCCCTGTCGATGTGGTCCTCTCATCCGT
ENST00000436367	ENSG00000124788	ATXN1	set16	ENSG00000124788	ATXN1	-46	7921	7948	28	GACCAGTCTGTTGAGCTGCTTGTGGTTC	0.912151	-54.4785	0.535714	1	1	1	0	1	1	4	1	1	0	17	1	B5	ATACGTTCGTTTCCTCTGGGTGGGC	18	1	B6	GTTTCACAGTCCCTGTCGATGTGGT	ATACGTTCGTTTCCTCTGGGTGGGCTTACACTCGGACCTCGTCGACATGCATTGACCAGTCTGTTGAGCTGCTTGTGGTTCCCTCCTAAGTTTCGAGCTGGACTCAGTGGTTTCACAGTCCCTGTCGATGTGGT	ATACGTTCGTTTCCTCTGGGTGGGCTTACACTCGGACCTCGTCGACATGCATTGACCAGTCTGTTGAGCTGCTTGTGGTTCCCTCCTAAGTTTCGAGCTGGACTCAGTGGTTTCACAGTCCCTGTCGATGTGGTTGGAAGGAAG
ENST00000436367	ENSG00000124788	ATXN1	set16	ENSG00000124788	ATXN1	-46	7402	7429	28	TGTGAAAGGTTCCGCAGAGTCCCTTTAG	0.887849	-52.1785	0.5	1	1	1	0	1	1	4	1	1	0	17	1	B5	ATACGTTCGTTTCCTCTGGGTGGGC	18	1	B6	GTTTCACAGTCCCTGTCGATGTGGT	ATACGTTCGTTTCCTCTGGGTGGGCTTACACTCGGACCTCGTCGACATGCATTTGTGAAAGGTTCCGCAGAGTCCCTTTAGCCTCCTAAGTTTCGAGCTGGACTCAGTGGTTTCACAGTCCCTGTCGATGTGGT	ATACGTTCGTTTCCTCTGGGTGGGCTTACACTCGGACCTCGTCGACATGCATTTGTGAAAGGTTCCGCAGAGTCCCTTTAGCCTCCTAAGTTTCGAGCTGGACTCAGTGGTTTCACAGTCCCTGTCGATGTGGTTACGCTAAGC
ENST00000436367	ENSG00000124788	ATXN1	set16	ENSG00000124788	ATXN1	-46	3850	3879	30	AAGCTGGGTTCCTGATGTTGATTTTGCACG	0.942151	-53.9785	0.466667	1	1	1	0	1	1	4	1	1	0	17	1	B5	ATACGTTCGTTTCCTCTGGGTGGGC	18	1	B6	GTTTCACAGTCCCTGTCGATGTGGT	ATACGTTCGTTTCCTCTGGGTGGGCTTACACTCGGACCTCGTCGACATGCATTAAGCTGGGTTCCTGATGTTGATTTTGCACGCCTCCTAAGTTTCGAGCTGGACTCAGTGGTTTCACAGTCCCTGTCGATGTGGT	ATACGTTCGTTTCCTCTGGGTGGGCTTACACTCGGACCTCGTCGACATGCATTAAGCTGGGTTCCTGATGTTGATTTTGCACGCCTCCTAAGTTTCGAGCTGGACTCAGTGGTTTCACAGTCCCTGTCGATGTGGTTTCCTTAC
ENST00000436367	ENSG00000124788	ATXN1	set16	ENSG00000124788	ATXN1	-46	9972	9996	25	TCAGAGATGGCTCTGGAGCCAGGAC	0.967849	-52.7785	0.6	1	1	1	1	1	1	5	1	1	0	17	1	B5	ATACGTTCGTTTCCTCTGGGTGGGC	18	1	B6	GTTTCACAGTCCCTGTCGATGTGGT	ATACGTTCGTTTCCTCTGGGTGGGCTTACACTCGGACCTCGTCGACATGCATTTCAGAGATGGCTCTGGAGCCAGGACCCTCCTAAGTTTCGAGCTGGACTCAGTGGTTTCACAGTCCCTGTCGATGTGGT	ATACGTTCGTTTCCTCTGGGTGGGCTTACACTCGGACCTCGTCGACATGCATTTCAGAGATGGCTCTGGAGCCAGGACCCTCCTAAGTTTCGAGCTGGACTCAGTGGTTTCACAGTCCCTGTCGATGTGGTAACTATCTTACCC
ENST00000436367	ENSG00000124788	ATXN1	set16	ENSG00000124788	ATXN1	-46	9665	9694	30	CGAGCTTCTTGGTAACTGCTCTGAAGACAA	0.992151	-54.3785	0.466667	1	1	1	1	1	1	5	1	1	0	17	1	B5	ATACGTTCGTTTCCTCTGGGTGGGC	18	1	B6	GTTTCACAGTCCCTGTCGATGTGGT	ATACGTTCGTTTCCTCTGGGTGGGCTTACACTCGGACCTCGTCGACATGCATTCGAGCTTCTTGGTAACTGCTCTGAAGACAACCTCCTAAGTTTCGAGCTGGACTCAGTGGTTTCACAGTCCCTGTCGATGTGGT	ATACGTTCGTTTCCTCTGGGTGGGCTTACACTCGGACCTCGTCGACATGCATTCGAGCTTCTTGGTAACTGCTCTGAAGACAACCTCCTAAGTTTCGAGCTGGACTCAGTGGTTTCACAGTCCCTGTCGATGTGGTAGATTTAG
ENST00000436367	ENSG00000124788	ATXN1	set16	ENSG00000124788	ATXN1	-46	9634	9663	30	AGCTTGAGCTAGTGTCACCTAATACTTGGT	0.977849	-53.8785	0.433333	1	1	1	1	1	1	5	1	1	0	17	1	B5	ATACGTTCGTTTCCTCTGGGTGGGC	18	1	B6	GTTTCACAGTCCCTGTCGATGTGGT	ATACGTTCGTTTCCTCTGGGTGGGCTTACACTCGGACCTCGTCGACATGCATTAGCTTGAGCTAGTGTCACCTAATACTTGGTCCTCCTAAGTTTCGAGCTGGACTCAGTGGTTTCACAGTCCCTGTCGATGTGGT	ATACGTTCGTTTCCTCTGGGTGGGCTTACACTCGGACCTCGTCGACATGCATTAGCTTGAGCTAGTGTCACCTAATACTTGGTCCTCCTAAGTTTCGAGCTGGACTCAGTGGTTTCACAGTCCCTGTCGATGTGGTCTCGTCAC
ENST00000436367	ENSG00000124788	ATXN1	set16	ENSG00000124788	ATXN1	-46	9602	9632	31	TTCTGGAGGACAGTATGTTATCTTGGTAAGG	0.977849	-53.7785	0.419355	1	1	1	1	1	1	5	1	1	0	17	1	B5	ATACGTTCGTTTCCTCTGGGTGGGC	18	1	B6	GTTTCACAGTCCCTGTCGATGTGGT	ATACGTTCGTTTCCTCTGGGTGGGCTTACACTCGGACCTCGTCGACATGCATTTTCTGGAGGACAGTATGTTATCTTGGTAAGGCCTCCTAAGTTTCGAGCTGGACTCAGTGGTTTCACAGTCCCTGTCGATGTGGT	ATACGTTCGTTTCCTCTGGGTGGGCTTACACTCGGACCTCGTCGACATGCATTTTCTGGAGGACAGTATGTTATCTTGGTAAGGCCTCCTAAGTTTCGAGCTGGACTCAGTGGTTTCACAGTCCCTGTCGATGTGGTTGTGCGA
ENST00000436367	ENSG00000124788	ATXN1	set16	ENSG00000124788	ATXN1	-46	10035	10058	24	TGGCCTGTGGGAGGCATATGGTGG	0.917849	-50.8785	0.625	1	1	1	0	1	1	4	1	1	0	17	1	B5	ATACGTTCGTTTCCTCTGGGTGGGC	18	1	B6	GTTTCACAGTCCCTGTCGATGTGGT	ATACGTTCGTTTCCTCTGGGTGGGCTTACACTCGGACCTCGTCGACATGCATTTGGCCTGTGGGAGGCATATGGTGGCCTCCTAAGTTTCGAGCTGGACTCAGTGGTTTCACAGTCCCTGTCGATGTGGT	ATACGTTCGTTTCCTCTGGGTGGGCTTACACTCGGACCTCGTCGACATGCATTTGGCCTGTGGGAGGCATATGGTGGCCTCCTAAGTTTCGAGCTGGACTCAGTGGTTTCACAGTCCCTGTCGATGTGGTACTGCGGTACTGTT
ENST00000436367	ENSG00000124788	ATXN1	set16	ENSG00000124788	ATXN1	-46	7983	8008	26	TCTGCTGGCCCTGTTTTCACCTGGTG	0.982151	-52.6785	0.576923	1	1	1	0	1	1	4	1	1	0	17	1	B5	ATACGTTCGTTTCCTCTGGGTGGGC	18	1	B6	GTTTCACAGTCCCTGTCGATGTGGT	ATACGTTCGTTTCCTCTGGGTGGGCTTACACTCGGACCTCGTCGACATGCATTTCTGCTGGCCCTGTTTTCACCTGGTGCCTCCTAAGTTTCGAGCTGGACTCAGTGGTTTCACAGTCCCTGTCGATGTGGT	ATACGTTCGTTTCCTCTGGGTGGGCTTACACTCGGACCTCGTCGACATGCATTTCTGCTGGCCCTGTTTTCACCTGGTGCCTCCTAAGTTTCGAGCTGGACTCAGTGGTTTCACAGTCCCTGTCGATGTGGTAATCTGGTGGCA
ENST00000436367	ENSG00000124788	ATXN1	set16	ENSG00000124788	ATXN1	-46	9849	9876	28	GTTTAGAGTTGAGCAGTTCAGGCTGGGG	0.952151	-53.8785	0.535714	1	1	1	0	1	1	4	1	1	0	17	1	B5	ATACGTTCGTTTCCTCTGGGTGGGC	18	1	B6	GTTTCACAGTCCCTGTCGATGTGGT	ATACGTTCGTTTCCTCTGGGTGGGCTTACACTCGGACCTCGTCGACATGCATTGTTTAGAGTTGAGCAGTTCAGGCTGGGGCCTCCTAAGTTTCGAGCTGGACTCAGTGGTTTCACAGTCCCTGTCGATGTGGT	ATACGTTCGTTTCCTCTGGGTGGGCTTACACTCGGACCTCGTCGACATGCATTGTTTAGAGTTGAGCAGTTCAGGCTGGGGCCTCCTAAGTTTCGAGCTGGACTCAGTGGTTTCACAGTCCCTGTCGATGTGGTCTTTAGGAGC
ENST00000436367	ENSG00000124788	ATXN1	set16	ENSG00000124788	ATXN1	-46	2603	2631	29	ATGATGGAGCCTTTCATGAAGTAGGGAGG	0.962151	-53.8785	0.482759	1	1	1	1	1	1	5	1	1	0	17	1	B5	ATACGTTCGTTTCCTCTGGGTGGGC	18	1	B6	GTTTCACAGTCCCTGTCGATGTGGT	ATACGTTCGTTTCCTCTGGGTGGGCTTACACTCGGACCTCGTCGACATGCATTATGATGGAGCCTTTCATGAAGTAGGGAGGCCTCCTAAGTTTCGAGCTGGACTCAGTGGTTTCACAGTCCCTGTCGATGTGGT	ATACGTTCGTTTCCTCTGGGTGGGCTTACACTCGGACCTCGTCGACATGCATTATGATGGAGCCTTTCATGAAGTAGGGAGGCCTCCTAAGTTTCGAGCTGGACTCAGTGGTTTCACAGTCCCTGTCGATGTGGTCCCGTCGAG
ENST00000436367	ENSG00000124788	ATXN1	set16	ENSG00000124788	ATXN1	-46	2101	2126	26	CGTTGAGGGTAGAAGGGGAGGCTTCA	0.947849	-52.2785	0.576923	1	1	1	1	1	1	5	1	1	0	17	1	B5	ATACGTTCGTTTCCTCTGGGTGGGC	18	1	B6	GTTTCACAGTCCCTGTCGATGTGGT	ATACGTTCGTTTCCTCTGGGTGGGCTTACACTCGGACCTCGTCGACATGCATTCGTTGAGGGTAGAAGGGGAGGCTTCACCTCCTAAGTTTCGAGCTGGACTCAGTGGTTTCACAGTCCCTGTCGATGTGGT	ATACGTTCGTTTCCTCTGGGTGGGCTTACACTCGGACCTCGTCGACATGCATTCGTTGAGGGTAGAAGGGGAGGCTTCACCTCCTAAGTTTCGAGCTGGACTCAGTGGTTTCACAGTCCCTGTCGATGTGGTCACCTAATGGGA
ENST00000436367	ENSG00000124788	ATXN1	set16	ENSG00000124788	ATXN1	-46	3620	3646	27	CTGCTTCTGTGCCGCTAGAGAAGGCAG	0.932151	-54.2785	0.592593	1	1	1	0	1	1	4	1	1	0	17	1	B5	ATACGTTCGTTTCCTCTGGGTGGGC	18	1	B6	GTTTCACAGTCCCTGTCGATGTGGT	ATACGTTCGTTTCCTCTGGGTGGGCTTACACTCGGACCTCGTCGACATGCATTCTGCTTCTGTGCCGCTAGAGAAGGCAGCCTCCTAAGTTTCGAGCTGGACTCAGTGGTTTCACAGTCCCTGTCGATGTGGT	ATACGTTCGTTTCCTCTGGGTGGGCTTACACTCGGACCTCGTCGACATGCATTCTGCTTCTGTGCCGCTAGAGAAGGCAGCCTCCTAAGTTTCGAGCTGGACTCAGTGGTTTCACAGTCCCTGTCGATGTGGTAGATTAGTACA
ENST00000436367	ENSG00000124788	ATXN1	set16	ENSG00000124788	ATXN1	-46	4002	4028	27	TATATCAGTGCAGTCAGGCCCCATAGG	0.917849	-52.0785	0.518519	1	1	1	1	0	1	4	1	1	0	17	1	B5	ATACGTTCGTTTCCTCTGGGTGGGC	18	1	B6	GTTTCACAGTCCCTGTCGATGTGGT	ATACGTTCGTTTCCTCTGGGTGGGCTTACACTCGGACCTCGTCGACATGCATTTATATCAGTGCAGTCAGGCCCCATAGGCCTCCTAAGTTTCGAGCTGGACTCAGTGGTTTCACAGTCCCTGTCGATGTGGT	ATACGTTCGTTTCCTCTGGGTGGGCTTACACTCGGACCTCGTCGACATGCATTTATATCAGTGCAGTCAGGCCCCATAGGCCTCCTAAGTTTCGAGCTGGACTCAGTGGTTTCACAGTCCCTGTCGATGTGGTTTGCTAAACTA
ENST00000436367	ENSG00000124788	ATXN1	set16	ENSG00000124788	ATXN1	-46	3881	3905	25	ATCTGACGCGTCTCCGCGATGCCCT	0.962151	-53.2785	0.64	1	1	1	0	1	1	4	1	1	0	17	1	B5	ATACGTTCGTTTCCTCTGGGTGGGC	18	1	B6	GTTTCACAGTCCCTGTCGATGTGGT	ATACGTTCGTTTCCTCTGGGTGGGCTTACACTCGGACCTCGTCGACATGCATTATCTGACGCGTCTCCGCGATGCCCTCCTCCTAAGTTTCGAGCTGGACTCAGTGGTTTCACAGTCCCTGTCGATGTGGT	ATACGTTCGTTTCCTCTGGGTGGGCTTACACTCGGACCTCGTCGACATGCATTATCTGACGCGTCTCCGCGATGCCCTCCTCCTAAGTTTCGAGCTGGACTCAGTGGTTTCACAGTCCCTGTCGATGTGGTCCCGGCAGCAAGC
ENST00000436367	ENSG00000124788	ATXN1	set16	ENSG00000124788	ATXN1	-46	2259	2283	25	TAGCCGATGACAGGGGGTTGAGTCC	0.937849	-51.8785	0.6	1	1	1	0	1	1	4	1	1	0	17	1	B5	ATACGTTCGTTTCCTCTGGGTGGGC	18	1	B6	GTTTCACAGTCCCTGTCGATGTGGT	ATACGTTCGTTTCCTCTGGGTGGGCTTACACTCGGACCTCGTCGACATGCATTTAGCCGATGACAGGGGGTTGAGTCCCCTCCTAAGTTTCGAGCTGGACTCAGTGGTTTCACAGTCCCTGTCGATGTGGT	ATACGTTCGTTTCCTCTGGGTGGGCTTACACTCGGACCTCGTCGACATGCATTTAGCCGATGACAGGGGGTTGAGTCCCCTCCTAAGTTTCGAGCTGGACTCAGTGGTTTCACAGTCCCTGTCGATGTGGTATGAACCCTTGGA
ENST00000436367	ENSG00000124788	ATXN1	set16	ENSG00000124788	ATXN1	-46	8950	8979	30	TAATGAGTCCTGTTTGATTGGTAGCCTGGA	0.962151	-54.0785	0.433333	1	1	1	0	1	1	4	1	1	0	17	1	B5	ATACGTTCGTTTCCTCTGGGTGGGC	18	1	B6	GTTTCACAGTCCCTGTCGATGTGGT	ATACGTTCGTTTCCTCTGGGTGGGCTTACACTCGGACCTCGTCGACATGCATTTAATGAGTCCTGTTTGATTGGTAGCCTGGACCTCCTAAGTTTCGAGCTGGACTCAGTGGTTTCACAGTCCCTGTCGATGTGGT	ATACGTTCGTTTCCTCTGGGTGGGCTTACACTCGGACCTCGTCGACATGCATTTAATGAGTCCTGTTTGATTGGTAGCCTGGACCTCCTAAGTTTCGAGCTGGACTCAGTGGTTTCACAGTCCCTGTCGATGTGGTTGCTGGTA
ENST00000436367	ENSG00000124788	ATXN1	set16	ENSG00000124788	ATXN1	-46	3318	3344	27	GCCTCTACTTGCCTACATTAGACCGGC	0.967849	-52.9785	0.555556	1	1	1	0	1	1	4	1	1	0	17	1	B5	ATACGTTCGTTTCCTCTGGGTGGGC	18	1	B6	GTTTCACAGTCCCTGTCGATGTGGT	ATACGTTCGTTTCCTCTGGGTGGGCTTACACTCGGACCTCGTCGACATGCATTGCCTCTACTTGCCTACATTAGACCGGCCCTCCTAAGTTTCGAGCTGGACTCAGTGGTTTCACAGTCCCTGTCGATGTGGT	ATACGTTCGTTTCCTCTGGGTGGGCTTACACTCGGACCTCGTCGACATGCATTGCCTCTACTTGCCTACATTAGACCGGCCCTCCTAAGTTTCGAGCTGGACTCAGTGGTTTCACAGTCCCTGTCGATGTGGTGCTGTGACGGG
ENST00000436367	ENSG00000124788	ATXN1	set16	ENSG00000124788	ATXN1	-46	3225	3252	28	TCTTCTGACTTCTCCAGTTTGCGGCTCT	0.977849	-53.6785	0.5	1	1	1	0	1	1	4	1	1	0	17	1	B5	ATACGTTCGTTTCCTCTGGGTGGGC	18	1	B6	GTTTCACAGTCCCTGTCGATGTGGT	ATACGTTCGTTTCCTCTGGGTGGGCTTACACTCGGACCTCGTCGACATGCATTTCTTCTGACTTCTCCAGTTTGCGGCTCTCCTCCTAAGTTTCGAGCTGGACTCAGTGGTTTCACAGTCCCTGTCGATGTGGT	ATACGTTCGTTTCCTCTGGGTGGGCTTACACTCGGACCTCGTCGACATGCATTTCTTCTGACTTCTCCAGTTTGCGGCTCTCCTCCTAAGTTTCGAGCTGGACTCAGTGGTTTCACAGTCCCTGTCGATGTGGTTATTTGCATT
ENST00000436367	ENSG00000124788	ATXN1	set16	ENSG00000124788	ATXN1	-46	3149	3173	25	TTTTGGTGAGGAAGGGCGCTGCAGG	0.887849	-51.1785	0.6	1	1	1	0	1	1	4	1	1	0	17	1	B5	ATACGTTCGTTTCCTCTGGGTGGGC	18	1	B6	GTTTCACAGTCCCTGTCGATGTGGT	ATACGTTCGTTTCCTCTGGGTGGGCTTACACTCGGACCTCGTCGACATGCATTTTTTGGTGAGGAAGGGCGCTGCAGGCCTCCTAAGTTTCGAGCTGGACTCAGTGGTTTCACAGTCCCTGTCGATGTGGT	ATACGTTCGTTTCCTCTGGGTGGGCTTACACTCGGACCTCGTCGACATGCATTTTTTGGTGAGGAAGGGCGCTGCAGGCCTCCTAAGTTTCGAGCTGGACTCAGTGGTTTCACAGTCCCTGTCGATGTGGTTTTAAGTGTACAA
ENST00000436367	ENSG00000124788	ATXN1	set16	ENSG00000124788	ATXN1	-46	1128	1154	27	AGTAGTCCAGCCCTGTGGACAATGCTT	0.987849	-52.8785	0.518519	1	1	1	1	1	1	5	1	1	0	17	1	B5	ATACGTTCGTTTCCTCTGGGTGGGC	18	1	B6	GTTTCACAGTCCCTGTCGATGTGGT	ATACGTTCGTTTCCTCTGGGTGGGCTTACACTCGGACCTCGTCGACATGCATTAGTAGTCCAGCCCTGTGGACAATGCTTCCTCCTAAGTTTCGAGCTGGACTCAGTGGTTTCACAGTCCCTGTCGATGTGGT	ATACGTTCGTTTCCTCTGGGTGGGCTTACACTCGGACCTCGTCGACATGCATTAGTAGTCCAGCCCTGTGGACAATGCTTCCTCCTAAGTTTCGAGCTGGACTCAGTGGTTTCACAGTCCCTGTCGATGTGGTTGTAACAACGT
ENST00000436367	ENSG00000124788	ATXN1	set16	ENSG00000124788	ATXN1	-46	8750	8778	29	TTCTCAAATCGCAGAATACCGAGTTCCCC	0.967849	-53.2785	0.482759	1	1	1	1	0	1	4	1	1	0	17	1	B5	ATACGTTCGTTTCCTCTGGGTGGGC	18	1	B6	GTTTCACAGTCCCTGTCGATGTGGT	ATACGTTCGTTTCCTCTGGGTGGGCTTACACTCGGACCTCGTCGACATGCATTTTCTCAAATCGCAGAATACCGAGTTCCCCCCTCCTAAGTTTCGAGCTGGACTCAGTGGTTTCACAGTCCCTGTCGATGTGGT	ATACGTTCGTTTCCTCTGGGTGGGCTTACACTCGGACCTCGTCGACATGCATTTTCTCAAATCGCAGAATACCGAGTTCCCCCCTCCTAAGTTTCGAGCTGGACTCAGTGGTTTCACAGTCCCTGTCGATGTGGTTCATAACAT
ENST00000436367	ENSG00000124788	ATXN1	set16	ENSG00000124788	ATXN1	-46	2487	2511	25	GTGACCAGGGCCTCAGGGTTGAAGT	0.967849	-52.0785	0.6	1	1	1	0	1	1	4	1	1	0	17	1	B5	ATACGTTCGTTTCCTCTGGGTGGGC	18	1	B6	GTTTCACAGTCCCTGTCGATGTGGT	ATACGTTCGTTTCCTCTGGGTGGGCTTACACTCGGACCTCGTCGACATGCATTGTGACCAGGGCCTCAGGGTTGAAGTCCTCCTAAGTTTCGAGCTGGACTCAGTGGTTTCACAGTCCCTGTCGATGTGGT	ATACGTTCGTTTCCTCTGGGTGGGCTTACACTCGGACCTCGTCGACATGCATTGTGACCAGGGCCTCAGGGTTGAAGTCCTCCTAAGTTTCGAGCTGGACTCAGTGGTTTCACAGTCCCTGTCGATGTGGTGGTCTTGGCGGCT
ENST00000436367	ENSG00000124788	ATXN1	set16	ENSG00000124788	ATXN1	-46	9156	9185	30	AGTTTCCACTGTCCGGCTTGATTTTTGGAC	0.922151	-54.2785	0.466667	1	1	1	0	1	1	4	1	1	0	17	1	B5	ATACGTTCGTTTCCTCTGGGTGGGC	18	1	B6	GTTTCACAGTCCCTGTCGATGTGGT	ATACGTTCGTTTCCTCTGGGTGGGCTTACACTCGGACCTCGTCGACATGCATTAGTTTCCACTGTCCGGCTTGATTTTTGGACCCTCCTAAGTTTCGAGCTGGACTCAGTGGTTTCACAGTCCCTGTCGATGTGGT	ATACGTTCGTTTCCTCTGGGTGGGCTTACACTCGGACCTCGTCGACATGCATTAGTTTCCACTGTCCGGCTTGATTTTTGGACCCTCCTAAGTTTCGAGCTGGACTCAGTGGTTTCACAGTCCCTGTCGATGTGGTAGCCATCA
ENST00000436367	ENSG00000124788	ATXN1	set16	ENSG00000124788	ATXN1	-46	10090	10114	25	CTGGCCATGTCAGTCTGGTAGTGCC	0.867849	-51.1785	0.6	1	1	1	0	1	1	4	1	1	0	17	1	B5	ATACGTTCGTTTCCTCTGGGTGGGC	18	1	B6	GTTTCACAGTCCCTGTCGATGTGGT	ATACGTTCGTTTCCTCTGGGTGGGCTTACACTCGGACCTCGTCGACATGCATTCTGGCCATGTCAGTCTGGTAGTGCCCCTCCTAAGTTTCGAGCTGGACTCAGTGGTTTCACAGTCCCTGTCGATGTGGT	ATACGTTCGTTTCCTCTGGGTGGGCTTACACTCGGACCTCGTCGACATGCATTCTGGCCATGTCAGTCTGGTAGTGCCCCTCCTAAGTTTCGAGCTGGACTCAGTGGTTTCACAGTCCCTGTCGATGTGGTACGAGTCAGTTAA
ENST00000436367	ENSG00000124788	ATXN1	set16	ENSG00000124788	ATXN1	-46	2181	2207	27	TGTGTGTGGTCTGAATGACCGTGTGGG	0.932151	-53.2785	0.555556	1	1	1	0	1	1	4	1	1	0	17	1	B5	ATACGTTCGTTTCCTCTGGGTGGGC	18	1	B6	GTTTCACAGTCCCTGTCGATGTGGT	ATACGTTCGTTTCCTCTGGGTGGGCTTACACTCGGACCTCGTCGACATGCATTTGTGTGTGGTCTGAATGACCGTGTGGGCCTCCTAAGTTTCGAGCTGGACTCAGTGGTTTCACAGTCCCTGTCGATGTGGT	ATACGTTCGTTTCCTCTGGGTGGGCTTACACTCGGACCTCGTCGACATGCATTTGTGTGTGGTCTGAATGACCGTGTGGGCCTCCTAAGTTTCGAGCTGGACTCAGTGGTTTCACAGTCCCTGTCGATGTGGTATAAGGCAACT
ENST00000436367	ENSG00000124788	ATXN1	set16	ENSG00000124788	ATXN1	-46	450	481	32	GCAGCAGATCTTTTCACGAAGATTTTGCTTGA	0.982151	-54.7785	0.40625	1	1	1	1	1	1	5	1	1	0	17	1	B5	ATACGTTCGTTTCCTCTGGGTGGGC	18	1	B6	GTTTCACAGTCCCTGTCGATGTGGT	ATACGTTCGTTTCCTCTGGGTGGGCTTACACTCGGACCTCGTCGACATGCATTGCAGCAGATCTTTTCACGAAGATTTTGCTTGACCTCCTAAGTTTCGAGCTGGACTCAGTGGTTTCACAGTCCCTGTCGATGTGGT	ATACGTTCGTTTCCTCTGGGTGGGCTTACACTCGGACCTCGTCGACATGCATTGCAGCAGATCTTTTCACGAAGATTTTGCTTGACCTCCTAAGTTTCGAGCTGGACTCAGTGGTTTCACAGTCCCTGTCGATGTGGTACGGTA
ENST00000436367	ENSG00000124788	ATXN1	set16	ENSG00000124788	ATXN1	-46	2285	2310	26	GTGATTGCTTGCTGCTGGCCGCTCAG	0.932151	-53.6785	0.615385	1	1	1	0	1	1	4	1	1	0	17	1	B5	ATACGTTCGTTTCCTCTGGGTGGGC	18	1	B6	GTTTCACAGTCCCTGTCGATGTGGT	ATACGTTCGTTTCCTCTGGGTGGGCTTACACTCGGACCTCGTCGACATGCATTGTGATTGCTTGCTGCTGGCCGCTCAGCCTCCTAAGTTTCGAGCTGGACTCAGTGGTTTCACAGTCCCTGTCGATGTGGT	ATACGTTCGTTTCCTCTGGGTGGGCTTACACTCGGACCTCGTCGACATGCATTGTGATTGCTTGCTGCTGGCCGCTCAGCCTCCTAAGTTTCGAGCTGGACTCAGTGGTTTCACAGTCCCTGTCGATGTGGTACAAATATCTTA
ENST00000436367	ENSG00000124788	ATXN1	set16	ENSG00000124788	ATXN1	-46	1306	1332	27	AGCTGTGATGGGATGAAGCTGGCATAG	0.897849	-52.0785	0.518519	1	1	1	1	1	1	5	1	1	0	17	1	B5	ATACGTTCGTTTCCTCTGGGTGGGC	18	1	B6	GTTTCACAGTCCCTGTCGATGTGGT	ATACGTTCGTTTCCTCTGGGTGGGCTTACACTCGGACCTCGTCGACATGCATTAGCTGTGATGGGATGAAGCTGGCATAGCCTCCTAAGTTTCGAGCTGGACTCAGTGGTTTCACAGTCCCTGTCGATGTGGT	ATACGTTCGTTTCCTCTGGGTGGGCTTACACTCGGACCTCGTCGACATGCATTAGCTGTGATGGGATGAAGCTGGCATAGCCTCCTAAGTTTCGAGCTGGACTCAGTGGTTTCACAGTCCCTGTCGATGTGGTGTTATTTACCT
ENST00000436367	ENSG00000124788	ATXN1	set16	ENSG00000124788	ATXN1	-46	703	731	29	ACATTCACTGCGTACTGTTCACAGGTAGC	0.997849	-53.6785	0.482759	1	1	1	1	1	1	5	1	1	0	17	1	B5	ATACGTTCGTTTCCTCTGGGTGGGC	18	1	B6	GTTTCACAGTCCCTGTCGATGTGGT	ATACGTTCGTTTCCTCTGGGTGGGCTTACACTCGGACCTCGTCGACATGCATTACATTCACTGCGTACTGTTCACAGGTAGCCCTCCTAAGTTTCGAGCTGGACTCAGTGGTTTCACAGTCCCTGTCGATGTGGT	ATACGTTCGTTTCCTCTGGGTGGGCTTACACTCGGACCTCGTCGACATGCATTACATTCACTGCGTACTGTTCACAGGTAGCCCTCCTAAGTTTCGAGCTGGACTCAGTGGTTTCACAGTCCCTGTCGATGTGGTGATAAGGTT
ENST00000436367	ENSG00000124788	ATXN1	set16	ENSG00000124788	ATXN1	-46	10116	10145	30	AACATCATTCCTTCCCTAGTTCTCCTCTGT	0.997849	-53.9785	0.433333	1	1	1	0	1	1	4	1	1	0	17	1	B5	ATACGTTCGTTTCCTCTGGGTGGGC	18	1	B6	GTTTCACAGTCCCTGTCGATGTGGT	ATACGTTCGTTTCCTCTGGGTGGGCTTACACTCGGACCTCGTCGACATGCATTAACATCATTCCTTCCCTAGTTCTCCTCTGTCCTCCTAAGTTTCGAGCTGGACTCAGTGGTTTCACAGTCCCTGTCGATGTGGT	ATACGTTCGTTTCCTCTGGGTGGGCTTACACTCGGACCTCGTCGACATGCATTAACATCATTCCTTCCCTAGTTCTCCTCTGTCCTCCTAAGTTTCGAGCTGGACTCAGTGGTTTCACAGTCCCTGTCGATGTGGTTAAGTCAG
ENST00000436367	ENSG00000124788	ATXN1	set16	ENSG00000124788	ATXN1	-46	2661	2694	34	CTCTGGATGAAATCTTCTGTTTTTAAGTCTTCCA	0.977849	-54.6785	0.352941	1	1	1	0	1	1	4	1	1	0	17	1	B5	ATACGTTCGTTTCCTCTGGGTGGGC	18	1	B6	GTTTCACAGTCCCTGTCGATGTGGT	ATACGTTCGTTTCCTCTGGGTGGGCTTACACTCGGACCTCGTCGACATGCATTCTCTGGATGAAATCTTCTGTTTTTAAGTCTTCCACCTCCTAAGTTTCGAGCTGGACTCAGTGGTTTCACAGTCCCTGTCGATGTGGT	ATACGTTCGTTTCCTCTGGGTGGGCTTACACTCGGACCTCGTCGACATGCATTCTCTGGATGAAATCTTCTGTTTTTAAGTCTTCCACCTCCTAAGTTTCGAGCTGGACTCAGTGGTTTCACAGTCCCTGTCGATGTGGTACCG
ENST00000436367	ENSG00000124788	ATXN1	set16	ENSG00000124788	ATXN1	-46	8279	8304	26	ATCTCAGCTCCGGAGTAGAGGTGTGC	0.967849	-53.0785	0.576923	1	1	1	0	1	1	4	1	1	0	17	1	B5	ATACGTTCGTTTCCTCTGGGTGGGC	18	1	B6	GTTTCACAGTCCCTGTCGATGTGGT	ATACGTTCGTTTCCTCTGGGTGGGCTTACACTCGGACCTCGTCGACATGCATTATCTCAGCTCCGGAGTAGAGGTGTGCCCTCCTAAGTTTCGAGCTGGACTCAGTGGTTTCACAGTCCCTGTCGATGTGGT	ATACGTTCGTTTCCTCTGGGTGGGCTTACACTCGGACCTCGTCGACATGCATTATCTCAGCTCCGGAGTAGAGGTGTGCCCTCCTAAGTTTCGAGCTGGACTCAGTGGTTTCACAGTCCCTGTCGATGTGGTTAGTCGGGCCCA
ENST00000436367	ENSG00000124788	ATXN1	set16	ENSG00000124788	ATXN1	-46	1406	1430	25	GAGTGGAATAGGCCTCCAGCTGGGA	0.977849	-52.4785	0.6	1	1	1	1	1	1	5	1	1	0	17	1	B5	ATACGTTCGTTTCCTCTGGGTGGGC	18	1	B6	GTTTCACAGTCCCTGTCGATGTGGT	ATACGTTCGTTTCCTCTGGGTGGGCTTACACTCGGACCTCGTCGACATGCATTGAGTGGAATAGGCCTCCAGCTGGGACCTCCTAAGTTTCGAGCTGGACTCAGTGGTTTCACAGTCCCTGTCGATGTGGT	ATACGTTCGTTTCCTCTGGGTGGGCTTACACTCGGACCTCGTCGACATGCATTGAGTGGAATAGGCCTCCAGCTGGGACCTCCTAAGTTTCGAGCTGGACTCAGTGGTTTCACAGTCCCTGTCGATGTGGTGAATGCCCTACTA
ENST00000436367	ENSG00000124788	ATXN1	set16	ENSG00000124788	ATXN1	-46	673	701	29	TCAGCCTATACTTCACCATGGAGACTTCC	0.932151	-54.4785	0.482759	1	1	1	1	1	1	5	1	1	0	17	1	B5	ATACGTTCGTTTCCTCTGGGTGGGC	18	1	B6	GTTTCACAGTCCCTGTCGATGTGGT	ATACGTTCGTTTCCTCTGGGTGGGCTTACACTCGGACCTCGTCGACATGCATTTCAGCCTATACTTCACCATGGAGACTTCCCCTCCTAAGTTTCGAGCTGGACTCAGTGGTTTCACAGTCCCTGTCGATGTGGT	ATACGTTCGTTTCCTCTGGGTGGGCTTACACTCGGACCTCGTCGACATGCATTTCAGCCTATACTTCACCATGGAGACTTCCCCTCCTAAGTTTCGAGCTGGACTCAGTGGTTTCACAGTCCCTGTCGATGTGGTAACGAATGG
ENST00000436367	ENSG00000124788	ATXN1	set16	ENSG00000124788	ATXN1	-46	1996	2022	27	CCCGAAGGATCACGACTGCTGTAGTCT	0.957849	-52.9785	0.555556	1	1	1	1	1	1	5	1	1	0	17	1	B5	ATACGTTCGTTTCCTCTGGGTGGGC	18	1	B6	GTTTCACAGTCCCTGTCGATGTGGT	ATACGTTCGTTTCCTCTGGGTGGGCTTACACTCGGACCTCGTCGACATGCATTCCCGAAGGATCACGACTGCTGTAGTCTCCTCCTAAGTTTCGAGCTGGACTCAGTGGTTTCACAGTCCCTGTCGATGTGGT	ATACGTTCGTTTCCTCTGGGTGGGCTTACACTCGGACCTCGTCGACATGCATTCCCGAAGGATCACGACTGCTGTAGTCTCCTCCTAAGTTTCGAGCTGGACTCAGTGGTTTCACAGTCCCTGTCGATGTGGTCTATCACATGA
ENST00000481247	ENSG00000183826	BTBD9	set16	ENSG00000183826	BTBD9	-46	7837	7860	24	ACCTTACTGGCAGCACCCTGCCCT	0.967849	-51.7785	0.625	1	1	1	0	1	1	4	1	1	0	19	1	B7	TGGCAGGGTTCTTCACGGTTCCTTT	20	1	B8	AGTCTAGACTGTCAGCTGCCCAACC	TGGCAGGGTTCTTCACGGTTCCTTTTTACACTCGGACCTCGTCGACATGCATTACCTTACTGGCAGCACCCTGCCCTCCTCCTAAGTTTCGAGCTGGACTCAGTGAGTCTAGACTGTCAGCTGCCCAACC	TGGCAGGGTTCTTCACGGTTCCTTTTTACACTCGGACCTCGTCGACATGCATTACCTTACTGGCAGCACCCTGCCCTCCTCCTAAGTTTCGAGCTGGACTCAGTGAGTCTAGACTGTCAGCTGCCCAACCGGTGGGGGGAGGCT
ENST00000481247	ENSG00000183826	BTBD9	set16	ENSG00000183826	BTBD9	-46	7993	8020	28	GATTTCTCACTGTTCTTCTGAGGGGGTG	0.867849	-52.0785	0.5	1	1	1	0	1	1	4	1	1	0	19	1	B7	TGGCAGGGTTCTTCACGGTTCCTTT	20	1	B8	AGTCTAGACTGTCAGCTGCCCAACC	TGGCAGGGTTCTTCACGGTTCCTTTTTACACTCGGACCTCGTCGACATGCATTGATTTCTCACTGTTCTTCTGAGGGGGTGCCTCCTAAGTTTCGAGCTGGACTCAGTGAGTCTAGACTGTCAGCTGCCCAACC	TGGCAGGGTTCTTCACGGTTCCTTTTTACACTCGGACCTCGTCGACATGCATTGATTTCTCACTGTTCTTCTGAGGGGGTGCCTCCTAAGTTTCGAGCTGGACTCAGTGAGTCTAGACTGTCAGCTGCCCAACCCAACAACCGG
ENST00000481247	ENSG00000183826	BTBD9	set16	ENSG00000183826	BTBD9	-46	2383	2407	25	GCCCATTCCTAAAGGGTGCCTCCAG	0.867849	-50.8785	0.6	1	1	1	0	1	1	4	1	1	0	19	1	B7	TGGCAGGGTTCTTCACGGTTCCTTT	20	1	B8	AGTCTAGACTGTCAGCTGCCCAACC	TGGCAGGGTTCTTCACGGTTCCTTTTTACACTCGGACCTCGTCGACATGCATTGCCCATTCCTAAAGGGTGCCTCCAGCCTCCTAAGTTTCGAGCTGGACTCAGTGAGTCTAGACTGTCAGCTGCCCAACC	TGGCAGGGTTCTTCACGGTTCCTTTTTACACTCGGACCTCGTCGACATGCATTGCCCATTCCTAAAGGGTGCCTCCAGCCTCCTAAGTTTCGAGCTGGACTCAGTGAGTCTAGACTGTCAGCTGCCCAACCGGCGGATGCAGTC
ENST00000481247	ENSG00000183826	BTBD9	set16	ENSG00000183826	BTBD9	-46	7105	7130	26	TTGTGAGTCTTCAGGCCATGAGGCCT	0.927849	-52.1785	0.538462	1	1	1	0	1	1	4	1	1	0	19	1	B7	TGGCAGGGTTCTTCACGGTTCCTTT	20	1	B8	AGTCTAGACTGTCAGCTGCCCAACC	TGGCAGGGTTCTTCACGGTTCCTTTTTACACTCGGACCTCGTCGACATGCATTTTGTGAGTCTTCAGGCCATGAGGCCTCCTCCTAAGTTTCGAGCTGGACTCAGTGAGTCTAGACTGTCAGCTGCCCAACC	TGGCAGGGTTCTTCACGGTTCCTTTTTACACTCGGACCTCGTCGACATGCATTTTGTGAGTCTTCAGGCCATGAGGCCTCCTCCTAAGTTTCGAGCTGGACTCAGTGAGTCTAGACTGTCAGCTGCCCAACCGTGCTACTACTC
ENST00000481247	ENSG00000183826	BTBD9	set16	ENSG00000183826	BTBD9	-46	4973	5001	29	TTGTGTCCTTTCCATTGGTTACTGAGGAC	0.877849	-52.0785	0.448276	1	1	1	0	1	1	4	1	1	0	19	1	B7	TGGCAGGGTTCTTCACGGTTCCTTT	20	1	B8	AGTCTAGACTGTCAGCTGCCCAACC	TGGCAGGGTTCTTCACGGTTCCTTTTTACACTCGGACCTCGTCGACATGCATTTTGTGTCCTTTCCATTGGTTACTGAGGACCCTCCTAAGTTTCGAGCTGGACTCAGTGAGTCTAGACTGTCAGCTGCCCAACC	TGGCAGGGTTCTTCACGGTTCCTTTTTACACTCGGACCTCGTCGACATGCATTTTGTGTCCTTTCCATTGGTTACTGAGGACCCTCCTAAGTTTCGAGCTGGACTCAGTGAGTCTAGACTGTCAGCTGCCCAACCACTCCCGTG
ENST00000481247	ENSG00000183826	BTBD9	set16	ENSG00000183826	BTBD9	-46	7502	7527	26	CATGTGGTGGGGAGCAATTTGGCAGC	0.967849	-51.8785	0.576923	1	1	1	0	1	1	4	1	1	0	19	1	B7	TGGCAGGGTTCTTCACGGTTCCTTT	20	1	B8	AGTCTAGACTGTCAGCTGCCCAACC	TGGCAGGGTTCTTCACGGTTCCTTTTTACACTCGGACCTCGTCGACATGCATTCATGTGGTGGGGAGCAATTTGGCAGCCCTCCTAAGTTTCGAGCTGGACTCAGTGAGTCTAGACTGTCAGCTGCCCAACC	TGGCAGGGTTCTTCACGGTTCCTTTTTACACTCGGACCTCGTCGACATGCATTCATGTGGTGGGGAGCAATTTGGCAGCCCTCCTAAGTTTCGAGCTGGACTCAGTGAGTCTAGACTGTCAGCTGCCCAACCTAAGCCCGGTGC
ENST00000481247	ENSG00000183826	BTBD9	set16	ENSG00000183826	BTBD9	-46	368	396	29	AGAGGAATTTCTGCTTCAGGCTGAGACTC	0.982151	-54.4785	0.482759	1	1	1	1	1	1	5	1	1	0	19	1	B7	TGGCAGGGTTCTTCACGGTTCCTTT	20	1	B8	AGTCTAGACTGTCAGCTGCCCAACC	TGGCAGGGTTCTTCACGGTTCCTTTTTACACTCGGACCTCGTCGACATGCATTAGAGGAATTTCTGCTTCAGGCTGAGACTCCCTCCTAAGTTTCGAGCTGGACTCAGTGAGTCTAGACTGTCAGCTGCCCAACC	TGGCAGGGTTCTTCACGGTTCCTTTTTACACTCGGACCTCGTCGACATGCATTAGAGGAATTTCTGCTTCAGGCTGAGACTCCCTCCTAAGTTTCGAGCTGGACTCAGTGAGTCTAGACTGTCAGCTGCCCAACCCTTTAATTT
ENST00000481247	ENSG00000183826	BTBD9	set16	ENSG00000183826	BTBD9	-46	7017	7042	26	GTTCAGCCTGGCTTCTGACTGGAAGC	0.937849	-52.5785	0.576923	1	1	1	0	1	1	4	1	1	0	19	1	B7	TGGCAGGGTTCTTCACGGTTCCTTT	20	1	B8	AGTCTAGACTGTCAGCTGCCCAACC	TGGCAGGGTTCTTCACGGTTCCTTTTTACACTCGGACCTCGTCGACATGCATTGTTCAGCCTGGCTTCTGACTGGAAGCCCTCCTAAGTTTCGAGCTGGACTCAGTGAGTCTAGACTGTCAGCTGCCCAACC	TGGCAGGGTTCTTCACGGTTCCTTTTTACACTCGGACCTCGTCGACATGCATTGTTCAGCCTGGCTTCTGACTGGAAGCCCTCCTAAGTTTCGAGCTGGACTCAGTGAGTCTAGACTGTCAGCTGCCCAACCGCGGGTTGACGC
ENST00000481247	ENSG00000183826	BTBD9	set16	ENSG00000183826	BTBD9	-46	7655	7678	24	TAGCAGCAGCCATCAGGGGCTGTG	0.877849	-51.0785	0.625	1	1	1	0	1	1	4	1	1	0	19	1	B7	TGGCAGGGTTCTTCACGGTTCCTTT	20	1	B8	AGTCTAGACTGTCAGCTGCCCAACC	TGGCAGGGTTCTTCACGGTTCCTTTTTACACTCGGACCTCGTCGACATGCATTTAGCAGCAGCCATCAGGGGCTGTGCCTCCTAAGTTTCGAGCTGGACTCAGTGAGTCTAGACTGTCAGCTGCCCAACC	TGGCAGGGTTCTTCACGGTTCCTTTTTACACTCGGACCTCGTCGACATGCATTTAGCAGCAGCCATCAGGGGCTGTGCCTCCTAAGTTTCGAGCTGGACTCAGTGAGTCTAGACTGTCAGCTGCCCAACCGTGGTCCCTCTAAT
ENST00000481247	ENSG00000183826	BTBD9	set16	ENSG00000183826	BTBD9	-46	8148	8174	27	CTTCGCAAAAGCAGCTCTTGGGCCGAG	0.972151	-53.4785	0.592593	1	1	0	1	1	1	4	1	1	0	19	1	B7	TGGCAGGGTTCTTCACGGTTCCTTT	20	1	B8	AGTCTAGACTGTCAGCTGCCCAACC	TGGCAGGGTTCTTCACGGTTCCTTTTTACACTCGGACCTCGTCGACATGCATTCTTCGCAAAAGCAGCTCTTGGGCCGAGCCTCCTAAGTTTCGAGCTGGACTCAGTGAGTCTAGACTGTCAGCTGCCCAACC	TGGCAGGGTTCTTCACGGTTCCTTTTTACACTCGGACCTCGTCGACATGCATTCTTCGCAAAAGCAGCTCTTGGGCCGAGCCTCCTAAGTTTCGAGCTGGACTCAGTGAGTCTAGACTGTCAGCTGCCCAACCAGACGTAAACA
ENST00000481247	ENSG00000183826	BTBD9	set16	ENSG00000183826	BTBD9	-46	8074	8098	25	TCTCACGCTTCTCCAGGCACTGGGG	0.922151	-53.4785	0.64	1	1	1	0	1	1	4	1	1	0	19	1	B7	TGGCAGGGTTCTTCACGGTTCCTTT	20	1	B8	AGTCTAGACTGTCAGCTGCCCAACC	TGGCAGGGTTCTTCACGGTTCCTTTTTACACTCGGACCTCGTCGACATGCATTTCTCACGCTTCTCCAGGCACTGGGGCCTCCTAAGTTTCGAGCTGGACTCAGTGAGTCTAGACTGTCAGCTGCCCAACC	TGGCAGGGTTCTTCACGGTTCCTTTTTACACTCGGACCTCGTCGACATGCATTTCTCACGCTTCTCCAGGCACTGGGGCCTCCTAAGTTTCGAGCTGGACTCAGTGAGTCTAGACTGTCAGCTGCCCAACCCGAAAAGTACATC
ENST00000481247	ENSG00000183826	BTBD9	set16	ENSG00000183826	BTBD9	-46	4789	4813	25	CACGGACTGAGCCTCCACTCTCTGC	0.977849	-52.8785	0.64	1	1	1	0	1	1	4	1	1	0	19	1	B7	TGGCAGGGTTCTTCACGGTTCCTTT	20	1	B8	AGTCTAGACTGTCAGCTGCCCAACC	TGGCAGGGTTCTTCACGGTTCCTTTTTACACTCGGACCTCGTCGACATGCATTCACGGACTGAGCCTCCACTCTCTGCCCTCCTAAGTTTCGAGCTGGACTCAGTGAGTCTAGACTGTCAGCTGCCCAACC	TGGCAGGGTTCTTCACGGTTCCTTTTTACACTCGGACCTCGTCGACATGCATTCACGGACTGAGCCTCCACTCTCTGCCCTCCTAAGTTTCGAGCTGGACTCAGTGAGTCTAGACTGTCAGCTGCCCAACCAATAGGCACGCAC
ENST00000481247	ENSG00000183826	BTBD9	set16	ENSG00000183826	BTBD9	-46	7244	7269	26	CTAGTGGGGACAGGTGTGTAGCTCCT	0.987849	-52.7785	0.576923	1	1	1	0	1	1	4	1	1	0	19	1	B7	TGGCAGGGTTCTTCACGGTTCCTTT	20	1	B8	AGTCTAGACTGTCAGCTGCCCAACC	TGGCAGGGTTCTTCACGGTTCCTTTTTACACTCGGACCTCGTCGACATGCATTCTAGTGGGGACAGGTGTGTAGCTCCTCCTCCTAAGTTTCGAGCTGGACTCAGTGAGTCTAGACTGTCAGCTGCCCAACC	TGGCAGGGTTCTTCACGGTTCCTTTTTACACTCGGACCTCGTCGACATGCATTCTAGTGGGGACAGGTGTGTAGCTCCTCCTCCTAAGTTTCGAGCTGGACTCAGTGAGTCTAGACTGTCAGCTGCCCAACCCTTGGCAGTGAT
ENST00000481247	ENSG00000183826	BTBD9	set16	ENSG00000183826	BTBD9	-46	6368	6393	26	AGCGAGAGAGATGGGGGCATTCCAGT	0.932151	-53.6785	0.576923	1	1	1	1	1	1	5	1	1	0	19	1	B7	TGGCAGGGTTCTTCACGGTTCCTTT	20	1	B8	AGTCTAGACTGTCAGCTGCCCAACC	TGGCAGGGTTCTTCACGGTTCCTTTTTACACTCGGACCTCGTCGACATGCATTAGCGAGAGAGATGGGGGCATTCCAGTCCTCCTAAGTTTCGAGCTGGACTCAGTGAGTCTAGACTGTCAGCTGCCCAACC	TGGCAGGGTTCTTCACGGTTCCTTTTTACACTCGGACCTCGTCGACATGCATTAGCGAGAGAGATGGGGGCATTCCAGTCCTCCTAAGTTTCGAGCTGGACTCAGTGAGTCTAGACTGTCAGCTGCCCAACCTTTAAGTCTTTC
ENST00000481247	ENSG00000183826	BTBD9	set16	ENSG00000183826	BTBD9	-46	2323	2353	31	GCCTGAGTGTTTGCGTGCCATTTTTGTATTC	0.912151	-54.5785	0.451613	1	1	1	0	1	1	4	1	1	0	19	1	B7	TGGCAGGGTTCTTCACGGTTCCTTT	20	1	B8	AGTCTAGACTGTCAGCTGCCCAACC	TGGCAGGGTTCTTCACGGTTCCTTTTTACACTCGGACCTCGTCGACATGCATTGCCTGAGTGTTTGCGTGCCATTTTTGTATTCCCTCCTAAGTTTCGAGCTGGACTCAGTGAGTCTAGACTGTCAGCTGCCCAACC	TGGCAGGGTTCTTCACGGTTCCTTTTTACACTCGGACCTCGTCGACATGCATTGCCTGAGTGTTTGCGTGCCATTTTTGTATTCCCTCCTAAGTTTCGAGCTGGACTCAGTGAGTCTAGACTGTCAGCTGCCCAACCCGGTCAT
ENST00000481247	ENSG00000183826	BTBD9	set16	ENSG00000183826	BTBD9	-46	2697	2725	29	AACTCCAGTGTCCACAGGTTGATTTGCTT	0.937849	-52.6785	0.448276	1	1	1	0	1	1	4	1	1	0	19	1	B7	TGGCAGGGTTCTTCACGGTTCCTTT	20	1	B8	AGTCTAGACTGTCAGCTGCCCAACC	TGGCAGGGTTCTTCACGGTTCCTTTTTACACTCGGACCTCGTCGACATGCATTAACTCCAGTGTCCACAGGTTGATTTGCTTCCTCCTAAGTTTCGAGCTGGACTCAGTGAGTCTAGACTGTCAGCTGCCCAACC	TGGCAGGGTTCTTCACGGTTCCTTTTTACACTCGGACCTCGTCGACATGCATTAACTCCAGTGTCCACAGGTTGATTTGCTTCCTCCTAAGTTTCGAGCTGGACTCAGTGAGTCTAGACTGTCAGCTGCCCAACCAGTTTGACC
ENST00000481247	ENSG00000183826	BTBD9	set16	ENSG00000183826	BTBD9	-46	8343	8371	29	ATAGCAGCACAGCCTTTTGGGCATCTTTG	0.972151	-53.5785	0.482759	1	1	1	0	1	1	4	1	1	0	19	1	B7	TGGCAGGGTTCTTCACGGTTCCTTT	20	1	B8	AGTCTAGACTGTCAGCTGCCCAACC	TGGCAGGGTTCTTCACGGTTCCTTTTTACACTCGGACCTCGTCGACATGCATTATAGCAGCACAGCCTTTTGGGCATCTTTGCCTCCTAAGTTTCGAGCTGGACTCAGTGAGTCTAGACTGTCAGCTGCCCAACC	TGGCAGGGTTCTTCACGGTTCCTTTTTACACTCGGACCTCGTCGACATGCATTATAGCAGCACAGCCTTTTGGGCATCTTTGCCTCCTAAGTTTCGAGCTGGACTCAGTGAGTCTAGACTGTCAGCTGCCCAACCTTCGGAGAC
ENST00000481247	ENSG00000183826	BTBD9	set16	ENSG00000183826	BTBD9	-46	989	1019	31	TTACAACTTGGGCTCCATACTTCATAGTTGC	0.982151	-54.0785	0.419355	1	1	1	1	1	1	5	1	1	0	19	1	B7	TGGCAGGGTTCTTCACGGTTCCTTT	20	1	B8	AGTCTAGACTGTCAGCTGCCCAACC	TGGCAGGGTTCTTCACGGTTCCTTTTTACACTCGGACCTCGTCGACATGCATTTTACAACTTGGGCTCCATACTTCATAGTTGCCCTCCTAAGTTTCGAGCTGGACTCAGTGAGTCTAGACTGTCAGCTGCCCAACC	TGGCAGGGTTCTTCACGGTTCCTTTTTACACTCGGACCTCGTCGACATGCATTTTACAACTTGGGCTCCATACTTCATAGTTGCCCTCCTAAGTTTCGAGCTGGACTCAGTGAGTCTAGACTGTCAGCTGCCCAACCCCAATAG
ENST00000481247	ENSG00000183826	BTBD9	set16	ENSG00000183826	BTBD9	-46	899	926	28	GCACTTTAATGGCATCCAGGATGGCATC	0.957849	-52.5785	0.5	1	1	1	1	1	1	5	1	1	0	19	1	B7	TGGCAGGGTTCTTCACGGTTCCTTT	20	1	B8	AGTCTAGACTGTCAGCTGCCCAACC	TGGCAGGGTTCTTCACGGTTCCTTTTTACACTCGGACCTCGTCGACATGCATTGCACTTTAATGGCATCCAGGATGGCATCCCTCCTAAGTTTCGAGCTGGACTCAGTGAGTCTAGACTGTCAGCTGCCCAACC	TGGCAGGGTTCTTCACGGTTCCTTTTTACACTCGGACCTCGTCGACATGCATTGCACTTTAATGGCATCCAGGATGGCATCCCTCCTAAGTTTCGAGCTGGACTCAGTGAGTCTAGACTGTCAGCTGCCCAACCAGCGGTTGGG
ENST00000481247	ENSG00000183826	BTBD9	set16	ENSG00000183826	BTBD9	-46	2294	2321	28	AACACAGGCCTGTCTATGACTTCCTCCT	0.952151	-53.9785	0.5	1	1	1	0	1	1	4	1	1	0	19	1	B7	TGGCAGGGTTCTTCACGGTTCCTTT	20	1	B8	AGTCTAGACTGTCAGCTGCCCAACC	TGGCAGGGTTCTTCACGGTTCCTTTTTACACTCGGACCTCGTCGACATGCATTAACACAGGCCTGTCTATGACTTCCTCCTCCTCCTAAGTTTCGAGCTGGACTCAGTGAGTCTAGACTGTCAGCTGCCCAACC	TGGCAGGGTTCTTCACGGTTCCTTTTTACACTCGGACCTCGTCGACATGCATTAACACAGGCCTGTCTATGACTTCCTCCTCCTCCTAAGTTTCGAGCTGGACTCAGTGAGTCTAGACTGTCAGCTGCCCAACCTCCGCACGTT
ENST00000481247	ENSG00000183826	BTBD9	set16	ENSG00000183826	BTBD9	-46	2669	2695	27	TGTGCATTTGTGGCACTTCCTCTGTGG	0.907849	-51.7785	0.518519	1	1	1	0	1	1	4	1	1	0	19	1	B7	TGGCAGGGTTCTTCACGGTTCCTTT	20	1	B8	AGTCTAGACTGTCAGCTGCCCAACC	TGGCAGGGTTCTTCACGGTTCCTTTTTACACTCGGACCTCGTCGACATGCATTTGTGCATTTGTGGCACTTCCTCTGTGGCCTCCTAAGTTTCGAGCTGGACTCAGTGAGTCTAGACTGTCAGCTGCCCAACC	TGGCAGGGTTCTTCACGGTTCCTTTTTACACTCGGACCTCGTCGACATGCATTTGTGCATTTGTGGCACTTCCTCTGTGGCCTCCTAAGTTTCGAGCTGGACTCAGTGAGTCTAGACTGTCAGCTGCCCAACCATCCAGCACGT
ENST00000481247	ENSG00000183826	BTBD9	set16	ENSG00000183826	BTBD9	-46	5738	5761	24	TGGGCTGGAGCCATCTGCACAGCA	0.992151	-52.3785	0.625	1	1	1	0	1	1	4	1	1	0	19	1	B7	TGGCAGGGTTCTTCACGGTTCCTTT	20	1	B8	AGTCTAGACTGTCAGCTGCCCAACC	TGGCAGGGTTCTTCACGGTTCCTTTTTACACTCGGACCTCGTCGACATGCATTTGGGCTGGAGCCATCTGCACAGCACCTCCTAAGTTTCGAGCTGGACTCAGTGAGTCTAGACTGTCAGCTGCCCAACC	TGGCAGGGTTCTTCACGGTTCCTTTTTACACTCGGACCTCGTCGACATGCATTTGGGCTGGAGCCATCTGCACAGCACCTCCTAAGTTTCGAGCTGGACTCAGTGAGTCTAGACTGTCAGCTGCCCAACCCTTTGCGTTTACGC
ENST00000481247	ENSG00000183826	BTBD9	set16	ENSG00000183826	BTBD9	-46	5286	5309	24	TCCTGTGAGACTGCCCTGCTGGGT	0.977849	-52.1785	0.625	1	1	1	0	1	1	4	1	1	0	19	1	B7	TGGCAGGGTTCTTCACGGTTCCTTT	20	1	B8	AGTCTAGACTGTCAGCTGCCCAACC	TGGCAGGGTTCTTCACGGTTCCTTTTTACACTCGGACCTCGTCGACATGCATTTCCTGTGAGACTGCCCTGCTGGGTCCTCCTAAGTTTCGAGCTGGACTCAGTGAGTCTAGACTGTCAGCTGCCCAACC	TGGCAGGGTTCTTCACGGTTCCTTTTTACACTCGGACCTCGTCGACATGCATTTCCTGTGAGACTGCCCTGCTGGGTCCTCCTAAGTTTCGAGCTGGACTCAGTGAGTCTAGACTGTCAGCTGCCCAACCCGGGCCGTGGTAAC
ENST00000481247	ENSG00000183826	BTBD9	set16	ENSG00000183826	BTBD9	-46	5260	5284	25	CTGGCTGCATGGACACAGCTGCTGC	0.942151	-53.2785	0.64	1	1	1	0	1	1	4	1	1	0	19	1	B7	TGGCAGGGTTCTTCACGGTTCCTTT	20	1	B8	AGTCTAGACTGTCAGCTGCCCAACC	TGGCAGGGTTCTTCACGGTTCCTTTTTACACTCGGACCTCGTCGACATGCATTCTGGCTGCATGGACACAGCTGCTGCCCTCCTAAGTTTCGAGCTGGACTCAGTGAGTCTAGACTGTCAGCTGCCCAACC	TGGCAGGGTTCTTCACGGTTCCTTTTTACACTCGGACCTCGTCGACATGCATTCTGGCTGCATGGACACAGCTGCTGCCCTCCTAAGTTTCGAGCTGGACTCAGTGAGTCTAGACTGTCAGCTGCCCAACCGTATACTGAGAAT
ENST00000481247	ENSG00000183826	BTBD9	set16	ENSG00000183826	BTBD9	-46	5207	5232	26	TCTCAGTCCACCCCAAATGACCCTCC	0.932151	-53.2785	0.576923	1	1	1	1	0	1	4	1	1	0	19	1	B7	TGGCAGGGTTCTTCACGGTTCCTTT	20	1	B8	AGTCTAGACTGTCAGCTGCCCAACC	TGGCAGGGTTCTTCACGGTTCCTTTTTACACTCGGACCTCGTCGACATGCATTTCTCAGTCCACCCCAAATGACCCTCCCCTCCTAAGTTTCGAGCTGGACTCAGTGAGTCTAGACTGTCAGCTGCCCAACC	TGGCAGGGTTCTTCACGGTTCCTTTTTACACTCGGACCTCGTCGACATGCATTTCTCAGTCCACCCCAAATGACCCTCCCCTCCTAAGTTTCGAGCTGGACTCAGTGAGTCTAGACTGTCAGCTGCCCAACCTGGTGAGGCTCG
ENST00000481247	ENSG00000183826	BTBD9	set16	ENSG00000183826	BTBD9	-46	5027	5052	26	GTGCTGGCCACCTCCCATTTCTTTGC	0.977849	-52.2785	0.576923	1	1	1	0	1	1	4	1	1	0	19	1	B7	TGGCAGGGTTCTTCACGGTTCCTTT	20	1	B8	AGTCTAGACTGTCAGCTGCCCAACC	TGGCAGGGTTCTTCACGGTTCCTTTTTACACTCGGACCTCGTCGACATGCATTGTGCTGGCCACCTCCCATTTCTTTGCCCTCCTAAGTTTCGAGCTGGACTCAGTGAGTCTAGACTGTCAGCTGCCCAACC	TGGCAGGGTTCTTCACGGTTCCTTTTTACACTCGGACCTCGTCGACATGCATTGTGCTGGCCACCTCCCATTTCTTTGCCCTCCTAAGTTTCGAGCTGGACTCAGTGAGTCTAGACTGTCAGCTGCCCAACCTCACTATCTTGT
ENST00000481247	ENSG00000183826	BTBD9	set16	ENSG00000183826	BTBD9	-46	2236	2265	30	GGTAGGGTGTTAATGGTGGACTTGATGAAG	0.962151	-53.7785	0.466667	1	1	1	1	1	1	5	1	1	0	19	1	B7	TGGCAGGGTTCTTCACGGTTCCTTT	20	1	B8	AGTCTAGACTGTCAGCTGCCCAACC	TGGCAGGGTTCTTCACGGTTCCTTTTTACACTCGGACCTCGTCGACATGCATTGGTAGGGTGTTAATGGTGGACTTGATGAAGCCTCCTAAGTTTCGAGCTGGACTCAGTGAGTCTAGACTGTCAGCTGCCCAACC	TGGCAGGGTTCTTCACGGTTCCTTTTTACACTCGGACCTCGTCGACATGCATTGGTAGGGTGTTAATGGTGGACTTGATGAAGCCTCCTAAGTTTCGAGCTGGACTCAGTGAGTCTAGACTGTCAGCTGCCCAACCCTAACCAA
ENST00000481247	ENSG00000183826	BTBD9	set16	ENSG00000183826	BTBD9	-46	4681	4709	29	TTCAAGTGTTTAGGTCGCTTTGGTCCTGG	0.967849	-52.9785	0.482759	1	1	1	0	1	1	4	1	1	0	19	1	B7	TGGCAGGGTTCTTCACGGTTCCTTT	20	1	B8	AGTCTAGACTGTCAGCTGCCCAACC	TGGCAGGGTTCTTCACGGTTCCTTTTTACACTCGGACCTCGTCGACATGCATTTTCAAGTGTTTAGGTCGCTTTGGTCCTGGCCTCCTAAGTTTCGAGCTGGACTCAGTGAGTCTAGACTGTCAGCTGCCCAACC	TGGCAGGGTTCTTCACGGTTCCTTTTTACACTCGGACCTCGTCGACATGCATTTTCAAGTGTTTAGGTCGCTTTGGTCCTGGCCTCCTAAGTTTCGAGCTGGACTCAGTGAGTCTAGACTGTCAGCTGCCCAACCGGGCCTCAT
ENST00000481247	ENSG00000183826	BTBD9	set16	ENSG00000183826	BTBD9	-46	4655	4679	25	GGCCCAGGGGAGAAGTGCTCTGTAG	0.962151	-53.0785	0.64	1	1	1	0	1	1	4	1	1	0	19	1	B7	TGGCAGGGTTCTTCACGGTTCCTTT	20	1	B8	AGTCTAGACTGTCAGCTGCCCAACC	TGGCAGGGTTCTTCACGGTTCCTTTTTACACTCGGACCTCGTCGACATGCATTGGCCCAGGGGAGAAGTGCTCTGTAGCCTCCTAAGTTTCGAGCTGGACTCAGTGAGTCTAGACTGTCAGCTGCCCAACC	TGGCAGGGTTCTTCACGGTTCCTTTTTACACTCGGACCTCGTCGACATGCATTGGCCCAGGGGAGAAGTGCTCTGTAGCCTCCTAAGTTTCGAGCTGGACTCAGTGAGTCTAGACTGTCAGCTGCCCAACCAAGGACAGACGGA
ENST00000481247	ENSG00000183826	BTBD9	set16	ENSG00000183826	BTBD9	-46	2115	2142	28	GTTCGGTGTCTGCTTTTGCAGCTAGGTC	0.972151	-53.8785	0.535714	1	1	1	0	1	1	4	1	1	0	19	1	B7	TGGCAGGGTTCTTCACGGTTCCTTT	20	1	B8	AGTCTAGACTGTCAGCTGCCCAACC	TGGCAGGGTTCTTCACGGTTCCTTTTTACACTCGGACCTCGTCGACATGCATTGTTCGGTGTCTGCTTTTGCAGCTAGGTCCCTCCTAAGTTTCGAGCTGGACTCAGTGAGTCTAGACTGTCAGCTGCCCAACC	TGGCAGGGTTCTTCACGGTTCCTTTTTACACTCGGACCTCGTCGACATGCATTGTTCGGTGTCTGCTTTTGCAGCTAGGTCCCTCCTAAGTTTCGAGCTGGACTCAGTGAGTCTAGACTGTCAGCTGCCCAACCAGGCGTGGAA
ENST00000481247	ENSG00000183826	BTBD9	set16	ENSG00000183826	BTBD9	-46	6339	6366	28	GTCCTGCATGCCATTTAAACCTTGCCCT	0.992151	-52.8785	0.5	1	1	1	0	1	1	4	1	1	0	19	1	B7	TGGCAGGGTTCTTCACGGTTCCTTT	20	1	B8	AGTCTAGACTGTCAGCTGCCCAACC	TGGCAGGGTTCTTCACGGTTCCTTTTTACACTCGGACCTCGTCGACATGCATTGTCCTGCATGCCATTTAAACCTTGCCCTCCTCCTAAGTTTCGAGCTGGACTCAGTGAGTCTAGACTGTCAGCTGCCCAACC	TGGCAGGGTTCTTCACGGTTCCTTTTTACACTCGGACCTCGTCGACATGCATTGTCCTGCATGCCATTTAAACCTTGCCCTCCTCCTAAGTTTCGAGCTGGACTCAGTGAGTCTAGACTGTCAGCTGCCCAACCCGAGTCATTA
ENST00000481247	ENSG00000183826	BTBD9	set16	ENSG00000183826	BTBD9	-46	6309	6337	29	CCCTCTCTTCTGGAAACTCTGAGCAAACA	0.997849	-53.8785	0.482759	1	1	1	1	1	0	4	1	1	0	19	1	B7	TGGCAGGGTTCTTCACGGTTCCTTT	20	1	B8	AGTCTAGACTGTCAGCTGCCCAACC	TGGCAGGGTTCTTCACGGTTCCTTTTTACACTCGGACCTCGTCGACATGCATTCCCTCTCTTCTGGAAACTCTGAGCAAACACCTCCTAAGTTTCGAGCTGGACTCAGTGAGTCTAGACTGTCAGCTGCCCAACC	TGGCAGGGTTCTTCACGGTTCCTTTTTACACTCGGACCTCGTCGACATGCATTCCCTCTCTTCTGGAAACTCTGAGCAAACACCTCCTAAGTTTCGAGCTGGACTCAGTGAGTCTAGACTGTCAGCTGCCCAACCTCCTAATAT
ENST00000481247	ENSG00000183826	BTBD9	set16	ENSG00000183826	BTBD9	-46	3287	3313	27	TCCTTTGATCAGGGTTGCAGGTTGGCG	0.952151	-53.1785	0.555556	1	1	1	0	1	1	4	1	1	0	19	1	B7	TGGCAGGGTTCTTCACGGTTCCTTT	20	1	B8	AGTCTAGACTGTCAGCTGCCCAACC	TGGCAGGGTTCTTCACGGTTCCTTTTTACACTCGGACCTCGTCGACATGCATTTCCTTTGATCAGGGTTGCAGGTTGGCGCCTCCTAAGTTTCGAGCTGGACTCAGTGAGTCTAGACTGTCAGCTGCCCAACC	TGGCAGGGTTCTTCACGGTTCCTTTTTACACTCGGACCTCGTCGACATGCATTTCCTTTGATCAGGGTTGCAGGTTGGCGCCTCCTAAGTTTCGAGCTGGACTCAGTGAGTCTAGACTGTCAGCTGCCCAACCTAGAGTCTCGT
ENST00000481247	ENSG00000183826	BTBD9	set16	ENSG00000183826	BTBD9	-46	8437	8465	29	GTTTCGAACACACGGTTTGTACATCTGCC	0.887849	-52.1785	0.482759	1	1	1	0	1	1	4	1	1	0	19	1	B7	TGGCAGGGTTCTTCACGGTTCCTTT	20	1	B8	AGTCTAGACTGTCAGCTGCCCAACC	TGGCAGGGTTCTTCACGGTTCCTTTTTACACTCGGACCTCGTCGACATGCATTGTTTCGAACACACGGTTTGTACATCTGCCCCTCCTAAGTTTCGAGCTGGACTCAGTGAGTCTAGACTGTCAGCTGCCCAACC	TGGCAGGGTTCTTCACGGTTCCTTTTTACACTCGGACCTCGTCGACATGCATTGTTTCGAACACACGGTTTGTACATCTGCCCCTCCTAAGTTTCGAGCTGGACTCAGTGAGTCTAGACTGTCAGCTGCCCAACCAGTGGACAT
ENST00000481247	ENSG00000183826	BTBD9	set16	ENSG00000183826	BTBD9	-46	4143	4168	26	AGGGCCGAGGCTTTGCAGCGTATTCC	0.872151	-54.0785	0.615385	1	1	1	0	1	1	4	1	1	0	19	1	B7	TGGCAGGGTTCTTCACGGTTCCTTT	20	1	B8	AGTCTAGACTGTCAGCTGCCCAACC	TGGCAGGGTTCTTCACGGTTCCTTTTTACACTCGGACCTCGTCGACATGCATTAGGGCCGAGGCTTTGCAGCGTATTCCCCTCCTAAGTTTCGAGCTGGACTCAGTGAGTCTAGACTGTCAGCTGCCCAACC	TGGCAGGGTTCTTCACGGTTCCTTTTTACACTCGGACCTCGTCGACATGCATTAGGGCCGAGGCTTTGCAGCGTATTCCCCTCCTAAGTTTCGAGCTGGACTCAGTGAGTCTAGACTGTCAGCTGCCCAACCGCGCCATGACTG
ENST00000481247	ENSG00000183826	BTBD9	set16	ENSG00000183826	BTBD9	-46	4089	4114	26	CTGCTATCTCGTTCCCGGAGCACAGG	0.977849	-52.7785	0.615385	1	1	1	0	1	1	4	1	1	0	19	1	B7	TGGCAGGGTTCTTCACGGTTCCTTT	20	1	B8	AGTCTAGACTGTCAGCTGCCCAACC	TGGCAGGGTTCTTCACGGTTCCTTTTTACACTCGGACCTCGTCGACATGCATTCTGCTATCTCGTTCCCGGAGCACAGGCCTCCTAAGTTTCGAGCTGGACTCAGTGAGTCTAGACTGTCAGCTGCCCAACC	TGGCAGGGTTCTTCACGGTTCCTTTTTACACTCGGACCTCGTCGACATGCATTCTGCTATCTCGTTCCCGGAGCACAGGCCTCCTAAGTTTCGAGCTGGACTCAGTGAGTCTAGACTGTCAGCTGCCCAACCGGAAAATTAAGC
ENST00000481247	ENSG00000183826	BTBD9	set16	ENSG00000183826	BTBD9	-46	4039	4063	25	GGGACTGGAGGGTTGCAGATGCAGG	0.932151	-53.0785	0.64	1	1	1	0	1	1	4	1	1	0	19	1	B7	TGGCAGGGTTCTTCACGGTTCCTTT	20	1	B8	AGTCTAGACTGTCAGCTGCCCAACC	TGGCAGGGTTCTTCACGGTTCCTTTTTACACTCGGACCTCGTCGACATGCATTGGGACTGGAGGGTTGCAGATGCAGGCCTCCTAAGTTTCGAGCTGGACTCAGTGAGTCTAGACTGTCAGCTGCCCAACC	TGGCAGGGTTCTTCACGGTTCCTTTTTACACTCGGACCTCGTCGACATGCATTGGGACTGGAGGGTTGCAGATGCAGGCCTCCTAAGTTTCGAGCTGGACTCAGTGAGTCTAGACTGTCAGCTGCCCAACCGCCTTCCACCTAT
ENST00000481247	ENSG00000183826	BTBD9	set16	ENSG00000183826	BTBD9	-46	2483	2511	29	ATCCGGAACACCTATGATTCACTGAGTGG	0.997849	-53.3785	0.482759	1	1	1	1	1	1	5	1	1	0	19	1	B7	TGGCAGGGTTCTTCACGGTTCCTTT	20	1	B8	AGTCTAGACTGTCAGCTGCCCAACC	TGGCAGGGTTCTTCACGGTTCCTTTTTACACTCGGACCTCGTCGACATGCATTATCCGGAACACCTATGATTCACTGAGTGGCCTCCTAAGTTTCGAGCTGGACTCAGTGAGTCTAGACTGTCAGCTGCCCAACC	TGGCAGGGTTCTTCACGGTTCCTTTTTACACTCGGACCTCGTCGACATGCATTATCCGGAACACCTATGATTCACTGAGTGGCCTCCTAAGTTTCGAGCTGGACTCAGTGAGTCTAGACTGTCAGCTGCCCAACCCATCTTCGG
ENST00000481247	ENSG00000183826	BTBD9	set16	ENSG00000183826	BTBD9	-46	2355	2381	27	TAGCAAAGGCCCAATGGCTTTCTCCTC	0.917849	-52.1785	0.518519	1	1	1	1	1	1	5	1	1	0	19	1	B7	TGGCAGGGTTCTTCACGGTTCCTTT	20	1	B8	AGTCTAGACTGTCAGCTGCCCAACC	TGGCAGGGTTCTTCACGGTTCCTTTTTACACTCGGACCTCGTCGACATGCATTTAGCAAAGGCCCAATGGCTTTCTCCTCCCTCCTAAGTTTCGAGCTGGACTCAGTGAGTCTAGACTGTCAGCTGCCCAACC	TGGCAGGGTTCTTCACGGTTCCTTTTTACACTCGGACCTCGTCGACATGCATTTAGCAAAGGCCCAATGGCTTTCTCCTCCCTCCTAAGTTTCGAGCTGGACTCAGTGAGTCTAGACTGTCAGCTGCCCAACCGCGGTTCGCTC
ENST00000481247	ENSG00000183826	BTBD9	set16	ENSG00000183826	BTBD9	-46	6639	6664	26	TGCAAAGGATGGGTGAGCACGCTGTC	0.992151	-52.8785	0.576923	1	1	1	1	1	1	5	1	1	0	19	1	B7	TGGCAGGGTTCTTCACGGTTCCTTT	20	1	B8	AGTCTAGACTGTCAGCTGCCCAACC	TGGCAGGGTTCTTCACGGTTCCTTTTTACACTCGGACCTCGTCGACATGCATTTGCAAAGGATGGGTGAGCACGCTGTCCCTCCTAAGTTTCGAGCTGGACTCAGTGAGTCTAGACTGTCAGCTGCCCAACC	TGGCAGGGTTCTTCACGGTTCCTTTTTACACTCGGACCTCGTCGACATGCATTTGCAAAGGATGGGTGAGCACGCTGTCCCTCCTAAGTTTCGAGCTGGACTCAGTGAGTCTAGACTGTCAGCTGCCCAACCAGCCGTCAGTTG
ENST00000481247	ENSG00000183826	BTBD9	set16	ENSG00000183826	BTBD9	-46	2014	2037	24	TTGCCCGAGCCCACCAAGTCACAC	0.867849	-50.6785	0.625	1	1	1	1	1	1	5	1	1	0	19	1	B7	TGGCAGGGTTCTTCACGGTTCCTTT	20	1	B8	AGTCTAGACTGTCAGCTGCCCAACC	TGGCAGGGTTCTTCACGGTTCCTTTTTACACTCGGACCTCGTCGACATGCATTTTGCCCGAGCCCACCAAGTCACACCCTCCTAAGTTTCGAGCTGGACTCAGTGAGTCTAGACTGTCAGCTGCCCAACC	TGGCAGGGTTCTTCACGGTTCCTTTTTACACTCGGACCTCGTCGACATGCATTTTGCCCGAGCCCACCAAGTCACACCCTCCTAAGTTTCGAGCTGGACTCAGTGAGTCTAGACTGTCAGCTGCCCAACCGGTCATCGATGGGG
ENST00000481247	ENSG00000183826	BTBD9	set16	ENSG00000183826	BTBD9	-46	1686	1714	29	GGAGACTTTAGTTCTGTCAGCAACCATGG	0.937849	-52.9785	0.482759	1	1	1	1	1	1	5	1	1	0	19	1	B7	TGGCAGGGTTCTTCACGGTTCCTTT	20	1	B8	AGTCTAGACTGTCAGCTGCCCAACC	TGGCAGGGTTCTTCACGGTTCCTTTTTACACTCGGACCTCGTCGACATGCATTGGAGACTTTAGTTCTGTCAGCAACCATGGCCTCCTAAGTTTCGAGCTGGACTCAGTGAGTCTAGACTGTCAGCTGCCCAACC	TGGCAGGGTTCTTCACGGTTCCTTTTTACACTCGGACCTCGTCGACATGCATTGGAGACTTTAGTTCTGTCAGCAACCATGGCCTCCTAAGTTTCGAGCTGGACTCAGTGAGTCTAGACTGTCAGCTGCCCAACCAGTGTAACA
ENST00000481247	ENSG00000183826	BTBD9	set16	ENSG00000183826	BTBD9	-46	1656	1684	29	CCACTGTTGCTGGTTGGTAGAAACCTCAA	0.972151	-53.4785	0.482759	1	1	1	1	1	1	5	1	1	0	19	1	B7	TGGCAGGGTTCTTCACGGTTCCTTT	20	1	B8	AGTCTAGACTGTCAGCTGCCCAACC	TGGCAGGGTTCTTCACGGTTCCTTTTTACACTCGGACCTCGTCGACATGCATTCCACTGTTGCTGGTTGGTAGAAACCTCAACCTCCTAAGTTTCGAGCTGGACTCAGTGAGTCTAGACTGTCAGCTGCCCAACC	TGGCAGGGTTCTTCACGGTTCCTTTTTACACTCGGACCTCGTCGACATGCATTCCACTGTTGCTGGTTGGTAGAAACCTCAACCTCCTAAGTTTCGAGCTGGACTCAGTGAGTCTAGACTGTCAGCTGCCCAACCCTAAAAGCT
ENST00000481247	ENSG00000183826	BTBD9	set16	ENSG00000183826	BTBD9	-46	1089	1116	28	GAACGGCAGTCATCATCAATTGGGTGCC	0.902151	-53.9785	0.535714	1	1	1	1	1	1	5	1	1	0	19	1	B7	TGGCAGGGTTCTTCACGGTTCCTTT	20	1	B8	AGTCTAGACTGTCAGCTGCCCAACC	TGGCAGGGTTCTTCACGGTTCCTTTTTACACTCGGACCTCGTCGACATGCATTGAACGGCAGTCATCATCAATTGGGTGCCCCTCCTAAGTTTCGAGCTGGACTCAGTGAGTCTAGACTGTCAGCTGCCCAACC	TGGCAGGGTTCTTCACGGTTCCTTTTTACACTCGGACCTCGTCGACATGCATTGAACGGCAGTCATCATCAATTGGGTGCCCCTCCTAAGTTTCGAGCTGGACTCAGTGAGTCTAGACTGTCAGCTGCCCAACCCCATGTCATT
ENST00000481247	ENSG00000183826	BTBD9	set16	ENSG00000183826	BTBD9	-46	3552	3576	25	TGGAGAGCTGCAGACCCTGGCTTCT	0.972151	-53.2785	0.6	1	1	1	0	1	1	4	1	1	0	19	1	B7	TGGCAGGGTTCTTCACGGTTCCTTT	20	1	B8	AGTCTAGACTGTCAGCTGCCCAACC	TGGCAGGGTTCTTCACGGTTCCTTTTTACACTCGGACCTCGTCGACATGCATTTGGAGAGCTGCAGACCCTGGCTTCTCCTCCTAAGTTTCGAGCTGGACTCAGTGAGTCTAGACTGTCAGCTGCCCAACC	TGGCAGGGTTCTTCACGGTTCCTTTTTACACTCGGACCTCGTCGACATGCATTTGGAGAGCTGCAGACCCTGGCTTCTCCTCCTAAGTTTCGAGCTGGACTCAGTGAGTCTAGACTGTCAGCTGCCCAACCGTAATACGCAGCG
ENST00000481247	ENSG00000183826	BTBD9	set16	ENSG00000183826	BTBD9	-46	5941	5970	30	TCTTTGACACCTTTCTTCCCTGTCCAAAGG	0.912151	-54.4785	0.466667	1	1	1	0	1	1	4	1	1	0	19	1	B7	TGGCAGGGTTCTTCACGGTTCCTTT	20	1	B8	AGTCTAGACTGTCAGCTGCCCAACC	TGGCAGGGTTCTTCACGGTTCCTTTTTACACTCGGACCTCGTCGACATGCATTTCTTTGACACCTTTCTTCCCTGTCCAAAGGCCTCCTAAGTTTCGAGCTGGACTCAGTGAGTCTAGACTGTCAGCTGCCCAACC	TGGCAGGGTTCTTCACGGTTCCTTTTTACACTCGGACCTCGTCGACATGCATTTCTTTGACACCTTTCTTCCCTGTCCAAAGGCCTCCTAAGTTTCGAGCTGGACTCAGTGAGTCTAGACTGTCAGCTGCCCAACCGTTGAGCT
ENST00000481247	ENSG00000183826	BTBD9	set16	ENSG00000183826	BTBD9	-46	5880	5908	29	CTCCATCTCTTTATCACCAAGTGGCCTCA	0.962151	-53.9785	0.482759	1	1	1	0	1	1	4	1	1	0	19	1	B7	TGGCAGGGTTCTTCACGGTTCCTTT	20	1	B8	AGTCTAGACTGTCAGCTGCCCAACC	TGGCAGGGTTCTTCACGGTTCCTTTTTACACTCGGACCTCGTCGACATGCATTCTCCATCTCTTTATCACCAAGTGGCCTCACCTCCTAAGTTTCGAGCTGGACTCAGTGAGTCTAGACTGTCAGCTGCCCAACC	TGGCAGGGTTCTTCACGGTTCCTTTTTACACTCGGACCTCGTCGACATGCATTCTCCATCTCTTTATCACCAAGTGGCCTCACCTCCTAAGTTTCGAGCTGGACTCAGTGAGTCTAGACTGTCAGCTGCCCAACCCACTCTTGA
ENST00000481247	ENSG00000183826	BTBD9	set16	ENSG00000183826	BTBD9	-46	7810	7835	26	CTGACCCTGGAAGCAGCTGATTGAGG	0.887849	-51.7785	0.576923	1	1	1	1	1	1	5	1	1	0	19	1	B7	TGGCAGGGTTCTTCACGGTTCCTTT	20	1	B8	AGTCTAGACTGTCAGCTGCCCAACC	TGGCAGGGTTCTTCACGGTTCCTTTTTACACTCGGACCTCGTCGACATGCATTCTGACCCTGGAAGCAGCTGATTGAGGCCTCCTAAGTTTCGAGCTGGACTCAGTGAGTCTAGACTGTCAGCTGCCCAACC	TGGCAGGGTTCTTCACGGTTCCTTTTTACACTCGGACCTCGTCGACATGCATTCTGACCCTGGAAGCAGCTGATTGAGGCCTCCTAAGTTTCGAGCTGGACTCAGTGAGTCTAGACTGTCAGCTGCCCAACCTACCTCTGTACA
ENST00000481247	ENSG00000183826	BTBD9	set16	ENSG00000183826	BTBD9	-46	3159	3183	25	GAGGGGCAGGCAATGTTGTGCGCAG	0.982151	-52.4785	0.64	1	1	1	0	1	1	4	1	1	0	19	1	B7	TGGCAGGGTTCTTCACGGTTCCTTT	20	1	B8	AGTCTAGACTGTCAGCTGCCCAACC	TGGCAGGGTTCTTCACGGTTCCTTTTTACACTCGGACCTCGTCGACATGCATTGAGGGGCAGGCAATGTTGTGCGCAGCCTCCTAAGTTTCGAGCTGGACTCAGTGAGTCTAGACTGTCAGCTGCCCAACC	TGGCAGGGTTCTTCACGGTTCCTTTTTACACTCGGACCTCGTCGACATGCATTGAGGGGCAGGCAATGTTGTGCGCAGCCTCCTAAGTTTCGAGCTGGACTCAGTGAGTCTAGACTGTCAGCTGCCCAACCTTACGTAGCTAAA
ENST00000481247	ENSG00000183826	BTBD9	set16	ENSG00000183826	BTBD9	-46	2958	2983	26	TTCTGCGTTCCTGACGCTGATGGGCA	0.962151	-53.2785	0.576923	1	1	1	0	1	1	4	1	1	0	19	1	B7	TGGCAGGGTTCTTCACGGTTCCTTT	20	1	B8	AGTCTAGACTGTCAGCTGCCCAACC	TGGCAGGGTTCTTCACGGTTCCTTTTTACACTCGGACCTCGTCGACATGCATTTTCTGCGTTCCTGACGCTGATGGGCACCTCCTAAGTTTCGAGCTGGACTCAGTGAGTCTAGACTGTCAGCTGCCCAACC	TGGCAGGGTTCTTCACGGTTCCTTTTTACACTCGGACCTCGTCGACATGCATTTTCTGCGTTCCTGACGCTGATGGGCACCTCCTAAGTTTCGAGCTGGACTCAGTGAGTCTAGACTGTCAGCTGCCCAACCCATCGGTTTCTA
ENST00000481247	ENSG00000183826	BTBD9	set16	ENSG00000183826	BTBD9	-46	2929	2956	28	GTGGCTGCCTCTCCAATGCTTCGATAAA	0.947849	-52.8785	0.5	1	1	1	0	1	1	4	1	1	0	19	1	B7	TGGCAGGGTTCTTCACGGTTCCTTT	20	1	B8	AGTCTAGACTGTCAGCTGCCCAACC	TGGCAGGGTTCTTCACGGTTCCTTTTTACACTCGGACCTCGTCGACATGCATTGTGGCTGCCTCTCCAATGCTTCGATAAACCTCCTAAGTTTCGAGCTGGACTCAGTGAGTCTAGACTGTCAGCTGCCCAACC	TGGCAGGGTTCTTCACGGTTCCTTTTTACACTCGGACCTCGTCGACATGCATTGTGGCTGCCTCTCCAATGCTTCGATAAACCTCCTAAGTTTCGAGCTGGACTCAGTGAGTCTAGACTGTCAGCTGCCCAACCAGAGAAAGCA
ENST00000481247	ENSG00000183826	BTBD9	set16	ENSG00000183826	BTBD9	-46	2787	2815	29	GTAACTATTTCCTTGTCAGCCTCCCAAGC	0.967849	-53.2785	0.482759	1	1	1	0	1	1	4	1	1	0	19	1	B7	TGGCAGGGTTCTTCACGGTTCCTTT	20	1	B8	AGTCTAGACTGTCAGCTGCCCAACC	TGGCAGGGTTCTTCACGGTTCCTTTTTACACTCGGACCTCGTCGACATGCATTGTAACTATTTCCTTGTCAGCCTCCCAAGCCCTCCTAAGTTTCGAGCTGGACTCAGTGAGTCTAGACTGTCAGCTGCCCAACC	TGGCAGGGTTCTTCACGGTTCCTTTTTACACTCGGACCTCGTCGACATGCATTGTAACTATTTCCTTGTCAGCCTCCCAAGCCCTCCTAAGTTTCGAGCTGGACTCAGTGAGTCTAGACTGTCAGCTGCCCAACCCAGTTATAT
ENST00000481247	ENSG00000183826	BTBD9	set16	ENSG00000183826	BTBD9	-46	4419	4445	27	AAGGAGGTGAACCCGTGTCCTTTTGGA	0.947849	-52.1785	0.518519	1	1	1	1	1	1	5	1	1	0	19	1	B7	TGGCAGGGTTCTTCACGGTTCCTTT	20	1	B8	AGTCTAGACTGTCAGCTGCCCAACC	TGGCAGGGTTCTTCACGGTTCCTTTTTACACTCGGACCTCGTCGACATGCATTAAGGAGGTGAACCCGTGTCCTTTTGGACCTCCTAAGTTTCGAGCTGGACTCAGTGAGTCTAGACTGTCAGCTGCCCAACC	TGGCAGGGTTCTTCACGGTTCCTTTTTACACTCGGACCTCGTCGACATGCATTAAGGAGGTGAACCCGTGTCCTTTTGGACCTCCTAAGTTTCGAGCTGGACTCAGTGAGTCTAGACTGTCAGCTGCCCAACCTGAGAGTGCAT
ENST00000481247	ENSG00000183826	BTBD9	set16	ENSG00000183826	BTBD9	-46	3936	3960	25	CCTCTGGGCAGGTGATGCCCATGTT	0.967849	-51.7785	0.6	1	1	1	0	1	1	4	1	1	0	19	1	B7	TGGCAGGGTTCTTCACGGTTCCTTT	20	1	B8	AGTCTAGACTGTCAGCTGCCCAACC	TGGCAGGGTTCTTCACGGTTCCTTTTTACACTCGGACCTCGTCGACATGCATTCCTCTGGGCAGGTGATGCCCATGTTCCTCCTAAGTTTCGAGCTGGACTCAGTGAGTCTAGACTGTCAGCTGCCCAACC	TGGCAGGGTTCTTCACGGTTCCTTTTTACACTCGGACCTCGTCGACATGCATTCCTCTGGGCAGGTGATGCCCATGTTCCTCCTAAGTTTCGAGCTGGACTCAGTGAGTCTAGACTGTCAGCTGCCCAACCTCTTTCGATCCCT
ENST00000481247	ENSG00000183826	BTBD9	set16	ENSG00000183826	BTBD9	-46	6210	6240	31	CTGCACTTTAAATTCCTAACTGAACTCCTGC	0.867849	-52.7785	0.419355	1	1	1	1	1	1	5	1	1	0	19	1	B7	TGGCAGGGTTCTTCACGGTTCCTTT	20	1	B8	AGTCTAGACTGTCAGCTGCCCAACC	TGGCAGGGTTCTTCACGGTTCCTTTTTACACTCGGACCTCGTCGACATGCATTCTGCACTTTAAATTCCTAACTGAACTCCTGCCCTCCTAAGTTTCGAGCTGGACTCAGTGAGTCTAGACTGTCAGCTGCCCAACC	TGGCAGGGTTCTTCACGGTTCCTTTTTACACTCGGACCTCGTCGACATGCATTCTGCACTTTAAATTCCTAACTGAACTCCTGCCCTCCTAAGTTTCGAGCTGGACTCAGTGAGTCTAGACTGTCAGCTGCCCAACCCGCGAGA
ENST00000481247	ENSG00000183826	BTBD9	set16	ENSG00000183826	BTBD9	-46	5910	5939	30	AGGTTCTTAATTGAAGTCTGTGAGGGGAGC	0.892151	-55.0785	0.466667	1	1	1	1	1	1	5	1	1	0	19	1	B7	TGGCAGGGTTCTTCACGGTTCCTTT	20	1	B8	AGTCTAGACTGTCAGCTGCCCAACC	TGGCAGGGTTCTTCACGGTTCCTTTTTACACTCGGACCTCGTCGACATGCATTAGGTTCTTAATTGAAGTCTGTGAGGGGAGCCCTCCTAAGTTTCGAGCTGGACTCAGTGAGTCTAGACTGTCAGCTGCCCAACC	TGGCAGGGTTCTTCACGGTTCCTTTTTACACTCGGACCTCGTCGACATGCATTAGGTTCTTAATTGAAGTCTGTGAGGGGAGCCCTCCTAAGTTTCGAGCTGGACTCAGTGAGTCTAGACTGTCAGCTGCCCAACCCCGGTCTA
ENST00000481247	ENSG00000183826	BTBD9	set16	ENSG00000183826	BTBD9	-46	4311	4339	29	TCCTCACCAATGACATCTACTGTTAGTGC	0.877849	-52.4785	0.448276	1	1	1	1	1	0	4	1	1	0	19	1	B7	TGGCAGGGTTCTTCACGGTTCCTTT	20	1	B8	AGTCTAGACTGTCAGCTGCCCAACC	TGGCAGGGTTCTTCACGGTTCCTTTTTACACTCGGACCTCGTCGACATGCATTTCCTCACCAATGACATCTACTGTTAGTGCCCTCCTAAGTTTCGAGCTGGACTCAGTGAGTCTAGACTGTCAGCTGCCCAACC	TGGCAGGGTTCTTCACGGTTCCTTTTTACACTCGGACCTCGTCGACATGCATTTCCTCACCAATGACATCTACTGTTAGTGCCCTCCTAAGTTTCGAGCTGGACTCAGTGAGTCTAGACTGTCAGCTGCCCAACCAGCATGAAG
ENST00000481247	ENSG00000183826	BTBD9	set16	ENSG00000183826	BTBD9	-46	8313	8341	29	AGTTTTAGACGGAGCTTCTGGAGTCACAG	0.927849	-53.2785	0.482759	1	1	1	1	1	1	5	1	1	0	19	1	B7	TGGCAGGGTTCTTCACGGTTCCTTT	20	1	B8	AGTCTAGACTGTCAGCTGCCCAACC	TGGCAGGGTTCTTCACGGTTCCTTTTTACACTCGGACCTCGTCGACATGCATTAGTTTTAGACGGAGCTTCTGGAGTCACAGCCTCCTAAGTTTCGAGCTGGACTCAGTGAGTCTAGACTGTCAGCTGCCCAACC	TGGCAGGGTTCTTCACGGTTCCTTTTTACACTCGGACCTCGTCGACATGCATTAGTTTTAGACGGAGCTTCTGGAGTCACAGCCTCCTAAGTTTCGAGCTGGACTCAGTGAGTCTAGACTGTCAGCTGCCCAACCTGTAAGCGG
ENST00000481247	ENSG00000183826	BTBD9	set16	ENSG00000183826	BTBD9	-46	3372	3397	26	GAAGCGGCTGACCCGTTGGCTCTTTC	0.962151	-53.3785	0.615385	1	1	1	0	1	1	4	1	1	0	19	1	B7	TGGCAGGGTTCTTCACGGTTCCTTT	20	1	B8	AGTCTAGACTGTCAGCTGCCCAACC	TGGCAGGGTTCTTCACGGTTCCTTTTTACACTCGGACCTCGTCGACATGCATTGAAGCGGCTGACCCGTTGGCTCTTTCCCTCCTAAGTTTCGAGCTGGACTCAGTGAGTCTAGACTGTCAGCTGCCCAACC	TGGCAGGGTTCTTCACGGTTCCTTTTTACACTCGGACCTCGTCGACATGCATTGAAGCGGCTGACCCGTTGGCTCTTTCCCTCCTAAGTTTCGAGCTGGACTCAGTGAGTCTAGACTGTCAGCTGCCCAACCGGTGGAGACCTT
ENST00000481247	ENSG00000183826	BTBD9	set16	ENSG00000183826	BTBD9	-46	8176	8205	30	TGTTCTCTGGTGAATCCGGATTCAAGACAG	0.942151	-54.4785	0.466667	1	1	1	1	1	1	5	1	1	0	19	1	B7	TGGCAGGGTTCTTCACGGTTCCTTT	20	1	B8	AGTCTAGACTGTCAGCTGCCCAACC	TGGCAGGGTTCTTCACGGTTCCTTTTTACACTCGGACCTCGTCGACATGCATTTGTTCTCTGGTGAATCCGGATTCAAGACAGCCTCCTAAGTTTCGAGCTGGACTCAGTGAGTCTAGACTGTCAGCTGCCCAACC	TGGCAGGGTTCTTCACGGTTCCTTTTTACACTCGGACCTCGTCGACATGCATTTGTTCTCTGGTGAATCCGGATTCAAGACAGCCTCCTAAGTTTCGAGCTGGACTCAGTGAGTCTAGACTGTCAGCTGCCCAACCCTCCTTTT
[truncated: 11,626 more rows]
